# Supplementary material for: Dual histone methyl reader ZCWPW1 facilitates repair of meiotic double strand breaks in male mice
Source: eLife. 2020 Apr 30;9:e53360. doi: 10.7554/eLife.53360 (PMC7237205; doi:10.7554/eLife.53360)
Supplement: Figure 1—source data 1. [file elife-53360-fig1-data1.xlsx]

## Sheet: Prdm9 correlation
Results of Spearman’s correlation analysis between Prdm9 and each gene in the single cell RNA-seq dataset (Chen et al., 2018)
Gene name	Correlation coefficient (rho)	p-Value	q-Value
Zcwpw1	0.518747	2e-06	1.74287e-05
Tex15	0.513706	2e-06	1.74287e-05
Taf7l	0.502604	2e-06	1.74287e-05
Lig1	0.498973	2e-06	1.74287e-05
Lrrc42	0.488284	2e-06	1.74287e-05
Prss50	0.48612	2e-06	1.74287e-05
Tipin	0.478937	2e-06	1.74287e-05
Hells	0.474685	2e-06	1.74287e-05
Dek	0.472487	2e-06	1.74287e-05
Hsbp1	-0.471836	2e-06	1.74287e-05
Tsc22d3	0.471686	2e-06	1.74287e-05
Hmgn2	0.469473	2e-06	1.74287e-05
Stra8	0.468626	2e-06	1.74287e-05
Rhox13	0.467718	2e-06	1.74287e-05
Rnaset2b	0.465148	2e-06	1.74287e-05
Smc3	0.463483	2e-06	1.74287e-05
Nmt2	0.463037	2e-06	1.74287e-05
Pebp1	-0.462322	2e-06	1.74287e-05
Ttc3	0.461535	2e-06	1.74287e-05
Ptma	0.460552	2e-06	1.74287e-05
Ncl	0.460111	2e-06	1.74287e-05
Rangrf	-0.459824	2e-06	1.74287e-05
Cox6b2	-0.457101	2e-06	1.74287e-05
Slc25a39	-0.455844	2e-06	1.74287e-05
2810428I15Rik	0.455753	2e-06	1.74287e-05
Rbmx2	0.455317	2e-06	1.74287e-05
Akap5	0.455229	2e-06	1.74287e-05
M1ap	0.455151	2e-06	1.74287e-05
Odf2	-0.454659	2e-06	1.74287e-05
Six5	0.454058	2e-06	1.74287e-05
Tctex1d2	-0.453119	2e-06	1.74287e-05
Rpl39	0.452764	2e-06	1.74287e-05
Mcm5	0.45153	2e-06	1.74287e-05
Rps28	0.451308	2e-06	1.74287e-05
Tmem97	-0.449668	2e-06	1.74287e-05
Dctpp1	0.448494	2e-06	1.74287e-05
Kctd19	-0.446808	2e-06	1.74287e-05
Gm1821	-0.446573	2e-06	1.74287e-05
Efcab10	-0.446405	2e-06	1.74287e-05
Mpc1	0.444869	2e-06	1.74287e-05
Cdk2ap2	0.44364	2e-06	1.74287e-05
Esco2	0.442963	2e-06	1.74287e-05
Rpl18a	0.442572	2e-06	1.74287e-05
Oscp1	-0.441671	2e-06	1.74287e-05
Spcs1	-0.440402	2e-06	1.74287e-05
Hprt	0.440276	2e-06	1.74287e-05
Casp8ap2	0.440132	2e-06	1.74287e-05
Grina	-0.438948	2e-06	1.74287e-05
Zmynd8	0.438651	2e-06	1.74287e-05
Rpl13a	0.438577	2e-06	1.74287e-05
Lrrc17	0.43679	2e-06	1.74287e-05
1700011I03Rik	-0.436078	2e-06	1.74287e-05
Calm3	-0.436061	2e-06	1.74287e-05
Pabpc1	-0.436003	2e-06	1.74287e-05
Dnajb3	-0.435682	2e-06	1.74287e-05
Rpl36a	0.435252	2e-06	1.74287e-05
Spata33	-0.434884	2e-06	1.74287e-05
Pola2	0.434195	2e-06	1.74287e-05
Map1lc3a	-0.433961	2e-06	1.74287e-05
Rpl39l	-0.433256	2e-06	1.74287e-05
Gstm5	-0.432907	2e-06	1.74287e-05
Cdc42se2	0.431464	2e-06	1.74287e-05
Ssx2ip	-0.430931	2e-06	1.74287e-05
Pbx4	-0.430615	2e-06	1.74287e-05
Tsacc	-0.429855	2e-06	1.74287e-05
Hmgb1	0.429713	2e-06	1.74287e-05
Nsmce1	-0.429	2e-06	1.74287e-05
Pam16	-0.428538	2e-06	1.74287e-05
1700021F07Rik	-0.428382	2e-06	1.74287e-05
1700019A02Rik	-0.427989	2e-06	1.74287e-05
Dmc1	0.427281	2e-06	1.74287e-05
Ldhal6b	-0.427241	2e-06	1.74287e-05
Ppa1	0.426989	2e-06	1.74287e-05
Ddx10	0.426535	2e-06	1.74287e-05
1700019B21Rik	0.426057	2e-06	1.74287e-05
Rps19	0.425292	2e-06	1.74287e-05
Rpl10l	-0.424921	2e-06	1.74287e-05
Clgn	-0.424482	2e-06	1.74287e-05
Nme5	-0.424195	2e-06	1.74287e-05
Fam178b	-0.424112	2e-06	1.74287e-05
Tex11	0.423653	2e-06	1.74287e-05
Spata24	-0.423623	2e-06	1.74287e-05
Ropn1l	-0.423252	2e-06	1.74287e-05
Gm5617	-0.422595	2e-06	1.74287e-05
Dkkl1	-0.421916	2e-06	1.74287e-05
Ppp1r11	-0.421667	2e-06	1.74287e-05
Rnf32	-0.421607	2e-06	1.74287e-05
Lancl1	-0.42084	2e-06	1.74287e-05
B9d1	-0.420073	2e-06	1.74287e-05
Mns1	-0.41965	2e-06	1.74287e-05
Haus8	0.419306	2e-06	1.74287e-05
Ddx25	-0.41871	2e-06	1.74287e-05
1110017D15Rik	-0.418374	2e-06	1.74287e-05
Cby1	-0.418124	2e-06	1.74287e-05
Zfand4	-0.418034	2e-06	1.74287e-05
Hdgf	-0.417928	2e-06	1.74287e-05
Efhc1	-0.417876	2e-06	1.74287e-05
1700013H16Rik	0.41782	2e-06	1.74287e-05
Gm364	0.41733	2e-06	1.74287e-05
Gm11837	-0.41725	2e-06	1.74287e-05
Siva1	0.417155	2e-06	1.74287e-05
Smim24	-0.417077	2e-06	1.74287e-05
Sucla2	-0.41686	2e-06	1.74287e-05
Tcea2	-0.416612	2e-06	1.74287e-05
Ube2d2b	-0.416558	2e-06	1.74287e-05
A230046K03Rik	0.41651	2e-06	1.74287e-05
Pgp	-0.41649	2e-06	1.74287e-05
Ypel1	-0.416466	2e-06	1.74287e-05
Irak1bp1	-0.415946	2e-06	1.74287e-05
Dnajb2	-0.415908	2e-06	1.74287e-05
Nxf2	0.415801	2e-06	1.74287e-05
Riiad1	-0.414777	2e-06	1.74287e-05
Dynlt1a	-0.414741	2e-06	1.74287e-05
Syce2	0.414615	2e-06	1.74287e-05
Gm2762	-0.414499	2e-06	1.74287e-05
4833427G06Rik	-0.413874	2e-06	1.74287e-05
Pdcl2	-0.413249	2e-06	1.74287e-05
Sephs2	-0.413172	2e-06	1.74287e-05
Etfa	0.412857	2e-06	1.74287e-05
Znhit1	-0.41272	2e-06	1.74287e-05
1700020N01Rik	-0.412601	2e-06	1.74287e-05
Ccdc113	-0.412354	2e-06	1.74287e-05
Rsph9	-0.412255	2e-06	1.74287e-05
Rpl21	0.41192	2e-06	1.74287e-05
Myl4	-0.411911	2e-06	1.74287e-05
Gm973	-0.41185	2e-06	1.74287e-05
Stard6	-0.411247	2e-06	1.74287e-05
Rpl10	0.411192	2e-06	1.74287e-05
C1qtnf4	-0.410883	2e-06	1.74287e-05
Usp2	-0.410499	2e-06	1.74287e-05
Uba52	0.410167	2e-06	1.74287e-05
Ccdc136	-0.409972	2e-06	1.74287e-05
Ift22	-0.409713	2e-06	1.74287e-05
Dbil5	-0.409413	2e-06	1.74287e-05
Gk2	-0.409357	2e-06	1.74287e-05
Smc1b	0.409005	2e-06	1.74287e-05
Gpx4	-0.408934	2e-06	1.74287e-05
Rps27l	0.408458	2e-06	1.74287e-05
Sord	-0.40826	2e-06	1.74287e-05
Limd2	-0.408193	2e-06	1.74287e-05
Fabp9	-0.40778	2e-06	1.74287e-05
Tekt1	-0.407657	2e-06	1.74287e-05
Nrbp1	0.407642	2e-06	1.74287e-05
4930504O13Rik	-0.407406	2e-06	1.74287e-05
Gsto2	-0.407338	2e-06	1.74287e-05
Fank1	-0.407087	2e-06	1.74287e-05
4930453N24Rik	-0.406757	2e-06	1.74287e-05
1700018B24Rik	-0.406671	2e-06	1.74287e-05
Wdr54	-0.406326	2e-06	1.74287e-05
Eid3	-0.405939	2e-06	1.74287e-05
Ms4a13	-0.405903	2e-06	1.74287e-05
Lrrc27	-0.405458	2e-06	1.74287e-05
Pbld1	0.405422	2e-06	1.74287e-05
Cfap45	-0.405345	2e-06	1.74287e-05
Scml2	0.405258	2e-06	1.74287e-05
Rpl10a	0.405217	2e-06	1.74287e-05
Mzt2	-0.405022	2e-06	1.74287e-05
Insl6	-0.404654	2e-06	1.74287e-05
Ttll13	-0.404641	2e-06	1.74287e-05
Hyls1	-0.404587	2e-06	1.74287e-05
Ndufa1	0.404565	2e-06	1.74287e-05
Ptcra	0.404354	2e-06	1.74287e-05
Sh3glb1	-0.404223	2e-06	1.74287e-05
Morn5	-0.404157	2e-06	1.74287e-05
Rbbp7	0.40413	2e-06	1.74287e-05
Ankrd45	-0.403873	2e-06	1.74287e-05
Nsun7	-0.403776	2e-06	1.74287e-05
Asrgl1	-0.40372	2e-06	1.74287e-05
4933415F23Rik	-0.403693	2e-06	1.74287e-05
Gtf2a1l	-0.403654	2e-06	1.74287e-05
Ppp1r16b	0.403652	2e-06	1.74287e-05
Dynlrb1	0.40355	2e-06	1.74287e-05
Tmem120a	-0.403471	2e-06	1.74287e-05
Nudt18	-0.403462	2e-06	1.74287e-05
Pifo	-0.403325	2e-06	1.74287e-05
Acr	-0.403298	2e-06	1.74287e-05
Prim1	0.403229	2e-06	1.74287e-05
Rplp2	0.403174	2e-06	1.74287e-05
2700046G09Rik	-0.403135	2e-06	1.74287e-05
Spa17	-0.403075	2e-06	1.74287e-05
Atp8b3	-0.402691	2e-06	1.74287e-05
Rn45s	0.402349	2e-06	1.74287e-05
Agpat3	-0.402164	2e-06	1.74287e-05
Wfdc3	-0.40168	2e-06	1.74287e-05
Suv39h1	0.401459	2e-06	1.74287e-05
Cetn4	-0.40141	2e-06	1.74287e-05
1110004E09Rik	-0.401167	2e-06	1.74287e-05
Phf7	-0.401131	2e-06	1.74287e-05
Lrrcc1	-0.400383	2e-06	1.74287e-05
Zfp935	0.400248	2e-06	1.74287e-05
Ube2u	-0.400141	2e-06	1.74287e-05
Chrac1	-0.400066	2e-06	1.74287e-05
Znhit2	-0.400051	2e-06	1.74287e-05
Ppp1r42	-0.399908	2e-06	1.74287e-05
Fam229b	-0.399557	2e-06	1.74287e-05
Abhd8	-0.399511	2e-06	1.74287e-05
Comt	0.399384	2e-06	1.74287e-05
Tmem89	-0.399207	2e-06	1.74287e-05
Wdr31	-0.399124	2e-06	1.74287e-05
Ankrd36	-0.398875	2e-06	1.74287e-05
Spag6	-0.398869	2e-06	1.74287e-05
Gm16702	0.398774	2e-06	1.74287e-05
Morn2	-0.398192	2e-06	1.74287e-05
Ccdc60	-0.39817	2e-06	1.74287e-05
Rnf126	-0.397953	2e-06	1.74287e-05
Acyp1	-0.397885	2e-06	1.74287e-05
Mcm6	0.397789	2e-06	1.74287e-05
Ccl27a	-0.397169	2e-06	1.74287e-05
Gm128	-0.396875	2e-06	1.74287e-05
Enkur	-0.396791	2e-06	1.74287e-05
Ldhc	-0.396772	2e-06	1.74287e-05
1700037H04Rik	-0.396546	2e-06	1.74287e-05
Cfap126	-0.396499	2e-06	1.74287e-05
Coq4	-0.396323	2e-06	1.74287e-05
Meig1	-0.395936	2e-06	1.74287e-05
1700086L19Rik	-0.395871	2e-06	1.74287e-05
Fmr1nb	0.395805	2e-06	1.74287e-05
Hdhd1a	-0.395803	2e-06	1.74287e-05
Ldha	-0.395648	2e-06	1.74287e-05
Taf9	-0.395483	2e-06	1.74287e-05
Ppp2r1b	-0.39532	2e-06	1.74287e-05
Polr2j	0.395214	2e-06	1.74287e-05
Adam2	-0.394957	2e-06	1.74287e-05
1700003M02Rik	-0.3949	2e-06	1.74287e-05
Gykl1	-0.394613	2e-06	1.74287e-05
Dynlrb2	-0.394197	2e-06	1.74287e-05
Rpl22	0.394095	2e-06	1.74287e-05
1700097N02Rik	-0.394009	2e-06	1.74287e-05
1700010I14Rik	-0.394005	2e-06	1.74287e-05
Cox8c	-0.393915	2e-06	1.74287e-05
Rpl32	0.393789	2e-06	1.74287e-05
Ap2m1	0.393726	2e-06	1.74287e-05
Larp1	-0.393665	2e-06	1.74287e-05
Gas8	-0.393569	2e-06	1.74287e-05
Exosc2	0.393405	2e-06	1.74287e-05
Hat1	0.393235	2e-06	1.74287e-05
Fhl4	-0.393208	2e-06	1.74287e-05
Lkaaear1	-0.392906	2e-06	1.74287e-05
Pabpc2	-0.392545	2e-06	1.74287e-05
Acrbp	-0.392537	2e-06	1.74287e-05
Tsnaxip1	-0.392332	2e-06	1.74287e-05
Tom1	-0.39229	2e-06	1.74287e-05
Dnaaf1	-0.392237	2e-06	1.74287e-05
Uqcr11	0.392198	2e-06	1.74287e-05
Spata4	-0.392185	2e-06	1.74287e-05
4922502D21Rik	-0.392078	2e-06	1.74287e-05
Slc9b1	-0.392073	2e-06	1.74287e-05
Npm1	0.391973	2e-06	1.74287e-05
Ankrd54	-0.391531	2e-06	1.74287e-05
Spink2	-0.391491	2e-06	1.74287e-05
Sccpdh	-0.391474	2e-06	1.74287e-05
AA467197	-0.391266	2e-06	1.74287e-05
Mroh4	-0.391177	2e-06	1.74287e-05
Hsbp1l1	-0.391093	2e-06	1.74287e-05
Pdha2	-0.391074	2e-06	1.74287e-05
Rfx2	-0.390975	2e-06	1.74287e-05
Lypd4	-0.390955	2e-06	1.74287e-05
Dazl	0.39095	2e-06	1.74287e-05
Smpd5	-0.390919	2e-06	1.74287e-05
Cfap69	-0.390787	2e-06	1.74287e-05
Ptpmt1	-0.390749	2e-06	1.74287e-05
Casc4	0.390646	2e-06	1.74287e-05
Arl3	-0.390322	2e-06	1.74287e-05
Ttll9	-0.390192	2e-06	1.74287e-05
Spag17	-0.389958	2e-06	1.74287e-05
Ptdss2	-0.389913	2e-06	1.74287e-05
Cage1	-0.38961	2e-06	1.74287e-05
Rwdd4a	-0.389495	2e-06	1.74287e-05
Tsga8	-0.389495	2e-06	1.74287e-05
Fam50b	-0.389458	2e-06	1.74287e-05
Anapc5	0.389365	2e-06	1.74287e-05
Als2cr12	-0.389251	2e-06	1.74287e-05
Cetn1	-0.389225	2e-06	1.74287e-05
Sugp2	-0.389203	2e-06	1.74287e-05
Lrwd1	-0.389004	2e-06	1.74287e-05
Erich2	-0.388987	2e-06	1.74287e-05
5330417C22Rik	-0.388966	2e-06	1.74287e-05
Rsph1	-0.388964	2e-06	1.74287e-05
Timm17b	0.388853	2e-06	1.74287e-05
Rplp1	0.388753	2e-06	1.74287e-05
Kif9	-0.388593	2e-06	1.74287e-05
Ppp1r32	-0.388037	2e-06	1.74287e-05
Wdr60	-0.38801	2e-06	1.74287e-05
Txnl1	0.387969	2e-06	1.74287e-05
Tex40	-0.387817	2e-06	1.74287e-05
Cenpv	-0.387662	2e-06	1.74287e-05
Ppp1r36	-0.38765	2e-06	1.74287e-05
Trafd1	-0.387608	2e-06	1.74287e-05
Cfap36	-0.387382	2e-06	1.74287e-05
Ccdc89	-0.387123	2e-06	1.74287e-05
Serp1	-0.387118	2e-06	1.74287e-05
Iqce	-0.387032	2e-06	1.74287e-05
Xrra1	-0.386944	2e-06	1.74287e-05
4930452G13Rik	-0.386708	2e-06	1.74287e-05
Dnajb13	-0.386682	2e-06	1.74287e-05
Gm166	-0.386481	2e-06	1.74287e-05
Fbxw5	-0.386252	2e-06	1.74287e-05
Spesp1	-0.386186	2e-06	1.74287e-05
1700029M20Rik	-0.386082	2e-06	1.74287e-05
Adam5	-0.385985	2e-06	1.74287e-05
Arl2bp	-0.385795	2e-06	1.74287e-05
Gsg2	-0.385785	2e-06	1.74287e-05
1700010B08Rik	-0.385618	2e-06	1.74287e-05
Ccdc175	-0.385617	2e-06	1.74287e-05
Abhd14a	-0.38552	2e-06	1.74287e-05
Mad2l2	-0.38543	2e-06	1.74287e-05
Ndufa4	0.385331	2e-06	1.74287e-05
Wbp2	-0.385278	2e-06	1.74287e-05
Ppp1r2-ps3	-0.385229	2e-06	1.74287e-05
Pigp	0.385144	2e-06	1.74287e-05
1700001O22Rik	-0.385062	2e-06	1.74287e-05
Hdgfl1	-0.384969	2e-06	1.74287e-05
Spata17	-0.384589	2e-06	1.74287e-05
Rpsa	0.384483	2e-06	1.74287e-05
Hspa4l	-0.384449	2e-06	1.74287e-05
Zrsr2	0.384379	2e-06	1.74287e-05
Morc2b	-0.384201	2e-06	1.74287e-05
Ccpg1os	-0.384053	2e-06	1.74287e-05
Cirbp	0.383998	2e-06	1.74287e-05
Rrm2	0.383781	2e-06	1.74287e-05
Loxl2	0.383757	2e-06	1.74287e-05
Gtsf1	-0.383743	2e-06	1.74287e-05
Actl7b	-0.383726	2e-06	1.74287e-05
Snrpg	0.383634	2e-06	1.74287e-05
Ssb	0.383382	2e-06	1.74287e-05
Rad51	0.383346	2e-06	1.74287e-05
Rab14	0.383326	2e-06	1.74287e-05
43169	-0.383283	2e-06	1.74287e-05
Rgs10	-0.383238	2e-06	1.74287e-05
Pde1c	-0.383194	2e-06	1.74287e-05
Odf4	-0.383157	2e-06	1.74287e-05
Actl9	-0.383147	2e-06	1.74287e-05
Ak8	-0.382949	2e-06	1.74287e-05
Fbxo36	-0.382879	2e-06	1.74287e-05
Pla2g2c	-0.382771	2e-06	1.74287e-05
Prps1l1	-0.382652	2e-06	1.74287e-05
1700003E16Rik	-0.382502	2e-06	1.74287e-05
Znrd1as	-0.382034	2e-06	1.74287e-05
Hrasls	-0.381951	2e-06	1.74287e-05
Lrrc46	-0.381804	2e-06	1.74287e-05
1700012B09Rik	-0.381771	2e-06	1.74287e-05
Mtfr1	-0.381457	2e-06	1.74287e-05
Spata16	-0.381335	2e-06	1.74287e-05
1700074P13Rik	-0.381238	2e-06	1.74287e-05
Tmem232	-0.381165	2e-06	1.74287e-05
Lyar	-0.381161	2e-06	1.74287e-05
Crisp2	-0.380857	2e-06	1.74287e-05
Pbdc1	0.380743	2e-06	1.74287e-05
Vkorc1	0.380681	2e-06	1.74287e-05
1700028P14Rik	-0.380525	2e-06	1.74287e-05
4931417E11Rik	-0.380213	2e-06	1.74287e-05
Gas2l3	0.380137	2e-06	1.74287e-05
Ccdc92	-0.380127	2e-06	1.74287e-05
1700018B08Rik	-0.380038	2e-06	1.74287e-05
Mpi	-0.379739	2e-06	1.74287e-05
Ccdc65	-0.379566	2e-06	1.74287e-05
Pih1d1	-0.379392	2e-06	1.74287e-05
Rab11fip5	-0.379272	2e-06	1.74287e-05
Lrriq3	-0.379168	2e-06	1.74287e-05
Cfap43	-0.379151	2e-06	1.74287e-05
1700064M15Rik	-0.379077	2e-06	1.74287e-05
Tcp11	-0.379051	2e-06	1.74287e-05
Tex12	0.37902	2e-06	1.74287e-05
Ift172	-0.378624	2e-06	1.74287e-05
Cxcr2	0.37849	2e-06	1.74287e-05
Irak1	0.37841	2e-06	1.74287e-05
Ssr4	0.378343	2e-06	1.74287e-05
1700017D01Rik	-0.378038	2e-06	1.74287e-05
Sfr1	0.377978	2e-06	1.74287e-05
Dnal4	-0.37796	2e-06	1.74287e-05
Cmtm2a	-0.377931	2e-06	1.74287e-05
Wbp11	-0.37785	2e-06	1.74287e-05
Rps29	0.37781	2e-06	1.74287e-05
Cycs	0.377716	2e-06	1.74287e-05
Cited1	0.377468	2e-06	1.74287e-05
Fbp1	-0.377467	2e-06	1.74287e-05
Oit1	-0.377188	2e-06	1.74287e-05
Ccdc24	-0.377042	2e-06	1.74287e-05
Nkapl	-0.376992	2e-06	1.74287e-05
Wdr20rt	-0.376919	2e-06	1.74287e-05
Tpr	0.37681	2e-06	1.74287e-05
Sh3gl3	-0.376804	2e-06	1.74287e-05
Ppp3r2	-0.376679	2e-06	1.74287e-05
Igbp1b	-0.376602	2e-06	1.74287e-05
Nphp1	-0.376188	2e-06	1.74287e-05
Rabepk	-0.376121	2e-06	1.74287e-05
1700026L06Rik	-0.376114	2e-06	1.74287e-05
Fth1	0.376005	2e-06	1.74287e-05
Sec14l1	-0.375968	2e-06	1.74287e-05
Gmfb	-0.375953	2e-06	1.74287e-05
1700008K24Rik	-0.375903	2e-06	1.74287e-05
Ubxn10	-0.375858	2e-06	1.74287e-05
Pnpla2	-0.375777	2e-06	1.74287e-05
Pgk2	-0.37577	2e-06	1.74287e-05
Ccdc173	-0.375741	2e-06	1.74287e-05
Rps21	0.375741	2e-06	1.74287e-05
1700019G24Rik	-0.375739	2e-06	1.74287e-05
Fhad1	-0.375613	2e-06	1.74287e-05
Akr1e1	-0.375262	2e-06	1.74287e-05
Lrrc34	-0.375246	2e-06	1.74287e-05
Slc16a7	-0.375174	2e-06	1.74287e-05
Hagh	-0.37465	2e-06	1.74287e-05
Rsph3a	-0.374582	2e-06	1.74287e-05
Cct6b	-0.374504	2e-06	1.74287e-05
Slc2a5	-0.374022	2e-06	1.74287e-05
Tekt2	-0.373563	2e-06	1.74287e-05
Ndufaf3	-0.373331	2e-06	1.74287e-05
Iqub	-0.373271	2e-06	1.74287e-05
Cyld	0.373177	2e-06	1.74287e-05
43164	0.372764	2e-06	1.74287e-05
Sumo2	0.372687	2e-06	1.74287e-05
Gm5142	-0.372639	2e-06	1.74287e-05
Hiat1	-0.372609	2e-06	1.74287e-05
Spata5	0.372531	2e-06	1.74287e-05
Sbds	-0.372367	2e-06	1.74287e-05
1700007G11Rik	-0.372279	2e-06	1.74287e-05
Tex22	-0.372257	2e-06	1.74287e-05
Tpgs2	0.372226	2e-06	1.74287e-05
Poll	-0.372213	2e-06	1.74287e-05
Ttc25	-0.372131	2e-06	1.74287e-05
Ybx3	-0.371968	2e-06	1.74287e-05
1700040L02Rik	-0.371923	2e-06	1.74287e-05
1700100I10Rik	-0.371358	2e-06	1.74287e-05
Dmrtb1	-0.371271	2e-06	1.74287e-05
Iqch	-0.371184	2e-06	1.74287e-05
Btbd16	-0.371042	2e-06	1.74287e-05
1700001C02Rik	-0.37095	2e-06	1.74287e-05
Smdt1	0.370896	2e-06	1.74287e-05
1700129C05Rik	-0.37088	2e-06	1.74287e-05
Cdk11b	0.37081	2e-06	1.74287e-05
Morn4	-0.37076	2e-06	1.74287e-05
Gm15645	0.370748	2e-06	1.74287e-05
Tbpl1	-0.3706	2e-06	1.74287e-05
Caprin2	0.370457	2e-06	1.74287e-05
4930503L19Rik	-0.370321	2e-06	1.74287e-05
Fkbpl	-0.370243	2e-06	1.74287e-05
1700042G15Rik	-0.370223	2e-06	1.74287e-05
Atp6ap1l	-0.370175	2e-06	1.74287e-05
Rps15a	0.370079	2e-06	1.74287e-05
Nlrp14	-0.370066	2e-06	1.74287e-05
Ttc12	-0.369599	2e-06	1.74287e-05
Gm1661	-0.369588	2e-06	1.74287e-05
Tmbim7	-0.369576	2e-06	1.74287e-05
Ccdc176	-0.369548	2e-06	1.74287e-05
Ntpcr	-0.369037	2e-06	1.74287e-05
Abcc3	-0.36898	2e-06	1.74287e-05
Thumpd3	-0.368975	2e-06	1.74287e-05
Tpi1	-0.368892	2e-06	1.74287e-05
Ubxn6	-0.368833	2e-06	1.74287e-05
Cox7b2	-0.368784	2e-06	1.74287e-05
1700001G11Rik	-0.368755	2e-06	1.74287e-05
Zmynd10	-0.368708	2e-06	1.74287e-05
Lrr1	0.368549	2e-06	1.74287e-05
Mroh2b	-0.368496	2e-06	1.74287e-05
4933409G03Rik	-0.368487	2e-06	1.74287e-05
Lancl2	-0.368244	2e-06	1.74287e-05
Ccnb2	-0.36819	2e-06	1.74287e-05
Dnah8	-0.368175	2e-06	1.74287e-05
Ntmt1	-0.368142	2e-06	1.74287e-05
Sgpl1	0.368094	2e-06	1.74287e-05
Dnajb14	-0.368052	2e-06	1.74287e-05
Wdfy1	-0.367925	2e-06	1.74287e-05
Mdh1b	-0.367872	2e-06	1.74287e-05
Myl10	-0.36758	2e-06	1.74287e-05
Vma21	0.36752	2e-06	1.74287e-05
Med9os	-0.367406	2e-06	1.74287e-05
Pacrg	-0.367347	2e-06	1.74287e-05
Gkap1	-0.367254	2e-06	1.74287e-05
Lrrc71	-0.367239	2e-06	1.74287e-05
Ugt8a	0.367213	2e-06	1.74287e-05
Eif1ax	0.367136	2e-06	1.74287e-05
Ccdc13	-0.367068	2e-06	1.74287e-05
Rab33b	0.36689	2e-06	1.74287e-05
Pdia4	0.366576	2e-06	1.74287e-05
Cptp	-0.366572	2e-06	1.74287e-05
Nsg1	-0.366549	2e-06	1.74287e-05
Ttc29	-0.366462	2e-06	1.74287e-05
Hunk	-0.366415	2e-06	1.74287e-05
Wfdc15a	-0.366174	2e-06	1.74287e-05
Dnajc5g	-0.365966	2e-06	1.74287e-05
Pom121l12	-0.365923	2e-06	1.74287e-05
D2Wsu81e	-0.365852	2e-06	1.74287e-05
Fam170a	-0.365845	2e-06	1.74287e-05
Smim14	-0.365693	2e-06	1.74287e-05
Dis3l	-0.365606	2e-06	1.74287e-05
2010109A12Rik	-0.365572	2e-06	1.74287e-05
Ppp3ca	-0.365512	2e-06	1.74287e-05
Rpl41	0.365483	2e-06	1.74287e-05
Scgb2b23-ps	-0.365335	2e-06	1.74287e-05
Rps24	0.364998	2e-06	1.74287e-05
Ssmem1	-0.364861	2e-06	1.74287e-05
Cyct	-0.364835	2e-06	1.74287e-05
Acot7	-0.364719	2e-06	1.74287e-05
Morf4l1	-0.364708	2e-06	1.74287e-05
Lamtor2	0.36441	2e-06	1.74287e-05
Armc3	-0.364356	2e-06	1.74287e-05
0610009L18Rik	-0.364329	2e-06	1.74287e-05
1700020N18Rik	-0.3642	2e-06	1.74287e-05
Pex11g	-0.364105	2e-06	1.74287e-05
Ankrd7	-0.364026	2e-06	1.74287e-05
Brip1os	0.364016	2e-06	1.74287e-05
Pgam2	-0.363928	2e-06	1.74287e-05
Nhp2l1	0.363808	2e-06	1.74287e-05
Sel1l2	-0.363783	2e-06	1.74287e-05
Pomgnt1	-0.363653	2e-06	1.74287e-05
Gmeb1	0.363257	2e-06	1.74287e-05
Ubxn11	-0.363132	2e-06	1.74287e-05
Edf1	-0.362989	2e-06	1.74287e-05
Hspa2	-0.362927	2e-06	1.74287e-05
Bcap31	0.362919	2e-06	1.74287e-05
Arf2	0.362779	2e-06	1.74287e-05
3110070M22Rik	-0.362704	2e-06	1.74287e-05
Rbm39	0.362681	2e-06	1.74287e-05
Rbakdn	-0.362641	2e-06	1.74287e-05
Lin7a	-0.362545	2e-06	1.74287e-05
Ccdc67	-0.362387	2e-06	1.74287e-05
Polr2k	0.362321	2e-06	1.74287e-05
Csl	-0.362319	2e-06	1.74287e-05
Penk	-0.361949	2e-06	1.74287e-05
2810025M15Rik	-0.361771	2e-06	1.74287e-05
1700017B05Rik	-0.361735	2e-06	1.74287e-05
1700030F18Rik	-0.36158	2e-06	1.74287e-05
1700019N19Rik	-0.361397	2e-06	1.74287e-05
Capns1	-0.361313	2e-06	1.74287e-05
D330050I16Rik	-0.361168	2e-06	1.74287e-05
Immp2l	-0.361166	2e-06	1.74287e-05
1700003H04Rik	-0.360895	2e-06	1.74287e-05
Mfge8	0.360763	2e-06	1.74287e-05
Cfap57	-0.360565	2e-06	1.74287e-05
Mycbpap	-0.360532	2e-06	1.74287e-05
Adam30	-0.360528	2e-06	1.74287e-05
1700011E24Rik	-0.36031	2e-06	1.74287e-05
Stk33	-0.360157	2e-06	1.74287e-05
Psmb4	0.360143	2e-06	1.74287e-05
Sf3b6	0.360091	2e-06	1.74287e-05
BC100451	-0.359795	2e-06	1.74287e-05
Iqcd	-0.35973	2e-06	1.74287e-05
G6pc3	-0.359715	2e-06	1.74287e-05
4930455B14Rik	-0.359412	2e-06	1.74287e-05
Tmem59	0.359387	2e-06	1.74287e-05
Dcp1b	-0.359111	2e-06	1.74287e-05
Ift43	-0.358958	2e-06	1.74287e-05
Khdrbs3	-0.358804	2e-06	1.74287e-05
Stamos	-0.358716	2e-06	1.74287e-05
Cst3	0.358665	2e-06	1.74287e-05
Ccdc96	-0.358102	2e-06	1.74287e-05
1700028J19Rik	-0.358095	2e-06	1.74287e-05
Amn1	-0.358068	2e-06	1.74287e-05
1700018A04Rik	-0.358041	2e-06	1.74287e-05
Hsf5	-0.358014	2e-06	1.74287e-05
Lca5l	-0.357947	2e-06	1.74287e-05
Camta1	0.357633	2e-06	1.74287e-05
Tcp10a	-0.357617	2e-06	1.74287e-05
Ggnbp1	-0.357591	2e-06	1.74287e-05
1700123L14Rik	-0.357294	2e-06	1.74287e-05
Mospd4	-0.357262	2e-06	1.74287e-05
Rrp1	-0.357181	2e-06	1.74287e-05
Spag8	-0.356953	2e-06	1.74287e-05
Rsph3b	-0.356929	2e-06	1.74287e-05
Svip	-0.356879	2e-06	1.74287e-05
Dnajc27	-0.356785	2e-06	1.74287e-05
Hspa8	0.356698	2e-06	1.74287e-05
Ccdc103	-0.356585	2e-06	1.74287e-05
Amz2	-0.356529	2e-06	1.74287e-05
Cflar	0.356512	2e-06	1.74287e-05
Rnaseh2a	-0.356507	2e-06	1.74287e-05
Dnajb4	-0.356459	2e-06	1.74287e-05
4930544G11Rik	-0.356458	2e-06	1.74287e-05
Smco2	-0.356418	2e-06	1.74287e-05
Zmynd12	-0.356381	2e-06	1.74287e-05
1700017N19Rik	-0.356355	2e-06	1.74287e-05
Fam107b	-0.356164	2e-06	1.74287e-05
1700029P11Rik	-0.355984	2e-06	1.74287e-05
Aurka	-0.35596	2e-06	1.74287e-05
Usp3	0.355946	2e-06	1.74287e-05
Tcp10c	-0.355909	2e-06	1.74287e-05
Lrrc6	-0.355879	2e-06	1.74287e-05
H2-T23	0.355647	2e-06	1.74287e-05
C8g	-0.355604	2e-06	1.74287e-05
Dpm2	-0.355569	2e-06	1.74287e-05
Adam32	-0.355561	2e-06	1.74287e-05
Rbp4	0.355444	2e-06	1.74287e-05
Ankrd60	-0.355318	2e-06	1.74287e-05
Ctps	0.355218	2e-06	1.74287e-05
Cgrrf1	-0.355209	2e-06	1.74287e-05
Tmem53	-0.355131	2e-06	1.74287e-05
Rpl19	0.355112	2e-06	1.74287e-05
Zpbp2	-0.355076	2e-06	1.74287e-05
Ilkap	0.354878	2e-06	1.74287e-05
Siah1b	0.354802	2e-06	1.74287e-05
Serf1	-0.354798	2e-06	1.74287e-05
Tescl	-0.354516	2e-06	1.74287e-05
Ftl1	0.354324	2e-06	1.74287e-05
Uimc1	0.354283	2e-06	1.74287e-05
Mak	-0.354186	2e-06	1.74287e-05
2810433D01Rik	0.354166	2e-06	1.74287e-05
Clspn	0.354105	2e-06	1.74287e-05
Dpcd	-0.3541	2e-06	1.74287e-05
Mok	-0.354028	2e-06	1.74287e-05
Itgae	-0.35388	2e-06	1.74287e-05
Prdx6b	-0.353674	2e-06	1.74287e-05
1110032A03Rik	-0.353643	2e-06	1.74287e-05
Aqp11	-0.353637	2e-06	1.74287e-05
Rps16	0.353484	2e-06	1.74287e-05
Sugt1	-0.353442	2e-06	1.74287e-05
Ddt	-0.353188	2e-06	1.74287e-05
Ruvbl2	-0.353133	2e-06	1.74287e-05
Lrrc9	-0.353097	2e-06	1.74287e-05
Gm10638	-0.353	2e-06	1.74287e-05
Fam188b	-0.352833	2e-06	1.74287e-05
Git1	-0.352806	2e-06	1.74287e-05
Dnah1	-0.35279	2e-06	1.74287e-05
Rpl35a	0.352705	2e-06	1.74287e-05
Zbbx	-0.35248	2e-06	1.74287e-05
Akirin2	-0.352468	2e-06	1.74287e-05
Spz1	-0.352466	2e-06	1.74287e-05
Eif2b3	0.352436	2e-06	1.74287e-05
Adam3	-0.352416	2e-06	1.74287e-05
Spag16	-0.352355	2e-06	1.74287e-05
Esf1	0.352166	2e-06	1.74287e-05
Ttll6	-0.352096	2e-06	1.74287e-05
Dpy19l2	-0.352079	2e-06	1.74287e-05
Ubb	-0.351998	2e-06	1.74287e-05
43355	-0.351906	2e-06	1.74287e-05
1700008J07Rik	-0.351856	2e-06	1.74287e-05
Ybx2	-0.351819	2e-06	1.74287e-05
Rae1	0.351799	2e-06	1.74287e-05
Dzip1	-0.351781	2e-06	1.74287e-05
Brms1	-0.351777	2e-06	1.74287e-05
Sirt7	0.351614	2e-06	1.74287e-05
Spef1	-0.351454	2e-06	1.74287e-05
Ribc2	-0.351378	2e-06	1.74287e-05
Kdm5a	0.35135	2e-06	1.74287e-05
Igfbp2	0.351314	2e-06	1.74287e-05
4933406F09Rik	-0.351131	2e-06	1.74287e-05
Actr1a	-0.350998	2e-06	1.74287e-05
1700019C18Rik	-0.350905	2e-06	1.74287e-05
Hspd1	0.350872	2e-06	1.74287e-05
Rab3ip	-0.350792	2e-06	1.74287e-05
Bpgm	-0.350579	2e-06	1.74287e-05
Fkbp7	-0.350447	2e-06	1.74287e-05
Ccdc36	0.350325	2e-06	1.74287e-05
1700108J01Rik	-0.350171	2e-06	1.74287e-05
Scand1	-0.35016	2e-06	1.74287e-05
Cep128	-0.350098	2e-06	1.74287e-05
1700030J22Rik	-0.35009	2e-06	1.74287e-05
Shcbp1l	-0.350027	2e-06	1.74287e-05
Armc9	-0.349982	2e-06	1.74287e-05
Tkfc	-0.349964	2e-06	1.74287e-05
Lmf1	-0.349798	2e-06	1.74287e-05
Dnali1	-0.349756	2e-06	1.74287e-05
Pfn4	-0.349705	2e-06	1.74287e-05
Polr2l	0.349695	2e-06	1.74287e-05
Acer3	0.349679	2e-06	1.74287e-05
6430531B16Rik	-0.349549	2e-06	1.74287e-05
Srpk2	-0.349509	2e-06	1.74287e-05
Dnajc19	0.349274	2e-06	1.74287e-05
Fxr1	-0.349157	2e-06	1.74287e-05
Grtp1	-0.348938	2e-06	1.74287e-05
Scamp1	-0.348652	2e-06	1.74287e-05
Als2cr11	-0.348572	2e-06	1.74287e-05
Ttc39d	-0.34851	2e-06	1.74287e-05
Ccdc130	-0.348368	2e-06	1.74287e-05
Fbxw10	-0.348124	2e-06	1.74287e-05
Ccdc30	-0.348059	2e-06	1.74287e-05
Xkrx	0.348047	2e-06	1.74287e-05
Dyrk3	-0.347819	2e-06	1.74287e-05
Serf2	0.347772	2e-06	1.74287e-05
Cfap70	-0.347568	2e-06	1.74287e-05
Izumo4	-0.347523	2e-06	1.74287e-05
Commd7	0.347491	2e-06	1.74287e-05
Ptchd3	-0.347465	2e-06	1.74287e-05
Elof1	-0.34745	2e-06	1.74287e-05
Isyna1	-0.347414	2e-06	1.74287e-05
Tcte2	-0.347392	2e-06	1.74287e-05
Usp4	-0.347251	2e-06	1.74287e-05
Rpl27a	0.34724	2e-06	1.74287e-05
Stx8	-0.347187	2e-06	1.74287e-05
Ahi1	-0.34718	2e-06	1.74287e-05
Ccdc83	-0.347145	2e-06	1.74287e-05
Atoh8	-0.347103	2e-06	1.74287e-05
Ap2b1	-0.3471	2e-06	1.74287e-05
Bscl2	-0.34697	2e-06	1.74287e-05
4932416H05Rik	-0.346797	2e-06	1.74287e-05
Kcnmb4os1	-0.346783	2e-06	1.74287e-05
4930444P10Rik	-0.346729	2e-06	1.74287e-05
1700020D05Rik	-0.346664	2e-06	1.74287e-05
Stk36	-0.34664	2e-06	1.74287e-05
Ybx1	-0.346545	2e-06	1.74287e-05
Sec22b	0.346513	2e-06	1.74287e-05
Mei1	0.34639	2e-06	1.74287e-05
Mroh8	-0.346301	2e-06	1.74287e-05
Fbxo30	-0.346255	2e-06	1.74287e-05
Flad1	-0.346224	2e-06	1.74287e-05
4933405L10Rik	-0.346214	2e-06	1.74287e-05
Kif5b	0.346116	2e-06	1.74287e-05
Lrriq1	-0.346077	2e-06	1.74287e-05
Slc22a16	-0.34606	2e-06	1.74287e-05
Slfn5	0.346004	2e-06	1.74287e-05
Bex2	0.345972	2e-06	1.74287e-05
4932412D23Rik	-0.345938	2e-06	1.74287e-05
4933427E11Rik	-0.345866	2e-06	1.74287e-05
Tmem217	-0.345843	2e-06	1.74287e-05
1700026D08Rik	-0.345815	2e-06	1.74287e-05
Mkrn1	-0.345671	2e-06	1.74287e-05
Armt1	-0.345517	2e-06	1.74287e-05
Rpl14	0.345389	2e-06	1.74287e-05
Aprt	-0.34529	2e-06	1.74287e-05
Dnajc15	-0.345128	2e-06	1.74287e-05
Efhd1	-0.345045	2e-06	1.74287e-05
Hrasls5	-0.345027	2e-06	1.74287e-05
Stk39	-0.34492	2e-06	1.74287e-05
Sepw1	-0.344892	2e-06	1.74287e-05
Sh2b3	-0.344738	2e-06	1.74287e-05
1810055G02Rik	-0.344556	2e-06	1.74287e-05
A630066F11Rik	-0.344489	2e-06	1.74287e-05
Tekt4	-0.344343	2e-06	1.74287e-05
Uqcrh	0.344251	2e-06	1.74287e-05
Pvrl3	-0.344193	2e-06	1.74287e-05
Rbpms2	0.344029	2e-06	1.74287e-05
Lrrc23	-0.344005	2e-06	1.74287e-05
Tmem8	-0.34372	2e-06	1.74287e-05
Atm	0.34372	2e-06	1.74287e-05
Enkd1	-0.343649	2e-06	1.74287e-05
Efcab6	-0.343481	2e-06	1.74287e-05
4930549G23Rik	-0.343419	2e-06	1.74287e-05
4933440M02Rik	-0.343408	2e-06	1.74287e-05
9230110C19Rik	-0.343223	2e-06	1.74287e-05
Cep89	-0.343183	2e-06	1.74287e-05
1700049L16Rik	-0.343081	2e-06	1.74287e-05
Gm5136	-0.342865	2e-06	1.74287e-05
Cklf	-0.342854	2e-06	1.74287e-05
Rfx4	-0.342814	2e-06	1.74287e-05
Ccdc38	-0.342761	2e-06	1.74287e-05
Ino80c	-0.342661	2e-06	1.74287e-05
Abca16	-0.342409	2e-06	1.74287e-05
Gm5797	-0.342255	2e-06	1.74287e-05
Optn	-0.342178	2e-06	1.74287e-05
Rgs22	-0.342156	2e-06	1.74287e-05
Lgals8	-0.342153	2e-06	1.74287e-05
Selk	0.342098	2e-06	1.74287e-05
Styxl1	-0.342065	2e-06	1.74287e-05
Cmtm2b	-0.341966	2e-06	1.74287e-05
Eif5b	0.341717	2e-06	1.74287e-05
Arpp19	0.341663	2e-06	1.74287e-05
Spata20	-0.341605	2e-06	1.74287e-05
Nol4l	-0.341586	2e-06	1.74287e-05
Wdr93	-0.341309	2e-06	1.74287e-05
Nudt4	-0.341214	2e-06	1.74287e-05
Atp5f1	0.34118	2e-06	1.74287e-05
Lsm5	0.341138	2e-06	1.74287e-05
Cdkl3	-0.340912	2e-06	1.74287e-05
1700065I16Rik	-0.340837	2e-06	1.74287e-05
Pkig	-0.340715	2e-06	1.74287e-05
1700003I22Rik	-0.340663	2e-06	1.74287e-05
Hspb9	-0.340377	2e-06	1.74287e-05
Pih1d2	-0.340347	2e-06	1.74287e-05
1810026B05Rik	-0.340303	2e-06	1.74287e-05
4933432K03Rik	-0.340291	2e-06	1.74287e-05
Stkld1	-0.340231	2e-06	1.74287e-05
Ndufa4l2	-0.340164	2e-06	1.74287e-05
Dcaf8	-0.340051	2e-06	1.74287e-05
4930444F02Rik	-0.339869	2e-06	1.74287e-05
Srbd1	0.339782	2e-06	1.74287e-05
Sun3	-0.339755	2e-06	1.74287e-05
Rai14	-0.339717	2e-06	1.74287e-05
Lrrc51	-0.33965	2e-06	1.74287e-05
Slc25a31	0.339472	2e-06	1.74287e-05
4930465K10Rik	-0.339353	2e-06	1.74287e-05
Igf2bp3	-0.339251	2e-06	1.74287e-05
Zkscan17	-0.339176	2e-06	1.74287e-05
Rdh11	-0.339138	2e-06	1.74287e-05
Lrrc43	-0.339003	2e-06	1.74287e-05
Cep19	-0.338881	2e-06	1.74287e-05
Rsph6a	-0.338826	2e-06	1.74287e-05
Syce1l	-0.338786	2e-06	1.74287e-05
Mocs3	-0.33875	2e-06	1.74287e-05
Dcaf12	-0.338695	2e-06	1.74287e-05
4931419H13Rik	-0.338675	2e-06	1.74287e-05
Mael	-0.338658	2e-06	1.74287e-05
1700029F12Rik	-0.338414	2e-06	1.74287e-05
Ttc16	-0.338408	2e-06	1.74287e-05
Ubald1	-0.338395	2e-06	1.74287e-05
Ptar1	-0.338361	2e-06	1.74287e-05
Sgms1	-0.338185	2e-06	1.74287e-05
Zbtb22	-0.338146	2e-06	1.74287e-05
Cd63	0.338069	2e-06	1.74287e-05
Ptpn20	-0.338002	2e-06	1.74287e-05
Fmr1	0.337962	2e-06	1.74287e-05
Rpl3	0.337934	2e-06	1.74287e-05
Lrrc56	-0.337893	2e-06	1.74287e-05
Agbl5	-0.337797	2e-06	1.74287e-05
Gm7444	-0.337793	2e-06	1.74287e-05
Tdrd6	-0.337701	2e-06	1.74287e-05
Zfp423	-0.33768	2e-06	1.74287e-05
Hccs	0.337517	2e-06	1.74287e-05
Gabarap	-0.337357	2e-06	1.74287e-05
Catsperd	-0.337316	2e-06	1.74287e-05
Hmgb2	0.337254	2e-06	1.74287e-05
Agfg1	-0.337248	2e-06	1.74287e-05
Gramd1c	-0.337246	2e-06	1.74287e-05
Cd300a	0.337202	2e-06	1.74287e-05
Pxt1	-0.33719	2e-06	1.74287e-05
Aldh3b1	-0.336971	2e-06	1.74287e-05
Ssr2	0.336675	2e-06	1.74287e-05
Ctsd	0.336569	2e-06	1.74287e-05
Rps27a	0.336505	2e-06	1.74287e-05
Hk1	-0.336291	2e-06	1.74287e-05
Cuta	0.336235	2e-06	1.74287e-05
Thap4	-0.336157	2e-06	1.74287e-05
Cox14	0.336098	2e-06	1.74287e-05
Saysd1	-0.336004	2e-06	1.74287e-05
43170	-0.335979	2e-06	1.74287e-05
Nanog	0.335972	2e-06	1.74287e-05
Rpl37a	0.335953	2e-06	1.74287e-05
4930522O17Rik	-0.335924	2e-06	1.74287e-05
Cenpf	0.335822	2e-06	1.74287e-05
Rexo2	-0.335821	2e-06	1.74287e-05
4932414N04Rik	-0.335739	2e-06	1.74287e-05
Txnl4b	-0.335736	2e-06	1.74287e-05
Tapbpl	0.335599	2e-06	1.74287e-05
Gsg1	-0.335553	2e-06	1.74287e-05
Crem	-0.335405	2e-06	1.74287e-05
Galnt3	-0.335277	2e-06	1.74287e-05
Wdtc1	-0.335246	2e-06	1.74287e-05
Dync2li1	-0.335174	2e-06	1.74287e-05
Tbrg1	-0.335153	2e-06	1.74287e-05
Gm7120	-0.334999	2e-06	1.74287e-05
Tomm22	-0.334963	2e-06	1.74287e-05
Gm5458	-0.334951	2e-06	1.74287e-05
Atg7	-0.334934	2e-06	1.74287e-05
Ifitm7	-0.33489	2e-06	1.74287e-05
Med21	0.334835	2e-06	1.74287e-05
Zc3h13	0.334486	2e-06	1.74287e-05
Brdt	-0.334458	2e-06	1.74287e-05
Hspe1	0.334456	2e-06	1.74287e-05
Rps5	0.334418	2e-06	1.74287e-05
Glipr1l1	-0.334373	2e-06	1.74287e-05
4930447C04Rik	0.334045	2e-06	1.74287e-05
Cfap53	-0.333983	2e-06	1.74287e-05
Crat	-0.333982	2e-06	1.74287e-05
Cep63	-0.333952	2e-06	1.74287e-05
Lekr1	-0.333844	2e-06	1.74287e-05
Dand5	-0.333844	2e-06	1.74287e-05
Ndufb10	-0.333832	2e-06	1.74287e-05
Pebp4	-0.333778	2e-06	1.74287e-05
Dgcr6	-0.333746	2e-06	1.74287e-05
Wdr12	-0.333491	2e-06	1.74287e-05
Ulk4	-0.333463	2e-06	1.74287e-05
Zpbp	-0.333425	2e-06	1.74287e-05
Rpl23a	0.333406	2e-06	1.74287e-05
Zfp35	-0.333298	2e-06	1.74287e-05
P4hb	0.333129	2e-06	1.74287e-05
Plaa	0.333115	2e-06	1.74287e-05
Rps3a1	0.333102	2e-06	1.74287e-05
Sphkap	-0.333006	2e-06	1.74287e-05
9530077C05Rik	-0.333004	2e-06	1.74287e-05
Ift122	-0.332856	2e-06	1.74287e-05
Arl4a	-0.332606	2e-06	1.74287e-05
Phospho2	-0.332592	2e-06	1.74287e-05
Nup85	0.332588	2e-06	1.74287e-05
Pbp2	-0.332488	2e-06	1.74287e-05
Ifnar1	0.332406	2e-06	1.74287e-05
Uba1y	0.332402	2e-06	1.74287e-05
Eno4	-0.332364	2e-06	1.74287e-05
Tiprl	-0.332343	2e-06	1.74287e-05
1700047M11Rik	-0.332294	2e-06	1.74287e-05
Adad1	-0.332291	2e-06	1.74287e-05
Nek2	-0.332181	2e-06	1.74287e-05
BC048502	-0.332181	2e-06	1.74287e-05
Drc1	-0.33199	2e-06	1.74287e-05
Tekt3	-0.331907	2e-06	1.74287e-05
Gnpat	-0.331798	2e-06	1.74287e-05
Aven	-0.331773	2e-06	1.74287e-05
Dgka	-0.331639	2e-06	1.74287e-05
Ankef1	-0.331438	2e-06	1.74287e-05
Zfp113	0.331166	2e-06	1.74287e-05
Tktl2	-0.331108	2e-06	1.74287e-05
Luc7l2	0.331048	2e-06	1.74287e-05
Dcun1d1	-0.330877	2e-06	1.74287e-05
Dnaaf3	-0.330837	2e-06	1.74287e-05
Tcp1	-0.330782	2e-06	1.74287e-05
Wnk1	0.330753	2e-06	1.74287e-05
43353	-0.330743	2e-06	1.74287e-05
Bad	-0.330709	2e-06	1.74287e-05
Fkbp3	0.33066	2e-06	1.74287e-05
Prss39	-0.330506	2e-06	1.74287e-05
Kif27	-0.330447	2e-06	1.74287e-05
Adk	0.330151	2e-06	1.74287e-05
Nxt1	-0.330034	2e-06	1.74287e-05
1700022H01Rik	-0.330028	2e-06	1.74287e-05
Mrpl39	-0.329932	2e-06	1.74287e-05
BC051628	-0.329898	2e-06	1.74287e-05
Rpl23	0.32983	2e-06	1.74287e-05
Prok2	-0.329775	2e-06	1.74287e-05
1700003G18Rik	-0.329658	2e-06	1.74287e-05
Adat3	-0.329606	2e-06	1.74287e-05
1700016K19Rik	-0.32957	2e-06	1.74287e-05
Reep4	-0.329475	2e-06	1.74287e-05
Map4k1	-0.3293	2e-06	1.74287e-05
Tcfl5	-0.329233	2e-06	1.74287e-05
Ccdc158	-0.329214	2e-06	1.74287e-05
Ccdc110	-0.329101	2e-06	1.74287e-05
Cnppd1	-0.329051	2e-06	1.74287e-05
Pla2g6	-0.329032	2e-06	1.74287e-05
4930404N11Rik	-0.329019	2e-06	1.74287e-05
Letm2	-0.329013	2e-06	1.74287e-05
Lrrc29	-0.328867	2e-06	1.74287e-05
Prss45	-0.328844	2e-06	1.74287e-05
Wdr62	-0.328834	2e-06	1.74287e-05
Tex2	-0.328686	2e-06	1.74287e-05
Capza1	-0.328666	2e-06	1.74287e-05
Fam76a	-0.328585	2e-06	1.74287e-05
2300009A05Rik	-0.328463	2e-06	1.74287e-05
Rimbp3	-0.328351	2e-06	1.74287e-05
Ak1	-0.328085	2e-06	1.74287e-05
Pcsk1n	0.328062	2e-06	1.74287e-05
Lrrc36	-0.327999	2e-06	1.74287e-05
Mageb4	0.327999	2e-06	1.74287e-05
Xkr8	-0.327972	2e-06	1.74287e-05
Zfp316	0.327957	2e-06	1.74287e-05
Ccdc146	-0.32781	2e-06	1.74287e-05
Tktl1	0.327672	2e-06	1.74287e-05
Rpl12	0.32757	2e-06	1.74287e-05
Gnptg	0.327565	2e-06	1.74287e-05
BC049730	-0.32751	2e-06	1.74287e-05
Papolb	-0.327414	2e-06	1.74287e-05
Stk38l	0.327228	2e-06	1.74287e-05
Ak7	-0.327176	2e-06	1.74287e-05
Isca1	-0.327157	2e-06	1.74287e-05
Dclre1c	0.327096	2e-06	1.74287e-05
Syngr1	0.327058	2e-06	1.74287e-05
Gpatch2	-0.327056	2e-06	1.74287e-05
Krba1	-0.326961	2e-06	1.74287e-05
Dnajb1	-0.32696	2e-06	1.74287e-05
Drc7	-0.326908	2e-06	1.74287e-05
Atxn3	-0.326877	2e-06	1.74287e-05
Chrne	-0.3268	2e-06	1.74287e-05
Ttc30a2	-0.326657	2e-06	1.74287e-05
Ica1l	-0.32662	2e-06	1.74287e-05
Ddit3	-0.326011	2e-06	1.74287e-05
1700025F22Rik	-0.325986	2e-06	1.74287e-05
1700067G17Rik	-0.325967	2e-06	1.74287e-05
Cfap52	-0.325876	2e-06	1.74287e-05
1700051A21Rik	-0.32574	2e-06	1.74287e-05
Nme8	-0.325654	2e-06	1.74287e-05
Laptm4a	-0.325601	2e-06	1.74287e-05
Gal3st1	0.325593	2e-06	1.74287e-05
Slc30a3	-0.325526	2e-06	1.74287e-05
Nmd3	0.325521	2e-06	1.74287e-05
Qrich2	-0.325462	2e-06	1.74287e-05
Tuba3b	-0.325324	2e-06	1.74287e-05
Psen1	-0.325264	2e-06	1.74287e-05
Arhgdia	0.325053	2e-06	1.74287e-05
Cd55b	-0.324946	2e-06	1.74287e-05
Dnal1	-0.324893	2e-06	1.74287e-05
Mrpl42	0.324821	2e-06	1.74287e-05
Gaa	0.324651	2e-06	1.74287e-05
Zfyve21	0.324539	2e-06	1.74287e-05
Mapk6	-0.324474	2e-06	1.74287e-05
Frs3os	-0.32438	2e-06	1.74287e-05
Kpna6	-0.324323	2e-06	1.74287e-05
1700039E15Rik	-0.324301	2e-06	1.74287e-05
Gtf2i	-0.324278	2e-06	1.74287e-05
Atp5s	-0.324244	2e-06	1.74287e-05
Mul1	-0.324118	2e-06	1.74287e-05
Mt1	-0.324114	2e-06	1.74287e-05
Pilra	0.324039	2e-06	1.74287e-05
Psma8	-0.32387	2e-06	1.74287e-05
Emc8	0.323852	2e-06	1.74287e-05
Tapbp	-0.323784	2e-06	1.74287e-05
Tma7	-0.323725	2e-06	1.74287e-05
Rpl4	0.323488	2e-06	1.74287e-05
Trim69	-0.323486	2e-06	1.74287e-05
Rpl35	0.323282	2e-06	1.74287e-05
Gm16287	0.323189	2e-06	1.74287e-05
Stk10	-0.323085	2e-06	1.74287e-05
Orc6	0.323073	2e-06	1.74287e-05
Cfap97	-0.323051	2e-06	1.74287e-05
4933401H06Rik	-0.323029	2e-06	1.74287e-05
Ndufa7	-0.322983	2e-06	1.74287e-05
1700065L07Rik	-0.322938	2e-06	1.74287e-05
Rhbdd3	-0.322907	2e-06	1.74287e-05
Dhrs1	-0.322863	2e-06	1.74287e-05
Atat1	-0.322798	2e-06	1.74287e-05
4930488L21Rik	-0.322756	2e-06	1.74287e-05
4930567K20Rik	-0.322616	2e-06	1.74287e-05
1700034J05Rik	-0.32254	2e-06	1.74287e-05
4930550C14Rik	-0.32247	2e-06	1.74287e-05
Katnal1	-0.322329	2e-06	1.74287e-05
Mprip	-0.322293	2e-06	1.74287e-05
Polr2h	0.32226	2e-06	1.74287e-05
Fdft1	-0.32192	2e-06	1.74287e-05
Rpa3	0.321715	2e-06	1.74287e-05
Lcp2	-0.321685	2e-06	1.74287e-05
Rpain	0.321457	2e-06	1.74287e-05
Mphosph8	0.321423	2e-06	1.74287e-05
Tbl1xr1	-0.321388	2e-06	1.74287e-05
Ubl7	-0.321381	2e-06	1.74287e-05
Egln2	-0.32131	2e-06	1.74287e-05
Paqr8	-0.32129	2e-06	1.74287e-05
Ccdc180	-0.321212	2e-06	1.74287e-05
Slc2a3	-0.321196	2e-06	1.74287e-05
Dnah7b	-0.321177	2e-06	1.74287e-05
Esx1	0.320854	2e-06	1.74287e-05
Chd6	0.320803	2e-06	1.74287e-05
Ppm1d	-0.320771	2e-06	1.74287e-05
Pdzd9	-0.320721	2e-06	1.74287e-05
Tmem50b	-0.320629	2e-06	1.74287e-05
Arfgap3	-0.320604	2e-06	1.74287e-05
Polb	-0.320467	2e-06	1.74287e-05
Tyr	0.320426	2e-06	1.74287e-05
Ccdc62	-0.320249	2e-06	1.74287e-05
1810044D09Rik	-0.320224	2e-06	1.74287e-05
Tcp10b	-0.320071	2e-06	1.74287e-05
Spata6	-0.319964	2e-06	1.74287e-05
Rps11	0.319926	2e-06	1.74287e-05
Slc3a2	0.319905	2e-06	1.74287e-05
Cdc45	0.319887	2e-06	1.74287e-05
Hoxa4	-0.319864	2e-06	1.74287e-05
Dnah7a	-0.31981	2e-06	1.74287e-05
Agpat6	-0.319794	2e-06	1.74287e-05
1700102P08Rik	-0.31975	2e-06	1.74287e-05
Xlr4c	0.319629	2e-06	1.74287e-05
Tgif1	-0.319597	2e-06	1.74287e-05
BC051142	-0.319492	2e-06	1.74287e-05
4933427D14Rik	-0.319396	2e-06	1.74287e-05
Cntrl	0.319295	2e-06	1.74287e-05
Nudt9	-0.319262	2e-06	1.74287e-05
Atg9a	-0.319251	2e-06	1.74287e-05
Kdm4d	-0.31898	2e-06	1.74287e-05
1700066M21Rik	-0.318938	2e-06	1.74287e-05
Ddx19b	-0.318923	2e-06	1.74287e-05
Bbs5	-0.318897	2e-06	1.74287e-05
Cmpk1	0.318855	2e-06	1.74287e-05
Vimp	-0.318717	2e-06	1.74287e-05
Slc23a1	0.318455	2e-06	1.74287e-05
Eif2s3y	0.318397	2e-06	1.74287e-05
Mapre3	-0.318385	2e-06	1.74287e-05
Mcm3	0.318316	2e-06	1.74287e-05
Cep72	-0.318241	2e-06	1.74287e-05
Mapk8ip2	-0.318202	2e-06	1.74287e-05
Peli2	-0.318193	2e-06	1.74287e-05
Ammecr1l	-0.318162	2e-06	1.74287e-05
1700023F02Rik	-0.318084	2e-06	1.74287e-05
1700026D11Rik	-0.318004	2e-06	1.74287e-05
Bspry	-0.317972	2e-06	1.74287e-05
Xlr4a	0.317935	2e-06	1.74287e-05
Fam186b	-0.31793	2e-06	1.74287e-05
D16Ertd472e	-0.317897	2e-06	1.74287e-05
Wdhd1	0.317472	2e-06	1.74287e-05
Asf1b	0.317441	2e-06	1.74287e-05
Ipo4	-0.317388	2e-06	1.74287e-05
Tssk1	-0.317334	2e-06	1.74287e-05
Nupl2	-0.316978	2e-06	1.74287e-05
Bin3	-0.3168	2e-06	1.74287e-05
Map10	-0.3167	2e-06	1.74287e-05
1700046C09Rik	-0.316469	2e-06	1.74287e-05
Spata1	-0.316467	2e-06	1.74287e-05
Lrrc48	-0.316457	2e-06	1.74287e-05
Trpd52l3	-0.316452	2e-06	1.74287e-05
Ankrd42	-0.316388	2e-06	1.74287e-05
Siah2	-0.316339	2e-06	1.74287e-05
Cbx7	-0.316313	2e-06	1.74287e-05
Pcmt1	-0.316287	2e-06	1.74287e-05
Glrx3	-0.315951	2e-06	1.74287e-05
Ndst4	-0.315892	2e-06	1.74287e-05
Rmi2	0.315722	2e-06	1.74287e-05
Gabarapl1	-0.315716	2e-06	1.74287e-05
Pik3ip1	-0.315496	2e-06	1.74287e-05
Capsl	-0.315465	2e-06	1.74287e-05
1700016G22Rik	-0.315389	2e-06	1.74287e-05
Catsper2	-0.315343	2e-06	1.74287e-05
Abhd4	-0.315209	2e-06	1.74287e-05
Dusp18	-0.315183	2e-06	1.74287e-05
Tesk1	-0.315168	2e-06	1.74287e-05
Psmc2	-0.315155	2e-06	1.74287e-05
0610010K14Rik	0.315123	2e-06	1.74287e-05
1700010K23Rik	-0.315123	2e-06	1.74287e-05
Mrps17	0.315084	2e-06	1.74287e-05
Trap1a	0.314942	2e-06	1.74287e-05
4921524L21Rik	-0.314787	2e-06	1.74287e-05
Zmynd11	-0.314647	2e-06	1.74287e-05
4921536K21Rik	-0.314585	2e-06	1.74287e-05
Bag5	-0.314548	2e-06	1.74287e-05
Spata18	-0.314371	2e-06	1.74287e-05
Ccdc181	-0.314327	2e-06	1.74287e-05
Ankar	-0.314312	2e-06	1.74287e-05
Cct7	-0.314284	2e-06	1.74287e-05
Ccdc42	-0.31428	2e-06	1.74287e-05
Itgb3bp	-0.314278	2e-06	1.74287e-05
Top2a	0.314183	2e-06	1.74287e-05
Rfx5	-0.314138	2e-06	1.74287e-05
Atp5g2	0.314129	2e-06	1.74287e-05
Txnrd3	-0.314063	2e-06	1.74287e-05
Rps15a-ps6	0.31406	2e-06	1.74287e-05
Pgd	0.313935	2e-06	1.74287e-05
Nop9	-0.313926	2e-06	1.74287e-05
Ccdc184	-0.31386	2e-06	1.74287e-05
Exosc3	-0.313671	2e-06	1.74287e-05
Suclg1	-0.313639	2e-06	1.74287e-05
Rpa2	0.313629	2e-06	1.74287e-05
Rbks	-0.313412	2e-06	1.74287e-05
Iqcg	-0.313373	2e-06	1.74287e-05
9530082P21Rik	-0.313338	2e-06	1.74287e-05
Lrrc63	-0.313255	2e-06	1.74287e-05
Crnde	-0.313169	2e-06	1.74287e-05
Lpcat3	-0.313146	2e-06	1.74287e-05
Cers3	-0.313053	2e-06	1.74287e-05
Pex13	-0.312887	2e-06	1.74287e-05
Vamp3	0.312758	2e-06	1.74287e-05
1700012P22Rik	-0.312735	2e-06	1.74287e-05
Gstt2	-0.312683	2e-06	1.74287e-05
Ppp1ca	0.312652	2e-06	1.74287e-05
Cln6	-0.312625	2e-06	1.74287e-05
Elfn2	-0.312621	2e-06	1.74287e-05
Upf3a	-0.312583	2e-06	1.74287e-05
Catsperg1	-0.312581	2e-06	1.74287e-05
H2-K1	0.312438	2e-06	1.74287e-05
Dctn2	-0.312353	2e-06	1.74287e-05
C530008M17Rik	-0.312261	2e-06	1.74287e-05
Cops5	-0.312184	2e-06	1.74287e-05
1700028I16Rik	-0.3121	2e-06	1.74287e-05
Eid2b	-0.312051	2e-06	1.74287e-05
1700116B05Rik	-0.311959	2e-06	1.74287e-05
Mesdc2	-0.311948	2e-06	1.74287e-05
Cebpg	-0.311893	2e-06	1.74287e-05
Rwdd2a	-0.311821	2e-06	1.74287e-05
1700037C18Rik	-0.311776	2e-06	1.74287e-05
Agbl4	-0.31177	2e-06	1.74287e-05
Psmf1	-0.311692	2e-06	1.74287e-05
Rcbtb2	-0.311676	2e-06	1.74287e-05
Bpi	-0.311555	2e-06	1.74287e-05
Prss46	-0.311504	2e-06	1.74287e-05
Cenpn	-0.311333	2e-06	1.74287e-05
Mcts2	-0.311299	2e-06	1.74287e-05
Tomm20l	-0.311103	2e-06	1.74287e-05
Vdac2	-0.311103	2e-06	1.74287e-05
Gorasp2	-0.311042	2e-06	1.74287e-05
Kbtbd11	-0.310997	2e-06	1.74287e-05
Rasl2-9	-0.310962	2e-06	1.74287e-05
Smim8	-0.310827	2e-06	1.74287e-05
4921511H03Rik	-0.310752	2e-06	1.74287e-05
Ascc2	-0.310632	2e-06	1.74287e-05
Msi2	-0.310448	2e-06	1.74287e-05
Rpgrip1	-0.310416	2e-06	1.74287e-05
Ppp1cc	-0.31036	2e-06	1.74287e-05
Alx1	-0.31034	2e-06	1.74287e-05
Ccdc7a	-0.310322	2e-06	1.74287e-05
4930556M19Rik	-0.310303	2e-06	1.74287e-05
Dnajb12	-0.31028	2e-06	1.74287e-05
Ccdc7b	-0.310267	2e-06	1.74287e-05
4933427D06Rik	0.310195	2e-06	1.74287e-05
Kif23	0.310193	2e-06	1.74287e-05
Mrps16	0.310057	2e-06	1.74287e-05
Irak3	-0.309994	2e-06	1.74287e-05
Tcam1	-0.30986	2e-06	1.74287e-05
Pmf1	0.309817	2e-06	1.74287e-05
Wdr48	-0.309813	2e-06	1.74287e-05
Cpt1c	-0.309805	2e-06	1.74287e-05
1700026F02Rik	-0.309767	2e-06	1.74287e-05
Xlr	0.309741	2e-06	1.74287e-05
Snx1	-0.309704	2e-06	1.74287e-05
Zfp110	-0.309681	2e-06	1.74287e-05
Ints10	-0.309458	2e-06	1.74287e-05
Swt1	0.309389	2e-06	1.74287e-05
Tor4a	0.309351	2e-06	1.74287e-05
Gm11992	-0.309302	2e-06	1.74287e-05
Ccdc39	-0.309149	2e-06	1.74287e-05
Ggn	-0.309103	2e-06	1.74287e-05
Agtpbp1	-0.309103	2e-06	1.74287e-05
Fam45a	-0.309011	2e-06	1.74287e-05
Mthfsd	-0.308868	2e-06	1.74287e-05
Gfra4	-0.308775	2e-06	1.74287e-05
1110020A21Rik	-0.308752	2e-06	1.74287e-05
4931423N10Rik	-0.308705	2e-06	1.74287e-05
Fbxo44	-0.308698	2e-06	1.74287e-05
Tekt5	-0.308613	2e-06	1.74287e-05
Dhtkd1	-0.308527	2e-06	1.74287e-05
Stpg2	-0.308453	2e-06	1.74287e-05
Triqk	-0.308407	2e-06	1.74287e-05
Btg1	-0.308373	2e-06	1.74287e-05
Dgkeos	-0.308299	2e-06	1.74287e-05
Ccdc105	-0.308272	2e-06	1.74287e-05
Ankfy1	0.308199	2e-06	1.74287e-05
Cdc42ep3	-0.308178	2e-06	1.74287e-05
Gm6455	-0.308169	2e-06	1.74287e-05
4931440F15Rik	-0.308157	2e-06	1.74287e-05
Sms	0.308067	2e-06	1.74287e-05
4930539J05Rik	-0.308012	2e-06	1.74287e-05
Ccdc87	-0.307988	2e-06	1.74287e-05
Sycp1	0.30793	2e-06	1.74287e-05
Fam50a	0.307902	2e-06	1.74287e-05
Maats1	-0.307864	2e-06	1.74287e-05
4931429I11Rik	-0.307677	2e-06	1.74287e-05
Pcsk4	-0.307642	2e-06	1.74287e-05
E130317F20Rik	-0.307625	2e-06	1.74287e-05
Art5	-0.307625	2e-06	1.74287e-05
Wdr27	-0.307624	2e-06	1.74287e-05
Nupr1l	-0.307605	2e-06	1.74287e-05
Ranbp17	-0.307584	2e-06	1.74287e-05
Comp	-0.307541	2e-06	1.74287e-05
Nudt19	0.307516	2e-06	1.74287e-05
Ppm1b	-0.307292	2e-06	1.74287e-05
1700001J03Rik	-0.307206	2e-06	1.74287e-05
Arsa	-0.307173	2e-06	1.74287e-05
Gal3st3	-0.307171	2e-06	1.74287e-05
Tulp2	-0.307159	2e-06	1.74287e-05
Fzr1	-0.307082	2e-06	1.74287e-05
Rps18	0.307059	2e-06	1.74287e-05
1700001J11Rik	-0.307055	2e-06	1.74287e-05
Llph	0.3069	2e-06	1.74287e-05
1700110K17Rik	-0.306853	2e-06	1.74287e-05
Kiz	-0.306852	2e-06	1.74287e-05
Rnf20	0.30682	2e-06	1.74287e-05
Mettl22	-0.306785	2e-06	1.74287e-05
Wdr63	-0.306751	2e-06	1.74287e-05
Sox30	-0.3067	2e-06	1.74287e-05
4930430A15Rik	-0.306525	2e-06	1.74287e-05
Fam184a	-0.306509	2e-06	1.74287e-05
Dnaic1	-0.306389	2e-06	1.74287e-05
Kif3b	-0.306383	2e-06	1.74287e-05
Lgsn	-0.30635	2e-06	1.74287e-05
Pde1a	-0.306245	2e-06	1.74287e-05
Oxsm	-0.306023	2e-06	1.74287e-05
Hydin	-0.305977	2e-06	1.74287e-05
1700008O03Rik	-0.305936	2e-06	1.74287e-05
Lamtor1	0.30563	2e-06	1.74287e-05
Mpv17l	0.305508	2e-06	1.74287e-05
Atp5e	0.305475	2e-06	1.74287e-05
Efcab2	-0.30542	2e-06	1.74287e-05
Iqcb1	0.305365	2e-06	1.74287e-05
Dcun1d4	-0.305358	2e-06	1.74287e-05
Xlr5a	0.305331	2e-06	1.74287e-05
Sgca	-0.305236	2e-06	1.74287e-05
Parp11	-0.30515	2e-06	1.74287e-05
Tlk2	-0.305068	2e-06	1.74287e-05
Kat8	-0.305041	2e-06	1.74287e-05
AV051173	-0.304812	2e-06	1.74287e-05
Fam89b	-0.30476	2e-06	1.74287e-05
Ccer1	-0.304754	2e-06	1.74287e-05
Iqck	-0.304745	2e-06	1.74287e-05
Mum1	-0.304477	2e-06	1.74287e-05
Zc2hc1c	-0.304412	2e-06	1.74287e-05
Gapdh	0.30438	2e-06	1.74287e-05
Dcaf7	-0.30422	2e-06	1.74287e-05
Ccdc108	-0.304178	2e-06	1.74287e-05
Spc24	0.304098	2e-06	1.74287e-05
Got1l1	-0.304086	2e-06	1.74287e-05
D130020L05Rik	-0.303975	2e-06	1.74287e-05
Tctn2	-0.303972	2e-06	1.74287e-05
Nubp2	-0.303945	2e-06	1.74287e-05
Exosc5	-0.30386	2e-06	1.74287e-05
Rnls	-0.303812	2e-06	1.74287e-05
Asb1	-0.303795	2e-06	1.74287e-05
Kat7	-0.303745	2e-06	1.74287e-05
Copb2	0.303743	2e-06	1.74287e-05
Snrnp40	0.303677	2e-06	1.74287e-05
Keap1	-0.303577	2e-06	1.74287e-05
Fem1c	-0.303483	2e-06	1.74287e-05
Acbd6	-0.303473	2e-06	1.74287e-05
Vit	-0.30336	2e-06	1.74287e-05
Slain2	-0.303096	2e-06	1.74287e-05
Lig3	-0.30309	2e-06	1.74287e-05
Adam18	-0.303089	2e-06	1.74287e-05
Osbpl1a	-0.302999	2e-06	1.74287e-05
2700094K13Rik	0.302978	2e-06	1.74287e-05
Zfp518a	0.302834	2e-06	1.74287e-05
Naa50	0.302707	2e-06	1.74287e-05
Sox6	-0.302564	2e-06	1.74287e-05
Phpt1	-0.302543	2e-06	1.74287e-05
Cdc5l	0.302534	2e-06	1.74287e-05
Xlr5b	0.302518	2e-06	1.74287e-05
9330159M07Rik	-0.302448	2e-06	1.74287e-05
Dusp19	-0.302375	2e-06	1.74287e-05
Pole4	0.302354	2e-06	1.74287e-05
Tmem206	0.302184	2e-06	1.74287e-05
Stag1	0.302128	2e-06	1.74287e-05
Prdx4	0.30211	2e-06	1.74287e-05
Mat2a	0.302038	2e-06	1.74287e-05
Ip6k1	-0.301971	2e-06	1.74287e-05
Fcgr3	-0.30197	2e-06	1.74287e-05
Tymp	-0.301939	2e-06	1.74287e-05
1700018F24Rik	-0.301911	2e-06	1.74287e-05
Piwil1	-0.301894	2e-06	1.74287e-05
Atad5	0.301861	2e-06	1.74287e-05
Ttc26	-0.301697	2e-06	1.74287e-05
Snrpd1	0.301667	2e-06	1.74287e-05
Ttc23	-0.301563	2e-06	1.74287e-05
2700049A03Rik	-0.301349	2e-06	1.74287e-05
Fam228a	-0.301283	2e-06	1.74287e-05
Mipep	-0.301255	2e-06	1.74287e-05
Ifi30	0.301044	2e-06	1.74287e-05
1700007L15Rik	-0.301017	2e-06	1.74287e-05
Syngr4	-0.300969	2e-06	1.74287e-05
Xaf1	0.300918	2e-06	1.74287e-05
Zpr1	-0.300817	2e-06	1.74287e-05
Ndufa3	0.300778	2e-06	1.74287e-05
4930558J18Rik	-0.30058	2e-06	1.74287e-05
Zmynd15	-0.300531	2e-06	1.74287e-05
Catsperg2	-0.300389	2e-06	1.74287e-05
1700006A11Rik	-0.300381	2e-06	1.74287e-05
Gm4763	-0.300338	2e-06	1.74287e-05
Thnsl1	-0.300271	2e-06	1.74287e-05
Dhfr	0.300189	2e-06	1.74287e-05
Spc25	0.300178	2e-06	1.74287e-05
BC030499	-0.300118	2e-06	1.74287e-05
Ccdc163	-0.300095	2e-06	1.74287e-05
Samd8	-0.300005	2e-06	1.74287e-05
Arrdc3	-0.299917	2e-06	1.74287e-05
Polr1d	-0.2999	2e-06	1.74287e-05
Top1	0.299803	2e-06	1.74287e-05
Dnah17	-0.299757	2e-06	1.74287e-05
Tmem231	-0.299751	2e-06	1.74287e-05
4933424G06Rik	-0.299632	2e-06	1.74287e-05
Rcor3	-0.299594	2e-06	1.74287e-05
Hook2	-0.29952	2e-06	1.74287e-05
Zswim2	-0.299381	2e-06	1.74287e-05
Fam161a	-0.299378	2e-06	1.74287e-05
Fkbp6	0.299265	2e-06	1.74287e-05
Trim11	-0.299176	2e-06	1.74287e-05
Pomt1	-0.299146	2e-06	1.74287e-05
Ppp1r35	-0.299047	2e-06	1.74287e-05
Dpf3	-0.299023	2e-06	1.74287e-05
Abhd17b	-0.298961	2e-06	1.74287e-05
Ciz1	-0.298774	2e-06	1.74287e-05
Nsf	0.298766	2e-06	1.74287e-05
A830080D01Rik	0.298761	2e-06	1.74287e-05
Dyrk1b	-0.298744	2e-06	1.74287e-05
Speer2	-0.29871	2e-06	1.74287e-05
Setdb2	0.298679	2e-06	1.74287e-05
BC022687	-0.298558	2e-06	1.74287e-05
Cfap221	-0.298393	2e-06	1.74287e-05
Psmc3ip	-0.298377	2e-06	1.74287e-05
Dpysl5	-0.298134	2e-06	1.74287e-05
Memo1	-0.298015	2e-06	1.74287e-05
Ngfrap1	0.297975	2e-06	1.74287e-05
Mif4gd	-0.297833	2e-06	1.74287e-05
Shroom3	-0.297708	2e-06	1.74287e-05
Uqcrq	-0.297637	2e-06	1.74287e-05
Zfp105	-0.297609	2e-06	1.74287e-05
Cdca3	-0.2974	2e-06	1.74287e-05
Cnih4	0.297332	2e-06	1.74287e-05
Samd15	-0.297246	2e-06	1.74287e-05
2310045N01Rik	-0.297237	2e-06	1.74287e-05
Zswim1	-0.297077	2e-06	1.74287e-05
Cchcr1	-0.29705	2e-06	1.74287e-05
Rpl17	0.297042	2e-06	1.74287e-05
Rars	0.297024	2e-06	1.74287e-05
Mpc2	-0.297002	2e-06	1.74287e-05
Creb3l4	-0.296982	2e-06	1.74287e-05
H3f3b	0.296951	2e-06	1.74287e-05
Magoh	0.296927	2e-06	1.74287e-05
Spata7	-0.296775	2e-06	1.74287e-05
Cfap44	-0.296728	2e-06	1.74287e-05
Hint2	0.296628	2e-06	1.74287e-05
Ccdc151	-0.296614	2e-06	1.74287e-05
Tbcc	-0.296597	2e-06	1.74287e-05
Nmnat3	-0.296475	2e-06	1.74287e-05
1700001L19Rik	-0.296421	2e-06	1.74287e-05
Cep83os	-0.296354	2e-06	1.74287e-05
Jade3	0.29629	2e-06	1.74287e-05
Minos1	0.296213	2e-06	1.74287e-05
Ift27	-0.296042	2e-06	1.74287e-05
Hmga2	-0.295969	2e-06	1.74287e-05
Ppig	0.295915	2e-06	1.74287e-05
Ttc21b	-0.295884	2e-06	1.74287e-05
Btbd1	-0.295882	2e-06	1.74287e-05
Tex21	-0.29576	2e-06	1.74287e-05
Tdrd1	-0.295643	2e-06	1.74287e-05
4930513N10Rik	-0.295574	2e-06	1.74287e-05
Gnb2l1	0.295531	2e-06	1.74287e-05
Zbtb3	-0.2955	2e-06	1.74287e-05
Hist1h2bp	-0.295465	2e-06	1.74287e-05
Fam78a	-0.295435	2e-06	1.74287e-05
Rnf125	-0.295405	2e-06	1.74287e-05
Atad2	0.29539	2e-06	1.74287e-05
Arl8b	-0.295278	2e-06	1.74287e-05
Trpm7	0.295152	2e-06	1.74287e-05
Vps28	-0.295101	2e-06	1.74287e-05
Fyttd1	-0.295009	2e-06	1.74287e-05
Ccdc25	0.294877	2e-06	1.74287e-05
Bola1	-0.294801	2e-06	1.74287e-05
Gm4871	-0.294776	2e-06	1.74287e-05
Gpr62	-0.294768	2e-06	1.74287e-05
Fyb	-0.294752	2e-06	1.74287e-05
Taf1	0.294742	2e-06	1.74287e-05
Tmem115	-0.294606	2e-06	1.74287e-05
1700012D01Rik	-0.294602	2e-06	1.74287e-05
Rps23	0.294599	2e-06	1.74287e-05
Rpl7a	0.294447	2e-06	1.74287e-05
Timm8a2	-0.294377	2e-06	1.74287e-05
Srp9	-0.294363	2e-06	1.74287e-05
1700019B03Rik	-0.294351	2e-06	1.74287e-05
Fbxw2	0.294294	2e-06	1.74287e-05
Rps10	0.294251	2e-06	1.74287e-05
Ctsf	0.294126	2e-06	1.74287e-05
Thoc7	-0.294099	2e-06	1.74287e-05
Scap	0.294089	2e-06	1.74287e-05
Amdhd2	-0.294034	2e-06	1.74287e-05
Slc39a8	-0.29391	2e-06	1.74287e-05
Acat2	0.293908	2e-06	1.74287e-05
Poc1b	-0.293903	2e-06	1.74287e-05
Hoxd3os1	-0.293893	2e-06	1.74287e-05
Tmem39b	-0.293893	2e-06	1.74287e-05
Pabpc6	-0.29384	2e-06	1.74287e-05
Cyb5r3	0.293741	2e-06	1.74287e-05
Cs	0.293715	2e-06	1.74287e-05
Sgsm3	0.293679	2e-06	1.74287e-05
Rassf1	-0.293664	2e-06	1.74287e-05
Ccna1	-0.293656	2e-06	1.74287e-05
Rfx8	-0.293513	2e-06	1.74287e-05
Slc4a8	-0.293472	2e-06	1.74287e-05
Ctnna1	0.293279	2e-06	1.74287e-05
l7Rn6	0.293103	2e-06	1.74287e-05
Atl1	-0.293043	2e-06	1.74287e-05
Lrrc73	-0.29291	2e-06	1.74287e-05
Saxo2	-0.29287	2e-06	1.74287e-05
Rsrc2	0.292794	2e-06	1.74287e-05
Map7	-0.292784	2e-06	1.74287e-05
4933402J10Rik	-0.292564	2e-06	1.74287e-05
Efhb	-0.292451	2e-06	1.74287e-05
Sdr39u1	-0.292436	2e-06	1.74287e-05
Pax9	-0.292358	2e-06	1.74287e-05
Actl7a	-0.29231	2e-06	1.74287e-05
Timm22	0.292291	2e-06	1.74287e-05
Asnsd1	-0.292216	2e-06	1.74287e-05
Osbp2	-0.292182	2e-06	1.74287e-05
Ghrl	-0.292094	2e-06	1.74287e-05
Lrrfip2	-0.292093	2e-06	1.74287e-05
1700057G04Rik	-0.291909	2e-06	1.74287e-05
Tmem225	-0.291861	2e-06	1.74287e-05
Klhl24	-0.291785	2e-06	1.74287e-05
Slx4	-0.291784	2e-06	1.74287e-05
Mbnl3	0.291711	2e-06	1.74287e-05
Mapk10	-0.291546	2e-06	1.74287e-05
Ero1lb	-0.291506	2e-06	1.74287e-05
Particl	-0.29147	2e-06	1.74287e-05
Gm6194	-0.291437	2e-06	1.74287e-05
Naglu	-0.291401	2e-06	1.74287e-05
Ift57	-0.291365	2e-06	1.74287e-05
Tpd52l2	0.291344	2e-06	1.74287e-05
Ngly1	-0.291329	2e-06	1.74287e-05
Cep57	-0.291309	2e-06	1.74287e-05
Nelfb	0.291287	2e-06	1.74287e-05
Gnao1	-0.291257	2e-06	1.74287e-05
Tubb4b	-0.291244	2e-06	1.74287e-05
Hif1a	0.291178	2e-06	1.74287e-05
Gm5860	-0.291173	2e-06	1.74287e-05
Hps4	-0.291052	2e-06	1.74287e-05
Ccdc178	-0.291024	2e-06	1.74287e-05
4930593A02Rik	-0.290961	2e-06	1.74287e-05
1700018L02Rik	-0.290771	2e-06	1.74287e-05
Gng5	0.290748	2e-06	1.74287e-05
AV039307	-0.290745	2e-06	1.74287e-05
Gmpr2	-0.29074	2e-06	1.74287e-05
Prosc	-0.290737	2e-06	1.74287e-05
Lman1	0.290716	2e-06	1.74287e-05
Prss21	-0.290708	2e-06	1.74287e-05
Nudt17	0.290648	2e-06	1.74287e-05
Slc9c1	-0.290633	2e-06	1.74287e-05
Slc1a2	-0.290619	2e-06	1.74287e-05
Selm	0.290604	2e-06	1.74287e-05
Hipk3	-0.290587	2e-06	1.74287e-05
Ppp1r10	-0.290422	2e-06	1.74287e-05
Aldh3b2	-0.29037	2e-06	1.74287e-05
Mfap5	-0.290369	2e-06	1.74287e-05
Malat1	0.290272	2e-06	1.74287e-05
Tfrc	0.290252	2e-06	1.74287e-05
Coro1c	0.290201	2e-06	1.74287e-05
Mrs2	-0.290171	2e-06	1.74287e-05
6820408C15Rik	-0.290073	2e-06	1.74287e-05
Dcaf5	-0.290053	2e-06	1.74287e-05
Ppp1r2	-0.289603	2e-06	1.74287e-05
Dhps	0.289431	2e-06	1.74287e-05
Pde4dip	-0.289393	2e-06	1.74287e-05
Klhdc9	-0.289385	2e-06	1.74287e-05
Atxn2l	-0.289314	2e-06	1.74287e-05
Pdk2	-0.289313	2e-06	1.74287e-05
Arrdc5	-0.289227	2e-06	1.74287e-05
Grin2d	-0.289221	2e-06	1.74287e-05
Mmachc	-0.289037	2e-06	1.74287e-05
Zfp689	-0.289036	2e-06	1.74287e-05
Fam131a	-0.289004	2e-06	1.74287e-05
Lsm8	0.288924	2e-06	1.74287e-05
Alg13	0.288918	2e-06	1.74287e-05
Plekhn1	-0.288859	2e-06	1.74287e-05
Tmem199	0.288753	2e-06	1.74287e-05
Baz2b	-0.288686	2e-06	1.74287e-05
Ecsit	0.288676	2e-06	1.74287e-05
Cpn1	-0.288646	2e-06	1.74287e-05
Entpd1	-0.288355	2e-06	1.74287e-05
Desi1	-0.288081	2e-06	1.74287e-05
Fbxw27	-0.288057	2e-06	1.74287e-05
Rpl6	0.288055	2e-06	1.74287e-05
Tprn	-0.288015	2e-06	1.74287e-05
Cep70	-0.288013	2e-06	1.74287e-05
Psme4	-0.287924	2e-06	1.74287e-05
Wdr53	-0.287878	2e-06	1.74287e-05
Ndfip1	-0.28782	2e-06	1.74287e-05
Ttll5	-0.287813	2e-06	1.74287e-05
Mki67	0.287522	2e-06	1.74287e-05
Tmem69	0.287496	2e-06	1.74287e-05
Ccdc116	-0.287486	2e-06	1.74287e-05
Aimp2	0.28748	2e-06	1.74287e-05
Pigc	-0.28741	2e-06	1.74287e-05
Tdrd7	-0.28737	2e-06	1.74287e-05
Cdc42	0.287254	2e-06	1.74287e-05
Pias1	-0.287225	2e-06	1.74287e-05
Abcc12	-0.287034	2e-06	1.74287e-05
Cstf1	-0.286981	2e-06	1.74287e-05
Srsf6	0.286754	2e-06	1.74287e-05
Ccdc150	-0.286702	2e-06	1.74287e-05
Tmem242	-0.286684	2e-06	1.74287e-05
Mesp1	-0.286643	2e-06	1.74287e-05
Tada3	-0.286608	2e-06	1.74287e-05
Trappc9	-0.286579	2e-06	1.74287e-05
Cops4	-0.286564	2e-06	1.74287e-05
Psmc6	0.286515	2e-06	1.74287e-05
Npat	0.286385	2e-06	1.74287e-05
Sptlc2	0.286378	2e-06	1.74287e-05
Spaca1	-0.286249	2e-06	1.74287e-05
Rbm12b1	-0.286201	2e-06	1.74287e-05
Gtsf1l	-0.286133	2e-06	1.74287e-05
Ppp2cb	-0.286129	2e-06	1.74287e-05
Banf1	0.286119	2e-06	1.74287e-05
Rundc3a	-0.286104	2e-06	1.74287e-05
Gstt3	-0.286086	2e-06	1.74287e-05
Ybey	0.285974	2e-06	1.74287e-05
Nop56	0.285846	2e-06	1.74287e-05
Rabl2	-0.285748	2e-06	1.74287e-05
Chmp2b	-0.285666	2e-06	1.74287e-05
Sec62	0.28561	2e-06	1.74287e-05
Nt5dc1	-0.285585	2e-06	1.74287e-05
Hmces	0.285571	2e-06	1.74287e-05
Fkbp4	-0.285562	2e-06	1.74287e-05
Xrcc6	0.285556	2e-06	1.74287e-05
Cds1	-0.285424	2e-06	1.74287e-05
Clhc1	-0.285382	2e-06	1.74287e-05
Art3	-0.285335	2e-06	1.74287e-05
Ncbp1	-0.285235	2e-06	1.74287e-05
Tmbim4	-0.285144	2e-06	1.74287e-05
Cox7a2	-0.284984	2e-06	1.74287e-05
Pnma1	-0.28497	2e-06	1.74287e-05
Ak2	-0.284925	2e-06	1.74287e-05
Myl12a	0.284921	2e-06	1.74287e-05
Pdrg1	0.284865	2e-06	1.74287e-05
Ralgps1	-0.284822	2e-06	1.74287e-05
Phf1	-0.284804	2e-06	1.74287e-05
Mff	-0.284718	2e-06	1.74287e-05
Klhdc2	-0.284695	2e-06	1.74287e-05
Coa4	-0.284655	2e-06	1.74287e-05
Pdap1	0.28465	2e-06	1.74287e-05
Tdrd9	-0.284592	2e-06	1.74287e-05
Rnps1	0.284569	2e-06	1.74287e-05
1700101I11Rik	-0.284452	2e-06	1.74287e-05
1700001G01Rik	-0.284345	2e-06	1.74287e-05
Huwe1	0.284292	2e-06	1.74287e-05
Gm5148	0.284264	2e-06	1.74287e-05
Apitd1	0.28424	2e-06	1.74287e-05
Inpp5k	-0.284231	2e-06	1.74287e-05
Sltm	-0.284205	2e-06	1.74287e-05
Snrpe	0.284142	2e-06	1.74287e-05
Zc3h10	-0.284062	2e-06	1.74287e-05
Ddost	0.284029	2e-06	1.74287e-05
Aurkc	-0.284024	2e-06	1.74287e-05
Lrriq4	-0.284006	2e-06	1.74287e-05
Ppap2a	-0.283992	2e-06	1.74287e-05
Thegl	-0.283935	2e-06	1.74287e-05
Armc4	-0.283904	2e-06	1.74287e-05
Slco6d1	-0.283881	2e-06	1.74287e-05
Pdlim5	0.283779	2e-06	1.74287e-05
Oat	0.283737	2e-06	1.74287e-05
Mag	-0.283675	2e-06	1.74287e-05
Gm6981	-0.283662	2e-06	1.74287e-05
Rnf19a	-0.283658	2e-06	1.74287e-05
Spats1	-0.283626	2e-06	1.74287e-05
Dcaf17	0.283556	2e-06	1.74287e-05
Qdpr	0.283316	2e-06	1.74287e-05
Elovl2	-0.283143	2e-06	1.74287e-05
Fmn1	-0.283065	2e-06	1.74287e-05
Ostf1	0.283041	2e-06	1.74287e-05
4930474M22Rik	-0.28302	2e-06	1.74287e-05
Ankrd12	0.282949	2e-06	1.74287e-05
Eif1	-0.282876	2e-06	1.74287e-05
Rpl37	0.282718	2e-06	1.74287e-05
Man2b2	-0.282647	2e-06	1.74287e-05
Ing1	-0.282609	2e-06	1.74287e-05
1700015E13Rik	-0.282599	2e-06	1.74287e-05
AI464131	-0.282595	2e-06	1.74287e-05
Znrf4	-0.282478	2e-06	1.74287e-05
Atp6v0d1	0.282477	2e-06	1.74287e-05
4930451G09Rik	-0.282399	2e-06	1.74287e-05
Rbbp8	0.282222	2e-06	1.74287e-05
Nol7	0.282192	2e-06	1.74287e-05
Dydc1	-0.282059	2e-06	1.74287e-05
Angel1	-0.281888	2e-06	1.74287e-05
Wwc2	-0.281859	2e-06	1.74287e-05
4930442J19Rik	-0.281784	2e-06	1.74287e-05
Deb1	0.281771	2e-06	1.74287e-05
Sppl2b	-0.281624	2e-06	1.74287e-05
Ttc21a	-0.281479	2e-06	1.74287e-05
Htatip2	-0.2814	2e-06	1.74287e-05
Arid4b	0.281363	2e-06	1.74287e-05
Otub2	-0.281299	2e-06	1.74287e-05
AI987944	-0.281222	2e-06	1.74287e-05
Scamp2	-0.281206	2e-06	1.74287e-05
Chuk	0.281165	2e-06	1.74287e-05
Kcmf1	-0.281104	2e-06	1.74287e-05
Usp46	-0.281026	2e-06	1.74287e-05
Bcl11a	-0.280754	2e-06	1.74287e-05
Fam20a	-0.280749	2e-06	1.74287e-05
Rps7	0.280714	2e-06	1.74287e-05
Usp44	-0.280697	2e-06	1.74287e-05
Pom121l2	-0.280615	2e-06	1.74287e-05
Lsm3	0.28061	2e-06	1.74287e-05
Zfp654	-0.280596	2e-06	1.74287e-05
BC048644	-0.280579	2e-06	1.74287e-05
Cd47	0.280559	2e-06	1.74287e-05
Srpk1	-0.280515	2e-06	1.74287e-05
0610009O20Rik	-0.28039	2e-06	1.74287e-05
Adcy10	-0.280374	2e-06	1.74287e-05
Isca2	-0.280327	2e-06	1.74287e-05
Dynlt1b	-0.280301	2e-06	1.74287e-05
Slc35d2	0.280239	2e-06	1.74287e-05
Trim43b	0.280161	2e-06	1.74287e-05
Cep57l1	-0.280111	2e-06	1.74287e-05
Zbtb32	-0.280107	2e-06	1.74287e-05
Dxo	0.28007	2e-06	1.74287e-05
4933431G14Rik	-0.279962	2e-06	1.74287e-05
Ttbk1	-0.279923	2e-06	1.74287e-05
Me1	-0.279868	2e-06	1.74287e-05
Akr1a1	0.279866	2e-06	1.74287e-05
Ehbp1l1	-0.279844	2e-06	1.74287e-05
Ranbp9	-0.279688	2e-06	1.74287e-05
Fam181a	-0.279626	2e-06	1.74287e-05
Msl1	-0.279607	2e-06	1.74287e-05
Ubtd1	-0.279601	2e-06	1.74287e-05
Ccdc144b	-0.279593	2e-06	1.74287e-05
Bub3	-0.279468	2e-06	1.74287e-05
Cap2	-0.279389	2e-06	1.74287e-05
Rpl5	0.279277	2e-06	1.74287e-05
Fam209	-0.27927	2e-06	1.74287e-05
Arc	-0.27923	2e-06	1.74287e-05
Ovol2	-0.279083	2e-06	1.74287e-05
Ccdc74a	-0.278977	2e-06	1.74287e-05
Ehd1	-0.278952	2e-06	1.74287e-05
Rtn1	-0.278912	2e-06	1.74287e-05
Ube2l3	-0.278908	2e-06	1.74287e-05
Catsperb	-0.278906	2e-06	1.74287e-05
Txlng	0.278774	2e-06	1.74287e-05
Pcgf6	-0.278755	2e-06	1.74287e-05
1700030O20Rik	-0.278569	2e-06	1.74287e-05
Topors	-0.278552	2e-06	1.74287e-05
Rbm8a	0.278379	2e-06	1.74287e-05
Cpeb1	0.278293	2e-06	1.74287e-05
Mtch2	-0.278287	2e-06	1.74287e-05
LOC102634401	-0.278235	2e-06	1.74287e-05
Gmppa	-0.278218	2e-06	1.74287e-05
Gtf2h2	0.278129	2e-06	1.74287e-05
Papola	0.278077	2e-06	1.74287e-05
Hmgcr	-0.277957	2e-06	1.74287e-05
4933416C03Rik	-0.277922	2e-06	1.74287e-05
Tmem80	-0.277812	2e-06	1.74287e-05
1700025F24Rik	-0.277788	2e-06	1.74287e-05
Gm15881	-0.277676	2e-06	1.74287e-05
Sec1	-0.277659	2e-06	1.74287e-05
D1Pas1	-0.277603	2e-06	1.74287e-05
Akap12	-0.277549	2e-06	1.74287e-05
Zmiz2	-0.277548	2e-06	1.74287e-05
Lef1	-0.277528	2e-06	1.74287e-05
Dyx1c1	-0.277418	2e-06	1.74287e-05
AY702103	-0.277268	2e-06	1.74287e-05
Stx12	0.277222	2e-06	1.74287e-05
Idh3g	0.277197	2e-06	1.74287e-05
Tfdp2	0.277152	2e-06	1.74287e-05
Abhd17a	-0.277127	2e-06	1.74287e-05
Gm7008	-0.276952	2e-06	1.74287e-05
Sec23b	0.276921	2e-06	1.74287e-05
Ahsa2	-0.276895	2e-06	1.74287e-05
Med26	-0.276655	2e-06	1.74287e-05
Stard10	-0.276638	2e-06	1.74287e-05
Plec	-0.276526	2e-06	1.74287e-05
Rnf38	-0.276335	2e-06	1.74287e-05
Blmh	0.276264	2e-06	1.74287e-05
Tmem30c	-0.276257	2e-06	1.74287e-05
Arpc1a	0.276183	2e-06	1.74287e-05
Prss40	-0.276158	2e-06	1.74287e-05
Zscan12	-0.276046	2e-06	1.74287e-05
Serpinb6a	-0.276022	2e-06	1.74287e-05
Trank1	0.275997	2e-06	1.74287e-05
Tmem202	-0.275915	2e-06	1.74287e-05
Slc41a3	-0.275792	2e-06	1.74287e-05
Msl3l2	-0.275788	2e-06	1.74287e-05
Nup93	0.2757	2e-06	1.74287e-05
Fbxo21	0.275679	2e-06	1.74287e-05
Ube2k	0.275654	2e-06	1.74287e-05
Eif6	0.275631	2e-06	1.74287e-05
Atp6v1f	-0.275601	2e-06	1.74287e-05
4933400L20Rik	-0.275569	2e-06	1.74287e-05
C8b	-0.275313	2e-06	1.74287e-05
Prss44	-0.275306	2e-06	1.74287e-05
BC049715	-0.275119	2e-06	1.74287e-05
Kpna2	-0.275085	2e-06	1.74287e-05
Ube2e3	0.27504	2e-06	1.74287e-05
Trim27	-0.274887	2e-06	1.74287e-05
Gm3893	-0.274813	2e-06	1.74287e-05
Zfp688	-0.274796	2e-06	1.74287e-05
Creg1	0.274781	2e-06	1.74287e-05
Dnajb6	-0.274733	2e-06	1.74287e-05
Fbxo5	0.274727	2e-06	1.74287e-05
Dync1li2	-0.274685	2e-06	1.74287e-05
Spatc1l	-0.274671	2e-06	1.74287e-05
Cyp2e1	0.274644	2e-06	1.74287e-05
Acp1	-0.274642	2e-06	1.74287e-05
Cdkl1	-0.274608	2e-06	1.74287e-05
Limd1	-0.274527	2e-06	1.74287e-05
Mea1	-0.274429	2e-06	1.74287e-05
Prrc2c	0.274336	2e-06	1.74287e-05
Kmt2e	0.274128	2e-06	1.74287e-05
Ado	-0.274085	2e-06	1.74287e-05
4930570G19Rik	-0.274007	2e-06	1.74287e-05
Kdm3a	-0.273993	2e-06	1.74287e-05
Rpl15	0.273956	2e-06	1.74287e-05
Med9	-0.273886	2e-06	1.74287e-05
Mrps7	0.273878	2e-06	1.74287e-05
Prom1	-0.273785	2e-06	1.74287e-05
Trmt10a	-0.273717	2e-06	1.74287e-05
Yy2	0.273599	2e-06	1.74287e-05
Hoxd8	-0.273578	2e-06	1.74287e-05
Frat2	-0.273454	2e-06	1.74287e-05
Pdzph1	-0.27341	2e-06	1.74287e-05
Rmdn2	-0.273385	2e-06	1.74287e-05
Cep164	-0.273375	2e-06	1.74287e-05
H2afy	-0.273319	2e-06	1.74287e-05
Daw1	-0.273298	2e-06	1.74287e-05
1110051M20Rik	-0.273205	2e-06	1.74287e-05
Ptges3l	-0.273118	2e-06	1.74287e-05
Cox6b1	0.273067	2e-06	1.74287e-05
Lepr	0.273067	2e-06	1.74287e-05
Nfyc	0.272992	2e-06	1.74287e-05
Ppp4r1	-0.272946	2e-06	1.74287e-05
Casc1	-0.272897	2e-06	1.74287e-05
Ttll7	-0.27267	2e-06	1.74287e-05
Hspb6	-0.272646	2e-06	1.74287e-05
Slc25a2	-0.272474	2e-06	1.74287e-05
Gm8267	-0.272469	2e-06	1.74287e-05
Agbl2	-0.272454	2e-06	1.74287e-05
Dbi	0.27239	2e-06	1.74287e-05
Sssca1	-0.272204	2e-06	1.74287e-05
Pfdn1	-0.272148	2e-06	1.74287e-05
Uba6	0.272124	2e-06	1.74287e-05
Btg4	-0.271994	2e-06	1.74287e-05
1700030K09Rik	-0.271945	2e-06	1.74287e-05
Psmb2	0.271941	2e-06	1.74287e-05
Cep104	-0.271807	2e-06	1.74287e-05
Tcf25	0.271617	2e-06	1.74287e-05
2310039H08Rik	-0.271501	2e-06	1.74287e-05
Gstt4	-0.271343	2e-06	1.74287e-05
Dedd	-0.271287	2e-06	1.74287e-05
Zfp37	-0.271269	2e-06	1.74287e-05
Sra1	-0.271252	2e-06	1.74287e-05
1700028P15Rik	-0.271219	2e-06	1.74287e-05
Dlat	-0.271207	2e-06	1.74287e-05
Lmbr1l	-0.271174	2e-06	1.74287e-05
Spsb3	-0.27111	2e-06	1.74287e-05
Rp9	-0.271094	2e-06	1.74287e-05
Med24	-0.271025	2e-06	1.74287e-05
Meikin	-0.270996	2e-06	1.74287e-05
Rps8	0.270946	2e-06	1.74287e-05
Ncapg2	0.270936	2e-06	1.74287e-05
1700009C05Rik	-0.270756	2e-06	1.74287e-05
Gpr137	-0.270606	2e-06	1.74287e-05
Rrp1b	0.270548	2e-06	1.74287e-05
Mrps18b	-0.270451	2e-06	1.74287e-05
Mcm2	0.270334	2e-06	1.74287e-05
Cep350	-0.270274	2e-06	1.74287e-05
Tchp	-0.270267	2e-06	1.74287e-05
Vbp1	0.27019	2e-06	1.74287e-05
Tmem67	-0.270186	2e-06	1.74287e-05
1700024G13Rik	-0.270133	2e-06	1.74287e-05
Zc3h15	0.270102	2e-06	1.74287e-05
4930483J18Rik	-0.269991	2e-06	1.74287e-05
Fem1b	-0.269957	2e-06	1.74287e-05
Lca5	-0.269922	2e-06	1.74287e-05
Fam92a	-0.269775	2e-06	1.74287e-05
Bcas1	-0.269625	2e-06	1.74287e-05
Ankrd13a	-0.269612	2e-06	1.74287e-05
Leo1	-0.269263	2e-06	1.74287e-05
Ulk2	-0.269251	2e-06	1.74287e-05
4921531P14Rik	-0.269198	2e-06	1.74287e-05
Pbx3	0.269053	2e-06	1.74287e-05
4930528D03Rik	-0.269038	2e-06	1.74287e-05
1700036G14Rik	-0.268962	2e-06	1.74287e-05
Cdkl4	-0.268882	2e-06	1.74287e-05
Fam46c	-0.268744	2e-06	1.74287e-05
Ube3b	-0.268741	2e-06	1.74287e-05
Ube2s	-0.268686	2e-06	1.74287e-05
Caprin1	-0.268669	2e-06	1.74287e-05
Dnajc5b	-0.268654	2e-06	1.74287e-05
Ebpl	0.268634	2e-06	1.74287e-05
Spag1	-0.268545	2e-06	1.74287e-05
Ckap4	-0.268462	2e-06	1.74287e-05
Akap3	-0.268287	2e-06	1.74287e-05
Coil	-0.268282	2e-06	1.74287e-05
Mrpl17	0.268274	2e-06	1.74287e-05
Atp1b2	0.268089	2e-06	1.74287e-05
Kbtbd6	-0.268058	2e-06	1.74287e-05
Sell	-0.26804	2e-06	1.74287e-05
1700001L05Rik	-0.267916	2e-06	1.74287e-05
Mospd1	-0.267879	2e-06	1.74287e-05
Msrb3	-0.267801	2e-06	1.74287e-05
Nrip3	0.267756	2e-06	1.74287e-05
Aifm2	-0.267742	2e-06	1.74287e-05
Gsdmcl-ps	-0.267715	2e-06	1.74287e-05
Bag6	-0.267701	2e-06	1.74287e-05
Pfkp	-0.267674	2e-06	1.74287e-05
Stap2	-0.267609	2e-06	1.74287e-05
Akap13	0.267503	2e-06	1.74287e-05
Rnf25	-0.267431	2e-06	1.74287e-05
LOC100505025	-0.26737	2e-06	1.74287e-05
Snx16	0.267328	2e-06	1.74287e-05
Fam217a	-0.267156	2e-06	1.74287e-05
Nadk2	-0.267095	2e-06	1.74287e-05
Poteg	-0.267004	2e-06	1.74287e-05
Klhdc1	-0.266949	2e-06	1.74287e-05
4932438H23Rik	-0.266929	2e-06	1.74287e-05
Las1l	0.2668	2e-06	1.74287e-05
Dnah6	-0.266779	2e-06	1.74287e-05
Grk4	-0.266669	2e-06	1.74287e-05
Fam120b	-0.266665	2e-06	1.74287e-05
Tmed2	0.266594	2e-06	1.74287e-05
Mum1l1	0.266567	2e-06	1.74287e-05
Defb19	0.266501	2e-06	1.74287e-05
Cul1	0.266458	2e-06	1.74287e-05
Smim13	-0.26645	2e-06	1.74287e-05
Ash2l	-0.266364	2e-06	1.74287e-05
Col16a1	-0.266359	2e-06	1.74287e-05
Wdr78	-0.266299	2e-06	1.74287e-05
Gpaa1	0.266283	2e-06	1.74287e-05
Cndp2	-0.266258	2e-06	1.74287e-05
Eno1b	-0.266229	2e-06	1.74287e-05
Fam183b	-0.26617	2e-06	1.74287e-05
Fam227b	-0.266144	2e-06	1.74287e-05
Derl1	-0.266038	2e-06	1.74287e-05
Alas1	-0.265991	2e-06	1.74287e-05
Zdhhc12	-0.265982	2e-06	1.74287e-05
Ap1m1	-0.26592	2e-06	1.74287e-05
Morn1	-0.265822	2e-06	1.74287e-05
Nup35	-0.265727	2e-06	1.74287e-05
Acyp2	-0.265665	2e-06	1.74287e-05
Lrrc49	-0.265659	2e-06	1.74287e-05
Slco6c1	-0.265642	2e-06	1.74287e-05
Mfsd11	0.265596	2e-06	1.74287e-05
Toporsl	-0.265472	2e-06	1.74287e-05
Rps26	0.265454	2e-06	1.74287e-05
Tex101	0.265419	2e-06	1.74287e-05
Gm5861	-0.265398	2e-06	1.74287e-05
Bnip3	0.265312	2e-06	1.74287e-05
Pmm2	-0.265239	2e-06	1.74287e-05
Prkag1	0.265192	2e-06	1.74287e-05
Hist1h2af	0.265188	2e-06	1.74287e-05
Fbxl13	-0.265051	2e-06	1.74287e-05
Ift140	-0.264961	2e-06	1.74287e-05
Slbp	0.264903	2e-06	1.74287e-05
BC037704	-0.264873	2e-06	1.74287e-05
Rd3	-0.264771	2e-06	1.74287e-05
Dusp13	-0.264738	2e-06	1.74287e-05
Eif3c	0.264492	2e-06	1.74287e-05
Herc6	-0.264487	2e-06	1.74287e-05
Lrp2bp	-0.264432	2e-06	1.74287e-05
Lgals1	0.264269	2e-06	1.74287e-05
Ltv1	0.26422	2e-06	1.74287e-05
Yif1a	-0.264212	2e-06	1.74287e-05
Calm1	-0.263989	2e-06	1.74287e-05
Spag5	-0.263977	2e-06	1.74287e-05
1700012C14Rik	-0.263939	2e-06	1.74287e-05
Dhrs11	-0.263923	2e-06	1.74287e-05
Flywch1	-0.263878	2e-06	1.74287e-05
Traf3ip1	-0.263715	2e-06	1.74287e-05
Psmd9	-0.263708	2e-06	1.74287e-05
Tmem219	-0.263648	2e-06	1.74287e-05
Cetn3	-0.263418	2e-06	1.74287e-05
Artn	-0.263255	2e-06	1.74287e-05
Uck2	-0.263131	2e-06	1.74287e-05
Dym	-0.263036	2e-06	1.74287e-05
Atxn7l3b	-0.263031	2e-06	1.74287e-05
Atxn7l1	-0.26296	2e-06	1.74287e-05
Pacrgl	-0.262933	2e-06	1.74287e-05
Atp6v0a2	-0.262892	2e-06	1.74287e-05
Zfp438	-0.262884	2e-06	1.74287e-05
Plxdc1	-0.262779	2e-06	1.74287e-05
Aste1	-0.262777	2e-06	1.74287e-05
Ndufaf2	-0.262675	2e-06	1.74287e-05
Yod1	-0.262672	2e-06	1.74287e-05
Ftmt	-0.262504	2e-06	1.74287e-05
Ascc1	-0.262458	2e-06	1.74287e-05
Urb2	-0.262377	2e-06	1.74287e-05
Mterf3	-0.262355	2e-06	1.74287e-05
Clp1	-0.262275	2e-06	1.74287e-05
Odf1	-0.262268	2e-06	1.74287e-05
Fam221b	-0.262156	2e-06	1.74287e-05
Inca1	0.262078	2e-06	1.74287e-05
4930520O04Rik	-0.261979	2e-06	1.74287e-05
Hipk1	-0.261948	2e-06	1.74287e-05
Rb1cc1	-0.261922	2e-06	1.74287e-05
Speer1	-0.261898	2e-06	1.74287e-05
Pxmp2	0.261869	2e-06	1.74287e-05
Atg5	0.261761	2e-06	1.74287e-05
Igsf11	-0.261696	2e-06	1.74287e-05
4930553E22Rik	-0.261661	2e-06	1.74287e-05
Zfp706	0.261632	2e-06	1.74287e-05
LOC666331	-0.261535	2e-06	1.74287e-05
Rpl22l1	-0.261426	2e-06	1.74287e-05
Pcbp3	-0.261402	2e-06	1.74287e-05
Sil1	-0.261363	2e-06	1.74287e-05
Rab23	-0.261335	2e-06	1.74287e-05
4930547E14Rik	-0.261198	2e-06	1.74287e-05
Frmd8	-0.261198	2e-06	1.74287e-05
Stx2	-0.261051	2e-06	1.74287e-05
Dnajb11	0.261049	2e-06	1.74287e-05
Rsph14	-0.26103	2e-06	1.74287e-05
Ccdc33	-0.261017	2e-06	1.74287e-05
Fam229a	-0.26098	2e-06	1.74287e-05
Adam1b	-0.260964	2e-06	1.74287e-05
Mxra8	-0.260939	2e-06	1.74287e-05
Cadm1	0.260843	2e-06	1.74287e-05
Cinp	0.260799	2e-06	1.74287e-05
Brk1	0.260784	2e-06	1.74287e-05
Tsks	-0.260631	2e-06	1.74287e-05
Rps2	0.260548	2e-06	1.74287e-05
Nfx1	0.260517	2e-06	1.74287e-05
1700125G22Rik	-0.260473	2e-06	1.74287e-05
3830406C13Rik	-0.260417	2e-06	1.74287e-05
Tmppe	0.26034	2e-06	1.74287e-05
Nup210l	-0.260278	2e-06	1.74287e-05
Gm15107	0.260207	2e-06	1.74287e-05
Uchl1	0.260172	2e-06	1.74287e-05
Faah	-0.260108	2e-06	1.74287e-05
Ctbp2	-0.260077	2e-06	1.74287e-05
Fsip1	-0.260049	2e-06	1.74287e-05
Dcp2	0.260042	2e-06	1.74287e-05
Pard6a	-0.259898	2e-06	1.74287e-05
Bub1	0.259895	2e-06	1.74287e-05
Slc26a8	-0.259865	2e-06	1.74287e-05
Nfat5	0.259847	2e-06	1.74287e-05
Prdm8	-0.259773	2e-06	1.74287e-05
Gm9999	-0.259756	2e-06	1.74287e-05
Gm525	-0.25969	2e-06	1.74287e-05
Ttc34	-0.259686	2e-06	1.74287e-05
Itprip	-0.259674	2e-06	1.74287e-05
1700013F07Rik	-0.259634	2e-06	1.74287e-05
Rnf181	-0.259629	2e-06	1.74287e-05
Lmnb2	-0.259619	2e-06	1.74287e-05
Fam71f2	-0.259593	2e-06	1.74287e-05
Capzb	-0.259541	2e-06	1.74287e-05
Gm10845	-0.259498	2e-06	1.74287e-05
1700034I23Rik	-0.259451	2e-06	1.74287e-05
Mcm4	0.259438	2e-06	1.74287e-05
Cyc1	0.259386	2e-06	1.74287e-05
Rnpep	-0.259383	2e-06	1.74287e-05
Ndufc1	-0.259366	2e-06	1.74287e-05
Mlc1	-0.259355	2e-06	1.74287e-05
Dpf2	0.259323	2e-06	1.74287e-05
Rxfp2	-0.259269	2e-06	1.74287e-05
Cox11	-0.259234	2e-06	1.74287e-05
Smpdl3a	-0.259156	2e-06	1.74287e-05
Bnip1	-0.259119	2e-06	1.74287e-05
Ran	-0.259096	2e-06	1.74287e-05
Dpp8	-0.259074	2e-06	1.74287e-05
Zglp1	0.259016	2e-06	1.74287e-05
Tmem256	0.258931	2e-06	1.74287e-05
Hnrnpdl	0.258918	2e-06	1.74287e-05
Maged1	0.258908	2e-06	1.74287e-05
Tc2n	0.25876	2e-06	1.74287e-05
4930433N12Rik	-0.258753	2e-06	1.74287e-05
Chchd10	0.25875	2e-06	1.74287e-05
Luc7l3	0.258741	2e-06	1.74287e-05
Hgh1	-0.258707	2e-06	1.74287e-05
Ube2l6	-0.25869	2e-06	1.74287e-05
Hmx1	-0.258649	2e-06	1.74287e-05
Atp2b1	0.258608	2e-06	1.74287e-05
Ralgds	-0.258516	2e-06	1.74287e-05
Slc22a15	-0.25851	2e-06	1.74287e-05
Cdc7	0.258492	2e-06	1.74287e-05
Trim13	-0.258492	2e-06	1.74287e-05
Nicn1	-0.258428	2e-06	1.74287e-05
4930591A17Rik	-0.258404	2e-06	1.74287e-05
Tmem147	0.258314	2e-06	1.74287e-05
Snrnp70	0.258274	2e-06	1.74287e-05
Cabyr	-0.258228	2e-06	1.74287e-05
Ovol1	-0.258228	2e-06	1.74287e-05
Pfkfb4	-0.25804	2e-06	1.74287e-05
Nt5c1b	-0.257997	2e-06	1.74287e-05
Srsf10	0.25797	2e-06	1.74287e-05
Ift46	-0.25796	2e-06	1.74287e-05
Rhpn1	-0.25795	2e-06	1.74287e-05
Hn1	-0.257947	2e-06	1.74287e-05
[truncated: 17,272 more rows]
