# Supplementary material for: Dual histone methyl reader ZCWPW1 facilitates repair of meiotic double strand breaks in male mice
Source: eLife. 2020 Apr 30;9:e53360. doi: 10.7554/eLife.53360 (PMC7237205; doi:10.7554/eLife.53360)
Supplement: Figure 2—source data 1. [file elife-53360-fig2-data1.xlsx]

## Sheet: NCBI Orthologs
ZCWPW1 orthologs retrieved from NCBI HomoloGene database. All orthologs were screened by PrositeScan or NCBI conserved domain (CD) for presence of both zf-CW and PWWP domains. Any ortholog that lacks either one of the two domains in both PrositeScan and NCBI CD was excluded. For each species with multiple orthologs isoforms, the longer isoform is reported in this table.
Species	Clade	Accession	Sequence
Acinonyx jubatus	Placental	XP_026897907.1	MMATLQSKEEHGKGSKKTFAPPVQKMHSLMCYSPNSPKEETLGISSSKDRLEKKEEKATTENGPSSGQEKKGKAKDKQAEKKAKEKLSLTNAEFEEIVQIVLRKSLQECLETSCAQPIRRTQLDKEPGIASSTDNDNADGEKVMVPHILEISATKEAGVTSVIETPKPGQPDPPPSEKKFNRFSLNKGKKGAQDEKMEKAQSGREPRQKAQLKKTVQNHSQIRNQQKGEGSGFGQCLVWVQCSSPNCEKWRRLCGNIDPSVLPDNWSCDQNTDLKYNRCDIPEESWIGHESDVAYASYIPGSIIWAKQYGYPWWPGMVESDPDLGEYFLFASHLDSLPSKYHVTFFGETVSRAWIPVNMLKNFQELSLELAGVEKLCWEKVPCLTKCARVRLFMRDSSF…
Ailuropoda melanoleuca	Placental	XP_019663561.1	MMTTLQSKEECGKGPKKTFAPPAQKLHSPMGYSPDPPKEETLGISSPKARLEKKEEKATTENGPRSGQEKKGKPQDKQAEKKEKEISSITNAEFEEIVQIVLQKSLQECLETSCAQPIRCTQLDKDPGIASSTDNGNADGERVMVPHILEMSATQEAGVTSVIKTSKPGQPDPAPSEKKSNRRSLSKGKKGSHEKMEKARSGHEQKQTDQLKKPVQDDSQTRNQEKGEGGGFGQCLVWVQCSSPDCEKWRRLCGNIDPSVLPDNWSCDQNTDSRYNRCDIPEESWTGRESDVAYASYIPGSIIWAKQYGYPWWPGMVESDPDLGEYFLFASHLDSLPSKYHVTFFGETVSRAWIPVNMLKDFQELSLELAGGKKFRNKDCNQKLGAALTMAQEAERISI…
Anolis carolinensis	Squamata	XP_008121622.1	MPGPEDKELKKRPKKVFASPVRLCHSPILKGKSDGLPGKQEDVEEVPDLLSHAAGDGVATRPMKAVRNPNKRKKEGTSRKKDSEMSKEKEGCLTDAQFEKIFQSALQRPLQECIENSGREGFSAESPEEKSLGRGTLEVSLAAKNGVSRNKSVVKNKPMPLETEKKAHRFGKKHQSKLSASKNAEGENEEPGADNGGCKENRKAAPKKKVQGNAPVVIDREEMQEEEEEEEEEAGRGGSGSSELNPPSCSSWCIAWIQCSDPNCHKWRRLSSKTDPSVLPEDWSCSQNLDLQYNSCSISEESWSGTEGEIVYAAYVPGSLVWAKQYGYAWWPGVIEADPYLGEYLLFSSQTDSLPSKYHVTFFGKTVSRAWISASMLRNFAGSSMEKGNGLDKPKSQTG…
Aotus nancymaae	Placental	XP_012330150.1	MFHKFHLITFLSECGKGPKRIFAPPAQKSYNLIPFSPNSPKEETLGISPPETEARISLPKARLKKEEKATTNNASSRGQEKKRKAQNNKQAEKKEKEKSSLTNAEFEEIVQIVLQKSLQERLGMGSGLDFSETSCAQPIVSTQSDKEPGITASATDTDNADGEEVPQAQEISVSWEGVAVPEIRTPKLGQPDPAPSEKKSSRLSLSKRKTEAGDEKVEKTQSGHELRQKDQLKKTVQDHFQIRDQQKGERSGFDQCLVWVQCSFPNCGKWRRLCGNVDPSVLPDNWSCDQNTDMEYNRCDIPEETWTGLESDVAYASYVPGSIIWAKQYGYPWWPGMIESDPDLGEYFLFTSHLDSLPSKYHVTFFGETVSRAWIPVNMLKNFQELSLEPSGMKKCRNK…
Balaenoptera acutorostrata	Placental	XP_007186711.1	MMTTLQSKDECGKGPKKTFAPPAQKLQSLMPCNLNSSKEEILGISSPEAETRPSLLKARLEKKKEKTTKENGTGSGQEIKGRAQDNKKAEKKEKGKSTLTNAEFEEIVQIVLQKSLQECLETSCAQPTRCTQLDKEPGIASSTTDNNNADGERVVVPHILEISASQEGGVIPEIKTSKPGQPDPAPSEKKFNKLSLSKRKKAAQDEKMEKAQSGHEHKQKDQLKKTVQDHSQIRDQQKGEGSGFGQCLVWVQCSSPNCEKWRRLRGNIDPSVLPDNWSCDQNTDLEYNHCDIPEETWTGHESEVAYASYVPGSIIWAKQYGYPWWPGMVESDPDLGEYFLFASHLDSLPSKYHVTFFGETVSRAWIPVNMLKNFQELSLELAGVKKCRSKDCSQKLGAA…
Bison bison	Placental	XP_010836191.1	MPTLESKEKCGKGPKNTFAPPAQKLHSLMSYNLNSSKEEILEISSPQAEVRPSLLKAGLEEKKKKKKTTTENGPGNGQEIQGKAQDSKNAKKEKEKSTLTNAEFEEIVQIVLQKSFQECLETSCTQPTRCTQLDKEPGIASSNTSDNNNADGDRVVVPPILEISASQEDGIIPEIKISKPGQPDSASSEKKFNKLSLSKRKKEAQDEKMEKDQSGHEHRQDDQHKKTIQDHSQNRDQQKGEGSGFGQCLVWVQCSSPNCEKWRRLRGNIDPSVLPDNWSCDQNTDLQYNRCDIPEETWTGHESDVAYASYIPGSIIWAKQYGYPWWPGMVEPDPDLGEYFLFASHLDSLPSKYHVTFFGETVSRAWIPVNMLKNFQELTLELSGVRKCKNKDCSQKLLV…
Bos indicus	Placental	XP_019843815.1	MMPTLESKEKCGKGPKNTFAPPAQKLHSLMSYNLNSSKEEILEISSPQAEVRPSLLKAGLEKKKKKKKTTTENGPGNGQEIQGKAQDSKNAKKEKEKSTLTNAEFEEIVQIVLQKSFQECLETSCTQPTRCTQLDKEPGIASSNTSDNNNADGDRVVVPPILEISASQEDGIIPEIKISKPGQPDSASSEKKFNKLSLSKRKKEAQDEKMEKDQSGHEHRQDDQHKKTIQXHSQNRDQQKGEGSGFGQCLVWVQCSSPNCEKWRRLXGNIDPSVLPDNWSCDQNTDLQYNRCDIPEETWTGHESDVAYASYIPGSIIWAKQYGYPWWPGMVEPDPDLGEYFLFASHLDSLPSKYHVTFFGETVSRAWIPVNMLKNFQELTLELSGVRKCKNKDCSQKLL…
Bos mutus	Placental	XP_014332881.1	MMPTLESKEKCGKGPKNTFAPPAQKLHSLMSYNLNSSKEEILEISSPQAEVRPSLLKAGLEKKKKKKKTTTENGPGNGQEIQGKAQDSKNAKKEKEKSTLTNAEFEEIVQIVLQKSFQECLGMAFIFSFGRMESSLDFSETSCTQPTRCTQLDKEPGIASSNTSDNNADRVVVPPILEISASQEDGIIPEIKISKPGQPDSASSEKKFNKLSLSKRKKEAHEKMEKDQSGHEHRQDDQHKKTIQDHSQNRDQQKGEGSGFGQCLVWVQCSSPNCEKWRRLRGNIDPSVLPDNWSCDQNTDLQYNRCDIPEETWTGHESDVAYASYIPGSIIWAKQYGYPWWPGMVEPDPDLGEYFLFASHLDSLPSKYHVTFFGETVSRAWIPVNMLKNFQELTLELSG…
Bos taurus	Placental	NP_001070321.1	MMPTLESKEKCGKGPKYTFAPPAQKLHSLMSYNLNSSKEEILEISSPQAEVRPSLLKAGLEKKKKKKKTTTENGPGNGQEIQGKAQDSKNAKKEKEKSTLTNAEFEEIVQIVLQKSFQECLETSCTQPTRCTQLDKEPGIASSNTSDNNNADGDRVVVPPILEISASQEDGIIPEIKISKPGQPDSASSEKKFNKLSLSKRKKEAQDEKMEKDQSGHEHRQDDQHKKTIQDHSQNRDQQKGEGSGFGQCLVWVQCSSPNCEKWRRLRGNIDPSVLPDNWSCDQNTDLQYNRCDIPEETWTGHESDVAYASYIPGSIIWAKQYGYPWWPGMVEPDPDLGEYFLFASHLDSLPSKYHVTFFGETVSRAWIPVNMLKNFQELTLELSGVRKCKNKDCSQKLL…
Bubalus bubalis	Placental	XP_025131146.1	MMPTLESKEKCGKGPKNTFAPPAQKLHSLMSYNLNSSKEEILEISSPQAEVRPSLLKAGLEKKKKKKTTTENGPGNGQEIQGKAQDSKNAKKEKEKSTLTNAEFEEIVQIVLQKSFQECLETSCTQPTRCTQLDKEPGIASSNTSDNNNADGDRVVVPPILEISASQEDGIIPEIKISKPGQPDSASSEKKFNKLSLSKKKKEAQDEKMEKDQSGHEHRQDDQQKKTIQDHSQNRDQQKGEGNGFGQCLVWVQCSSPNCEKWRRLRGNIDPSVLPDNWSCDQNTDLQYNRCDIPEETWTGHESDVAYASYIPGSIIWAKQYGYPWWPGMVEPDPDLGEYFLFASHLDSLPSKYHVTFFGETVSRAWIPVNMLKNFQELTLELSGVRKCKNKDFSQKLLV…
Callithrix jacchus	Placental	XP_017821913.1	MFHKFHLITFLSECGKGPKRIFAPPAQKSYNLIPFSPNSPKEETLGISSPETEARISLPKPRLKKEEKATTNNASSRGQEKKRKAQNNKQAEKKEKEKSSLTNAEFEEIVQIVLQKSLQEHLGMGSGLDFAETSCAQPIVSTQSDKEPGITASATDTDNADGEEVPHTQEISVSWEGEGVPEIRTSKLGQSDPAPSEKKSSRLSLSKRKKEAGDEKVEKTQSEHELRQKDQLKKTVQDHSQIRDQQKGERSGFDQCLVWVQCSFPNCGKWRRLCGNVDPSVLPDNWSCDQNTDKEYNRCDIPEETWTGLESDVAYASYVPGSIIWAKQYGYPWWPGMIESDPDLGEYFLFTSHLDSLPSKYHVTFFGETVSRAWIPVNMLKNFQELSLEPSGMKKHRNK…
Callorhinus ursinus	Placental	XP_025720391.1	MMTTLQSKEEYGKWPKKTFAPPAQKLHSLMCYSPNSPKEETLGISSPKARSEKKEEKATTGNGPSSGLENKGKPQDKQAEKKEKERASLTNAEFEEIVQIVLRKSLQECLEMGSSLDFAETSCAQPIRCTQLDKERGISSTDNDDADGERVMVPHILEISATEEAGVTSVRKTSKPGQPDPAPSQKKFNRPSLIKGKKRAQNEKMEKAQSGHEQRQKNQLKKTVQDDSQTRNQQKGEDGGFSQCLVWVQCSSPNCEKWRRLRGNIDPSVLPDNWSCDQNTDSRYNRCDIPEESWTGRESDVAYASYIPGSIIWAKQYGYPWWPGMVESDPDLGEYFLFASHLDSLPSKYHVTFFGETVSRAWIPVNMLKNFQELSLELAGVKKCRNKDCNQKLGAALTM…
Camelus bactrianus	Placental	XP_010955305.1	MMTTLQSKEEGGKGPKKTFAPPAQKLHSLMPCSLNSSKEEILGISSPEAEARPSLLQARLEKKEEKATTENGPGGGQKIKRKAQNEKKAEKKEKEKSSLTDAEFEEIVQIVLRKSLQECLETSCAQPTRCTQLDKEPGISSVTDNDSADGERVVVPHILEISASKEGGVIPEIKTSKPGHPDPASSEKKFGRFSLSKRKKEAQYEKMEEAQSGHEHRQKDQLKKIVQGHSQIRDQQKREGGGFGQCLVWVQCSSPNCEKWRRLRGNIDPSVLPDNWSCDQNTDLEYNRCDIPEETWIGRESDVAYASYIPGSIIWAKQYGYPWWPGMVESDPDLGEYFLFASHLDSLPSKYHVTFFGETVSRAWIPVNMLKNFQELSLELAGLKKCRNKDCSQKLGAAL…
Camelus dromedarius	Placental	XP_010998235.1	MMTTLQSKEEGGKGPKKTFAPPAQKLHSLMPCSLNSSKEEILGISSPEAEARPSLLQARLEKKEEKATTENGPGGGQEIKRKAQNEKKAEKKEKEKSSLTDAEFEEIVQIVLRKSLQECLETSCAQPTRCTQLDKEPGISSVTDNDSADGERVVVPHILEISASKEGGVIPEIKTSKPGHPDPASSEKKFGRFSLSKRKKEAQYEKMEEAQSGHEHRQKDQLKKIVQGHSQIRDQQKREGSGFGQCLVWVQCSSPNCEKWRRLRGNIDPSVLPDNWSCDQNTDLEYNRCDIPEETWIGRESDVAYASYIPGSIIWAKQYGYPWWPGMVESDPDLGEYFLFASHLDSLPSKYHVTFFGETVSRAWIPVNMLKNFQELSLELAGLKKCRNKDCSQKLGAAL…
Camelus ferus	Placental	XP_014423419.2	MMTTLQSKEEGGKGPKKTFAPPAQKLHSLMPCSLNSSKEEILGISSPEAEARPSLLQARLEKKEEKATTENGPGGGQKIKRKAQNEKKAEKKEKEKSSLTDAEFEEIVQIVLRKSLQECLETSCAQPTRCTQLDKEPGISSVTDNDSADGERVVVPHILEISASKEGGVIPEIKTSKPGHPDPASSEKKFGRFSLSKRKKEAQYEKMEEAQSGHEHRQKDQLKKIVQGHSQIRDQQKREGGGFGQCLVWVQCSSPNCEKWRRLRGNIDPSVLPDNWSCDQNTDLEYNRCDIPEETWIGRESDVAYASYIPGSIIWAKQYGYPWWPGMVESDPDLGEYFLFASHLDSLPSKYHVTFFGETVSRAWIPVNMLKNFQELSLELAGLKKCRNKDCSQKLGAAL…
Canis lupus	Placental	XP_013969694.1	MMAMLQSKEECGKGPKKTCTPSAQKLYSMMCYSPNSSKEESLGVSSPKARLKKKEEKTTTENGSSSGQENKGKPQDKQAEKEKEKSSLTNAEFEEIIQIVLRKSLQECLETSCAQPIRCTLLDKEPGIAASTDNDNADGERVMVPHILEISATQEAGVTSVIKTSKPGQPDPAPSEKKSNRPFLSKGKKGAQDEKMEKTQSGHEHRQKDQLKKTVQVDSQIRNQQRGKGGDFGQCLVWVQCSSPNCEKWRRLCGNIDPSVLPDDWSCDQNTDLKYNHCDIPEESWTGRESDVAYASYIPGSIIWAKQYGYPWWPGMVESDPDLGEYFLFASHLDSLPRVKARRRTRGHFLFQSKYHVTFFGETVSRAWIPVNMLKNFQELSLELAGVKKCRNKDCNQKL…
Capra hircus	Placental	XP_005697886.1	MMPTLESKEKCGKGPKNTFAPPAQKLHSLMPYNLNSSKEEIPEISSPQAEVRPSLLKAGLEKKKEKTTTENGPGSGQEVQGKAQDSKNTKKEKEKSTLTDAEFEEIVQIVLRKSFQECLETSCTQPTRCTQLDKEPGIASSNTSDNNNADGDRVVVPPILEISASQEDGIIPEIKISKPGQPDSASSEKKFNKLSLSKRKKEPQDEKMEKDQSEHEYRQDDQHKKTIQDHSQDGDQQKGEGNGFGQCLVWVQCSSPHCEKWRRLRGNIDPSVLPDNWSCDQNTDLQYNRCDIPEETWTGHESDVAYASYIPGSIIWAKQYGYPWWPGMVEPDPDLGEYFLFASHLDSLPSKYHVTFFGETVSRAWIPVNMLKNFQELTLELSGVRKCKNKDCSQKLGVA…
Carlito syrichta	Placental	XP_008065282.1	MTTLQNKEECGKEPKKIFAPPAQKLSSLIPCSLNSCDKTMGISSPETEAKASLPKARLEKRKEKAAAENGLSSGQEEEGKAQDNQQAEKKEKEKSSLTSAEFEEIVQIVLQKSLQECLGMGFGLDFTETSIAQPIICTQSDKEPGIISSASYNANGVMVPQIPKISASWEDEVVPELRTSKIGQPDPARSKKKFSRLSLSKRKKDAHEKMEKVQGGHEQRQKDRLKKMIQDHSQIKDHQKGEESGFGQCLIWVQCSSPNCEKWRQLRGNIDPSILPDNWSCDQNTDLEYNRCDIPEETWTGLESDVAYASYIPGSIIWAKQYGYPWWPGMVESDPDLGEYFLFTSHLDSLPSKYHVTFFGETVSRAWIPVNMLKNFQELSLELAGVKKCRNKDCSQKLG…
Castor canadensis	Placental	XP_020033168.1	MMTTLQNKEECGKGPKKTFAPPIQKLHSMIRHAPDSPKEVTPGVNSPQAETRPNLPKARIEQKVTRENGPSSGQETKGKAQDNKPAGKKVKEKSSLTNAEFEEIVQIVLQKSLQECLGIGSGLNFAEVSCAQCIVCTQLNKQRGIASSATKNMDGVMVSHAPETSAAVEDEVVPEIRTSKPSQPIPAPSEKKLTKLPLSKRKKRAQDEKIGKIQGGHEHRQKDQLKQMIQNHFYIRDQKKGEESGFGQFLVWVQCSFSNCEKWRRLPGNIDPSVLPDNWSCDQNPDLNYNRCDIPEEAWTGRESDVIYASYIPGSIIWAKQYGYPWXGATDRASFLNLAGHLXLQSKYHVTFFGETVSRAWIPVNMLKNFQELSQELAGVKKCRNKDYSQKLGAAIVMA…
Cavia porcellus	Placental	XP_013008146.1	MMATLQKKEECGKGPKKAFAPPTQKLHSMIPSSPDSPKETLGIGSSKAEAKPRQPKARLEKKEKAVSENGPRLGREKKGKAQDRKPIEKNGKEKLILTNAEFEEIVQTVLRKSLKECLGMGSGLNFTESSCVKTTVCIQSDKEPEIVASDTDNDNASGEKIMVPHTSEISASLEGEVTPEIRASEPGQAIPKVSEKKLNRLDLSKRKKEAQDEKMETPQGRRKHRQRDRLGYRIQNHSQSRNQQKRKGNGFGHCIVWVQCSSPNCRKWRQLCGNIDPSVLPDNWSCNQNTDLEYNCCDIPEVAWTGNESEVVYASYVPGSLIWAKQYGYPWWPGMVESDPDLGEYFLFASHLDSLPTKYHVTFFGETVSRAWIPANMLKNFQELSLEQTGVKKCRNKDY…
Cebus capucinus	Placental	XP_017389097.1	MMTTLQNKEECGKGPKRIFAPPAQKSYNLIPFSPNSPKKETLGISSPETEARISLPKARLKKEEKATTNNASSRGQEKKRKAQNNKQAEKKEKEKSSLTNAEFEEIVQIVLQKSLQERLGTGSGLDFAETSCAQPIVSTQSDEEPGITASATDTDNADGEEVPHTQEISVSWEGEAVPEIRTSKLGQSDPAPSEKKSSRLSLSKRKKEAGDEKVEKTQSGHELRQKDQLEKTVQDHSQIRDQQKGEISGFDQCLVWVQCSFPNCGKWRRLCGNVDPSVLPDNWSCDQNTDMEYNRCDIPEETWTGLESDVAYASYVPGSIIWAKQYGYPWWPGMIESDPDLGEYFLFTSHLDSLPSKYHVTFFGETVSRAWIPVNMLKNFQELSLEPSGMVNTRNACIR…
Ceratotherium simum	Placental	XP_014652644.1	MMTTLQSKEYGKGPKKTFAPPAQKLHSLMPCSSNSPKEETLGISTSETEDKPSLPKARLKKKEKKATTENNPSSGQEKKGKAQDNKQAEKKEKEKSSLTNAEFEEIIQIVLQKSLQECLGMGSSLDFPEISCAQPIRCTQLDKEPGIASSTTDNDNADGDMVMVPRILEISASQEDGIIPEIKTSKPGQPDPAPSEKKFNRLSSSKRKKEAHEKMEKAQSGHDHRQKDQLKKAVQDNSQIRDQQKGEGSGFGQCLVWVQCSSPNCEKWRRLRGNIDPSVLPDSWSCDQNTDLEYNRCDVAEETWTGHESDVAYASYIPGSIIWAKQYGYPWWPGMIESDPDLGEYFLFASHLDSLPSKYHVTFFGETVSRAWIPVNMLKNFQELSLELTGVKKYRNKDC…
Cercocebus atys	Placental	XP_011912695.1	MMTTLQNKEECGKGPKRIFAPPAQKSYSLLPCSPNSPKEETLGISSPETEASISLPKASLKKEEEKATTKNGPSRGQEKKRKAQNNKQAEKKEKEKSSLTPAEFEEIVQIVLQKSLQECLGMGSGLDFAETSCAQPIVSNQSAKEPGITASATDTDNANGEEVPHTQEISVSWEGEAAPEIRTSKLGQPDPVPSKKKSNRLTLSKRKKEAQDEKVEKTQGGHEHRQEDQLKETVQDHSQIRDLQKGEISGFGQCLVWVQCSFPNCGKWRRLCGNIDPSVLPDNWSCDQNTDVQYNRCDIPEETWTGLESDVAYASYIPGSIIWAKQYGYPWWPGMIESDPDLGEYFLFTSHLDSLPSKYHVTFFGETVSRAWIPVNMLKNFQELSLELSGMKKRRNDCS…
Chelonia mydas	Turtle	XP_027678182.1	MKKTFAPPLAKPHVLSLREGPEHHGRKKDTRAKEAMTYLLSQGTSDSTETQLKAGHPDTDVKRWKKSRVAKEEDMGHVKGPETAQDVEKRAKRNSSRASAKEMCHLTDLQFEEIVQCVLQKSLQECMEESKRTFHQAEATEVAEQQGLKKETLETSLPAGNLVQHSDEPKGTVSAMDLKESLPKAKKRNKLSLNKMRKEMHESTEANKERRKRQRKGEPKKIVQGYTLIADQEETEEGGESTFNQCVAWVQCSYPSCEKWRRLSSDIDPSVLPEDWTCSQNTDLQYNSCDVPEETWSGSENEVVYATYVPGSIIWAKQFGYPWWPAMVECDPDIGEYFLFSSRLDSLPSKYHVTFFGEAVCRAWISATMLRNFHEFSRESLGL
Chinchilla lanigera	Placental	XP_005413785.1	MATLQKEECGKGPKKTFAPPTQKLHSMLPCPPDLPKEALGIGSPEAEAKPSQPKLEKKKAATEKGPSLGREKKRKAQDSKPGEKNGKEKIILTNAEFEEIVQTVLRKSLQECLGMGSGLDFAETSCVKPTVCIQSDKEPGIVASATDNDNANGEKVMVPHAPEISAFLQDAVTPEMRASEPGQAIAAPSEKKLRRLYLSKRKKEAQDEKMETPQHGHEHGQTNRREDVIQNRKRKSNGFSHCIVWVQCSSPNCRKWRRLCRNIDPSVLPDNWFCYQNTDVDYNCCDIPEEAWTGNESEVVYASYIPGSIIWAKQYGYPWWPGMVEADPDLEEYFLFASHFDSLPSKYHVTFFGETVSRAWIPANMLKNFQELSLEQTGVKKCRNKDYIQKLEVAVTMAY…
Chlorocebus sabaeus	Placental	XP_008017147.1	MCFKNNQALRLPPKKICDTKRILGFVVFPGRSGERWRNYLSRGNADAVSSCACASDSASAPPGGGASAQGVLVPFLGGGKPGSRCEGLAESLRQLVLHLAFRSSLLLKLSVFVIVKEVNSPETEEGQPELSESDFLAFPSLLISPNSPKEETLGISSPETEASISLPKTSLKKEEEKAATKNGPSRGQEKKRKAQNNKQAEKKEKEKSSLTPAEFEEIVQIVLQKSLQECLGMGSGLDFAETSCAQPIVSTQSAKEPGITASATDTDNANGEEVPHTQEISVSWEGEAAPKIRTSKLGQPDPVPSKKKSSRLTLSKRKKEAHEKVEKTQGGHEHRQEDQLKETVQDHSQIRDLQKGEISGFGQCLVWVQCSFPNCGKWRRLCGNIDPSVLPDNWSCDQN…
Chrysemys picta	Turtle	XP_023969023.1	MMKKTFAPPVAKPHVLSLREGPEHHGKEEDARAKEAITYLLSQGSSDSIKTKLKEGHPDTDVQRWKKSRVAKEEDTGHVKDPATPRDVEKRPKRNSNNASAKEMCHLTDLQFEEIVQSVLQKSLQECMEESKRTFHQAEATEAAEPQGLKKETFETSRPAGNLVQHSDEPKGTASAVDIKEPLPKAKKRNKLSLNKMRKKLPDESTEANKERHKRHRKGEPKKIVQGYTLIADQEETEEGGESTFNQCVAWVQCSYPSCEKWRRLSSDTDPSVLPEDWTCSQNTDLQYKSCDVPEEMWLGSENEVVYATYVPGSIIWAKQFGYPWWPAMVECDPDIGEYFLFSSRLDSLPSKYHVTFFGESVSRAWISAPMLRNFHAFSTESLGLKTLRSKDSRQKLDS…
Chrysochloris asiatica	Placental	XP_006859877.1	MMTTLQKKGECGKGPKKTFAPPAQKLQRLMPSSPNSLKENILGISFPEVETKSSLPKSKLVKKNEKAPTENVQGRGQEKKRKNQYKKAEKKAEKEGASLTNAEFEEIVQIVLQKSLQECLGMAXSGLGFAEISCAQPIACSQSDKEPGTSSVTTDNGNADGLIVHHTPESSASQQNGVVLEINAAQLVQPDPAPPEKKLSRLSLNKRKKGENEKPEKFQVGHENKQKDQSKKTGQDHSQIKDQQKEKGGFGQCLVWVQCSFPNCEKWRRLRGNIDPSVLPDNWSCDQNTDLEHNRCDIPEEIWTGHENDVAYASYIPGSIIWAKQYGYPWWPGMVESDPDLGEYFLFASHLDSLPSKYHVTFFGETVSRAWIPVNMLKNFQELSLELAGVKKCKNKDCI…
Clupea harengus	Bony fish	XP_031441394.1	METKIGQKEKPKFAPPSARAKQRQVKETTKSKDGDTKPNIPREINEKIATDTEEQDYGIEEVGVVFKKAINLSEKQKPCAGTGGKKKVGGQDDQAGGMVTFSESQSLSEINDEAGREGAEKKEKKEKLKNKAEEPDTGGDEDADGMTKKNKHVQRTGDTGAAQKNRKEKKRKEKTEQMPKAQEKREHVEKASKTLTDSQYDNLFDSVLGASELETCMEDARAILCEVELLQASIDQGTNKVREESEEEGSRDSCEEREQEEHEIYEDGREEMQRSYKERKETGAKGGSCRKRRREEEEDDDSETDEYDSWVQCSRAECKKWRRLQDDTDPSTLPNNWTCRENTDSACNSCDVPEDSWSVSKEEEFYYCSLVPGSLVWAQQTGYPWWPAMIERDPGANDF…
Colobus angolensis	Placental	XP_011799293.1	MMTTLQNKEECGKGPKRIFAPPAQKSYSLLPCSPNSPKEETLGISSPETEASISLPKASLKKEEEKATTKNGPSRGQEKKRKAQNNKQAEKKEKEKSSLTPAEFEEIVQIVLQKSLQECLGMGSGLDFAETSCAQPIVSTQSAKEPGITASATDTDNANGEEVPHTQEISVSWEGEAAPEIRTSKLGQPDPVPSKKKSNRLTLSKRKKEAQDEKVEKTQGGHEHRQEDQLKETVQAHSQIRDLQKGEISGFGQCLVWVQCSFPNCGKWRRLCGNIDPSVLPDNWSCDQNTDVQYNRCDIPEETWTGLESDVAYASYIPGSIIWAKQYGYPWWPGVIECDPDLGEYFLFTSHLDSVPSKYHVTFFGETVSRAWIPVNMLKNFQEMSLELSGMKKRRNDCS…
Condylura cristata	Placental	XP_004691686.1	MMTTLQSKEECGKAPKKTFAPPGQKLCNLIPYSSNSPKEGTLGINFPEADTKPNLPKASLEKKENATTKNGPSSGQEKKGKTQDSKQVKKKEKEKSSLTNAEFEEIVQIVLRKSLQECLEMRASLYFAETSCAQPIVYAHVDKEPKIAASTDNDNADGVGLKVPHILEISVSQEDGIIPKIKTSTAGQPDPVPSEKRFSRPSLSKRKKETQNEKVEKAQSGHEQKQNDPLETTNQGHCQIRSQQNGEGCGFGQCLVWVQCSFPNCEKWRRLRGNIDPSVLPDNWSCDQNTDLEHNRCDIPEEIWTGRESDVAYASYIPGSIIWAKQYGYPWWPGMVESDPDLGEYFLFSSHLDSLPSKYHVTFFGETVSRAWIPVNMLKNFQELSLELAGVKKCRNKDC…
Cricetulus griseus	Placental	XP_016835257.1	MMATSQNIKEYEKGTKKTFASPTQKSHHVKPQADSWKEDPQGTSSLEAEAKPRRPRASPKKEQKTATEHGPNGGQEKKRKAQDKPAKKKGKEKQTLTNAEFEEIFQIVLRKSLQEYLGLGSGLNFAETSCVQPIIPTKSDKEPGIASPATDNENADGINSREEVIVPDTREIASSLEEEVDSEIRTSKPGQLAAEPSKKKSNRLSLSKRRKKSEDEKMEEIQDGYECILKDKQKTTIQDPSQIRGQQKEEEGGFGQCLIWVQCSSSKCEKWRQLRGDIDPSVLPDNWSCDQNPDLNYNRCDIPEETWTGCESDVAYASYVPGSIVWAKQYGYPWWPGMIETDPDLGEYFLFSSHLDSLPSKYHVTYFGERVSRAWIPVSMLKNFQELSLELVRGKTCRN…
Dasypus novemcinctus	Placental	XP_023444163.1	MTTLQNKEECGKGPKKTFAPPTQKLHSLMPFNPNSPKEETQGFSYPVAGARPSPPNARLEKKKEKVNTENGPGGSQEKKGMDQDNKQAEKKANKEKASLTNAEFEEIVQIVLRKSLQECLENSCTQPIGCIQSDREPGIASTTTSENSNADGERLMVPHTPEISAPQEDRVVLEINTSEPGLPDPAPTEKKVNRFSLNKRKKESQDEKMEKVQGRPEHKQKDQPKKTIQDHSQTSDKQKGESSGFGQCLVWVQCSSPNCEKWRRLRGNIDPSVLPDNWSCDQNTDLEYNRCDIPEETWTGRESDVAYASYIPGSIIWAKQYGYPWWPGMVESDPDLGEYFLFASHLDSLPSKYHVTFFGETVSRAWIPVNMLKNFQELSLELARAKRCRNKDCSQKLGA…
Delphinapterus leucas	Placental	XP_030619567.1	MMTTLQSKEEFGKGPKKTFAPPAQKLHSLMPYNLNSSKEEILGISSPEAETRPSLLKARLEKKKQKTTKENGTGSGQELKGKAQDNKKAEKKEKGKSTLTNAEFEELVQIVLQKSLQECLGMASSLDFAETSCAQPTRCTQLDKEPGIASSTTDNNNADGERVVVPHILEISASHEGGVIPDIKTSKPGQPDPAPSEKKFNKLSLSKRKKAAQNEKMEKAQSGHEHRQKDQLKKTVQDHSQIRDQQKGEGSGFGQCLVWVQCSSPNCEKWRRLRGNIDPSVLPDNWSCDQNTDLEYNHCDIPEETWTGHENEVAYASYIPGSIIWAKQYGYPWWPGMVESDPDLGEYFLFASHLDSLPSKYHVTFFGETVSRAWIPVNMLKNFQELSLELAAVKKCRNK…
Desmodus rotundus	Placental	XP_024427379.1	MMTTLQSKDECGKGPKKPFAPPAQKLHSLVPYSPNSPKGETLGSSFGETEARPNLLKAQLEKKEEKATTENDASSGQEEKVKAQDNKQAEKKEKEKSSLTNEEFEEIVQIVLQKSLQQCMGMAYETSCVQPIRCTQLDKEPGNASSTTDNDNADRERVMVPHILEISASQEDGIIPKTKTSKPGQPDPSTSEKKFSKLSLSKRKKKAQDEKMKKAQSGYEHRQKDQPKKTVQDHSQIRVQQEREESGFGQCVVWVQCSSPNCEKWRQLRGNIDPSVLPDTWSCDQNTDLEHNRCDIPEESWVGRESEVAYASYIPGSIIWAKQYGYPWWPGMVECDPDLGEYFLFASHLDSLPSKYHVTFFGETVSRAWIPVNMLKNFQELSLELTGVKKCRNKDYSQK…
Echinops telfairi	Placental	XP_012860881.1	MTTLQNKEEHGKGPMKSFAPPAKKLRRLTLTNPNSLKEDTLGITSSEGETKPSMPKARFKKKEKPPTELGQGSGQKKKGKNPLNKQAEKEAEKERTSLTNEEYEEIFQIVLQKSREECLETSCAQPIGGTQTDKELGIASNTANIDNLDGRRLIVPYTPENPTSQENGVVSEINANKPGQPHPVSSEKKCNKLCLNKRKKNAQNGKLEISQGGHEHRQEDQPKNSGQDHAQITEQLEGDKGGFGQYLVWVQCSSPNCEKWRRLCRNMDPSILPSNWSCDQNTDLEYNRCDIPEETWTGHESDVAYASYIPGSIIWAKQYGYPWWPGMVEPDPDLGEYFLFASHLDCLPSKYHVTFFGEAVSRAWIPVNMLKNFQELSLDLAGAKKFRNKDYIQKLGPAV…
Elephantulus edwardii	Placental	XP_006896644.1	MTTLQNKECGKRPKRRFAPPTQKVHGLMPASPNSLKEDPLENTSPERENMPSLSKAKLEKNEKATTENGPVGGQNKKGKNLHKHSEKKAEKERTSLSNAEFEEIVQTVLRKSIEECLETSCAQRVGCIQTAKGPGIASITADNDNTDGDELTVPHTPASQQNEVVPKVNESKPDQLDPAFSEKKFKRLSLNKRKKGAQNEELEHEQEEQTKNIIPNCPQIKEPQKGESGGFGHCLVWVQCSSPNCEKWRQLRGNIDPSILPENWSCDQNTDVEYNRCDIPEETWIGPESDVAYASYIPGSIIWAKQYGYPWWPGMVESDPDLGEYFLFASHLDSLPSKYHITFFGDTVSRAWIPVNMLKNFQELSLELAGVKKFKNKDFSQKLKAALLMAQAAEQISIQ…
Enhydra lutris	Placental	XP_022356817.1	MCYSPKPPKEDTVRISSPKARLEKKEAKATTENGPSSGQENKGKPQDKQVKKKEKERSSLTSAEFEEIVQIVLRKSLEECLEMGSSLDFTETSCAQPLRCTQLDKEPGIASSTDNDNADGVMVPHILEISATKEAGVSSVIKTSKPGQPDPAPSEKKFNRPSLSKGKKGAQDDKMEKVQSTYKQRQKDQLKKTVQDDSQTRNQQKGEGSGFGQCLVWVQCSFPNCEKWRRLCGNIDPSVLPDNWSCDQNTDSRYNRCDIPEESWTGRESDVAYASYIPGSIIWAKQYGYPWWPGMVESDPDLGEYFLFASHLDSLPSKYHVTFFGETVSRAWIPVNMLKNFQELSLELAGMKKCRNKDCNQKLGAALSMAQEAEQISIQERVNLFGFRSRYNGSDSSGE…
Eptesicus fuscus	Placental	XP_028001011.1	MMTTSQSKEEYGKGSKKPFIPPAQKLHSLMPYSPNSHKEETMEISSLEAEAGPNLAEAGPNLRKAKLEKKEEEATTVNGPCSDQEKKVKVQDNKQAEKKAKEKSNLTNEEFEEIVQIVIQKSLQECLGMAYETSCAQPIRRTQLDKEPGISSTTDNDNADREWVTVPHILEISASQEDGIIPEIKISKPGQPGPASSEKKFSKLSIRRRKKKAQDEKIKKAQRGHEHKQKDQPMKMVQGHAQMRDQQKGEESGFGQCLVWVQCSSPNCEKWRRLRGNIDPSVLPDNWSCVQNTDLEYNRCDIPEETWIGHESDVAYASYIPGSIIWAKQYGYPWWPGMVESDPDLGEYFLFASHLDSLPSKYHVTFFGETVSRAWIPVNMLKNFQELSLELSGVKKCRN…
Equus asinus	Placental	XP_014709479.1	MMTTVQGKECGKGPKKTFAPPAQKLQSLMPCSSDSPKEETLGISSLEAEARPDLPKARSKKKEKKATTENGPSSGQGEKRKSQDNRQAEKKDKEKSSLTNAEFEEIIQIVLRKSLQECLGMESSLDFTETSCAQSIRCTQLDKEPGIAVSTTDNDNADGEMVMVPHILEISASQEDEIIPEIKTSEPFQPDPAPSERKFNRLSLSKRKKEAHGKVEKAQSGHEHRQKDQLKKAVQDYSQIRDPQKGEGSGFDQCLVWVQCSSPNCEKWRRLRGNIDPSVLPDNWSCDQNTDLEYNRCDIPEETWTGRESDVAYASYIPGSIIWAKQYGYPWWPGMIESDPDLGEYFLFASHLDSLPSKYHVTFFGETVSRAWIPVNMLKNFQELSLELTGVKKYRNKDC…
Equus caballus	Placental	XP_023511103.1	MMTTVQGKECGKGPKKTFAPPAQKLQSLMLCSSDSPKEETLGISSPEAEARPDLPKARSRKKEKKATTENGPSSGQGEKRKSQDNRQAEKKDKEKSSLTNAEFEEIIQIVLRKSLQECLGMGSSLDFTETSCAQSIRCTQLDKEPGIAVSTTDNDNADGEMVMVPHILEISASQEDGIIPEIKTSEPFQPDPAPSERKFNRLSLSKRKKEAQDGKMEKAQSGHEHRQKDQLKKAVQDYSQIRDPQKGEGSGFDQCLVWVQCSSPNCEKWRRLRGNIDPSVLPDNWSCDQNTDLEYNRCDIPEETWTGRESDVAYASYIPGSIIWAKQYGYPWWPGMIESDPDLGEYFLFASHLDSLPSKYHVTFFGETVSRAWIPVNMLKNFQELSLELTGVKKYRNKD…
Equus przewalskii	Placental	XP_008525539.1	MMTTVQGKECGKGPKKTFAPPAQKLQSLMLCSSDSPKEETLGISSPEAEARPDLPKARSRKKEKKATTENGPSSGQGEKRKSQDNRQAEKKDKEKSSLTNAEFEEIIQIVLRKSLQECLGMGSSLDFTETSCAQSIRCTQLDKEPGIAVSTTDNDNADGEMVMVPHILEISASQEDGIIPEIKTSEPFQPDPAPSERKFNRLSLSKRKKEAHGKMEKAQSGHEHRQKDQLKKAVQDYSQIRDPQKGEGSGFDQCLVWVQCSSPNCEKWRRLRGNIDPSVLPDNWSCDQNTDLEYNRCDIPEETWTGRESDVAYASYIPGSIIWAKQYGYPWWPGMIESDPDLGEYFLFASHLDSLPSKYHVTFFGETVSRAWIPVNMLKNFQELSLELTGVKKYRNKDC…
Erinaceus europaeus	Placental	XP_016048772.1	MAASQNKEECEKGLKKIFAPPAQKLLGLVACSSNSSQEEVPRISSPEAEPRPNLTKAQLEKKEKAAAETGLGSGRGKKGKTQNPKKTEKKGKEKSSITNEEFEEIVQIVLQKSFQNCLDTTYAQSMGCSKLHKEPEIVSSATGNNSADGERVMITHILEISASQEDRLPEIKTSVTDQPAPVPAVKKISKLSSNKRKKETQNENVEKTQSGPEHRQKDQPKKTAQDPSQSRNHQEEEESGFGQCQVWVQCSSPNCEKWRRLQGNIDPSVLPDNWSCEQNTDLAYNRCDIPEETWTGHESDVAYASYIPGSIVWAKQHGYPWWPGMVESDPDLGEYFLFASHLDSLPSKYHVTFFGETVSRAWIPVNMMKNFQELSLELSGVKKCRNKDYIQKLKVALMM…
Esox lucius	Bony fish	XP_028973752.1	MDTVAAGQKVKLKFALPVPLKKKSGLEEKEEDKKRKEERYKKNGNTHVRERKAWGFSVQDTGGERGVVSKSCESVIKGGERGVLSKACGSAKKGEGERGVLSKACGSVKKGEGERGVLSKACGSVKKGEGERGVPSKACGSVKKGEGERGVLSKACGSVKKGEGERGVPSKACGSVKKGEGERGVPSKACGSVKKGEGERGVPSKGEGQINKKLTYRKSEAVKAVFKGSLKQKENEGTNVKKRKLKSKVNQHNKESDSGKERLTINMKIENGENEKVRKERKEMKKKRVRNQTDSKKVLSLTDSQYDDIFESASALYTPGDSSLEDARAVLSEVELLQASIEQVSNREMEEKEEERKEEGTDGDEDGNIEPHTSNSVSGERKRSRPVCQRKRSRPGCQR…
Eumetopias jubatus	Placental	XP_027965729.1	MMTTLQSKEEYGKWPKKTFAPPAQKLHSLMCYSPNSPKEETLGISSPKARSEKKEEKATTGNGPSSGLENKGKPQDKQAEKKEKERASLTNAEFEEIVQIVLRKSLQECLEMGSSLDFAETSCAQPIRCTQLDKERGISSTDNDDADGERVMVPHILEISATEEAGVTSVRKTSKPGQPDPAPSQKKFSRPSLIKGKKRAQNEKMEKAQSGHEQRQKNQLKKTVQDDSQTRNQQKGEDGGFSQCLVWVQCSSPNCEKWRRLRGNIDPSVLPDNWSCDQNTDSRYNRCDIPEESWTGRESDVAYASYIPGSIIWAKQYGYPWWPGMVESDPDLGEYFLFASHLDSLPSKYHVTFFGETVSRAWIPVNMLKNFQELSLELAGVKKCRNKDCNQKLGAALTM…
Felis catus	Placental	XP_019676053.1	MMATLQSKEEHGKGSKKTFAPPVQKMHSLMCYSPNSPKEETLGISSSKDRLEKKEQKATTENGPSSGQEKKGKAKDKQAEKKAKEKLSLTNAEFEEIVQIVLRKSLQECLETSCAQPIRRTQLDKEPGIASSTDNDNADGEKVMVPHTLEISATKEAGVTSVIETPKPGQPDPPPSEKKFNRFSLSKGKKGAQDEKMEKAQSGREPRQKAQLKKTVQNHSQIRNQQKGEGSGFGQCLVWVQCSSPNCEKWRRLCGNIDPSVLPDNWSCDQNTDLKYNRCDIPEESWIGHESDVAYASYIPGSIIWAKQYGYPWWPGMVESDPDLGEYFLFASHLDSLPSKYHVTFFGETVSRAWIPVNMLKNFQELSLELAGVEKLCWEKVPCLTKCARVRLFMRDSSF…
Fukomys damarensis	Placental	XP_019060878.1	MMATLQKKEECGKGLKKTFAPPTQKLHSMIPCGPDLPMETLGISSPEAEVKPSLPKARLEKKKEEEEEEEEAATEHGPSLGQDKKRKARDNKPAEKNEKEKLILTNAEFEEIVQTVLRKSLKECLGMGSGLNFAETSCVKPTMCIQSDKETEIAASATDDDIASGESVMVPQVPEISASLKDEVTPDKGASEPGLAILASSEKKHNRLYLNKRKKQAQDEKMETTQSGSEYRQTDQLNNMIQNRSQTQTRVQKKRKGSGFGHCIVWVQCSFPNCKKWRQLCRNTDPSVLPDNWFCHQNTDVNYNCCDIPEEAWTGPESEVVYACYVPGSIVWAKQYGYPWWPGMIESDPDLGEYFLFASHLHSVPSKYHVTFFGEAVSRAWIPVNMLKNFQELCLEQTG…
Galeopterus variegatus	Placental	XP_008578945.1	MMTTLQNKECGNGPKKTFAPPAQKLYCLIPCSSNSPKKETLGIGSSQAEKSSLTNEEFEEIVQIVLRKSLQECVACTQSDKEPGIAPFATDNDTDGERIVVPHTQGISASREDEIVPEIKTCKLSQPDPAPSEKKFNRLSLSKRKKEARDEKVEKVQGGHEHRQKDQPKKMVQDHSQFRGQQKEGRNGFDQCLVWVQCSFPNCEKWRRLRGNIDPSVLPDNWSCDQNTDLEYNHCDIPEETWTGCENDVAYASYVPGSIIWAKQYGYPWWPGMIESDPDLGEYFLFASHLDSLPSKYHVTFFGETVSRAWIPVNMLKNFQELSLEQAGVKKGRKKDCSQKLGAALMMAQEAEQISIQERVNVFGFQSRYNGSDSGEERDVMLSGANSPDSCLEEEEEEE…
Globicephala melas	Placental	XP_030701782.1	MMTTLQSKECGKGPKKTFAPPAQKLHSLMPYNLNSSKEEILGISSPEAETRPSLLKARLEKKKKKTTKENGTSSGQEIKGKAQDSKKAEKKEKGKSTLTNAEFEEIVQIVLQKSLQECLGMESSLDFAETSCAQPTRCTQLDKEPGIASSTTDNNSADGERVVVPHILEISASQEGGVIPEIKTSKPGQPDPAPSEKKFNKLSLSKRKKAAQNEKMEKAQSGHEHRQKDQLKKTVQDHSQIRDQQKGEGSGFGQCLVWVQCSSPNCEKWRRLRGNIDPSVLPDNWSCDQNTDLEYNHCDIPEETWTGHENEVAYASYIPGSIIWAKQYGYPWWPGMVESDPDLGEYFLFASHLDSLPSKYHVTFFGETVSRAWIPVNMLKNFQELSLELAAVKKCKNKD…
Gopherus evgoodei	Turtle	XP_030402883.1	MKKTFAPPLAKSHVLSSRKGPEHHGKKEDARAKEAITHPLSQGMSYSSETKLKEDHPNTEVKRWKKSRVAKEEDTGHVKGPATPQDVEKRLKRNLTKASAKEMCHLTDLQFEEIVQSVLQKSLQECMEESKRPFHQAEATKAAEPQGLKKETFETSRPAGNLVPYSNEPKGTVSAVDLKDPLPKAKKRNKLSLNKMRKETHEGPEANKERRKRHRKGEPKKIVQGYTLITDQEETEEGGESAFNQCVAWVQCSYPSCEKWRRLSSDTDPSVLPEDWTCSQNTDPQYKSCDVPEETWSGSENEVVYATYVPGSIIWAKQFGYPWWPAMVECDPDIGEYFLFSSRLDSLPSKYHVTFFGQSISRAWISATMLRNFHEFSTESLGLKTLRSKDYRQKLVSAV…
Gorilla gorilla	Placental	XP_018887005.2	MMTTLQNKEECGKGPKRIFAPPAQKSYSLLPCSPNSPKEETPGISSPETEARISLPKASLKKKEEKATMKNVPSREQEKKRKAQINTQAEKKEKEKSSLTNAEFEEIVQIVLQKSLQECLGMGSGLDFAETSCAQPVVSTQSDKEPGITASATDTDNANGEEVPHTQEISVSWEGEAAPEIRTSKLGQPDPAPSKKKSNRLTLNKRKKEAQDEKVEKTQGGHEHRQEDQLKKTVQDHSQIRDQQKGEINGFGQCLVWVQCSFPNCGKWRRLCGNIDPSVLPDNWSCDQNTADVQYNRCDIPEETWTGLESDVAYASYIPGSIIWAKQYGYPWWPGMIESDPDLGEYFLFTSHLDSLPSKYHVTFFGETVSRAWIPVNMLKNFQELSLELSVMKKRRNDC…
Grammomys surdaster	Placental	XP_028633665.1	MMATLQNHKVSLEYEKETKKTFAPPTQKSHSKKPQPNSWKEDIPGTSSPEAEINPSLLKANLKKEQKATTENGPSRGQEKKQKAQDQPAEKTGKEKTTLTSAEFEEIFQIVLQKSLQECLETSCVQRIRPTKSDKEPDIAPSTSDKETAGLKKIIIPDTPKMASSLEEEVSSEMGTSKLGQPVTEPSKKKSNRLSVSKQRKKAEDEKMEKIQDGREFSLKEKQKIVIQDRSQISGHQKEEEGGFGHCVIWVQCSSPKCEKWRQLRGNIDPSVLPDDWSCDQNPDLNYNRCDIPEESWAGCESDVAYASYVPGSIIWAKQYGYPWWPGMIEPDPDLGEYFLFASHLDSLPSKYHVTFFGETVSRAWIPVRMLKNFQELSLELARVKKRKNKDSNQKLEAA…
Heterocephalus glaber	Placental	XP_021110169.1	MMATLQKKEECGKGPKKTFAPPTQKLHSMIPCSPDSPKETLEIGSPEAEVKPNQPKPRLGKREKKAAIENGPSLGRKKRKAQDNKSAEKNEKEKLILTNAEFEEIVQIVLRKSLKECLGMGSGLNFAETSCVNPTVCIHSDKEVGIAASAATDNDNASGERVMVPQVPEISASLEDEVTPEIRPSEPGQAILAPSEKKLNRLYLSKRKKEARPCIVWVQCSSPNCKKWRQLCKNMDPSVLPDNWFCHQNTDLNYNCCDIPEETWTGRESEVVYASYVPGSIVWAKQYGYPWWPGMIESDPDLGEYFLFASHLDSMPSKYHVTFFGKTVSRAWIPVNMLKNFQELFLEQTGVKKCRNKDYIQKLEVAIIMAHKAQQTGIQDRVNLFGFWSRYCGSDSNEE…
Hipposideros armiger	Placental	XP_019485483.1	MMTTLQSKEEYGKGPKKTFAPPAQKLHSLMSYSPNSPKEETLGISSPVVQARPNLLKARLEKKKKKAKATTKNGPSSGQEKKVKAQDNKQAEKKKKEKSSLTNAEFEEIFQLVLQKSFQQSLGMESSLDFTETSCAQPLRCTQLDKEPGIASTTDNDNADGERVMVPHILEISASQEDGVIPEIKTSQPGQPAPAPPKKKFNRLSLSKRKKEAQDEKMKKAQSGHEHRQKDQSKKMVQVHSQIMDQQKEEESGFGQCLVWVQCSFPNCEKWRRLHGNIDPAILPNNWSCEQNTDLEYNRCDIPEESWTGCESDVAYASYIPGSIIWAKQYGYPWWPGMVESDPDLGEYFLFASHLDSLPSKYHVTFFGKTASRAWIPVNMLKNFKDLSLELAGVGKVCW…
Homo sapiens	Placental	XP_006716098.1	MMTTLQNKEECGKGPKRIFAPPAQKSYSLLPCSPNSPKEETPGISSPETEARISLPKASLKKKEEKATMKNVPSREQEKKRKAQINKQAEKKEKEKSSLTNAEFEEIVQIVLQKSLQECLGMGSGLDFAETSCAQPVVSTQSDKEPGITASATDTDNANGEEVPHTQEISVSWEGEAAPEIRTSKLGQPDPAPSKKKSNRLTLSKRKKEAQDEKVEKTQGGHEHRQEDRLKKTVQDHSQIRDQQKGEISGFGQCLVWVQCSFPNCGKWRRLCGNIDPSVLPDNWSCDQNTADVQYNRCDIPEETWTGLESDVAYASYIPGSIIWAKQYGYPWWPGMIESDPDLGEYFLFTSHLDSLPSKYHVTFFGETVSRAWIPVNMLKNFQELSLELSVMKKRRNDC…
Ictidomys tridecemlineatus	Placental	XP_021584220.1	MMTTLQKKEECGKGSKKPFAPPTQKLHSMIPHGPNSHRDETLGISSPVAEAKASPPKARLEKEEKATTEDGPGVGQEKKGKAQDKPAEKKEKGKSSLTNAEFEEIVQIVLQKSLQECLGTACGMGSGLNFAETTCVQTNSQSDKEPGIASATDNDNAVGEWKMIPHTPETSASVEDVPEIRTSKSAQLVPAPSEKKFNRLSLSKRKREAQDEKMEKVQGGHECREKDHPEKIIQGDSQIRGQQKGEESGFGQCLVWVQCSSPNCEKWRRLRGNIDPSVLPDNWSCDQNTGGKNLDYNRCDIPEEIWTGRESDVAYASYVPGSIIWAKQYGYPWWPGMVESDPDLGEYFLFASHLDSLPSKYHVTFFGETVSRAWIPVNMLKNFQELSLELAGMKKCRNK…
Jaculus jaculus	Placental	XP_012806046.1	MMAALQNNEEYEKVPKKTFAPPTQKWHSIMPPGPNSYKEDTLGISSPQAEANPNPPKASLKRKEQKAATQNGLSRGQEKKQKVQDKTPSEKHRKGKATLSNAEFEEIVQTVLQKTLQECLGMGTDLNFAETSYFQRIVCIQSDREPGIVASGSDNDNTDGERVMAPDNTEIPACLEDKVDLDIQTSELGQVAPALAKKKFNRPNLSKRKKEAQDESMEEMQDRHVLKQKDQQRTMTKDRSQIRGQQNKEESGFGQCIVWVQCSYPTCEKWRRLHRNIDPSVLPDNWSCDQNPDLDYNRCDIPEETWIGCESDVVYASYVPGSIIWAKQYGYPWWPGMVESDPDLGEYFLFASHLDSLPSKYHVTFFGETACRAWIPVNMLKNFQELSQELATMKKCKNK…
Lagenorhynchus obliquidens	Placental	XP_026981749.1	MMTTLQSRECGKGPKKTFAPPAQKLHSLMPYNLNSSKEEILGISSPEAETRPSLLKARLEKKEKTTKENGTSSGQEIKGKDQDSKKAEKKEKGKSTLTNAEFEEIVQIVLQKSLQECLGMESSLDFAETSCAQPTRCTQLDKEPGIASSTTDNNSADGERVVVPHILEISASQEGGVIPEIKTSKPGQPDPAPSEKKFNKLSLSKRKKATQNEKMEKAQSGHEHRQKDQLKKTVQDHSQIRDQQKGEGSGFGQCLVWVQCSSPNCEKWRRLRGNIDPSVLPDNWSCDQNTDLEYNHCDIPEETWTGHENEVAYASYIPGSIIWAKQYGYPWWPGMVESDPDLGEYFLFASHLDSLPSKYHVTFFGETVSRAWIPVNMLKNFQELSLELAAVKKCKNKDF…
Latimeria chalumnae	Coelacanth	XP_005999849.2	MAGLYSSMYRQRGSTVRGKPVGKKGSFVPPVLKAGTTGSERKNEDGPLEKPVPKKPKTGPEAEKRPEAPEAAAQEKTKVRKKKLGENPKKIKDGKVAGGGRHKESEKKGAEKALTVQDTEGELHGDGKQTKKVQLQARCPLSDSQYNELFQSVLQKTLEERMASRKATLGEESLSQNPAGTELTGLDSGLPQPSMDKVVNMQNAGVPVLAPRTTGTESEGKKINKLSLKKRKKEEKTTKVYKEEGRKHSRKGKPRKLNLSETGDQEDPSENETTISHGAAWVQCSRAQCGKWRRLRDSMDPSTLPEDWTCSQNADAEFRSCGAPEEAFSGSEDGIIYTELIPGSLVWARQYGYPWWPGMVEPDPNVGDYLLFTSQLHQMPAKYHITFLGDAVSRAWISA…
Lipotes vexillifer	Placental	XP_007468922.1	MMTTLQSKEECRKGPKKTFAPPAQKLHSLMPYNLNSSKEEILGISSPEAETRPSLLKARLEKKKEKTTKENGTGSGQEIKGKAQDNKKAEKKEKGKSALTNAEFEEIVQIVLQKSLQECLETSCAQPTRCTQLDKEPGIASSTTDNNNADGERVVVPHILEISASQEGGVIPEIKTSNPGQPDPAPSEKKFNKLSLSKRKKAAQNEEMEEAQSGHEHRQKEQLKKTVQDHSQIRDQQKGEGSGFGQCLVWVQCSSPNCEKWRRLRGNIDPSVLPDNWSCDQNTDLEYNHCDIPEETWTGHESEVAYASYIPGSIIWAKQYGYPWWPGMVESDPDLGEYFLFASHLDSLPSKYHVTFFGEKVSRAWIPVNMLKNFQERSLELAGVKKCRNKDFSQKLGAA…
Loxodonta africana	Placental	XP_023397513.1	MTTLQNKEECGKEPRKTFAPPTQKLCRLMPSSPNSLKVDTLRISSPEVESNPSLPKARLEKKNEKATTENGQGSDQEKKGKDQYNKQPKKKAEKERGSLTNAEFEEIVQIVLRKSLQECLGSGLGLAETACAQPIACTQSDKEPEIASVTVDNDNAEGERLIVPHTPEISASQENGVVREINASKPGQPDPPPSEKKFDKLSLNKRKKEARNEELEKFRGEHEHRQKDQPKKTVQNHSQIRDQQKREGGGFGQCLVWVQCSSPNCEKWRRLHRNIDPSALPDNWSCDQNTDLEYNSCDIPEETWTGHESDVAYASYIPGSIIWAKQYGYPWWPGMVESDPDLGEYFLFASHLDSLPSKYHVTFFGETVSRAWIPVNMLKNFQELSLELAGVKKCRNKDC…
Lynx canadensis	Placental	XP_030155826.1	MMATLQSKEEHGKGSKKTFAPPVQKMHSLMCYSPNSPKEETLGISSSKDRLEKKEEKATTENGPSSGQEKKGKAKDKKAEKKAKEKLSLTNAEFEEIVQIVLRKSLQECLETSCAQPIRRTQLDKEPGIASSTDNDNADGEKVMVPHILEISATKEAGVTSVIETSKPGQPDPPPSEKKFNRFSLSKGKKGAQDEKMEKAQSGREPRQKAQLKKTVQNHSQIRNQQKGEGSGFGQCLVWVQCSSPNCEKWRRLCGNIDPSVLPDNWSCDQNTDLKYNRCDIPEESWIGHESDVAYASYIPGSIIWAKQYGYPWWPGMVESDPDLGEYFLFASHLDSLPSKYHVTFFGETVSRAWIPVNMLKNFQELSLELAGVKRCRNKDCSQKLGVALTMAQEAEQIS…
Macaca fascicularis	Placental	XP_015302631.1	MFHKFHVITFLSECGKGPKRIFAPPAQKSYSLLPCSPNSPKEETLGISSPETEASISLPKASLKKEEEKATTKNGPSRGQEKKRKAQNNKQAEKKEKEKSSLTPAEFEEIVQIVLQKSLQECLGMGSGLDFAETSCAQPIVSNQSAKEPGITASATDTDNANGEEVPHTQEISVSWEGEAAPEIRTSKLGQPDPVPSKKKSNRLTLSKRKKEAQDEKVEKTQSGHEHRQEDQLKETVQDHSQITDLQKGEISGFGQCLVWVQCSFPNCGKWRRLCGNIDPSVLPDNWSCDQNTADVQYNRCDIPEETWTGLESDVAYASYIPGSIIWAKQYGYPWWPGMIESDPDLGEYFLFTSHLDSLPSKYHVTFFGETVSRAWIPVNMLKNFQELSLELSGMKKRR…
Macaca mulatta	Placental	XP_014989931.2	MMTTLQNKEECGKGPKRIFAPPAQKSYSLLPCSPNSPKEETLGISSPETEASISLPKASLKKEEEKATTKNGPSRGQEKKRKAQNNKQAEKKEKEKSSLTPAEFEEIVQIVLQKSLQECLGMGSGLDFAETSCAQPIVSNQSAKEPGITASATDTDNANGEEVPHTQEISVSWEGEAAPDIRTSKLGQPDPVPSKKKSNRLTLSKRKKEAQDEKVEKTQSGHEHRQEDQLKETVQDHSQITDLQKGEISGFGQCLVWVQCSFPNCGKWRRLCGNIDPSVLPDNWSCDQNTADVQYNRCDIPEETWTGLESDVAYASYIPGSIIWAKQYGYPWWPGMIESDPDLGEYFLFTSHLDSLPSKYHVTFFGETVSRAWIPVNMLKNFQELSLELSGMKKRRNDC…
Macaca nemestrina	Placental	XP_024653808.1	MMTTLQNKEECGKGPKRIFAPPAQKSYSLLPCSPNSPKEETLGISSPETEASISLPKASLKKEEEKATTKNGPSRGQEKKRKTQNNKQAEKKEKEKSSLTPAEFEEIVQIVLQKSLQECLGMGSGLDFAETSCAQPIVSNQSAKEPGITASATDTDNANGEEVPHTQEISVSWEGEATPEIRTSKLGQPDPVPSKKKSNRLTLSKRKKEAHEKVEKTQSGHEHRQEDQLKETVQDHSQITDLQKGEISGFGQCLVWVQCSFPNCGKWRRLCGNIDPSVLPDNWSCDQNTDVQYNRCDIPEETWTGLESDVAYASYIPGSIIWAKQYGYPWWPGMIESDPDLGEYFLFTSHLDSLPSKYHVTFFGETVSRAWIPVNMLKNFQELSLELSGMKKRRNDCSQ…
Mandrillus leucophaeus	Placental	XP_011841215.1	MMTTLQNKEECGKGPKRIFAPPAQKSYSLLPCSPNSPKEETLGISSPETEASISLPKASLKKEEEKATTKNGPSRGQEKKRKAQNNKQAEKKEKEKSSLTRAEFEEIVQIVLQKSLQECLGMGSGLDFAETSCAQPIVSNQSAKEPGITASATDTDNTNGEEVPHTQEISVSWEGEAAPEIRTSKLGQPDPVPSKKKSNRLTLSKRKKEAHEKVEKTQGGHEHRQEDQLKETVQDHSQIRDLQKGEISGFGQCLVWVQCSFPNCGKWRRLCGNIDPSVLPDNWSCDQNTDVQYNRCDIPEETWTGLESDVAYASYIPGSIIWAKQYGYPWWPGMIESDPDLGEYFLFTSHLDSLPSKYHVTFFGETVSRAWIPVNMLKNFQELSLELSGMKKRRNDCSQ…
Manis javanica	Placental	XP_017499701.1	MMATLQSKEECGKGPKKIFAPPVQKLHSLMSYSLNSPKEETLGINSPAAEARPSLPKARLEKKKEKATSENGPSNGQEKKGKVQDKRAVKKGKEKASLTNDEFEEIVQIVLQKSLQECLETSCAQPIRSTQLDKEPGIAPPTTDNAHANGGRITGPDILELSASQEDGVIPEIKTSKTGQPDPVSSEKKFSRLSLSKRKKEAQDKVEKTQSGHEHKQKDQPKKIVRDHSHIREQQKGEESGFGQCQVWVQCSSPNCEKWRRLCGNIDPSVLPVNWSCDQNTDLEYNCCDIPEETWTGRESDVAYASYIPGSIIWAKQYGYPWWPGMVESDPDLGEYFLFASHLDSLPSKYHVTFFGERVSRAWIPVNMLKNFQELSLELTGVKNCRNKDCSQKLGAALM…
Marmota flaviventris	Placental	XP_027808738.1	MPYSPPPHPRTDPNASAHHPAPAHEAPGPADGSHAGPPGAPCDFAPPCMKASVGGEMDSAHLGSLAPALGKPRFDAVSPGRKKGKSSLTNAEFEEIVQIVLQKSLQECLGMGSGLNFAETSCVQTNSQSDKEPGIASATDNDNAVGERKMIPHTPETSASVEDVPEIRTSKSAQLVPAPSEKKFNRLSLSKRKREAQDEKMEKVQGGHECREKDQPEKMIQGDSQIRGQQKGEESGFGQCLVWVQCSSPNCEKWRRLRGNIDPSILPDNWSCDQNTDLDYNRCDIPEEIWTGRESDVAYASYVPGSIIWAKQYGYPWWPGMVESDPDLGEYFLFASHLDSLPSKYHVTFFGETVSRAWIPVNMLKNFQELSLELAGVKKCRNKDYSQKLVAAIMMAQKA…
Marmota marmota	Placental	XP_015346198.1	MTTLQKKEECGKGSKKPFAPPTQKLHSMIPHGPNSHRDETLGISSPVAEAKASPPKARLEKEEKATTEDGPGVGQEKKGKAQDKPAEKKEKGKSSLTNAEFEEIVQIVLQKSLQECLGMGSGLNFAETSCVQTNSQSDKEPGIASATDNDNAVGERKMIPHTPETSASVEDVPEIRTSKSAQLVPAPSEKKFNRLSLSKRKREAQDEKMEKVQGGHECREKDQPEKMIQGDSQIRGQQKGEESGFGQCLVWVQCSSPNCEKWRRLRGNIDPSILPDNWSCDQNTDLDYNRCDIPEEIWTGRESDVAYASYVPGSIIWAKQYGYPWWPGMVESDPDLGEYFLFASHLDSLPSKYHVTFFGETVSRAWIPVNMLKNFQELSLELAGVKKCRNKDYSQKLVA…
Mastomys coucha	Placental	XP_031247035.1	MGLVGFRSEDGAGLLPLRSRKIGFQLRMRVASERKPLGGGNNNNNNNKKELSVVAGSEARGTTRLSGSEGGEASTRSGILGTEYEKGTKKTFAPPTQKLHSEKPQPNSWNEDIPGTSSPEAETKPSLFKASLKKGQKTTTEHGPSRGQESHCVIWVQCSSPKCEKWRQLRGNIDPSVLPDDWSCDQNPDLNYNRCDIPEESWAGCESDVAYASYVPGSIIWAKQYGYPWWPGMIESDPDMGEYFLFASHLDSLPSKYHVTFFGETVSRAWIPVRMLKNFQELSLELAKVKKCKNKDSNQKLEAAIAMAHRAEQISIQERVNLFGFWSRYSGADISGEGKDLMLCESNNPESCPEKEEKDSEEEQEEKEEKKDPTLPRSKPARMQTKKPKSRGPAGGQDG…
Meriones unguiculatus	Placental	XP_021506338.1	MAMVQGNGEHEKGTKKTFAPPTQKSHSVKPQPKPWKEDSPGARSPEVEAKPSQLSASLEKKEQKAATENGPGRGREKKRKAHDKPAEKRGKEKTTLTNAEFEEIFQTVLQKSLQECLETSCVQRTIPTKADKEPGIAPSTTDNENADGEKEIVPASSPEEEVNSEIRTSELGQPATKPSKKKCNRLCLSKRKKKAENEKMEKIQDGHECTLRDKQKTMIQDHSQIKGQQKEEEGGFGHCLIWVQCSFPKCEKWRQLRGNIDPSVLPDNWSCDQNPDLNYNRCDIPEETWTGRESDVAYASYVPGSIVWAKQYGYPWWPGMIESDPDLGEYFLFASHLDSLPSKYHVTFFGEAVSRAWIPVSMLKNFQELSLELARVKKGRNKDYNQKLEAAITMAHKAE…
Mesocricetus auratus	Placental	XP_021088779.1	MMATLRNNEEYEKGTKKTFAPPTQKSHNVKTQADSWKEDTQGTSSPEAEAKPSQPKTSSKKEQKTTTEHGPSRGQKKRKAQDKPAEKKGKEKQTLTDAEFEEIFQTVLRKSLQEYLETSCVQPIIPTKSDKEPGITSPATDNESADGEKVIVPDTPEIASSLEEDVNSEIRTSKPGQLAAEPSKKKINRLSLSKRKKKAEDEKMDEIQDECSLKDKQKTMIQGPSQIRDQQEEEEKEGGFGQCLIWVQCSSAKCEKWRQLRGDIDPSVLPDNWSCDQNPDLNYNRCDIPEETWTGCESDVAYASYVPGSIIWAKQYGYPWWPGMIETDPDLGEYFLFASHLDSLPSKYHVTYFGETVSRAWIPVSMLKNFQELSLELARGKKCRNKDYNQKLEAAIAMA…
Microcaecilia unicolor	Amphibians	XP_030043910.1	MATLKNKEECRKATKKKFTSPGSKPLTTTLSSESLASSGRKWGTTWPLAAKGGLMASRKAEEEESSAKVEEEEKMIDGEKKWKGTEKPEGIMQDTDDKENVENDEMGRKKKESKKTEKEKCYITDSQYQELFQSVLQKSLEECLDDCKKPCCRVGLGENAEKKTAKRECSRLPVAGVEAISKKLPLAHANAASVMSLKLQQEECEPVGQKSSKLSLSKKRRKKMEEGSKMENKRSRKGQPKKIVPGYTQITDQEEADECLNQCIAWVQCSLENCQKWRRLESSIDPSSLPENWSCSENLDLKYSTCDVPEETWSGSEPDVIYATFIPGSIVWAKQYGYPWWPGMVESDPDIGDYFLFTSQLDQLPSKYHITFLGDYVSRAWIPTSMLKNFKEMSADGTG…
Microcebus murinus	Placental	XP_012614832.2	MMTTLQNKEECGKRPKKIFAPPVQKLHSLILCSTNSPKEETLGISSPETETRPHLPKARLEKKEEKATTENGPSSGQKKKGKAQDNKQVEKKAKEKSSISNEEFEEIVQIVLRKSLQECLGMGSGFDFAETSCAQPIVCTQSDKEPAITASATDNDTADREKVMVPHTPEIPASQDNDVVSAISTSKLGQPDLAPSGKKFNRLPLSKRKKEAQDEKMEKVQGGHEHRQKDQRKKMVQDHSHIRNQQKRKQSGFGQCLIWVQCSSPNCEKWRRLRGNIDPAVLPDNWSCDQNTDLEYNSCDIPEETWTGHESDIAYASYIPGSIIWAKQYGYPWWPGMVESDPDLGEYFLFASHLDSLPSKYHVTFFGETVSRAWIPVNMLKNFQELSLELAGVKKCRNK…
Microtus ochrogaster	Placental	XP_005371516.1	MMAALQNDKEYEKGTKKNFAPPTQKSHSVKQLNSWKEDTLGTNSQEAEAKPSRPKASSKKERKKATEQGPGGGQENKPAEKKGKEKPTLTNAEFEEIFQIVLQKSLQEYLETSCVQPMTPTKSDKESGVAPSATENENADGEKVIVPGTPKMASSLEEEVNSEIKTSKPGQLVTEPSKKKFNRLCLNKRKKKAEDEKMETIQDGRECSLKDKQKTMSQDHSQIRGQKEEEGGFGQCLIWVQCSFPKCEKWRQLRGDIDPSVLPDNWSCDQNPDLNYNRCDIPEETWTGCESDVAYASYIPGSIIWAKQHGYPWWPGMIEPDPDLGEYFLFASHLDSLPSKYHVTYFGETVSRAWISVSMLKNFQELSLELSKVKKCRNKDYSQKLEAAITMAHEAEQIN…
Miniopterus natalensis	Placental	XP_016073351.1	MMTTLHSKEEYGKGSKKTFTPPAQKLHSLMPYNPNLPKEKTLGISSLEAESRANLLKARLEKKEEEETTENGPSSCQEKKVKAQDNKQAEKKEKEKSSLTNEEFEEIVQIVLQKSLQQCLGIESSLNFAETSCVQPIRCTQLDKEPAIASSTDNDNADRERVMVPHILAILASQEDGIISEINTSKPGQPDPALSEKKFGKLSLRKRKKAQDEKMKKAQHGHEHRQKDQPKKIVQDHSQMRDQRKGEESGFGQCLVWVQCSSPNCEKWRRLHGNIDPSVLPDNWSCDQNTDLEYNRCDIPEETWIGRESDVAYASYIPGSIIWAKQYGYPWWPGMIESDPDLGEYFLFASHLDSLPSKYHVTFFGETVSRAWIPVNMLKNFQELSLELAGVKKFKNKDC…
Monodelphis domestica	Marsupial	XP_007483373.1	MHANQVRGRLPKPQGLTLAMVTSPLGGQRALRRALPLRRAPTLFKQREKPASKLNDDDLKEQGKLLETPYPPITLASKEEGIVPGTQSSKSDILPSEKKQNTLPLSNKKKEENKEKTKLTQESCKHRRKGQSRKIVQGYTQISDQEESGGEWAGNFGIAWVQCSFPSCEKWRQLHGNINSSSILPDNWSCSQNTGGQLDPDLGEYFLFTSQQDVLPAKYHVTFFGNSVSRAWISSNMLKNFQELSLEQVERDQVSLFGFSSRCKENASEPDSSEEEGDIFFKETKKTQSTGSSNSGFSKEESKVTHLSSQILFLSVAQPWWQPSLVLRLSMLPSGFGISFGQVTPFKMPFSSSKKQRSLPLKG
Monodon monoceros	Placental	XP_029078155.1	MMTTLQSKEEFGKGPKKTFAPPAQKLHSLMPYNLNSSKEEILGISSPEAETRPSLLKARLEKKKEKTTKENGTGSGQELKGKAQDNKKAEKKEKGKSTLTNAEFEELVQIVLQKSLQECLGMASSLDFAETSCAQPTRCTQLDKEPGIASSTTDNNNADGERVVVPHILEISASHEGGVIPEIKTSKPGQPDPAPSEKKFNKLSLSKRKKAAQNEKMEKAQSGHEHRQKDQLKKTVQDHSQIRDQQKGEGSGFGQCLVWVQCSSPNCEKWRRLRGNIDPSVLPDNWSCDQNTDLEYNHCDIPEETWTGHENEVAYASYIPGSIIWAKQYGYPWWPGMVESDPDLGEYFLFASHLDSLPSKYHVTFFGETVSRAWIPVNMLKNFQELSLELAAVKKCRNK…
Mus caroli	Placental	XP_021018908.1	MMAALQTHKEYEKGTKKTFAPPTQKLHSKKPQPSSWKEDTPGTSSPEAETKPSLLKASLKKEQKATTEHGPNRGQEKKLKAQDQPAKKKGKEKTLTNAEFEEIFQIVLQKSLQECLETSSCVQHIRPTKLDEEPGIVPPATDKKNAEPEKVVTPDTPKIASSLEEEVNSEMGTSKLGQPVTEPSKKKFNRLSLSKQKEKAADEKMEKIQDGRECSLKEKQKIVIQDQSQIRGHQKEEESGFGHCVIWVQCSSPKCEKWRQLRGNIDPSVLPDDWSCDQNPDPNYNRCDIPEESWAGCESDVAYASYVPGSIIWAKQYGYPWWPGMIEADPDLGEYFLFASHLDSLPSKYHVTFFGETVSRAWIPARMLKNFQELSLELVKKCKNKNSNQKLEAAIAMAH…
Mus musculus	Placental	NP_001005426.2	MMAALQTHKEYEKGTKKTFAPPTQKLHSEKPQPSSWKEDAPGTSSPEAETKPSLLKASLKKEQKPTTEHGPNRGQERKLKAQDQPAKKKGKERTLTSAEFEEIFQIVLQKSLQECLETSSCVQHIRPTKLDEEPGIVPPATDKKDADPEKVITPDTPKIASSLEEEVNSEMGTSKLGQPVTEPSKKKFNRLSLSKQKKKAEDEKMEKIQDGRECSLKEKQKIVIQDQSQIRGPQKEEESGFGHCVIWVQCSSPKCEKWRQLRGNIDPSVLPDDWSCDQNPDPNYNRCDIPEESWAGCESDVAYASYVPGSIIWAKQYGYPWWPGMIEADPDLGEYFLFASHLDSLPSKYHVTFFGETVSRAWIPVRMLKNFQELSLELVKKCKNKNSNQKLEAAIAMAH…
Mus pahari	Placental	XP_021042862.1	MDREFINSFHLLPLYPQEFWEKTLTNAEYEEIFQTVLQKSLRECLETSSCXQHIRPTKSDEKPGIVPSVTDKKNADPEKVVTPETPKIASSLEEEVNSEMGTSKLGQPVTEPSKKKFDRFSLSKQKEKAEDEKMEKIQDGHECTLKEKQKIVIQDQAQIRGHQKGGDSGFGHCVIWVQCSSPKCEKWRQLRGDIDPSVLPDDWSCDQNPDLNYNRCDIPEESWAGCEGDVAYASYVPGSIIWAKQYGYPWWPGMIEADPDLGEYFLFASHLDSLPSKYHVTFFGETVSRAWIPVRMLKNFQELSLELARVKKCKNKDSNQKLEAAIVMAHRAEQTSIQERVNLFGFWSRYNGADISGEGKGRKRDGG
Mustela erminea	Placental	XP_032184414.1	MTSLQSKEACGKGPKKTFAPPAPKLHSLMCYSPKPPKEDTVGISSPNARLEKKEEKATTENGPSSGQENKGKPQDKQVEKKEKERSSLTSAEFEEIVQIVLRKSLQECLETSCAQPIRCTQLDKEPGVASSTENDNADGERVMVPHILEISATKEAGVSSVIKTSKPGQPDPVPSEKKFNRTSLSKGKKGAQDDKMEKAQNTHEQRQKDQLKKPVQDDSQTRNQQKGEGSGFGQCLVWVQCSSPNCEKWRRLCGNVDPSVLPDNWSCDQNTDSRYNRCDIPEESWTGRETDVAYASYIPGSIIWAKQYGYPWWPGMVESDPDLGEYFLFASHLDSLPSKYHVTFFGETVSRAWIPVNMLKNFQELSLELARMKKCRNKDCNQKLGAALTMAQEAEQISI…
Mustela putorius	Placental	XP_012916465.1	MTSLQSKEACGKGPKKTFAPPAPKLHSLMCYSPKPPKEDTVGISSPKARLEKKEEKATTENGPSSGQENKGKPQDKQVEKKEKERSSLTSAEFEEIVQIVLRKSLQECLETSCAQPIRCTQLDKEPGIASSTENDKADGERVMAPHILEISATKEAGVSSVIKMSKPGQPDPVPSEKKFNRTSLSKRKKGAQDDKMEKAQNTHEQRQKDQLKKPVQDDSQTRNQQKGEGSGFGQCLVWVQCSSPNCEKWRRLCGNVDPSVLPDNWSCDQNTDSRYNRCDIPEECWTGRESDVAYASYIPGSIIWAKQYGYPWWPGMVESDPDLGEYFLFASHLDSLPSKYHVTFFGETVSRAWIPVNMLKNFQELSLELARMKKCRNKDCNQKLGAALTMAQEAEQISI…
Myotis brandtii	Placental	XP_005861206.1	MMTTLQSKEEYGKGSKKPFIPPAQKVHSLMPYNPNSHKEETLGISSLEAEAGPNLLKAKLEKKEEEATTVNGPCSDQEKKVKVQDNKQAEKKEKEKSNLTNEEFEEIVQIVIQKSLQECLGMAYETSCAQPIRHTQLDKEPGIASSTTDNDNADREWVTVPHILEISASQEDGIIPSKPDQPDLASSEKKFSKLSLRRRKKKAQDEKMKKAQRGHEHKQKDQLKKMVQDHAQIRDQQKGEESGFGQCLVWVQCSSPNCGKWRRLHGNADPSVLPDNWSCDQNTDLEYNHCDIPEETWIGHESDVAYASYIPGSIIWAKQYGYPWWPGMVESDPDLGEYFLFASHLDSLPSKYHVTFFGETVSRAWIPVNMLKNFQELSLELAGVKKCRNKDCSQKLGAA…
Myotis davidii	Placental	XP_015420026.1	MMTTLQSKEEYGKGSKKPFIPPAQKLHSLMPYNPNSHKEETLGVSSLEAEAGPNPLKAKLEKKEEEATTVNGSCSDQEKKVKVQDNKQAEKKEKEKSNLTNEEFEEIFQIVIQKSLEECLGMAYETSCAQPIRHTQLDKEPGIASSTTDNDNADREWVTVPHILEISASQEDGIIPSKPGQPDLASSEKKFSKLSLRRRKKKAQDEKMKKAQRGHEHKQEDQLKKMVQDHVQIRDQQKGEESGFGQCLVWVQCSSPNCGKWRRLHGNADPSVLPDNWSCDQNTDLEYNHCDIPEETWIGHEGDVAYASYIPGSIIWAKQYGYPWWPGMVELDPDLGEYFLFASHLDSLPSKYHVTFFGETVSRAWIPVNMLKNFQELSLELAGVKKCRYKDCSQKLGAA…
Myotis lucifugus	Placental	XP_023609932.1	MMTTLQSKEEYGKGSKKPFIPPAQKVHSLMPYNPNSHKEETLGISSLEAEAGPNLLKAKLEKKEEEATTVNGPCSDQEKKVKVQDNKQAEKKEKEKSNLTDEEFEEIVQIVLQKSLQECLGMAYETSCAQPIRHTQLDKEPGIASSTTDNDNADREWVTVPHILEISASQEDGIIPSKPDQPDLASSEKKFSKLSLRRRKKKAQDEKMKKAQRGHEHKQKDQLKKMVQDHAQIRDQQKGEESGFGQCLVWVQCSSPNCGKWRRLHGNADPSVLPDNWSCDQNTDLEYNHCDIPEETWIGHESDVAYASYIPGSIIWAKQYGYPWWPGMVESDPDLGEYFLFASHLDSLPSKYHVTFFGETVSRAWIPVNMLKNFQELSLELAGVKKCRNKDCSQKLGAA…
Nannospalax galili	Placental	XP_008830590.1	MGNIWQSFGHISSEYEKGPKKTFVPPTQKSHSVKPPDANLLMENTPGISSPEAEAKRSPPQVSLKKKRKKNKKKAATENGASRDQEKKQKARGKPGEKKRKEKSTLTNEEFEEIFQTVLKKSLQECLESSCVQSTMHSQPDKEQGFTSSATGNENADGEMAIASETPKISSSLDDKVVSEISTLKLDQPVPEPPKKKFNRLSSNKRKKKTESSCVQPRMYSQPDKEPGFTSSATGNENDDGEMAIASETPEISSSLDNKVVSEIRTLKLDQPVPEPPKKKFNRLPLNKRKKKTENEDEKMESIQDGHEHRLEVLQKATIKDPSQIRSQQKEEKNGFGQCLVWVQCSFPKCEKWRRLLGNTDPSVLPDNWSCDQNPDVNYNRCDIPEETWTGCESDVTYA…
Neomonachus schauinslandi	Placental	XP_021535707.1	MRTLSVLDSVFHKFHLIIKFLSECGKGPKKTFAPPAQKLHSLMCYSPNPPKEETLEISSPKARSEKKEEKATTENGPSGGQENKGKPQDKQAVKKEKERASLTNAEFEEIVQIVLRKSLQECLDTSCAQPIRCTQLDKEPRIASSTDNDNADGERVMAPHILEISATEEAGVTSVIKRSKPGQPDPAPSEKKFNRSSLSKGKKGAQDEKMEKAQSGHEQRQKDQLKKTVQDDSQTRNRQKGEGGGFGQCLVWVQCSSPNCEKWRRLCGNIDPSVLPDNWSCDQNTDLRYNRCDIPEESWTGRESDVAYASYIPGSIIWAKQYGYPWWPGMVESDPDLGEYFLFASHLDSLPSKYHVTFFGETVSRAWIPVNMLKNFQELSLELAGVKKCRNKDCNQKLG…
Neophocaena asiaeorientalis	Placental	XP_024601189.1	MTTLQSKEEFGKGPKKTFAPPAQKLHSLMPYNLNSSKEEILGISSPEAETRPRLLKARLEKKKEKTTKENGTGSGQEIKGKAQDNKKAEKKEKGKSTLTNAEFEEIVQIVLQKSLQECLESSCAQPTRCTQLDKEPGIASSTTDNNNADGERVVVPHILEISASQEGGVIPEIKTSKPGQPDPAPSEKKFNKLSLSKRKKAAQNEKMEKAQSGHEHRQKDQLKKTVQDHSQIRDQQKGEGSGFGQCLVWVQCSSPNCEKWRRLRGNIDPSVLPDNWSCDQNTDLEYNHCDIPEETWTGQENEVAYASYIPGSIIWAKQYGYPWWPGMVESDPDLGEYFLFASHLDSLPSKYHVTFFGETVSRAWIPVNMLKNFQELSLELAALKKCRNKDFSQKLGAAL…
Nomascus leucogenys	Placental	XP_030653117.1	MFHKFHLITFLSECRKGPKRIFAPPAQKSYSLLPCSPNSPKEETLGISSPETEARISLPKASLKKKEEKATMKNVPSREQEKKRKAQINKQAEKKEKEKSSLTNAEFEEIVQIVLQKSLQECLGMGSGLDFAETSCAQPIVSTQSDKEPGITASATDTDNANGEEVPHTQEISVSWEGEAAPEIRTSKLGQPDPAPSKKKSNRLTLSKRKKEAQDEKVEKTQGGHEHREEDQLKKTVQHHSQIRDQQKGEISGFGQCLVWVQCSFPNCGKWRRLCGNIDPSVLPDNWYCDQNTADVQYNRCDIPEETWTGLESDVAYASYIPGSIIWAKQYGYPWWPGMIESDPDLGEYFLFTSHLDSLPSKYHVTFFGETVSRAWIPVNMLKNFQELSLELSVMKKRR…
Ochotona princeps	Placental	XP_012782932.1	MMATVQNKEECGKGPKKTFAPPTQKSHFLVPCDPKAPKTETLGVKAPEAKARPRPPKSRLEMNEEKADTENGSGIGQEQKGKTPEKKQNKQAVKKEKGRSSLTNAEFEEIVQIVLQKSLQEYEGMGSDFHFSDTSCAQSMVCTGSDKVPGNAASATGNDAVDGEKMIVIHAAETSAPQEDKAVPVFRGSKQGRPDPAPSEKKSNRPRLSKRKREAQDEKMESGQGGHEHRQKNEPKKMIQDLSQIRRVQEGENVKSGFGQYLVWVQCSSSNCEKWRRLHGNIDPSVLPDNWSCAQNPDLKYNSCDIPEESWTGRDSEVAYATYIPGSIIWAKQYGYPWWPGMVESDPDLGEYFLFASHLDLLPSKYHVTFFGETVSRAWIPVNMLKNFQELSLELTGMK…
Octodon degus	Placental	XP_023570087.1	MLLSISEKVMEKLILTDSEFEEIVQTVLRKSLKECFETSCVKPTVYIQSGKEPGIITSATNDDNASGEKVMVPHTPEISLSLEDEVTPEMSASGPGQAVPAPSEKKVDREYLSKRKKEAQGEKMETPKDGHEHRQRDQLKDMLWNHSQTKDQTKKRKRDGFGHCVVWVQCSSPNCRKWRRLCRNIDPSVLPDNWFCHQNTDLDYNCCDIPEETWTGNESEVVYASYIPGCIIWAKQYGYPWWPGMVESDPDLEEYFLFASHFDSLPSKYHVTFFGETVSRAWIPVNMLKNFQELSLEQTGVKKCRNKDYIQKLEVAVMMAHKAEQTDIEDRVNLFGFWNRYCGSDSNEEKQDLMLPGANSPESNVEKEDNELEVEEKEKKDPTLPGPKSAKMKTKNPKL…
Odobenus rosmarus	Placental	XP_012417372.1	MMTTLQSKEEYGKGPKKTFAPPAQKLHSLMCYSPNSPKEETLGISALKSRSEKKEEKATTENGPSSGQENKGKPQDKHAEKKEKERASLTNAEFEEIVQIVLRKSLQECLETSCAQPIRCTQLDKERGVSSSTDNDDADGERVMVPHILEISATEEAGVTSVRKTSKPGQPDPAPSQKKFNRPSLIKGKKRAQNEKMEKAQSGHEQRQKIQLKKTVQDDSQTRNQQKGEGGGFSQCLVWVQCSSPNCEKWRRLRGNIDPSVLPDNWSCDQNTDLRYNRCDIPEESWTGRESDVAYASYVPGSIIWAKQYGYPWWPGMVESDPDLGEYFLFASHLDSLPSKYHVTFFGETVSRAWIPVNMLKNFQELSLELAGVKKCRNKDCNQKLGAALTMAQEAEQIS…
Odocoileus virginianus	Placental	XP_020765190.1	MMPTLESKEKCGKGQKNTFAPPAQKLHSPMPYNLNSSKEEIPEISSPQAEVRPSLLKAGLEKKKEKTPTENGPVSGQEIKGKAQDSKKAKKEKKKSTLTSAEFEEIVQTVLRKSFQECLETSCTQPTRCTQLDKEPGIASSNTSDNNNADGDRVVVPPILEISASQEDGIIPEIKISKPGQPDSASSEKKVNKFSLSKRKKEAQDEKMETDQSGHEHRQDDQQKETIQDHSQDRDQQKGEGSGFGQCLVWVQCSSPNCEKWRRLHGNIDPSVLPDNWSCDQNTDLQYNRCDIPEETWTGHESDVAYASYIPGSIIWAKQYGYPWWPGMVEPDPDLGEYFLFASHLDSLPSKYHVTFFGETVSRAWIPVNMLKNFQELSLELNGLRKCKNKDCIQKLGLA…
Oncorhynchus kisutch	Bony fish	XP_031688551.1	METVAGQKEKAKFAPLVPREKKPGHGEKGGGKRSENKWKGEGGGNKERNIDVGKKTGESCEGERVVESKGKASGLEKKRGERMKKEGKKKTPDTEKVRAADEGVPQQQEGKGERGGGEGAKENKKQKNKDDLSRKETDKGKEGMNVKKKKKENEKVRKEGKETKKKRPRDETESNKVLPLTDSQYDDIFDSATALETPVDNCLEDARAVLSEVELLQATIDQVSLREEEQPPRKVSGERKTAASGSHTQRKRKRRREEEEDSDSSAEFDQWVQCSRSVCGKWRRVERHVDLAALPSDWTCIHDTGPGLCEATEDSWSGQECDVINSGLVPGSLVWAQQIGYPWWPAIVERDPDTKTFCQFNRNTDLYPCRYHVTYLGEPVSRAWVCRSKVRNYTELTED…
Oncorhynchus mykiss	Bony fish	XP_021437343.1	METVAGQKEKAKFAPLVPREKKPGHGEKGGGKRSENKWKGEGGGNKERNIDVGKKTGESCEGERGVESKGKASGLEKKRGERMKKEGKKKTPDTEKVRAADEGVPQQQEGKGERGGGEGAKENKKQKNKEDLSRKETDKGKEGMNGKKKKKENEKVRKEGKETKKKRPRDETESNKVLPLTDSQYDDIFDSATALETPVDNCLEDARAVLSEVELLQATIDQVSLREEEQPPRRVSGERKTAASGSHTQRKRKRRREEEEDSDSSAEFDQWVQCSRSVCGKWRRVERHVDLAALPSDWTCIHDTGPGLCEATEDSWSGQECDVINSSLVPGSLVWAQQIGYPWWPAIVERDPDTKTFCQFNRNTDLYPCRYHVTYLGEPVSRAWVCRSKVRTYTELTED…
Oncorhynchus tshawytscha	Bony fish	XP_024299114.1	MNLATSTEWALPIATSTEWALPIATSTEWALPMELAKQNALRSGGQKEKAKFAPLVPREKKPGHGEKGGGKRSENKWKGEGGGNKERNIDVGKKTGESCEGERVVESKGKASGLEKKRGERKKKEGKKKTPDTEKVLPLTDSQYDDIFDSATALETSVDNCLEDARAVLSEVELLQATIDQVSLREEEQPPRRVSGERKKRRREEEEDSDSSAEFDQWVQCSRSVCGKWRRVERHVDLAALPSDWTCIHDTGPGLCEATEDSWSGQECDVINSGLVPGSLVWAQQIGYPWWPAIVERDPDTKTFCQFNRNTDLYPCRYHVTYLGEPVSRAWVCRSKVRNYTELTEDAAITRRLSRFGFWTQQTSDRESSEDSEISEVLEMLLDHEKSRRSAYARNKKSA…
Orcinus orca	Placental	XP_012388193.1	MMTTLQSKEECGKGPKKTFAPPAQKLHSLMPYNLNSSKEEILGISSPEAETRPSLLKARLEKKKEKTTKENGTSSGQEIKGKAQDSKKAEKKEKGKSTLTNAEFEEIVQIVLQKSLQECLGMESSLDFAETSCAQPTRCTQLDKEPGIASSTTDNNSADGVVVPHILEISASQEGGVIPEIKTSKPGQPDPAPSEKKFNKLSLSKRKKAAQNEKMEKAQSGHEHRQKDQLKKTVQDHSQIRDQQKGEGSGFGQCLVWVQCSSPNCEKWRRLRGNIDPSVLPDNWSCDQNTDLEYNHCDIPEETWTGHENEVAYASYIPGSIIWAKQYGYPWWPGMVESDPDLGEYFLFASHLDSLPSKYHVTFFGETVSRAWIPVNMLKNFQELSLELAAVKKCKNKDF…
Ornithorhynchus anatinus	Monotremata	XP_028911819.1	MTSKDTTGRNKKEGGKGSKKTFRPPGNRPPAPVRPSPPQEGPRGDASPGKDAASDRARAGQPEKKEKGKMAKEQGPGGDSARGKKAGKEPEKKQAEPEKKRAEPEKKRAEPEKKRAEPEKKQVEPEKKRAKPGKKQAEPEKKQAEPEKKQAEPEKKRAEPEKKQVEPEKKQVEPEKKQVEPEKKRAKPGKKQVESEKKQVESEKKQAEPEKKQAEPEKKQVEPEKKQAEPKVKERKRLSDAEFEEIFQCVLQKSLRECLEASKRDIELEGDPEKTKEPRSVIAASPAEAAAASGGDGDDDEREMPRTPSPPETCLPQGAEDASRARSVEPGPPNSASAAGKSNQASADRKKKDTKDGSAAPAKPERKLSRRGRPKKVVQGYTQVSDQEVAYIGQRRSFS…
Orycteropus afer	Placental	XP_007954076.1	MMATLQNKEEYGKGPKKTFAPPVQKLHRLMPLSPNSLKEDTREISSPEAEATASLPKARLEKKNEKAHTENGPGSGQEERGKNLCNKQAEGKVEKERTSLTNAEFEEIVQIVLQKSLQECLGIGSDLGFAETSCVRPIGYTQSGKERGIASITAASDSADGSGKIPISIGKKTNQFVVWVQCSSPNCEKWRRLHGNIDPSTLPDNWSCAQNIVDREGYGVYEEKKIREIQWPGMVESDPDLGEYFLFASHLDSLPKKYKNKDCIQKLEAALKMAQEAEQVNIQAPMNVIDQISGMIGRVERRINKNLMLSGPNSSNSRFEKEEEVESEMEEEEEKKIEGPGPREPLCWEAGGAAPEDEASSDLDLEQLLEDVGEEPEPREESLRRDAGEDVTMALLEE
Oryctolagus cuniculus	Placental	XP_008256243.1	MMAAVQNKEECGKGPKKTFAPPIQKLHFLKPCGPKAPKEEALGPSSPEAEARPSLPKARLEMNEEKTTTENGPSSGQEKKGKPQDNKQNKQAEKKEKGRSSLTNAEFEEIVQTVLRKALQECEAACSCAPWEAAESSCAQLVVCTQSDKVPGIVASTGNDTADGERMMVIHTPEISAPQEDEVAPESRASKRGQPNPAPSEKKLSRPCLSKRKKEAQDEQVERVQGGHEHRQKDQPKKMIQDLSQIRGKQKEDKSGFGQYLVWVQCSSPNCEKWRRLHGNIDPSVLPDNWSCDQNTDLKYNSCDIPEETWTGCESEVAYATYIPGSIIWAKQYGYPWWPGMIESDPDLGEYFLFASQLDSLPSKYHVTFFGETVSRAWIPVNMLKNFQELSLELAGVKK…
Otolemur garnettii	Placental	XP_023374351.1	MGSGLDFAETSCAQPVVCTPSGKEPAITTSATDNDNTDREKIMVPHTPEISASQENEVISEIRTSKLGQLDPAPSEKKFNRFPVSKRKKEAQDEKMEKVQGRHENRQTDQLKKMVQDHSQIKKQQKEKQSGFGQCLIWVQCSSPNCEKWRRLHGNIDPSVLPENWSCDQNTDLEFNRCDIPEETWTGCESDVAYASYVPGSIIWAKQYGYPWWPGMVESDPDLGEYFLFASHLDSLPSKYHVTFFGETVSRAWIPVNMLKNFQELSLELAGMKKYKNKDCSQKLGAALMMAQEAEQINIQERVNLFGFRTRYSGSNSSGEGKDLMLSETNNPDSCWEKEEEEEKEEEKEEQEEVEEEEEEGEKYPTLSGPKSVKMQTKKFKPRGMANGRDGTLKRETVK…
Ovis aries	Placental	XP_011959942.2	MMPTLESKEKCGKGPKNTFAPPAQKLHSLMPYNLNSSKEEIPEISSPQAEVRPSLLKAGLEKKKEKTTTENGPGSGQEIQGKAQDSKNTKKEKEKSTLTDAEFEEIVQIVLRKSFQECLETSCTQPTRCTQLDKEPGIASSNTSDNNNADGDRVVVPPILEISASQEDGIIPEIKISKPGQPDSASSEKKFNKLSLSKRKKEAHEKMEKDQSEHEHRQDDQHKKTIQDHSQNGDQQKGEGNGFGQCLVWVQCSSPHCEKWRRLRGNIDPSVLPDNWSCDQNTDLQYNRCDIPEETWTGHESDVAYASYIPGSIIWAKQYGYPWWPGMVEPDPDLGEYFLFASHLDSLPSKYHVTFFGETVSRAWIPVNMLKNFQELTLELSGVRKCKNKDCSQKLGVAL…
Pan paniscus	Placental	XP_008963688.1	MMTTLQNKEECGKGPKRIFAPPAQKSYSLLPCSPNSPKEETPGISSPETEARISLPKASLKKKEEKATMKNVPSREQEKKRKAQINKQAEKKEKEKSSLTNAEFEEIVQTVLQKSLQECLGMGSGLDFAETSCAQPVVSTQSDKEPGITASATDTDNANGEEVPHTQEISVSWEGEAAPEIRTSKLGQPDPAPSKKKSNRLTLSKRKKEAQDEKVEKTQGGHEHRQEDQLKETVQDHSQIRDQQKGEISGFGQCLVWVQCSFPNCGKWRRLCGNIDPSVLPDNWSCDQNTADVQYNRCDIPEETWTGLESDVAYASYIPGSIIWAKQYGYPWWPGMIESDPDLGEYFLFTSHLDSLPSKYHVTFFGETVSRAWIPVNMLKNFQELSLELSVMKKRRNDC…
Pan troglodytes	Placental	XP_016801636.1	MMTTLQNKEECGKGPKRIFEPPAQKSYSLLPCSPNSPKEETPGISSPETEARISLPKASLKKKEEKATMKNVPSREQEKKRKAQINKQAEKKEKEKSSLTNAEFEEIVQTVLQKSLQECLGMGSGLDFAETSCAQPVVSTQSDKEPGITASATDTDNANGEEVPHTQEISVSWEGEAAPEIRTSKLGQPDPAPSKKKSNRLTLSKRKKEAQDEKVEKTQGGHEHRQEDQLKETVQDHSQIRDQQKGEISGFGQCLVWVQCSFPNCGKWRRLCGNIDPSVLPDNWSCDQNTADVQYNRCDIPEETWTGLESDVAYASYIPGSIIWAKQYGYPWWPGMIESDPDLGEYFLFTSHLDSLPSKYHVTFFGETVSRAWIPVNMLKNFQELSLELSVMKKRRNDC…
Panthera pardus	Placental	XP_019278273.1	MMAMLQSKEEHGKGSKKTFAPPVQKMHSLMCYSPNSPKEETLGISSSKDRLEKKEEKATTENGPSSGQEKKGKAQDKQAEKKEKEKLSLTNAEFEEIVQIVLRKSLQECLETSCAQPIRRAQLDKEPGIASSTDNDNADGEKVMVPHILEISATKEAGVTSVIETPKPGQPDPPPSEKKFNRFSLSKGKKGAQDEKMEKAQSGREPRQKAQLKKTVQNHSQIRNQQKGEVSGFGQCLVWVQCSSPNCEKWRRLCGNIDPSVLPDNWSCDQNTDLKYNRCDIPEESWIGHESDVAYASYIPGSIIWAKQYGYPWWPGMVESDPDLGEYFLFASHLDSLPSKYHVTFFGETVSRAWIPVNMLKNFQELSLELAGVEKLCWEKVPCLTKCARVRLFMRDSSF…
Panthera tigris	Placental	XP_007074008.1	MMATLQSKEEHGKGSKKTFAPPVQKIHSLMCYSPNSPKEETLGISSSKDRLEKKEEKATTENGPSSGQEKKGKAQDKQAEKKEKEKLSLTNAEFEEIVQIVLRKSLQECLETSCAQPIRRAQLDKEPGIASSTDNDNADGEKIMVPHILEISATKEAGVTSVIETPKPGQPDPPPSEKKFNRFSLSKGKKGAQDEKMEKAQSGREPRQKAQLKKTVQNHSQIRNQQKGEVSGFGQCLVWVQCSSPNCEKWRRLCGNIDPSVLPDNWSCDQNTDLKYNRCDIPEESWIGHESDVAYASYIPGSIIWAKQYGYPWWPGMVESDPDLGEYFLFASHLDSLPSKYHVTFFGETVSRAWIPVNMLKNFQELSLELAGVEKLCWEKVPCLTKCARKKCRNKDCSQ…
Papio anubis	Placental	XP_017812089.3	MFHKFHVITFLSECGKGPKRIFAPPAQKSYILLPCSPNSPKEETLGISSPETEASISLPKASLKKEEEKATTKNGPSRGQEKKRKAQNNKQAEKKEKEKSSLTPAEFEEIVQIVLQKSLQECLGMGSGLDFAETSCAQPIVSNQSAKEPGITASATDTDNANGEEVPHTQEISVSWEGEAAPEIRTSKLGQPDPVPSKKKSNRLTLSRRKKEAQDEKVEKTQGGHEHRQEDQLKETVQDHSQIRDLQKGEISGFGQCLVWVQCSFPNCGKWRRLCGNIDPSVLPDNWSCDQNTADVQYNRCDIPEETWTGLESDVAYASYIPGSIIWAKQYGYPWWPGMIESDPDLGEYFLFTSHLDSLPSKYHVTFFGETVSRAWIPVNMLKNFQELSLELSGMKKRR…
Paramormyrops kingsleyae	Bony fish	XP_023653430.1	MEINSGTKEKLVPGKWKNQGKKEAKKTADKDEKERGRYGCLMLPVQKENYSEGKERELDKGKHMTITAKGFKSIKNIKQNKKENEPNGERKVITDGKVCNGGVKRKQKTASEEDFKEGCRKTNAMGTDRGGLLLQRGKAGKKQEEKCKMRSHQGLEESGKKEKVGAERIGGKKEGCRHVGAQLCASGKSAGGKGQSQANPRKDNDRSRKVPCFTKQILPDAQLHDRFQGFLDSSLEHCLEDAQMVLNEVEGLQAKVESSHDRSKESKKEKLPRERKEATVQKPEAKKEYKDRLEEHTEDQCEHDDRWVQCSISRCKKWRKLDKHVDLSVLPPKWTCVQSSEPDCYNCNCPEETWSGSQDDVVHSSLVPGSLVWAQLQGYPWWPAMTESDPDSKSIFFFN…
Pelodiscus sinensis	Turtle	XP_006114723.1	MKKTFAPPLAKSHVLSLREGPEHHAKKEDMREKEVIIYPLSQGTDDSTETKLKADNSDTDVKRWKKSKVRKEEEDVQKRAKRNSSKASTKEMCHLTDLHFEEIVQRALQKSLQECMEESKRTFHQAEVSEVAEQQGLKKETLETSLPAENLVLGSDDPKGRVFAVDLKESMAKPKKCNKLPLNKKRKEMSDESTEANKERRKCHRKGEPKKIVQGYTLITDQEETEEGGGSAFNQCVAWVQCSYPSCEKWRRLSSDVDPSVLPEDWTCSQNTDLQYKSCDAPEEMWSGSENDVVYATYVPGSIIWAKQFGYPWWPGMVECDPDIGEYFLFSSRLDSLPSKYHVTFFGNSVSRAWISATKLRNFHELSTYSLGLKKLRNKDYCQKLDSAVKMAKEAEQIS…
Peromyscus leucopus	Placental	XP_028718774.1	MMATLQNYEESEKGTKKTFAPPTQKPHIVKPQPKSWKEETLGTSSPEAEAKPSRPKASSKKREQKTATEHGPSGGQEKKQKTQDKLAEKKGKSLQEKPTLTNAEFEEIFQSVLQKSLQECLETSCAQPIIPTKSDREPGIAPSADNENADGEKVIVPDTPEIASSLEEEVSSETRTSKSGQPVTEPSKKKFNRLFSSKRKKKAEDEKIQDGHGCSLKDKQKTMIQDHSQIRGQQKEEGGGFGQCLIWVQCSSPKCEKWRQLRGGIDPSVLPDNWSCDQNPDLNYNRCDIPEETWTGCESDVAYASYVPGSIIWAKQYGYPWWPGMIESDPDLGEYFLFASHLDSLPSKYHVTYFGETVSRAWIPVSMLKNFQELSLELARVKKCKNKDYGQKLEAAIRM…
Peromyscus maniculatus	Placental	XP_015856876.1	MMATLQNYEESEKGTKKTFAPPTQKPHIVKPQPKSWKEETLGTSSPEAEAKPSRPKASSKKREQKTATEHGPSGGQEKKQKAQDKPAEKKGKSLQEKPTLTNAEFEEIFQSVLQKSLQECLGMAWCEEKRLPSVRQSGRYPRETSCAQPIIPTKSDREPGIAPSADNENADGEKVIVPDTPEIASSLEEEVSSETRTSKSGQPVTEPSKKKFNRLFSSKRKKKAEDEKIQDGHECSLKAKQKTMIQDHSQIRGQQKEEEGGFGQCLIWVQCSSPKCEKWRQLRGGIDPSVLPDNWSCDQNPDLNYNRCDIPEETWTGCESDVAYASYVPGSIIWAKQYGYPWWPGMIESDPDLGEYFLFASHLDSLPSKYHVTYFGETVSRAWIPVSMLKNFQELSLEL…
Phascolarctos cinereus	Marsupial	XP_020834782.1	MMATLKNKEGGNGQKKAFTPPGQKACTMMPSSLDAPENEETQEMGLPEENARQDQLKDKIQKKKKEKVTRKSSGSDKEGKGPLATKTSKEQDTKGNERKTEKETPSLTNEQFEEIVQCVLKKSLQECLDVTCETSHAQRIEYSPGAKETSTTTTDVDRKLPGISHSTDIPVSTEDKIVPGTQSSTSDPLPSEKKQNKLSLSKKRKEAKDEKPELTKSDYKHRRKGQPRKIVQGYTQISDQEEAGGEWTSNFSQCVAWVQCSFPKCEKWRRLHGNIDPSVLPDDWSCSQNTDLQFNHCDIPEETWSGGESDVVYASYIPGSIIWAKQYGYPWWPGMVESDPDLGEYFLFASQQDVLPSKYHVTFFGDTASRAWIPSSMLKNFQELSLEQIEPKKIKNRDC…
Phoca vitulina	Placental	XP_032287000.1	MMTTLQSKEECGKGPKKTFAPPAQKLHSLMCYSPNPPKEETLGISSPKARSEKKEEKATTENGPSGGQENKGKPQDKQAVKKEKERASLTNAEFEEIVQIVLRKSLQECLETSRAQPVRCTQLNKEPGIASSTDNDNADGERVMAPHILEISATEEAGVTSVIKTSKPGQPDPAPSEKKFNSPSLSKGKKGAHEKMEKAQSGHEQRQKDQLKKPVQDDSQTRNQQKGEGGGFGQCLVWVQCSSPNCEKWRRLCGNIDPSVLPDNWSCDQNTDLRYNRCDIPEESWTGRESDVAYASYIPGSIIWAKQYGYPWWPGMVESDPDLGEYFLFASHLDSLPSKYHVTFFGETVSRAWIPVNMLKNFQELSLELAGVKKCRNKDCNQKLGAALMMAQEAEQISI…
Phyllostomus discolor	Placental	XP_028361828.1	MMTTLHSKDECGKGPKKPFAPPAQKLHSLMPYSPNSPKGKTLGISSQEAEARPNLLKARLEKEEKATTENGASSGQEERVKAQDNKQAEKKEKEKSSLTDEEFEEIVQTVLQKSLQQCMETSYVQPIRCTQLDKETGNASSTTDNGNANRERVMVPHILEISASQEDGIIPKTKTSKPGQPDPTTSEKKFGKLSLSKRKKKAQDENMKKAQSGYEHRQKDQPKKMVQDHSQIRDQQKREESGFGQCLVWVQCSSPNCEKWRQLRGNIDPSVLPDTWSCDQNTDLEYNRCDIPEETWVGPESEVAYASYIPGSIIWAKQYGYPWWPGMVECDPDLGEYFLFASHLDSLPSKYHVTFFGETVSRAWIPVNMLKNFQELSLELTGVKKCRNKDYCQKLRVAM…
Piliocolobus tephrosceles	Placental	XP_023052996.1	MMTTLQNKEECGKGPKRIFAPPAQKSYSLLPCSPNSPKEETLGISSPETEASISLPKASLKKEEEKATTKNGPSRGQEKKRKAQNNKQAEKKEKEKSSLTPAEFEEIVQIVLQKSLQECLGMGSGLDFAETSCAQPIVSTQSAKEPGITASATDTDNANGEEVPHTQEISVSWEGEAAPEIRTSKLGQPDPVPSKKKSNRLTLSKRKKEAQDEKVEKTQGGHEHRQEDQLKETVQAHSQIRDLQKGEISGFGQCLVWVQCSFPNCGKWRRLCGNIDPSVLPDNWSCDQNTADVQYNRCDIPEETWTGLESDVAYASYIPGSIIWAKQYGYPWWPGVIECDPDLGEYFLFTSHLDSMPSKYHVTFFGETVSRAWIPVNMLKNFQEMSLELSGMKKRRNDC…
Pogona vitticeps	Squamata	XP_020655405.1	MPQRTFAPPVAKPNHAPFAKGKLEAPQSRQEDGVATKPIKIPPKKSNQKQEMNTSSTATPLKCRKDGVMGKERENYLTDAQYDEIFRSVLQKPLQECMEISGMKGVSVEANKEQILGRETLTASPTSKDDVYGKISKENSERMPLEAKKKEHPLGMKKYGKCFQHNNKGKEKNEKPEADNGGCKENRKGAPKKKVKGNTQVVIDQEEMQEEEKSDRGSGSCWCIAWVQCSSPTCKKWRQLPSDIDPSVLPEDWSCSQNTDLQCNSCSVPEETWSGSENEVVYAVYIPGSIVWAKQYGYPWWPGLIEADPDIEEYFLFSSQMDLLPSKYHVTFFGSSVTRAWISASSLRNFSEANVKENGLAKLKNKADKRDLETALKMAKEAEQISIQERIRRFGFFSR…
Pongo abelii	Placental	XP_024105647.1	MMTTLQNKEECGKGPKRIFAPPAQKSYSLLPCSPNSPKEETLGISFPETEARISLPKASLKKKEEKATMKNVPSREQEKKRKAQINKQAEKKEKEKSSLTNAEFEEIVQIVLQKSLQECLGMGSGLDFAETSCAQRIVSTQSDKEPGITASATDTDNANGEEVPHTQEISMSWESEAAPEIRTSKLGQPDPAPSKKKSNRLTLSKRKNEAQDEKVEKTQGGHEHRQEDQLKKTVQDHSQIRDQQKGEISGFGQCLVWVQCSLPNCGKWRRLCGNIDPSVLPDNWSCDQNTDVQYNRCDIPEETWTGLESDVAYASYIPGSIIWAKQYGYPWWPGMIESDPDLGEYFLFTSHLDSLPSKYHVTFFGETVSRAWIPVNMLKNFQELSLELSVMKKCRNDCS…
Propithecus coquereli	Placental	XP_012494337.1	MMTTLQNKEECGKGPKKIFAPPAQKLHSLIPCSPNSPKEETLGISFPETETRPHLPKARLEKKEEKATIENGLSSGQKKKGKAQDNKQVEKKAKEKSSISNAEFEEIVQIVLRKSLQECLGMGSGLDFSETSCAQPIVCTQSDKEPAITTSATDSDNADREKVMVSHTPEISASQDNDVVSEISTSKSGQPDPAPSGKKFNRLPLSKRKKEAQDEKMEKVQGGHEHRQKDQLKKMVQGHSQIRNQQKGKQSGFGQCLIWVQCSSPNCEKWRRLRGNIDPSVLPDNWSCDQNTDLEYNSCDIPEETWTGHESDIAYASYIPGSIIWAKQYGYPWWPGMVESDPDLGEYFLFASHLDSLPSKYHVTFFGETVSRAWIPVNMLKNFQELSLELAGVKKCRNK…
Protobothrops mucrosquamatus	Squamata	XP_029139402.1	MTSQSKKNECNKLPKRVFAPPVVKSYSPPVGKGEMELHGKPEDGVTAKSIINMLPVQSKRLKERTANVEKKSQCKKNLEMIENEKGCLTDAQFEEIVQSVLQKSPQECMDEKAAANNVGCKANRKREPKKAAQGGNAQDVIDPEEAPEEEEEEEEEEAAGGSGSGQEVRRPTDGSSEAEKPGHEGGCCTAWVQCSYPSCEKWRRLSSDVDPSALPEDWSCSQNPDLQYNSCSVPEEDWSGSENEVVYAIYFPGSIVWAKQYGYPWWPGIIEADPDMEEYFLFSSQADSLPSKYHVTFFGHSVTRAWISASQLKNYGEAPGEGSALAKIRNKSEKKDLRVALEMAKEAERISIQERIRRFGFHGRFRNKASPREDKILKEQNSSASRPPVKRAPETKGGN…
Pteropus alecto	Placental	XP_024907314.1	MMTALQSKEEYGKGSKKSFAPPAQKLHSLIPDSLNSPKEETLGISSLETEARPNLLKARLKKKEKATTENGSSNGQEKKIKAQDNKQKEKKEKEKSSLTNAEFEEIIQIVLQKSLQQSLGMESSLGFPETSCAQPIRYTQFDKEPGITSSTTDNDNADGERVMVPHILEISASQEGGVIPEIKMSKPGQPDPAPSEKKFNRLSLSKRKKEAHEKMKKAQSEHKHRQKDQPKKMVQDHSQFTDQQKREESGFGQCLVWVQCSFPNCEKWRRLRGNIDPSVLPDNWSCDQNTDLEYNCCDIPEETWTGRESDVAYASYIPGSIIWAKQYGYPWWPGMVESDPDLGEYFLFASHLDSLPSKYHVTFFGETVSRAWIPVNMLKNFQELSLELARVKCRNKDCS…
Pteropus vampyrus	Placental	XP_023393300.1	MMTALQSKEEYGKGSKKSFAPPAQKLHSLIPDSLNSPKEETLGISSLETEARPNLLKARLKKKEKATTENGSSNGQEKKVKAQDNKQKEKKEKEKSSLTNAEFEEIIQIVLQKSLQQSLGMESSLGFPETSCAQPIRYTQFDKEPGITSSTTDNDNTDGERVMVPHILEISASQEGGVIPEIKMSKPGQPDPAPSEKKFNRLSLSKRKKEAHEKMKKAQSEHKHRQKDQPKKMVQDHSQFMDQQKREESGFGQCLVWVQCSFPNCEKWRRLRGNIDPSVLPDNWSCDQNTDLEYNCCDIPEETWTGRESDVAYASYIPGSIIWAKQYGYPWWPGMVESDPDLGEYFLFASHLDSLPSKYHVTFFGETVSRAWIPVNMLKNFQELSLELARVKCRNKDCS…
Puma concolor	Placental	XP_025779173.1	MMATLQSKEEHGKGSKKTFAPPVQKMHSLMCYSPNSPKEETLGISSSKDRLEKKEEKATTENGPSSGQEKKGKAKDKQAEKKAKEKLSLTNAEFEEIVQIVLRKSLQECLETSCAQPIRRTQLDKEPGIASSTDNDNADGEKVMVPHILEISATKEAGVTSVIETPKPGQPDPPPSEKKFNRFSLSKGKKGAQDEKMEKAQSGREPRQKAQLKKTVQNHSQIRNQQKGEGSGFGQCLVWVQCSSPNCEKWRRLCGNIDPSVLPDNWSCDQNTDLKYNRCDIPEESWIGHESDVAYASYIPGSIIWAKQYGYPWWPGMVESDPDLGEYFLFASHLDSLPSKYHVTFFGETVSRAWIPVNMLKNFQELSLELAGVEKLCWEKVPCLTKCARVRLFMRDSSF…
Python bivittatus	Squamata	XP_025030175.1	MSNAEKKSQGKKNLEMIKNEKGSLTDAQFEEIVQSVLQKSLQECMEKFEKRVVSAESTEEQHSRRETLEAFLAAEGKDLGKKTEVMLSEVEQKEHQLKMKKQSKCCVNKGEENINEKAEANNVGCKENRKGEPKKIAQGNAQDVIDQKEMQEEEEKADGGSGNSSWCTAWVQCSYPNCEKWRQLSSDVDPSVLPDDWSCSQNPDLRYNSCSVPEETWSGSENEVVYAIYFPGSIVWAKQYGYPWWPGIIEADPDFEEYFLFSSQADSLPSKYHVTFFGNSVTRAWISASLLKNFGEPPGEGNALAKLRSKGEKKNLRVALEMAKEAEQISIQERIRRFGFHSRFRNKESPKDYKTLKDCNNVTSRPWAKRTQETRGGNEKAATSSKNEEKLLQEISVLE…
Rattus norvegicus	Placental	XP_008767381.1	MAALQSHREYEKGTKKTFAPPTQKSHIEKPRPNSWKEDTPGTSSLEAETKPSLLKASLKKKQKATTEHGPSRGQEKKQKAHDQPAEKKGKEKTLTSAEFEEIFQIVLQKSLQECLETSCIQRIRPTKSDKEPGIAPSATDKENADPEKVITPDTPDIASSVEEGVNSEMGTSSLCQPGTEPSKKKWDRRSLSKQKKKAEDEKMEKIQDERECTLKEKQKIMIRDQKEEEGSFGHCVIWVQCSSPKCEKWRQLRGDIDPSVLPDDWSCDQNPDLNYNRCDIPEESWTGCESDVAYASYVPGSIVWAKQYGYPWWPGMIECDPDLGEYFLFASHLDSLPVTISHAPYYLVKKSFSYLKVSVLASFKGIFIIRSNPLFXKKCKNKDSTQKLEAAISMAHRAE…
Rhinatrema bivittatum	Amphibians	XP_029436419.1	MATLKNKEECRKVTKKKFISPGSKPLTSPSTDSPSKSRGKWGAARPLGGKDILKASQKAEEQEPGAKLEEEEEEEKMPGMTQKQRETEKLEGTTQNTDNKENIKRAELGRRKKESRKTEKEKCYITDLQYQELFQCVLQKSLEECLEDCKKIRHQAGPVHSNEEEAKKRVCSKLPLVGIEAVSKKLSLGYASAAEAATVIAPKLQQEEHCLVGQKTSKLSLSKKRNKKTDEGSKVECKRSRKGQPKKIVPGYTQITDQEEADECLNQCIAWVQCSLENCQKWRRLETSLDPSSLPENWSCSENLDVKYNSCDVPEETWSGSEPDVIYATFIPGSIVWAKQYGYPWWPGMVESDPDIGDYFLFTSQLDQLPSKYHITFLGDCVSRAWIPTSMLKNFNEMS…
Rhinopithecus bieti	Placental	XP_017741519.1	MMTTLQNKEECGKGPKRIFAPPAQKSYSLLPCSPNSPKEETLGISSPETEASISLPKASLKKEEEKATTKNGPSRGQEKKRKAQNNKQAEKKEKEKSSLTPAEFEEIVQIVLQKSLQECLGMGSGLDFAETSCAQPIVSTQSAKEPGITASATDTDNANGEEVPHTQEISVYWEGEAAPEIRMSKLGQPDPVPSKKKSNRLTLSKMKKEAHEKVEKTQGGHEHRQEDQLKETVQAHSQIRDLQKGEISGFGQCLVWVQCSFPNCGKWRRLCGNIDPSVLPDNWSCDQNTDVQYNRCDIPEETWRGLESDVAYASYIPGSIIWAKQYGYPWWPGMIESDPDLGEYFLFTSHLDSLPSKYHVTFFGETVSRAWIPVNMLKNFQELSLELSGMKKRRNDCSQ…
Rhinopithecus roxellana	Placental	XP_030788499.1	MFHKFHMITFLSECGKGPKRIFAPPAQKSYSLLPCSPNSPKEETLGISSPETEASISLPKPSLKKEEEKATTKNGPSRGQEKKRKAQNNKQAEKKEKEKSSLTPAEFEEIVQIVLQKSLQECLGMGSGLDFAETSCAQPIVSTQSAKEPGITASATDTDNANGEEVPHTQEISVSWEGEAAPEIRMSKLGQPDPVPSKKKSNRLTLSKMKKEAHEKVEKTQGGHEHRQEDQLKETVQAHSQIRDLQKGEISGFGQCLVWVQCSFPNCGKWRRLCGNIDPSVLPDNWSCDQNTADVQYNRCDIPEETWRGLESDVAYASYIPGSIIWAKQYGYPWWPGMIESDPDLGEYFLFTSHLDSLPSKYHVTFFGETVSRAWIPVNMLKNFQELSLELSGMKKRRN…
Rousettus aegyptiacus	Placental	XP_015980285.1	MASQWACLAVSVLDGMFHKFHLMIKFLSEYGKGSKKTFAPPAQKLHSLIPYSLNSPKEETPGISSLETEARPNLLKARLKKKEKATTENGSSSGQEKKVKAQDNKQMEKKEKEKSSLTNAEFEEIIQIVLQKSLQQSLGMESSLDFPETSCAQPIRYTQFDKEPEITSSTTDNDNIDGERVMVPHILEISASQEGGVIPEIKMSKPGQPDPAPSGKKFNRLSLSKRKKEAHKKMKKAQSEHKRRQKDQPKKMVQDYSQLVFMDQQKREESGFGQCLVWVQCSFPNCEKWRRLRGNIDPSVLPDNWSCDQNTDLEYNCCDIPEETWTGRESDVAYASYIPGSIIWAKQYGYPWWPGMVESDPDLGEYFLFASHLDSLPSKYHVTFFGETASRAWIPVNML…
Saimiri boliviensis	Placental	XP_003934238.1	MMTTLQNKECGKGPKRIFAPPAQKSYNLIPFSPNSPKKETLGISSPKTEARISLPKARLKKEEKATTNNASSRGQEKKRKAQNNKQAEKKEKEKSSLTNAEFEEIVQIVLQKSLQECLGMGSGLDFAETSCAQPIVSTHSDKEPGITASATDTDNADGEEVPHTQEISVSWEGEAVPEIRTSKLGQPDPAPSEKKSSRLSLSKRKKEAGHEKVEKTQSGHELRQKDQLKKTVQDHSQIRDQQKGEISGFDQCLVWVQCSFPNCGKWRRLCGNVDPSVLPDNWSCDQNTDMEYNRCDIPEETWTGLESDVAYASYVPGSIIWAKQYGYPWWPGMIESDPDLGEYFLFTSHLDSLPSKYHVTFFGETVSRAWIPVNMLKNFQELSLEPSGMKKHRNKDCSQ…
Sapajus apella	Placental	XP_032111103.1	MDRLSGFPPLPLSLQEKSSLTNAEFEEIVQIVLQKSLQERLGTGSGLDFAETSCAQPIVSTQSDKEPGITASATDTDNADGEEVPHTQEISVSWEGEAVPEIRTSKLGQPDPVPSEKISSRLSLSKRKKEAGDEKVEKTQSGHELRQKDQLEKTVQDHSQIRDQQKGEISGFDQCLVWVQCSFPNCGKWRRLCGNVDPSVLPDNWSCDQNTADMEYNRCDIPEETWTGLESDVAYASYVPGSIIWAKQYGYPWWPGMIESDPDLGEYFLFTSHLDSLPSKYHVTFFGETVSRAWIPVNMLKNFQELSLEPSGMKKHRNKDCSQKLGVALMMAEEAKQISIQERVNLFGFWSRFNGSNSNGERKDLQLSGFNSPGSCLDKKEEKEEELEKEGKQMDPTLP…
Sarcophilus harrisii	Marsupial	XP_031821146.1	MSHTKIFPHEDEKTELAKRARKHRRKGQPRKIVQGYTQISDQEEAGGEKTSNFSQCIAWVQCSFPSCAKWRRLLGNTDPSVLPDDWSCSQNTDLQFNHCDIPEENWSGCETDVVYASYIPGSIIWAKQYGYPWWPGMVESDPDLGEYFLFASQQDVLPSKYHVTFFGDTASRAWIPSNMLKNFRELSLEQVEPVRSSQELRKRIRNKDCSQKLMAALVMAQDAQRISIQDRLSLFGFHIRYKEDAAESGSSEEGRDLFFQEAKKPHRAGNSNSYISKEENKESCSTKCNLGCTSKKKLKLKGVGDMTDEQDETPKRKKNKFPSQDSTSVEEKGSSGNSHPDQSGLNKKFTAPQRKTTVTKLPGNRGKSAFQNQFPPTPSQALPLVEAGKKSDPQWSLIL…
Suricata suricatta	Placental	XP_029801598.1	MMAMSQSKEEHGKGSKKAFAPPAQKMHSLMCYSPNSPKEESLGVSSLKARLEKKEKKATTENGPSSGQRKKGKAQDKQTEKKEKEKLSLTNTEFEEIVQIVLQKSLQECLEASCAQPVRRTQLEKEPGIASSTDNDNADGEKVMVPHILEISATKETGVTSVIKTSKPGQADPAPSENKFNRFSLSKRKKRAHEKMEKAQSGCDPRQKAQLKKTVQNHSQIRNQQKGEGSGFGQCLVWVQCSSPNCEKWRRLCGNIDPSVLPDNWSCDQNTDLKYNRCDIPEESWTGRESDVAYASYIPGSIIWAKQYGYPWWPGMVESDPDLGEYFLFASHLDSLPSKYHVTFFGETVSRAWIPVNMLKNFQELTLELSGVKKCRNKDCNQKLGAALMMAQEAEQISI…
Sus scrofa	Placental	XP_013850885.1	MMTTLQNKEGCGKGAKKTFAPPAQKFRSLMPYSLNSAKEEILEISPPGAEAPPSLQKAGLEKKEKVTTEDGPDSGQEIKGKAQDNKKAEKKEKEKSSLTNAEFEEIVQIVLQKSLQECLGMESSLDFAETSSAQPTRCTQLDKEPGITSTTDNENADGERVVVPHNLEISASQEDGIIPEIKTSKPGQPDPAPSEKKFSRLSLSKREKKAHLKMEKTQSGYEHRQKDQLKKVVQDHSQFRDQQKGEGSGFDQCLVWVQCSSPNCEKWRRLRGNIDPSVLPDNWSCDQNTDAEYNRCDIPEETWTGHESDVAYASYIPGSIIWAKQYGYPWWPGMVESDPDLGEYFLFASHLDSLPSKYHVTFFGETVSRAWIPVNMLKNFQELSPELAGVKKCRNKDCS…
Terrapene carolina	Turtle	XP_029768922.1	MCHLTDLQFEEIVQSVLQKSLQECMEQSKRTFHQAEATEAAEPQGLKKETFETSLPAGNLVQHSDEPKGTASAVDLKEPLPKAKKRNKLSLNKMRKEMPDGSTEANKERHKRHRKGEPKKIVQGYTLIADQAETEEGGESTFNQCVAWVQCSYPSCEKWRRLSSDTDPSVLPEDWTCSQNTDLQYKSCDVPEEMWSGSENEVVYATYVPGSIIWAKQFGYPWWPAMVECDPDIGEYFLFSSRLDSLPSKYHVTFFGESVSRAWISATMLRNFHVFSTESLGLKMLRSKDSRQKLDAAVRMAKEAERISIQERVMRFGFISRSGEGGLLEAHEDSEELFNVASEEKQPCDGNENMVATSDFKEKTFLKGLRWSLFFAGLKKKFTIPGSNSSGSSQPKPPA…
Thamnophis elegans	Squamata	XP_032093132.1	MRTISSDLLPRGRNLLIATSLTGGRPAPIPAKGGFLPGVEQLPGTSISFRIMADPFPDPLLALGCCTAWVQCSYPSCEKWRRLSSDVDPSALPEDWSCSQNPDLQYNSCSVPEETWSGAEDEVVYAVYFPGTIVWAKQYGYPWWPGIIEADPDIGEYFLFSSQADSLPSKYHVTFFGHSVTRAWISASLLKNYGEPPAEGNAGAKLRSRSEKQNLKAALEMAKEAEEISIQERIRRFGFHSRFKHKESPKGGNILKEQNNAASRPPVQGTPGTKAGNKNTTTSGKDPGKLLREISGVKPNANIKTTIGVTKGDKTLESEGLENASPALKKSRPERTAPKAAATLRGSERAAGKQEGSQKGSKRPFARPPCQPPQARHPLRPSGPGSRPADFARSPPPPS…
Thamnophis sirtalis	Squamata	XP_013929882.1	MRTISSDLLPRGRNLLIATSLTGGRPAPIPAKGGFLPRVEQLPGTSISFRIMADPFPDPLLALGCCTAWVQCSYPSCEKWRRLSSDVDPSALPEDWSCSQNPDLQYNSCSVPEETWSGAEDEVVYAVYFPGTIVWAKQYGYPWWPGIIEADPDIGEYFLFSSQADSLPSKYHVTFFGHSVTRAWISASLLKNYGEPPAEGNAGAKLRSRSEKQNLKAALEMAKEAEEISIQERIRRFGFHSRFKHKESPKGGNILKEQNNVASRPPVKGTPGTKAGNKNTTTSGKDPGKLLREISGVKPNASIKTTIGVTKGDKTFESGGLENASPALKKSRPERTAPKAAATLRGSERAAGKQEGSQKGSKRPFALPPCQPPQARHPLRPSGPGSRPADFARSPPPPS…
Theropithecus gelada	Placental	XP_025235389.1	MMTTLQNKEECGKGPKRIFAPPAQKSYSLLPCSPNSPKEETLGISSPETEASISLPKASLKKEEEKATTKNGPSRGQEKKRKAQNNKQAEKKEKEKSSLTPAEFEEIVQIVLQKSLQECLGMGSGLDFAETSCAQPIVSNQSAKEPGITASATDTDNANGEEVPHTQEISVSWEGEAAPEIRTSKLGQPDPVPSKKKSNRLTLSKRKKDAQDEKVEKTQGGHEHRQEDQLKETVQDHSQIRDLQKGEISGFGQCLVWVQCSFPNCGKWRRLCGNIDPSVLPDNWSCDQNTDVQYNRCDIPEETWTGLESDVAYASYIPGSIIWAKQYGYPWWPGMIESDPDLGEYFLFTSHLDSLPSKYHVTFFGETVSRAWIPVNMLKNFQELSLELSGMKKRRNDCS…
Trichechus manatus	Placental	XP_023596857.1	MTTLQNKEECRKGPKKSFAPPAQKLHRLMPSSRNSLKEDTLRINSPELEAKPSLPKARLEKKNEKATTENGQGSGQEKKGKDLYNKQAEKKAEKEGASLTNAEFEEIVQIVLRKSLQECLGVGSGLGLAEMSCAQPIACTQSDKEPELTSMTVDNDNADGLIVPHTPEISASQENEVVPEINASKPGQPDPASSEKKFNKLSLNKRKMEAQNEKLEKLQGKHEHRQKDQPKKTARNHSQIRDQQKGEGGGFGQCLVWVQCSSPNCEKWRRLHGNIDPSVLPENWSCDQNTDLEYNRCDIPEETWTGHESDVAYASYIPGSIIWAKQYGYPWWPGMVESDPDLGEYFLFASHLDSLPSKYHVTFFGETVSRAWIPVNMLKNFQELSLELAGAKKCRNKDC…
Tupaia chinensis	Placental	XP_014446074.1	MMTTLQNKECGKGSKKTFAPPAQKKHSLVLCSPNAAKEETLGISFPGTEGRLEKKDKATTENGPSNDQEKKGKTEDNKQAQKKEKEKSSLTNAEFEEIVQIVLQKSLQECLGMGSSLDFVETSYAQPVTHTPSDKQPGITSATDKDNADEERIMVHNSPEILVSQEDKVVSEIKTSKPGQPDPTAVVKKFNRLSLSKRNKEAQNEKMEKAQGGHEHKQKDQSKKMVHSHSQIRHQQKGKKSGFGLYQVWVQCSFPNCEKWRRLPGNIDPSVLPNNWSCDQNTDLEYNHCDIPEETWIGHESDVAYASYVPGSIIWAKQYGYPWWPGIIESDPDLGEYFLFASHLDSLPSKYHVTFFGETVSRAWIPVTMLKNFQELSLELARVKKYRNKECCHKLGAAL…
Tursiops truncatus	Placental	XP_019786147.1	MMTTLQSKECGKGPKKTFAPPAQKLHSLMPYNLNSSKEEILGISSPEAETRPSLLKARLEKKKEKTTKENGTSSGQEIKGKAQDSKKAEKKEKGKSTLTNAEFEEIVQIVLQKSLQECLGMESSLDFAETSCAQPTRCTQLDKEPGIASSTTDNNSADGERVVVPHILEISASQEGGVIPEIKTSKPGQPDPAPSEKKFNKLSLSKRKKAAQNEKMEKAQSGHEHRQKDQLKKTVQDHSQIRDQQKGEGSGFGQCLVWVQCSSPNCEKWRRLRGNIDPSVLPDNWSCDQNTDLEYNHCDIPEETWTGHENEVAYASYIPGSIIWAKQYGYPWWPGMVESDPDLGEYFLFASHLDSLPSKYHVTFFGETVSRAWIPVNMLKNFQELSLELAAVKKCKNKD…
Urocitellus parryii	Placental	XP_026268939.1	MMTTLQKKEECGKGSKKPFAPPTQKLHSMIPNGPNSHRDETLGISSPVAEAKASPPKARLEKEEKATTEDGPGVGQEKKGKAQDKPAEKKEKGKSSLTNAEFEEIVQIVLQKSLQECLGSACGMGSGLNFAETTCVQTNSQSDKEPGIASATDNDNAVGERKMIPHTPETSASVEDVPEIRTSKSAQLVPAPSEKKFNRLSLSKRKREAQDEKMDKVQGGHECREKDHPEKIIQGDSQIRGQQKGEESGFGQCLVWVQCSSPNCEKWRRLRGNIDPSILPDNWSCDQNTDLDYNRCDIPEEIWTGRESDVAYASYVPGSIIWAKQYGYPWWPGMVESDPDLGEYFLFASHLDSLPSKYHVTFFGETVSRAWIPVNMLKNFQELSLELAGVKKCRNKDYS…
Ursus arctos	Placental	XP_026371926.1	MPSQRAVQTLSVLDSGFRKFHLVIKFLSECGKGPKKTFAPPAQKLHSLMCYSPDPPKEETLGISSPKARLEKKEEKATTENGPSSGQENKGKPQDKQAEKKEKEISSLTNAEFEEIVQIVLRKSLQECLEMGSSLDFAETSCAQPIRCTQLDKDPGIASSTDNGNADGVMVPHILEISATQEAGVTSVIKTSKPGQPDPAPSEKKFNRSSLSKGKKGSHEKMEKARSGHEQKQKDQLKKPVQDDSQTRNQEKGEGGGFGQCLVWVQCSSPDCEKWRRLCGNIDPSVLPANWSCDQNTDSRYNRCDIPEESWTGLESDVAYASYIPGSIIWAKQYGYPWWPGMVESDPDLGEYFLFASHLDSLPSKYHVTFFGETVSRAWIPVNMLKNFQELSLELAGGK…
Ursus maritimus	Placental	XP_008696640.1	MMTTLQSKEECGKGPKKTFAPPAQKLHSLMCYSPDPPKEETLGISSPKARLEKKEEKATTENGPSSGQENKGKPQDKQAEKKEKEISSLTNAEFEEIVQIVLRKSLQECLEMGSSLDFAETSCAQPVRCTQLDKDPGIASSTDNGNADGVMVPHILEISATQEAGVTSVIKTSKPGQPDPAPSEKKFNRSSLSKGKKGSQDEKMEKAPSGHEQKQKDQLKKPVQDDSQTRNQEKGEGGGFGQCLVWVQCSSPDCEKWRRLCGNIDPSVLPANWSCDQNTDSRYNRCDIPEESWTGLESDVAYASYIPGSIIWAKQYGYPWWPGMVESDPDLGEYFLFASHLDSLPSKYHVTFFGETVSRAWIPVNMLKNFQELSLELAGGKKFRNKDCNQKLGAALTMA…
Vicugna pacos	Placental	XP_006219217.1	MMTTLQSKEECGKGPKKTFAPPAQKLHSLMPCSLNSSKEEILGISSPEARPSLLQARLEKKEEKATTENGPGGGQEIKRKAQNNKKAEKKEKEKSSLTDAEFEEIVQIVLRKSLQECLETSCAQPTRCTQLDKEPGISSSVTDNDSADGERVVVPHILEISASKEGGVIPEIKTSKPGHPDPASSEKKFGRFSLSKRKKEAQYEKMEEAQSGHEHRQKDQLKKIVQGHSQIRDQQKREGSGFGQCLVWVQCSSPNCEKWRRLRGNIDPSVLPDNWSCDQNTDLEYNRCDIPEETWIGRESDVAYASYIPGSIIWAKQYGYPWWPGMVESDPDLGEYFLFASHLDSLPSKYHVTFFGETVSRAWIPVNMLKNFQELSLELAGLKKCRNKDCSQKLGAALM…
Vombatus ursinus	Marsupial	XP_027699977.1	MMTTLKNKEGGKGPKKAFTPPGQKTCTVIPCSLDAPDNEETQGIGLLGVNTSQDQPKDKTQKKKKEKVTRKSSGNDKEGKGPLATKTGKEQDTKGNERKTEKETTNLTSEQFEEIVQCVLKKSLQDCLDMTCETSCAQRIEYSPGTKETSTATTEVDRKLLGIPYSPAIPVSKEEKIVAGTQSPKSDPLPSEKKQNKLSLSKKRIEAKDEKPELTKSGHKHRRKGQPKKIVQGYTQISDQEEAGGERTSNFSQCIAWAQCSFPKCEKWRRLHGNIDPSVLPDDWSCSQNTDLQFNHCDIPEETWSGGESDVVYASYIPGSIIWAKQYGYPWWPGMVESDPDLGEYFLFASQQDVLPSKYHVTFFGDTASRAWIPSNMLKNFQELSLEQIEPKKIKNKDC…
Vulpes vulpes	Placental	XP_025875274.1	MMAMLQSKEECGKGPKKTCTPSAQKLYSMMCYSPNSSKEESLGVSSPKTRLKKKEEKTTTENGSSSGQENKGKPQDKQAEKEKEKSSLTNAEFEEIVQIVLRKSLQECLETSCAQPIRCTLLDKEPGIAASTDNDNADGKKNIILRERVMVPHILEISATQEAGVTSVIKTSKPSQPDPAPSEKKSNRPFLSKGEKGAQDEKMEKTQSGHEHRQKDQLKKTVQVDSQIRNQQRGKGGGFGQCLVWVQCSSPNCEKWRRLCGNIDPSVLPDDWSCDQNTDLKYNHCDIPEESWTGRESDVAYASYIPGSIIWAKQYGYPWWPGMVESDPDLGEYFLFASHLDSLPSKYHVTFFGETVSRAWIPVNMLKNFQELSLELAGVKKCRNKDCNQKLGAALMMAQ…
Xenopus tropicalis	Amphibians	XP_031755491.1	MSSLGGKSVTGQLGANSGCRASGMYPQRAKRRLRPEPLQPNHSPLARMAPHHRVKEEPNEPRIRGKIPKLQTSEGTLSSRDYEEIFGAVLGNPGRAPPQVTGGITDAGDVDPALRVTPWKHKRNPTAPQAEPPGSAPIESAKASPVGPWQRGVCVAWVQCAEPNCKKWRRLGQDVDPLLLPEDWCCEQNMESQYRSCAEPEEPCSGDVDLIYAAFIPGCLVWAKQSGYPWWPAMIDSDPDSAYFFKFKHCTDPLPWKYHVTFLGDAVSRAWICSSHLKPFRDHSPESLKVYKEKNQELKKMLVKSIGMANAVLSLGIQERLHSFGFCRRSGLNV
Zalophus californianus	Placental	XP_027468282.1	MMTTLQSKEEYGKWPKKTFAPPAQKLHSLMCYSPNSPKEETLGISSPKARSEKKEEKATTGNGPSSGLENKGKPQDKQAEKKEKERASLTNAEFEEIVQIVLQKSLQECLETSCAQPIRCTQLDKERGISSTDNDDADGERVMVPHILEISATEEAGVTSVRKTSKPGQPDPAPSQKKFSRPSLIKGKKRAQNEKMEKAQSGHEQRQKNQLKKTVQDDSQTRNQQKGEDGGFSQCLVWVQCSSPNCEKWRRLRGNIDPSVLPDNWSCDQNTDSRYNRCDIPEESWTGRESDVAYASYIPGSIIWAKQYGYPWWPGMVESDPDLGEYFLFASHLDSLPSKYHVTFFGETVSRAWIPVNMLKNFQELSLELAGVKKCRNKDCNQKLGAALTMAQEAEQISI…

## Sheet: Ensembl Orthologs
ZCWPW1 orthologs retrieved from Ensembl database. All orthologs were screened by PrositeScan or NCBI conserved domain (CD) for presence of both zf-CW and PWWP domains. Any ortholog that lacks either one of the two domains in both PrositeScan and NCBI CD was excluded. For each species with multiple orthologs isoforms, the longer isoform is reported in this table.
Species	Clade	Accession	Sequence
Ailuropoda melanoleuca	Placental	ENSAMEG00000015049	MMTTLQSKEECGKGPKKTFAPPAQKLHSPMGYSPDPPKEETLGISSPKARLEKKEEKATTENGPRSGQEKKGKPQDKQAEKKEKEISSITNAEFEEIVQIVLQKSLQECLETSCAQPIRCTQLDKDPGIASSTDNGNADGERVMVPHILEMSATQEAGVTSVIKTSKPGQPDPAPSEKKSNRRSLSKGKKGSQDEKMEKARSGHEQKQTDQLKKPVQDDSQTRNQEKGEGGGFGQCLVWVQCSSPDCEKWRRLCGNIDPSVLPDNWSCDQNTDSRYNRCDIPEESWTGRESDVAYASYIPGSIIWAKQYGYPWWPGMVESDPDLGEYFLFASHLDSLPSKYHVTFFGETVSRAWIPVNMLKDFQELSLELAGGKKFRNKDCNQKLGAALTMAQEAERIS…
Anolis carolinensis	Squamata	ENSACAG00000011611	MQEEEEEEEEEAGRGGSGSSELNPPSCSSWCIAWIQCSDPNCHKWRRLSSKTDPSVLPEDWSCSQNLDLQYNSCSISEESWSGTEGEIVYAAYVPGSLVWAKQYGYAWWPGVIEADPYLGEYLLFSSQTDSLPSKYHVTFFGKTVSRAWISASMLRNFAGSSMEKGNGLDKPKSQTGKKNLKVALRMAKEAEQMNIQERIRMFGFHRRFSG
Aotus nancymaae	Placental	ENSANAG00000030162	MMTTLQNKEECGKGPKRIFAPPAQKSYNLIPFSPNSPKEETLGISPPETEARISLPKARLKKEEKATTNNASSRGQEKKRKAQNNKQAEKKEKEKSSLTNAEFEEIVQIVLQKSLQERLGMGSGLDFSETSCAQPIVSTQSDKEPGITASATDTDNADGEEVPQAQEISVSWEGVAVPEIRTPKLGQPDPAPSEKKSSRLSLSKRKTEADEKVEKTQSGHELRQKDQLKKTVQDHFQIRDQQKGERSGFDQCLVWVQCSFPNCGKWRRLCGNVDPSVLPDNWSCDQNTDMEYNRCDIPEETWTGLESDVAYASYVPGSIIWAKQYGYPWWPGMIESDPDLGEYFLFTSHLDSLPSKYHVTFFGETVSRAWIPVNMLKNFQELSLEPSGMKKCRNKDCSQ…
Astyanax mexicanus	Bony fish	ENSAMXG00000019882	MDEKHGNKEKSAIVSPISQANNTESNKTKVEVKTAMTNGQSEEKKKGKGSKPGETDERTGYEQLKPSQAEKEPRKRVHEQEMNGAVVGTKRGKVEMNGREDEETTKEKTENENDQVVQRSAEEIDDETQQTTASNFELLEAMLDYSLSGLIEDTKAMLTEVESMQSCIQQKAHRDEQERGSCSTTLDKESKKEMKGRSVCEKEEVNSESDEYVVWVQCSKANCGKWRKLDEDVDPSMLPDDWICENNPDPAFCSCSAPEEQSSMCEEKIFFSNLVPGSLVWVQQNGHFWWPAMVQRDPETDDYLEFHRKTDLDPCKCHVTYFGDPVCIGWVLCSNVRNYADLSENDVLSMLEFQELKEKLKDAICMSKQALDLSPQMRLVKFGFWTRYDSEEDSDVREV…
Bison bison	Placental	ENSBBBG00000000347	MESSLDFSETSCTQPTRCTQLDKEPGIASSNTSDNNNADGDRVVVPPILEISASQEDGIIPEIKISKPGQPDSASSEKKFNKLSLSKRKKEAQDEKMEKDQSGHEHRQDDQHKKTIQDHSQNRDQQKGEGSGFGQCLVWVQCSSPNCEKWRRLRGNIDPSVLPDNWSCDQNTDLQYNRCDIPEETWTGHESDVAYASYIPGSIIWAKQYGYPWWPGMVEPDPDLGEYFLFASHLDSLPSKYHVTFFGETVSRAWIPVNMLKNFQELTLELSGVRKCKNKDCSQKLLVALMMAQKAEQISIQERVNLFGFWSRYSGPDNDGEEKDLALSGTSSLDSCLEKEEKEPELEEDGEEERDKADPTLLNPKPAKIQTKKPKTRDPKKKFKAPQSKAPVSSLSEEK…
Bos grunniens	Placental	ENSBGRG00000016860	MMPTLESKEKCGKGPKNTFAPPAQKLHSLMSYNLNSSKEEILEISSPQAEVRPSLLKAGLEKKKKKKTTTENGPGNGQEIQGKAQDSKNAKKEKEKSTLTNAEFEEIVQIVLQKSFQECLETSCTQPTRCTQLDKEPGIASSNTSDNNADRDRVVVPPILEISASQEDGIIPEIKISKPGQPDSASSEKKFNKLSLSKRKKEAQDEKMEKDQSGHEHRQDDQHKKTIQDHSQNRDQQKGEGSGFGQCLVWVQCSSPNCEKWRRLRGNIDPSVLPDNWSCDQNTDLQYNRCDIPEETWTGHESDVAYASYIPGSIIWAKQYGYPWWPGMVEPDPDLGEYFLFASHLDSLPSKYHVTFFGETVSRAWIPVNMLKNFQELTLELSGVRKCKNKDCSQKLLVA…
Bos indicus	Placental	ENSBIXG00005012940	MFHKLHLMTKFLSECGKGPKNTFAPPAQKLHSLMSYNLNSSKEEILEISSPQAEVRPSLLKAGLEKKKKKKTTTENGPGNGQEIQGKAQDSKNAKKEKEKSTLTNAEFEEIVQIVLQKSFQECLETSCTQPTRCTQLDKEPGIASSNTSDNNNADGDRVVVPPILEISASQEDGIIPEIKISKPGQPDSASSEKKFNKLSLSKRKKEAQDEKMEKDQSGHEHRQDDQHKKTIQDHSQNRDQQKGEGSGFGQCLVWVQCSSPNCEKWRRLRGNIDPSVLPDNWSCDQNTDLQYNRCDIPEETWTGHESDVAYASYIPGSIIWAKQYGYPWWPGMVEPDPDLGEYFLFASHLDSLPSKYHVTFFGETVSRAWIPVNMLKNFQELTLELSGVRKCKNKDCSQ…
Bos mutus	Placental	ENSBMUG00000024025	MESSLDFSETSCTQPTRCTQLDKEPGIASSNTSDNNADRDRVVVPPILEISASQEDGIIPEIKISKPGQPDSASSEKKFNKLSLSKRKKEAQDEKMEKDQSGHEHRQDDQHKKTIQDHSQNRDQQKGEGSGFGQCLVWVQCSSPNCEKWRRLRGNIDPSVLPDNWSCDQNTDLQYNRCDIPEETWTGHESDVAYASYIPGSIIWAKQYGYPWWPGMVEPDPDLGEYFLFASHLDSLPSKYHVTFFGETVSRAWIPVNMLKNFQELTLELSGVRKCKNKDCSQKLLVALMMAQKAEQISIQERVNLFGFWSRYSGPDNDGEEKDLALSGTSSLDSCLEKEEKEPELEEDGEEERDKADPTLLNPKPAKIQTKKPKTRDPKKKFKAPQSKAPVSSLSEEKE…
Bos taurus	Placental	ENSBIXG00000029808	MMPTLESKEKCGKGPKNTFAPPAQKLHSLMSYNLNSSKEEILEISSPQAEVRPSLLKAGLEKKKKKKKTTTENGPGNGQEIQGKAQDSKNAKKEKEKSTLTNAEFEEIVQIVLQKSFQECLETSCTQPTRCTQLDKEPGIASSNTSDNNNADGDRVVVPPILEISASQEDGIIPEIKISKPGQPDSASSEKKFNKLSLSKRKKEAQDEKMEKDQSGHEHRQDDQHKKTIQDHSQNRDQQKGEGSGFGQCLVWVQCSSPNCEKWRRLRGNIDPSVLPDNWSCDQNTDLQYNRCDIPEETWTGHESDVAYASYIPGSIIWAKQYGYPWWPGMVEPDPDLGEYFLFASHLDSLPSKYHVTFFGETVSRAWIPVNMLKNFQELTLELSGVRKCKNKDCSQKLL…
Callithrix jacchus	Placental	ENSCJAG00000015363	MMTTLQNKEECGKGPKRIFAPPAQKSYNLIPFSPNSPKEETLGISSPETEARISLPKPRLKKEEKATTNNASSRGQEKKRKAQNNKQAEKKEKEKSSLTNAEFEEIVQIVLQKSLQEHLGMGSGLDFAETSCAQPIVSTQSDKEPGITASATDTDNADGEEVPHTQEISVSWEGEGVPEIRTSKLGQSDPAPSEKKSSRLSLSKRKKEADEKVEKTQSEHELRQKDQLKKTVQDHSQIRDQQKGERSGFDQCLVWVQCSFPNCGKWRRLCGNVDPSVLPDNWSCDQNTDKEYNRCDIPEETWTGLESDVAYASYVPGSIIWAKQYGYPWWPGMIESDPDLGEYFLFTSHLDSLPSKYHVTFFGETVSRAWIPVNMLKNFQELSLEPSGMKKHRNKDCSQ…
Camelus dromedarius	Placental	ENSCDRG00005016923	MESSLDFAETSCAQPTRCTQLDKEPGISSVTDNDSADGERVVVPHILEISASKEGGVIPEIKTSKPGHPDPASSEKKFGRFSLSKRKKEAQYEKMEEAQSGHEHRQKDQLKKIVQGHSQIRDQQKREGSGFGQCLVWVQCSSPNCEKWRRLRGNIDPSVLPDNWSCDQNTDLEYNRCDIPEETWIGRESDVAYASYIPGSIIWAKQYGYPWWPGMVESDPDLGEYFLFASHLDSLPSKYHVTFFGETVSRAWIPVNMLKNFQELSLELAGLKKCRNKDCSQKLGAALMMAQEAEQISIQERVNLFGFWSRYSGSDDSGGGKDLMLSAANSSDSCLEKEEEESELEEEEEEEEQEKKDPTLPSPKPAKIQTKKPKARGPKKKFKAPQSRASVSHSSEGKE…
Canis lupus	Placental	ENSCAFG00030019825	MMAMLQSKEECGKGPKKTCTPSAQKLYSMMCYSPNSSKEESLGVSSPKARLKKKEEKTTTENGSSSGQENKGKPQDKQAEKEKEKSSLTNAEFEEIIQIVLRKSLQECLEMGSSLDFAETSCAQPIRCTLLDKEPGIAASTDNDNADGERVMVPHILEISATQEAGVTSVIKTSKPGQPDPAPSEKKSNRPFLSKGKKGAHEKMEKTQSGHEHRQKDQLKKTVQVDSQIRNQQRGKGGDFGQCLVWVQCSSPNCEKWRRLCGNIDPSVLPDDWSCDQNTDLKYNHCDIPEESWTGRESDVAYASYIPGSIIWAKQYGYPWWPGMVESDPDLGEYFLFASHLDSLPSKYHVTFFGETVSRAWIPVNMLKNFQELSLELAGVKKCRNKDCNQKLGAALMMA…
Capra hircus	Placental	ENSCHIG00000024057	MMPTLESKEKCGKGPKNTFAPPAQKLHSLMPYNLNSSKEEIPEISSPQAEVRPSLLKAGLEKKKEKTTTENGPGSGQEVQGKAQDSKNTKKEKEKSTLTDAEFEEIVQIVLRKSFQECLETSCTQPTRCTQLDKEPGIASSNTSDNNNADGDRVVVPPILEISASQEDGIIPEIKISKPGQPDSASSEKKFNKLSLSKRKKEPQDEKMEKDQSEHEYRQDDQHKKTIQDHSQDGDQQKGEGNGFFAVTGQCLVWVQCSSPHCEKWRRLRGNIDPSVLPDNWSCDQNTDLQYNRCDIPEETWTGHESDVAYASYIPGSIIWAKQYGYPWWPGMVEPDPDLGEYFLFASHLDSLPSKYHVTFFGETVSRAWIPVNMLKNFQELTLELSGVRKCKNKDCSQK…
Carlito syrichta	Placental	ENSTSYG00000009605	TMTTLQNKEECGKEPKKIFAPPAQKLSSLIPCSLNSCDKTMGISSPETEAKASLPKARLEKRKEKAAAENGLSSGQEEEGKAQDNQQAEKKEKEKSSLTSAEFEEIVQIVLQKSLQECLGMGFGLDFTETSIAQPIICTQSDKEPGIISSASYNANGVMVPQIPKISASWEDEVVPELRTSKIGQPDPARSKKKFSRLSLSKRKKDAHEKMEKVQGGHEQRQKDRLKKMIQDHSQIKDHQKGEESGFGQCLIWVQCSSPNCEKWRQLRGNIDPSILPDNWSCDQNTDLEYNRCDIPEETWTGLESDVAYASYIPGSIIWAKQYGYPWWPGMVESDPDLGEYFLFTSHLDSLPSKYHVTFFGETVSRAWIPVNMLKNFQELSLELAGVKKCRNKDCSQKL…
Castor canadensis	Placental	ENSCCNG00000018319	MMTTLQNKEECGKGPKKTFAPPIQKLHSMIRHAPDSPKEVTPGVNSPQAETRPNLPKARIEQKVTRENGPSSGQETKGKAQDNKPAGKKVKEKSSLTNAEFEEIVQIVLQKSLQECLEVSCAQCIVCTQLNKQRGIASSATKNMDGERVMVSHAPETSAAVEDEVVPEIRTSKPSQPIPAPSEKKLTKLPLSKRKKRAQDEKIGKIQGGHEHRQKDQLKQMIQNHFYIRDQKKGEESGFGQFLVWVQCSFSNCEKWRRLPGNIDPSVLPDNWSCDQNPDLNYNRCDIPEEAWTGRESDVIYASYIPGSIIWAKQYGYPMEVGSSKYHVTFFGETVSRAWIPVNMLKNFQELSQELAGVKKCRNKDYSQKLGAAIVMAQEAEKVNIQERVNLFGFWSRYS…
Catagonus wagneri	Placental	ENSCWAG00000013132	MMTTLQNKEECGKGPKKTFAPPAQKFRSAMPCILNSAKEEILDLSTPRAEASPSQLKARLEKKKEKVTTENGPGSGQAIRGKTQDNKKAEKKEKEKSSLTNAEFEEIVQIVLQKSLQECLGMESSLDFAETSYAQPARCTQLDKELGITSTTVNENADGERVVVPHDLEISASQEDGVIPEIKTSKPGQPDPAPSEKKCNRLSLSKKEKKAHQKMEKTQSGYEHRRKDQVKKMVQDHSQIRGQQKGEGSGFGQCLVWVQCSSPNCEKWRRLRGNIDPSVLPDNWSCDQNTDAEYNRCDIPEETWTGHESDVAYASYIPGSIIWAKQYGYPWWPGMVESDPDLGEYFLFASHLDSLPSKYHVTFFGETVSRAWIPVNMLKNFQELSLELAGVKKCRNKDC…
Cebus capucinus	Placental	ENSCCAG00000037503	MMTTLQNKEECGKGPKRIFAPPAQKSYNLIPFSPNSPKKETLGISSPETEARISLPKARLKKEEKATTNNASSRGQEKKRKAQNNKQAEKKEKEKSSLTNAEFEEIVQIVLQKSLQERLGTGSGLDFAETSCAQPIVSTQSDEEPGITASATDTDNADGEEVPHTQEISVSWEGEAVPEIRTSKLGQSDPAPSEKKSSRLSLSKRKKEADEKVEKTQSGHELRQKDQLEKTVQDHSQIRDQQKGEISGFDQCLVWVQCSFPNCGKWRRLCGNVDPSVLPDNWSCDQNTDMEYNRCDIPEETWTGLESDVAYASYVPGSIIWAKQYGYPWWPGMIESDPDLGEYFLFTSHLDSLPSKYHVTFFGETVSRAWIPVNMLKNFQELSLEPSGMERVNLFGFWS…
Cercocebus atys	Placental	ENSCATG00000040902	MMTTLQNKEECGKGPKRIFAPPAQKSYSLLPCSPNSPKEETLGISSPETEASISLPKASLKKEEEKATTKNGPSRGQEKKRKAQNNKQAEKKEKEKSSLTPAEFEEIVQIVLQKSLQECLGMGSGLDFAETSCAQPIVSNQSAKEPGITASATDTDNANGEEVPHTQEISVSWEGEAAPEIRTSKLGQPDPVPSKKKSNRLTLSKRKKEAHEKVEKTQGGHEHRQEDQLKETVQDHSQIRDLQKGEISGFGQCLVWVQCSFPNCGKWRRLCGNIDPSVLPDNWSCDQNTDVQYNRCDIPEETWTGLESDVAYASYIPGSIIWAKQYGYPWWPGMIESDPDLGEYFLFTSHLDSLPSKYHVTFFGETVSRAWIPVNMLKNFQELSLELSGMKKRRNDCSQ…
Chelonoidis abingdonii	Turtle	ENSCABG00000022607	INNNHELILANVCFRETSETSRPAGNLVPHSDEPKGTVSAVDLKDPLPKAKKRNKLSLNKMRKETRKSFVCAKTDMANDQGLAASSLCRALVVGLQLLCVCVGCAVDQCVAWVQCSYPSCEKWRRLSSDTDPSVLPEDWTCSQNTDLQYKSCDVPEETWSGSENEVVYATYVPGSIIWAKQFGYPWWPAMVECDPDIGEYFLFSSRLDSLPSKYHVTFFGQSVSRAWISATMLRNFHEFSTESLGLVNSGFPQGSVLGLVRFNTFVNDLEKGGPEGPGFTTPQQCFKVVPGPGGSRLWNWCIQMD
Chinchilla lanigera	Placental	ENSCLAG00000003676	MATLQKEECGKGPKKTFAPPTQKLHSMLPCPPDLPKEALGIGSPEAEAKPSQPKLEKKKAATEKGPSLGREKKRKAQDSKPGEKNGKEKIILTNAEFEEIVQTVLRKSLQECLGMGSGLDFAETSCVKPTVCIQSDKEPGIVASATDNDNANGEKVMVPHAPEISAFLQDAVTPEMRASEPGQAIAAPSEKKLRRLYLSKRKKEAQDEKMETPQHGHEHGQTNRREDVIQNRKRKSNGFSHCIVWVQCSSPNCRKWRRLCRNIDPSVLPDNWFCYQNTDVDYNCCDIPEEAWTGNESEVVYASYIPGSIIWAKQYGYPWWPGMVEADPDLEEYFLFASHFDSLPSKYHVTFFGETVSRAWIPANMLKNFQELSLEQTGVKKCRNKDYIQKLEVAVTMAY…
Chlorocebus sabaeus	Placental	ENSCSAG00000017892	MMTTLQNKEECGKGPKRIFAPPAQKSYSLLPCSPNSPKEETLGISSPETEASISLPKTSLKKEEEKAATKNGPSRGQEKKRKAQNNKQAEKKEKEKSSLTPAEFEEIVQIVLQKSLQECLGGMGSGLDFAETSCAQPIVSTQSAKEPGITASATDTDNANGEEVPHTQEISVSWEGEAAPKIRTSKLGQPDPVPSKKKSSRLTLSKRKKEAHEKVEKTQGGHEHRQEDQLKETVQDHSQIRDLQKGEISGFGQCLVWVQCSFPNCGKWRRLCGNIDPSVLPDNWSCDQNTADMQYNRCDIPEETWKGLESDVAYASYIPGSIIWAKQYGYPWWPGMIESDPDLGEYFLFTSHLDSLPSKYHVTFFGETVSRAWIPVNMLKNFQELSLELSGMKKRRNDC…
Chrysemys picta	Turtle	ENSCPBG00000016401	MPFVTHSALPVPLFLGDVSPHRLAVRGNCPECAAEVLARVHGETFETSRPAGNLVQHSDEPKGTASAVDIKEPLPKAKKRNKLSLNKMRKKLHESTEANKERHKRHRKGEPKKIVQGYTLIADQEETEEGGESTFNQCVAWVQCSYPSCEKWRRLSSDTDPSVLPEDWTCSQNTDLQYKSCDVPEEMWLGSENEVVYATYVPGSIIWAKQFGYPWWPAMVECDPDIGEYFLFSSRLDSLPSKYHVTFFGESVSRAWISAPMLRNFHAFSTESLGLKTLRSKDSRQKLDSAVRMAKEAERISIQERVMRFGFISRSGEGGLLEAHEDSEELFNVASEEKQPCDGNENMVATSDFKEKTFLKGLKKKFTVPGSNSSGSSQPKPPARGNRVNLTLSCRDSLK…
Clupea harengus	Bony fish	ENSCHAG00000014343	MQRSYKERKETGAKGGSCRKRRREEEEDDDSETDEYDSWVQCSRAECKKWRRLQDDTDPSTLPNNWTCRENTDSACNSCDVPEDSWSVSKEEEFYYCSLVPGSLVWAQQTGYPWWPAMIERDPGANDFLRFKTRRDPFPFKCHVTYLGNPVSRAWVQRCRIRDYNDLPEQAALNMVRQQAYKKRLKDAIKMAGQAQKLRLEKRLNRFGFMTRRSTDGQNLEEDSDIEEILGLFVESSGKGSGRRKKGKDSGDEEVKPPQKLRKQTEERVEEPKDVAKEVEIKSEKESTDETGKKENDEKKKEECELEKKSQTEKPRKGVVDQMTDNEGEKNVAGQEEEKKKKKKPGKEKGNTKKDLVKEKKGTEKKENQKKGGKKETKGEREHWWEYR
Colobus angolensis	Placental	ENSCANG00000030604	MMTTLQNKEECGKGPKRIFAPPAQKSYSLLPCSPNSPKEETLGISSPETEASISLPKASLKKEEEKATTKNGPSRGQEKKRKAQNNKQAEKKEKEKSSLTPAEFEEIVQIVLQKSLQECLGMGSGLDFAETSCAQPIVSTQSAKEPGITASATDTDNANGEEVPHTQEISVSWEGEAAPEIRTSKLGQPDPVPSKKKSNRLTLSKRKKEAHEKVEKTQGGHEHRQEDQLKETVQAHSQIRDLQKGEISGFGQCLVWVQCSFPNCGKWRRLCGNIDPSVLPDNWSCDQNTDVQYNRCDIPEETWTGLESDVAYASYIPGSIIWAKQYGYPWWPGVIECDPDLGEYFLFTSHLDSVPSKYHVTFFGETVSRAWIPVNMLKNFQEMSLELSGMKKRRNDCSQ…
Cricetulus griseus	Placental	ENSCGRG00015011036	MMATSQNIKEYEKGTKKTFASPTQKSHHVKPQADSWKEDPQGTSSLEAEAKPRRPRASPKKEQKTATEHGPNGGQEKKRKAQDKPAKKKGKEKQTLTNAEFEEIFQIVLRKSLQEYLETSCVQPIIPTKSDKEPGIASPATDNENADGINSREEVIVPDTREIASSLEEEVDSEIRTSKPGQLAAEPSKKKSNRLSLSKRRKKSEDEKMEEIQDGYECILKDKQKTTIQDPSQIRGQQKEEEGGFGQCLIWVQCSSSKCEKWRQLRGDIDPSVLPDNWSCDQNPDLNYNRCDIPEETWTGCESDVAYASYVPGSIVWAKQYGYPWWPGMIETDPDLGEYFLFSSHLDSLPSKYHVTYFGERVSRAWIPVSMLKNFQELSLELVRGKTCRNKDYNQKLEA…
Dasypus novemcinctus	Placental	ENSDNOG00000002593	VMTTLQNKEECGKGPKKTFAPPTQKLHSLMPFNPNSPKEETQGFSYPVAGARPSPPNARLEKKKEKVNTENGPGGSQEKKGMDQDNKQAEKKANKEKASLTNAEFEEIVQIVLRKSLQECLENSCTQPIGCIQSDREPGIASTTTSENSNADGERLMVPHTPEISAPQEDRVVLEINTSEPGLPDPAPTEKKVNRFSLNKRKKESQDEKMEKVQGRPEHKQKDQPKKTIQDHSQTSDKQKGESSGFGQCLVWVQCSSPNCEKWRRLRGNIDPSVLPDNWSCDQNTDLEYNRCDIPEETWTGRESDVAYASYIPGSIIWAKQYGYPWWPGMVESDPDLGEYFLFASHLDSLPSKYHVTFFGETVSRAWIPVNMLKNFQELSLELARAGKLCQEKVPCLIR…
Echinops telfairi	Placental	ENSETEG00000017950	RMTTLQNKEEHGKGPMKSFAPPAKKLRRLTLTNPNSLKEDTLGITSSEGETKPSMPKARFKKKEKPPTELGQGSGQKKKGKNPLNKQAEKEAEKERTSLTNEEYEEIFQIVLQKSREECLGVGSVLDFAETSCAQPIGGTQTDKELGIASNTANIDNLDGRRLIVPYTPENPTSQENGVVSEINANKPGQPHPVSSEKKCNKLCLNKRKKNAHGKLEISQGGHEHRQEDQPKNSGQDHAQITEQLEGDKGGFGQYLVWVQCSSPNCEKWRRLCRNMDPSILPSNWSCDQNTDLEYNRCDIPEETWTGHESDVAYASYIPGSIIWAKQYGYPWWPGMVEPDPDLGEYFLFASHLDCLPSKYHVTFFGEAVSRAWIPVNMLKNFQELSLDLAGAKKFRNKD…
Equus asinus	Placental	ENSEASG00005017081	MESSLDFTETSCAQSIRCTQLDKEPGIAVSTTDNDNADGEMVMVPHILEISASQEDGIIPEIKTSEPFQPDPAPSERKFNRLSLSKRKKEAQDGKVEKAQSGHEHRQKDQLKKAVQDYSQIRDPQKGEGSGFDQCLVWVQCSSPNCEKWRRLRGNIDPSVLPDNWSCDQNTDLEYNRCDIPEETWTGRESDVAYASYIPGSIIWAKQYGYPWWPGMIESDPDLGEYFLFASHLDSLPSKYHVTFFGETVSRAWIPVNMLKNFQELSLELTGVKKYRNKDCSQKLGAAVVMAQEAEQISIQVGEYSEHMSPPLWALAHLMLSGANSPDSCVEKEVEESELEEKEEEKKALRKNLKLLKLIAGPVLRWGKKGEPWAAEVEHVN
Equus caballus	Placental	ENSECAG00000022363	MMTTVQGKECGKGPKKTFAPPAQKLQSLMLCSSDSPKEETLGISSPEAEARPDLPKARSRKKEKKATTENGPSSGQGEKRKSQDNRQAEKKDKEKSSLTNAEFEEIIQIVLRKSLQECLGMGSSLDFTETSCAQSIRCTQLDKEPGIAVSTTDNDNADGEMVMVPHILEISASQEDGIIPEIKTSEPFQPDPAPSERKFNRLSLSKRKKEAQDGKMEKAQSGHEHRQKDQLKKAVQDYSQIRDPQKGEGSGFDQCLVWVQCSSPNCEKWRRLRGNIDPSVLPDNWSCDQNTDLEYNRCDIPEETWTGRESDVAYASYIPGSIIWAKQYGYPWWPGMIESDPDLGEYFLFASHLDSLPSKYHVTFFGETVSRAWIPVNMLKNFQELSLELTGVKKYRNKD…
Felis catus	Placental	ENSFCAG00000010802	MMATLQSKEEHGKGSKKTFAPPVQKMHSLMCYSPNSPKEETLGISSSKDRLEKKEQKATTENGPSSGQEKKGKAKDKQAEKKAKEKLSLTNAEFEEIVQIVLRKSLQECLETSCAQPIRRTQLDKEPGIASSTDNDNADGEKVMVPHTLEISATKEAGVTSVIETPKPGQPDPPPSEKKFNRFSLSKGKKGAQDEKMEKAQSGREPRQKAQLKKTVQNHSQIRNQQKGEGSGFGQCLVWVQCSSPNCEKWRRLCGNIDPSVLPDNWSCDQNTDLKYNRCDIPEESWIGHESDVAYASYIPGSIIWAKQYGYPWWPGMVESDPDLGEYFLFASHLDSLPSKYHVTFFGETVSRAWIPVNMLKNFQELSLELAGVEKLCWEKVPCLTKCARVRLFMRDSSF…
Fukomys damarensis	Placental	ENSFDAG00000016445	MMATLQKKEECGKGLKKTFAPPTQKLHSMIPCGPDLPMETLGISSPEAEVKPSLPKARLEKKKEEEEEEEEAATEHGPSLGQDKKRKARDNKPAEKNEKEKLILTNAEFEEIVQTVLRKSLKECLETSCVKPTMCIQSDKETEIAASATDDDIASGESVMVPQVPEISASLKDEVTPDKGASEPGLAILASSEKKHNRLYLNKRKKQAQDEKMETTQSGSEYRQTDQLNNMIQNRSQTQTRVQKKRKGSGFGHCIVWVQCSFPNCKKWRQLCRNTDPSVLPDNWFCHQNTDVNYNCCDIPEEAWTGPESEVVYACYVPGSIVWAKQYGYPWWPGMIESDPDLGEYFLFASHLHSVPSKYHVTFFGEAVSRAWIPVNMLKNFQELCLEQTGVKKCRNKEY…
Gopherus agassizii	Turtle	ENSGAGG00000016612	MKKTFAPPLAKSHVLSSRKGPEHHGKKEDARAKEVITHPLSQGMSYSSETKLKEDHPNTEVKQWKKSRVAKEEDTGHVKGPATPQDVEKRPKRNLTKASAKEMCHLTDLQFEEIVQSVLQKSLQECMEESKRPFHQAEATEAAEPQGLKKETFETSRPAGNLVPYSDEPKGTVSAVDLKDPLPKAKKRNKLSLNKMRKETHEGPEANKERRKRHRKGEPKKIVQGYTLITDQEETEEGGESAFNQCVAWVQCSYPSCEKWRRLSSDTDPSVLPKDWTCSQNTDPQYKSCDVPEETWSGSENEVVYATYVPGSIIWAKQFGYPWWPAMVECDPDIGEYFLFSSRLDSLPSKYHVTFFGQSISRAWISATMLRNFHEFSTESLGLKTLRSKDYRQKLDSAV…
Gorilla gorilla	Placental	ENSGGOG00000005363	MMTTLQNKEECGKGPKRIFAPPAQKSYSLLPCSPNSPKEETPGISSPETEARISLPKASLKKKEEKATMKNVPSREQEKKRKAQINKQAEKKEKEKSSLTNAEFEEIVQIVLQKSLQECLGMGSGLDFAETSCAQPVVSTQSDKEPGITASATDTDNANGEEVPHTQEISVSWEGEAAPEIRTSKLGQPDPAPSKKKSNRLTLNKRKKEAHEKVEKTQGGHEHRQEDQLKKTVQDHSQIRDQQKGEINGFGQCLVWVQCSFPNCGKWRRLCGNIDPSVLPDNWSCDQNTDVQYNRCDIPEETWTGLESDVAYASYIPGSIIWAKQYGYPWWPGMIESDPDLGEYFLFTSHLDSLPSKYHVTFFGETVSRAWIPVNMLKNFQELSLELSVMKKRRNDCSQ…
Heterocephalus glaber	Placental	ENSHGLG00000017181	MMATLQKKEECGKGPKKTFAPPTQKLHSMIPCSPDSPKETLEIGSPEAEVKPNQPKPRLGKREKKAAIENGPSLGRKKRKAQDNKSAEKNEKEKLILTNAEFEEIVQIVLRKSLKECLGMGSGLNFAETSCVNPTVCIHSDKEVGIAASAATDNDNASGERVMVPQVPEISASLEDEVTPEIRPSEPGQAILAPSEKKLNRLYLSKRKKEARPCIVWVQCSSPNCKKWRQLCKNMDPSVLPDNWFCHQNTDLNYNCCDIPEETWTGRESEVVYASYVPGSIVWAKQYGYPWWPGMIESDPDLGEYFLFASHLDSMPSKYHVTFFGKTVSRAWIPVNMLKNFQELFLEQTGVKKCRNKDYIQKLEVAIIMAHKAQQTGIQDRVNLFGFWSRYCGSDSNEE…
Homo sapiens	Placental	ENSG00000078487	MMTTLQNKEECGKGPKRIFAPPAQKSYSLLPCSPNSPKEETPGISSPETEARISLPKASLKKKEEKATMKNVPSREQEKKRKAQINKQAEKKEKEKSSLTNAEFEEIVQIVLQKSLQECLGMGSGLDFAETSCAQPVVSTQSDKEPGITASATDTDNANGEEVPHTQEISVSWEGEAAPEIRTSKLGQPDPAPSKKKSNRLTLSKRKKEAHEKVEKTQGGHEHRQEDRLKKTVQDHSQIRDQQKGEISGFGQCLVWVQCSFPNCGKWRRLCGNIDPSVLPDNWSCDQNTDVQYNRCDIPEETWTGLESDVAYASYIPGSIIWAKQYGYPWWPGMIESDPDLGEYFLFTSHLDSLPSKYHVTFFGETVSRAWIPVNMLKNFQELSLELSVMKKRRNDCSQ…
Ictidomys tridecemlineatus	Placental	ENSSTOG00000007532	MMTTLQKKEECGKGSKKPFAPPTQKLHSMIPHGPNSHRDETLGISSPVAEAKASPPKARLEKEEKATTEDGPGVGQEKKGKAQDKKVPPTLQTIFSYKEPGIASATDNDNAVGEWKMIPHTPETSASVEDVPEIRTSKSAQLVPAPSEKKFNRLSLSKRKREAQDEKMEKVQGGHECREKDHPEKIIQGDSQIRGQQKGEESGFGQCLVWVQCSSPNCEKWRRLRGNIDPSVLPDNWSCDQNTGGKNLDYNRCDIPEEIWTGRESDVAYASYVPGSIIWAKQYGYPWWPGMVESDPDLGEYFLFASHLDSLPSKYHVTFFGETVSRAWIPVNMLKNFQELSLELKKCRNKDYSQKLVAAIMMAQKAEQINIGERVNLFGFWSRYGGSDSSGNGKDLILS…
Latimeria chalumnae	Coelacanth	ENSLACG00000022422	MASRKATLGEESLSQNPAGTELTGLDSGLPQPSMDKVVNMQNAGVPVLAPRTTGTESEGKKINKLSLKKRKKEEKTTKVYKEEGRKHSRKGKPRKLNLSETGDQEDPSENETTISHGAAWVQCSRAQCGKWRRLRDSMDPSTLPEDWTCSQNADAEFRSCGAPEEAFSGSEDGIIYTELIPGSLVWARQYGYPWWPGMVEPDPNVGDYLLFTSQLHQMPAKYHITFLGDAVSRAWISASMVKSFQDFPPETTGLKKGKTRDYRNQINAAVKMAENAQKINVKERISLFGFASRYTADAESLLSQSSEDEVEEEEEEEEGDQSDTVLSGGSYQGGQIQSGKDEGGAALRSGPADKDLKRRKSKEKTESKSKSSSHSWKHKSQEPLGSRKSKSVAAQSSKP…
Lepisosteus oculatus	Bony fish	ENSLOCG00000013580	MDEGKEKLKMKKPKFAPPVALGGPGDGQGKGPQEERGAGVREREKAAGSRGRPGRKAGEESPGRGIGAGRSAGEESAEVLGEGPIPRTGKSRSAAAGGKRPEERSLRVPGLEGQARELLGPGRTGGERRRKGKAVGPGGGSGRGEGWEEKALRGEEEEGTARPGPAGIKESLAGCTGGKGWAGLQPGGKRAEAAEPSGRKKDRAGGQRGDRPLPGGTGSVLKEGAKEGDRPKSDKKKPKMKTGESDQEPEEKPRGLPVWRTTGEERAGTPKNSKDGASSVWEECCPSPFLSDSQYNAIFQAVLDKSLDKCLDDARTVLSEVELLQASIDEDSQRGQDKRPEYRDSDVRLAPGHKKRHAQQGNGQRRGELLHSQKKEQEEEEGGEDSDSSQEDWSSWVQC…
Loxodonta africana	Placental	ENSLAFG00000026355	KMTTLQNKEECGKEPRKTFAPPTQKLCRLMPSSPNSLKVDTLRISSPEVESNPSLPKARLEKKNEKATTENGQGSDQEKKGKDQYNKQPKKKAEKERGSLTNAEFEEIVQIVLRKSLQECLETACAQPIACTQSDKEPEIASVTVDNDNAEGERLIVPHTPEISASQENGVVREINASKPGQPDPPPSEKKFDKLSLNKRKKEARNEELEKFRGEHEHRQKDQPKKTVQNHSQIRDQQKREGGGFVTGQCLVWVQCSSPNCEKWRRLHRNIDPSALPDNWSCDQNTDLEYNSCDIPEETWTGHESDVAYASYIPGSIIWAKQYGYPWWPGMVESDPDLGEYFLFASHLDSLPSKYHVTFFGETVSRAWIPVNMLKNFQELSLELAGVKKCRNKDCRQKL…
Lynx canadensis	Placental	ENSLCNG00005020321	MMATLQSKEEHGKGSKKTFAPPVQKMHSLMCYSPNSPKEETLGISSSKDRLEKKEEKATTENGPSSGQEKKGKAKDKKAEKKAKEKLSLTNAEFEEIVQIVLRKSLQECLEMGSSLDFSETSCAQPIRRTQLDKEPGIASSTDNDNADGEKVMVPHILEISATKEAGVTSVIETSKPGQPDPPPSEKKFNRFSLSKGKKGAHEKMEKAQSGREPRQKAQLKKTVQNHSQIRNQQKGEGSGFGQCLVWVQCSSPNCEKWRRLCGNIDPSVLPDNWSCDQNTDLKYNRCDIPEESWIGHESDVAYASYIPGSIIWAKQYGYPWWPGMVESDPDLGEYFLFASHLDSLPSKYHVTFFGETVSRAWIPVNMLKNFQELSLELAGVKRCRNKDCSQKLGVALTM…
Macaca fascicularis	Placental	ENSMFAG00000044114	MMTTLQNKEECGKGPKRIFAPPAQKSYSLLPCSPNSPKEETLGISSPETEASISLPKASLKKEEEKATTKNGPSRGQEKKRKAQNNKQAEKKEKEKSSLTPAEFEEIVQIVLQKSLQECLGMGSGLDFAETSCAQPIVSNQSAKEPGITASATDTDNANGEEVPHTQEISVSWEGEAAPEIRTSKLGQPDPVPSKKKSNRLTLSKRKKEAQDEKVEKTQSGHEHRQEDQLKETVQDHSQITDLQKGEISGFGQCLVWVQCSFPNCGKWRRLCGNIDPSVLPDNWSCDQNTDVQYNRCDIPEETWTGLESDVAYASYIPGSIIWAKQYGYPWWPGMIESDPDLGEYFLFTSHLDSLPSKYHVTFFGETVSRAWIPVNMLKNFQELSLELSGMKKRRNDCS…
Macaca mulatta	Placental	ENSMMUG00000012720	MMTTLQNKEECGKGPKRIFAPPAQKSYSLLPCSPNSPKEETLGISSPETEASISLPKASLKKEEEKATTKNGPSRGQEKKRKAQNNKQAEKKEKEKSSLTPAEFEEIVQIVLQKSLQECLGMGSGLDFAETSCAQPIVSNQSAKEPGITASATDTDNANGEEVPHTQEISVSWEGEAAPDIRTSKLGQPDPVPSKKKSNRLTLSKRKKEAQDEKVEKTQSGHEHRQEDQLKETVQDHSQITDLQKGEISGFGQCLVWVQCSFPNCGKWRRLCGNIDPSVLPDNWSCDQNTDVQYNRCDIPEETWTGLESDVAYASYIPGSIIWAKQYGYPWWPGMIESDPDLGEYFLFTSHLDSLPSKYHVTFFGETVSRAWIPVNMLKNFQELSLELSGMKKRRNDCS…
Macaca nemestrina	Placental	ENSMNEG00000040539	MMTTLQNKEECGKGPKRIFAPPAQKSYSLLPCSPNSPKEETLGISSPETEASISLPKASLKKEEEKATTKNGPSRGQEKKRKTQNNKQAEKKEKEKSSLTPAEFEEIVQIVLQKSLQECLGMGSGLDFAETSCAQPIVSNQSAKEPGITASATDTDNANGEEVPHTQEISVSWEGEATPEIRTSKLGQPDPVPSKKKSNRLTLSKRKKEAHEKVEKTQSGHEHRQEDQLKETVQDHSQITDLQKGEISGFGQCLVWVQCSFPNCGKWRRLCGNIDPSVLPDNWSCDQNTDVQYNRCDIPEETWTGLESDVAYASYIPGSIIWAKQYGYPWWPGMIESDPDLGEYFLFTSHLDSLPSKYHVTFFGETVSRAWIPVNMLKNFQELSLELSGMKKRRNDCSQ…
Mandrillus leucophaeus	Placental	ENSMLEG00000028696	MMTTLQNKEECGKGPKRIFAPPAQKSYSLLPCSPNSPKEETLGISSPETEASISLPKASLKKEEEKATTKNGPSRGQEKKRKAQNNKQAEKKEKEKSSLTRAEFEEIVQIVLQKSLQECLGMGSGLDFAETSCAQPIVSNQSAKEPGITASATDTDNTNGEEVPHTQEISVSWEGEAAPEIRTSKLGQPDPVPSKKKSNRLTLSKRKKEAHEKVEKTQGGHEHRQEDQLKETVQDHSQIRDLQKGEISGFGQCLVWVQCSFPNCGKWRRLCGNIDPSVLPDNWSCDQNTDVQYNRCDIPEETWTGLESDVAYASYIPGSIIWAKQYGYPWWPGMIESDPDLGEYFLFTSHLDSLPSKYHVTFFGETVSRAWIPVNMLKNFQELSLELSGMKKRRNDCSQ…
Marmota marmota	Placental	ENSMMMG00000012393	MMTTLQKKEECGKGSKKPFAPPTQKLHSMIPHGPNSHRDETLGISSPVAEAKASPPKARLEKEEKATTEDGPGVGQEKKGKAQDKPAEKKEKGKSSLTNAEFEEIVQIVLQKSLQECLETSCRPTQSDKEPGIASATDNDNAVGERKMIPHTPETSASVEDVPEIRTSKSAQLVPAPSEKKFNRLSLSKRKREAQDEKMEKVQGGHECREKDQPEKMIQGDSQIRGQQKGEESGFGQCLVWVQCSSPNCEKWRRLRGNIDPSILPDNWSCDQNTDLDYNRCDIPEEIWTGRESDVAYASYVPGSIIWAKQYGYPWWPGMVESDPDLGEYFLFASHLDSLPSKYHVTFFGETVSRAWIPVNMLKNFQELSLELAGVKKCRNKDYSQKLVAAIMMAQKAEQ…
Meriones unguiculatus	Placental	ENSMUGG00000015368	VMAMVQGNGEHEKGTKKTFAPPTQKSHSVKPQPKPWKEDSPGARSPEVEAKPSQLSASLEKKEQKAATENGPGRGREKKRKAHDKPAEKRGKEKTTLTNAEFEEIFQTVLQKSLQECLETSCVQRTIPTKADKEPGIAPSTTDNENADGEKEIVPASSPEEEVNSEIRTSELGQPATKPSKKKCNRLCLSKRKKKAENEKMEKIQDGHECTLRDKQKTMIQDHSQIKGQQKEEEGGFGHCLIWVQCSFPKCEKWRQLRGNIDPSVLPDNWSCDQNPDLNYNRCDIPEETWTGRESDVAYASYVPGSIVWAKQYGYPWWPGMIESDPDLGEYFLFASHLDSLPSKYHVTFFGEAVSRAWIPVSMLKNFQELSLELARVKKGRNKDYNQKLEAAITMAHKA…
Mesocricetus auratus	Placental	ENSMAUG00000018839	MMATLRNNEEKQTLTDAEFEEIFQTVLRKSLQEYLETSCVQPIIPTKSDKEPGITSPATDNESADGEKVIVPDTPEIASSLEEDVNSEIRTSKPGQLAAEPSKKKINRLSLSKRKKKAEDEKMDEIQDECSLKDKQKTMIQGPSQIRDQQEEEEKEGGFGQCLIWVQCSSAKCEKWRQLRGDIDPSVLPDNWSCDQNPDLNYNRCDIPEETWTGCESDVAYASYVPGSIIWAKQYGYPWWPGMIETDPDLGEYFLFASHLDSLPSKYHVTYFGETVSRAWIPVSMLKNFQELSLELARGKKCRNKDYNQKLEAAIAMAHKAEQISIQERVSVFGFWSRYNGSDSSGEGKDLMLRESHSPESCLEKEKDSEEEKEETKDPTLPRPKAAKTQTKKIKSRGP…
Microcebus murinus	Placental	ENSMICG00000003360	MMTTLQNKEECGKRPKKIFAPPVQKLHSLILCSTNSPKEETLGISSPETETRPHLPKARLEKKEEKATTENGPSSGQKKKGKAQDNKQVEKKEKSSISNEEFEEIVQIVLRKSLQECLGMGSGFDFAETSCAQPIVCTQSDKEPAITASATDNDTADREKVMVPHTPEIPASQDNDVVSAISTSKLGQPDLAPSGKKFNRLPLSKRKKEAHEKMEKVQGGHEHRQKDQRKKMVQDHSHIRNQQKRKQSGFGQCLIWVQCSSPNCEKWRRLRGNIDPAVLPDNWSCDQNTDLEYNSCDIPEETWTGHESDIAYASYIPGSIIWAKQYGYPWWPGMVESDPDLGEYFLFYCPDSLPSKSGTFKVVWNKDCSQKLGAALIMAQEAEQISIQERVNLFGFRSR…
Microtus ochrogaster	Placental	ENSMOCG00000007800	MMAALQNDKEYEKGTKKNFAPPTQKSHSVKQLNSWKEDTLGTNSQEAEAKPSRPKASSKKERKKATEQGPGGGQENKPAEKKGKEKPTLTNAEFEEIFQIVLQKSLQEYLETSCVQPMTPTKSDKESGVAPSATENENADGEKVIVPGTPKMASSLEEEVNSEIKTSKPGQLVTEPSKKKFNRLCLNKRKKKAEDEKMETIQDGRECSLKDKQKTMSQDHSQIRGQKEEEGGFGQCLIWVQCSFPKCEKWRQLRGDIDPSVLPDNWSCDQNPDLNYNRCDIPEETWTGCESDVAYASYIPGSIIWAKQHGYPWWPGMIEPDPDLGEYFLFASHLDSLPSKYHVTYFGETVSRAWISVSMLKNFQELSLELSKVKKCRNKDYSQKLEAAITMAHEAEQIN…
Monodelphis domestica	Marsupial	ENSMODG00000046013	MGGYHRLLLSVNFLKNCISRKLLETPYPPITLASKEEGIVPGTQSSKSDILPSEKKQNTLPLSNKKKEENKEKTKLTQESCKHRRKGQSRKIVQGYTQISDQEESGGEWAGNFGIAWVQCSFPSCEKWRQLHGNINSSSILPDNWSCSQNTGGQLDPDLGEYFLFTSQQDVLPAKYHVTFFGNSVSRAWISSNMLKNFQELSLEQVERDQVSLFGFSSRCKENASEPDSSEEEGDIFFKETKKTQSTGSSNSGFSKEESKVRSQGFLIVQFWG
Moschus moschiferus	Placental	ENSMMSG00000012792	VMPTSESKEKCGKGPKKTFAPPAQKLRSLMPYNLNSSKEEILEISSLQAEVRPSLLKAKLEKKEEKTTTENGPGSGQEIKGKAQDSKKAKKEKEKSTLTNAEFEEIVQIVLRKSFQECLGESSLDFSETCCTQPIRCTQLDKEPGIASSNTSDNNSADGDRVVVPPILEISASQEDGIIPEIKIFKPGQPDSASSEKKFNELSLSKGKKEAHEKMEKDQSGHEQRQDDQQKKTIPDHSQNRGQQKGEGSGFGQCVVWVQCSSPNCEKWRRLCGNIDPSVLPDNWSCDQNTDLQYNRCDIPEETWTGHESDVAYASYIPGSIIWAKQYGYPWWPGMVEPDPDLGEYFLFASHLDSLPSKYHVTFFGETVSRAWIPVNMLKNFQELSLELSGVRKCKNKDY…
Mus caroli	Placental	MGP_CAROLIEiJ_G0027893	MMAALQTHKEYEKGTKKTFAPPTQKLHSKKPQPSSWKEDTPGTSSPEAETKPSLLKASLKKEQKATTEHGPNRGQEKKLKAQDQPAKKKGKEKTLTNAEFEEIFQIVLQKSLQECLETSSCVQHIRPTKLDEEPGIVPPATDKKNAEPEKVVTPDTPKIASSLEEEVNSEMGTSKLGQPVTEPSKKKFNRLSLSKQKEKAADEKMEKIQDGRECSLKEKQKIVIQDQSQIRGHQKEEESGFGHCVIWVQCSSPKCEKWRQLRGNIDPSVLPDDWSCDQNPDPNYNRCDIPEESWAGCESDVAYASYVPGSIIWAKQYGYPWWPGMIEADPDLGEYFLFASHLDSLPSKYHVTFFGETVSRAWIPARMLKNFQELSLELVKKCKNKNSNQKLEAAIAMAH…
Mus musculus	Placental	MGP_129S1SvImJ_G0030245	MMAALQTHKEYEKGTKKTFAPPTQKLHSEKPQPSSWKEDAPGTSSPEAETKPSLLKASLKKEQKPTTEHGPNRGQERKLKAQDQPAKKKGKERTLTSAEFEEIFQIVLQKSLQECLETSSCVQHIRPTKLDEEPGIVPPATDKKDADPEKVITPDTPKIASSLEEEVNSEMGTSKLGQPVTEPSKKKFNRLSLSKQKKKAEDEKMEKIQDGRECSLKEKQKIVIQDQSQIRGPQKEEESGFGHCVIWVQCSSPKCEKWRQLRGNIDPSVLPDDWSCDQNPDPNYNRCDIPEESWAGCESDVAYASYVPGSIIWAKQYGYPWWPGMIEADPDLGEYFLFASHLDSLPSKYHVTFFGETVSRAWIPVRMLKNFQELSLELVKKCKNKNSNQKLEAAIAMAH…
Mus pahari	Placental	MGP_PahariEiJ_G0024470	MKSHEKTLTNAEYEEIFQTVLQKSLRECLETSSCXQHIRPTKSDEKPGIVPSVTDKKNADPEKVVTPETPKIASSLEEEVNSEMGTSKLGQPVTEPSKKKFDRFSLSKQKEKAEDEKMEKIQDGHECTLKEKQKIVIQDQAQIRGHQKGGDSGFGHCVIWVQCSSPKCEKWRQLRGDIDPSVLPDDWSCDQNPDLNYNRCDIPEESWAGCEGDVAYASYVPGSIIWAKQYGYPWWPGMIEADPDLGEYFLFASHLDSLPSKYHVTFFGETVSRAWIPVRMLKNFQELSLELARVKKCKNKDSNQKLEAAIVMAHRAEQTSIQERVNLFGFWSRYNGADISGEGKEQNIHDTEKFSKKILESYLEGGTKQSWKAEGGRKLVEEGMGRVMEGRDQV
Mus spicilegus	Placental	ENSMSIG00000007568	MMAALQTHKEYEKGTKKTFAPPTQKLHSEKPQPSSWKEDAPGTSSPEAETKPSLLKASLKKEQKPTTEHGPNRGQERKLKAQDQPAKKKGKEKTLTSAEFEEIFQIVLQKSLQECLETSSCVQHIRPTKLDEEPSIVPPATHKKDADPEKVITPDTPKIASSLEEEVNSEMGTSKLGQPVTEPSKKKFNRLSLSKQKKKAEDEKMEKIQDGRECSLKEKQKIVIQDQSQIRGPQKEEESGFGHCVIWVQCSSPKCEKWRQLRGNIDPSVLPDDWSCDQNPDQNYNRCDIPEESWAGCESDVAYASYVPGSIIWAKQYGYPWWPGMIEADPDLGEYFLFASHLDSLPSKYHVTFFGETVSRAWIPVRMLKNFQELSLELVKKCKNKNSNEKLEAAIAMAH…
Mustela putorius	Placental	ENSMPUG00000015671	MTSLQSKEACGKGPKKTFAPPAPKLHSLMCYSPKPPKEDTVGISSPKARLEKKEEKATTENGPSSGQENKGKPQDKQVEKKEKERSSLTSAEFEEIVQIVLRKSLQECLETSCAQPIRCTQLDKEPGIASSTENDKADGERVMAPHILEISATKEAGVSSVIKMSKPGQPDPVPSEKKFNRTSLSKRKKGAQDDKMEKAQNTHEQRQKDQLKKPVQDDSQTRNQQKGEGSGFGQCLVWVQCSSPNCEKWRRLCGNVDPSVLPDNWSCDQNTDSRYNRCDIPEECWTGRESDVAYASYIPGSIIWAKQYGYPWWPGMVESDPDLGEYFLFASHLDSLPSKYHVTFFGETVSRAWIPVNMLKNFQELSLELARMKKCRNKDCNQKLGAALTMAQEAEQISI…
Myotis lucifugus	Placental	ENSMLUG00000009644	MMTTLQSKEEYGKGSKKPFIPPAQKVHSLMPYNPNSHKEETLGISSLEAEAGPNLLKAKLEKKEEEATTVNGPCSDQEKKVKVQDNKQAEKKEKEKSNLTDEEFEEIVQIVLQKSLQECLEIESSLDFAETSCAQPIRHTQLDKEPGIASSTTDNDNADREWVTVPHILEISASQEDGIIPSKPDQPDLASSEKKFSKLSLRRRKKKAHEKMKKAQRGHEHKQKDQLKKMVQDHAQIRDQQKGEESGFGQCLVWVQCSSPNCGKWRRLHGNADPSVLPDNWSCDQNTDLEYNHCDIPEETWIGHESDVAYASYIPGSIIWAKQYGYPWWPGMVESDPDLGEYFLFASHLDSLPSKYHVTFFGETVSRAWIPVNMLKNFQELSLELAGVKKCRNKDCSQK…
Nannospalax galili	Placental	ENSNGAG00000023314	MMAALQGNEEYEKGPKKTFVPPTQKSHSVKPPDANLLMENTPGISSPEAEAKRSPPQVSLKKKRKKNKKKAATENGASRDQEKKQKARGKPGEKKRKEKSTLTNEEFEEIFQTVLKKSLQECLESSCVQPRMYSQPDKEPGFTSSATGNENDDGEMAIASETPEISSSLDNKVVSEIRTLKLDQPVPEPPKKKFNRLPLNKRKKKTEDEKMESIQDGHEHRLEVLQKATIKDPSQIRSQQKEEKNGFGQCLVWVQCSFPKCEKWRRLLGNTDPSVLPDNWSCDQNPDVNYNRCDIPEETWTGCESDVTYASYVPGSIIWAKQYGYPWWPGMVESDPDLGEYFLFASHLDSLPSKYHVTFFGDAVSRAWIPVNMLKNFQELSLELTGVKKCKNKDYNQKL…
Neovison vison	Placental	ENSNVIG00000000812	IMTSLQSKEACGKGPKKTFAPPAPKLHSLMCYSPKPPKEDTVGISFPKARLEKKEEKATTENGPSSENKGKPQDKQVEKKEKERSSLTSAEFEEIVQIVLQKSLQECLEMGSSLDFTETSCAQPIRCTQLDKEPGIASSTENDNADGERVMVPHILEISATKETGVSSVIKTSKPGQPDPVPSEKKFNRTSLSKGKKGAHDKMEKAQSTHAQRQKDQLKKLVQDDSQTRNQQKGEGSGFGQCLVWVQCSSPNCEKWRRLCGNVDPSVLPDNWSCDQNTDSRYNRCDIPEESWAGHESDVAYASYIPGSIIWAKQYGYPWWPGMVESDPDLGEYFLFASHLDSLPSKYHVTFFGETVSRAWIPVNMLKNFQELSLELARMKKCRNKDCNQKLGAALTMAQ…
Nomascus leucogenys	Placental	ENSNLEG00000011728	MMTTLQNKEECRKGPKRIFAPPAQKSYSLLPCSPNSPKEETLGISSPETEARISLPKASLKKKEEKATMKNVPSREQEKKRKAQINKQAEKKEKEKSSLTNAEFEEIVQIVLQKSLQECLGMGSGLDFAETSCAQPIVSTQSDKEPGITASATDTDNANGEEVPHTQEISVSWEGEAAPEIRTSKLGQPDPAPSKKKSNRLTLSKRKKEAHEKVEKTQGGHEHREEDQLKKTVQHHSQIRDQQKGEISGFGQCLVWVQCSFPNCGKWRRLCGNIDPSVLPDNWYCDQNTDVQYNRCDIPEETWTGLESDVAYASYIPGSIIWAKQYGYPWWPGMIESDPDLGEYFLFTSHLDSLPSKYHVTFFGETVSRAWIPVNMLKNFQELSLELSVMKKRRNDCSQ…
Notamacropus eugenii	Marsupial	ENSMEUG00000001336	MMTTLKSKXXXXXXXXXXXXXXXXXXXXXXXXXXXXXXXXXXXXXXXXXXXXXXXXXXXXXXXXXXXXXXXXXXXXXXXXXXXXXXXXXXXXXXXXXXXXXXXXXXXXXXXXXXXXXXXXMDLGLGFSETSCVQRIEYSSGAKEKSTATTDVNRKLLGIPYSPAVPDSKEDGIIPGIQSPKSDPLPSEKKQNKLSLSKKRKQAXXXXXXXXXXXXXXXXXXXXXXXXXXXXXXXXXXXXXXXXXQCITWVQCSFPNCEKWRRLHRDIDPSVLPDDWSCSENTDVQFNHCDIPEEAWSESENDVIYAAYIPGSIIWAKQHGYPWWPGMIESDPDLEQYFLFGSPQEPLPSKYHVTFFGDVVSRAWIPSNMLKSFQDLSLKKIKNKDYSQKLMAALAMARE…
Ochotona princeps	Placental	ENSOPRG00000014795	MMATVQNKEECGKGPKKTFAPPTQKSHFLVPCDPKAPKTETLGVKAPEAKARPRPPKSRLEMNEEKADTENGSGIGQEQKGKTRSNKQAVKKEKGRSSLTNAEFEEIVQIVLQKSLQEYEXXXXXXXXXXXXXXXXXXXXXXXXXXXXXXXXXXXXXXXXEKMIVIHAAETSAPQEDKAVPVFRASKQGRPDPAPSEKKSNRPRLSKRKREAHEKMESGQGGHEHRQKNEPKKMIQDLSQISGEHTGDSGLGQYLVWVQCSSSNCEKWRRLHGNIDPSVLPDNWSCAQNPDLKYNSCDIPEESWTGRDSEVAYATYIPGSIIWAKQYGYPWWPGMVESDPDLGEYFLFASHLDLLPSKYHVTFFGETVSRAWIPVNMLKNFQELSLELTGMKKYRNKDF…
Oryctolagus cuniculus	Placental	ENSOCUG00000014388	MMAAVQNKEECGKGPKKTFAPPIQKLHFLKPCGPKAPKEEALGPSSPEAEARPSLPKARLEMNEEKTTTENGPSSGQEKKGKPQDNKQNKQAEKKEKGRSSLTNAEFEEIVQTVLRKALQECEGIGSDFHFSESSCAQLVVCTQSDKVPGIVASTGNDTADGERMMVIHTPEISAPQEDEVAPESRASKRGQPNPAPSEKKLSRPCLSKRKKEAQDEQVERVQGGHEHRQKDQPKKMIQDLSQIRGKQKEDKSGFGQYLVWVQCSSPNCEKWRRLHGNIDPSVLPDNWSCDQNTDLKYNSCDIPEETWTGCESEVAYATYIPGSIIWAKQYGYPWWPGMIESDPDLGEYFLFASQLDSLPSKYHVTFFGETVSRAWIPVNMLKNFQELSLELAGVKKCR…
Otolemur garnettii	Placental	ENSOGAG00000011012	MMTSLHNKEGCGKGPKKIFAPPTQKLHSLIPYSPNSSTEKTLGISSPESETRPCLPKARIKKKEEKATTENGPSSGQKKKGKAHDNKQAEKKAKEKSSLSDAEFEEIIQIVLQKSFQECLGGMGSGLDFAETSCAQPVVCTPSGKEPAITTSATDNDNTDREKIMVPHTPEISASQENEVISEIRTSKLGQLDPAPSEKKFNRFPVSKRKKEAHEKMEKVQGRHENRQTDQLKKMVQDHSQIKKQQKEKQSGFGQCLIWVQCSSPNCEKWRRLHGNIDPSVLPENWSCDQNTDLEFNRCDIPEETWTGCESDVAYASYVPGSIIWAKQYGYPWWPGMVESDPDLGEYFLFASHLDSLPSKYHVTFFGETVSRAWIPVNMLKNFQELSLELAGMKKYKNK…
Ovis aries	Placental	ENSOARG00000016980	MMPTLESKEKCGKGPKNTFAPPAQKLHSLMPYNLNSSKEEIPEISSPQAEVRPSLLKAGLEKKKEKTTTENGPGSGQEIQGKAQDSKNTKKEKEKSTLTDAEFEEIVQIVLRKSFQECLETSCTQPTRCTQLDKEPGIASSNTSDNNNADGDRVVVPPILEISASQEDGIIPEIKISKPGQPDSASSEKKFNKLSLSKRKKEAPSHKDEKMEKDQSEHEHRQDDQHKKTIQDHSQNGDQQKGEGNGFVTGQCLVWVQCSSPHCEKWRRLRGNIDPSVLPDNWSCDQNTDLQYNRCDIPEETWTGHESDVAYASYIPGSIIWAKQYGYPWWPGMVEPDPDLGEYFLFASHLDSLPSKYHVTFFGETVSRAWIPVNMLKNFQELTLELSGVRKCKNKDCSQ…
Pan paniscus	Placental	ENSPPAG00000036953	MMTTLQNKEECGKGPKRIFAPPAQKSYSLLPCSPNSPKEETPGISSPETEARISLPKASLKKKEEKATMKNVPSREQEKKRKAQINKQAEKKEKEKSSLTNAEFEEIVQTVLQKSLQECLGMGSGLDFAETSCAQPVVSTQSDKEPGITASATDTDNANGEEVPHTQEISVSWEGEAAPEIRTSKLGQPDPAPSKKKSNRLTLSKRKKEAHEKVEKTQGGHEHRQEDQLKETVQDHSQIRDQQKGEISGFGQCLVWVQCSFPNCGKWRRLCGNIDPSVLPDNWSCDQNTDVQYNRCDIPEETWTGLESDVAYASYIPGSIIWAKQYGYPWWPGMIESDPDLGEYFLFTSHLDSLPSKYHVTFFGETVSRAWIPVNMLKNFQELSLELSVMKKRRNDCSQ…
Pan troglodytes	Placental	ENSPTRG00000050515	MMTTLQNKEECGKGPKRIFEPPAQKSYSLLPCSPNSPKEETPGISSPETEARISLPKASLKKKEEKATMKNVPSREQEKKRKAQINKQAEKKEKEKSSLTNAEFEEIVQTVLQKSLQECLGMGSGLDFAETSCAQPVVSTQSDKEPGITASATDTDNANGEEVPHTQEISVSWEGEAAPEIRTSKLGQPDPAPSKKKSNRLTLSKRKKEAQDEKVEKTQGGHEHRQEDQLKETVQDHSQIRDQQKGEISGFGQCLVWVQCSFPNCGKWRRLCGNIDPSVLPDNWSCDQNTDVQYNRCDIPEETWTGLESDVAYASYIPGSIIWAKQYGYPWWPGMIESDPDLGEYFLFTSHLDSLPSKYHVTFFGETVSRAWIPVNMLKNFQELSLELSVMKKRRNDCS…
Panthera pardus	Placental	ENSPPRG00000004075	MMAMLQSKEEHGKGSKKTFAPPVQKMHSLMCYSPNSPKEETLGISSSKDRLEKKEEKATTENGPSSGQEKKGKAQDKQAEKKEKEKLSLTNAEFEEIVQIVLRKSLQECLGMMGSSLDFSETSCAQPIRRAQLDKEPGIASSTDNDNADGEKVMVPHILEISATKEAGVTSVIETPKPGQPDPPPSEKKFNRFSLSKGKKGAHEKMEKAQSGREPRQKAQLKKTVQNHSQIRNQQKGEVSGFGQCLVWVQCSSPNCEKWRRLCGNIDPSVLPDNWSCDQNTDLKYNRCDIPEESWIGHESDVAYASYIPGSIIWAKQYGYPWWPGMVESDPDLGEYFLFASHLDSLPSKYHVTFFGETVSRAWIPVNMLKNFQELSLELAGVKKCRNKDCSQKLGVALM…
Panthera tigris	Placental	ENSPTIG00000016293	MMATLQSKEEHGKGSKKTFAPPVQKIHSLMCYSPNSPKEETLGISSSKDRLEKKEEKATTENGPSSGQEKKGKAQDKQAEKKEKEKLSLTNAEFEEIVQIVLRKSLQECLGMMGSSLDFSETSCAQPIRRAQLDKEPGIASSTDNDNADGEKIMVPHILEISATKEAGVTSVIETPKPGQPDPPPSEKKFNRFSLSKGKKGAHEKMEKAQSGREPRQKAQLKKTVQNHSQIRNQQKGEVSGFGQCLVWVQCSSPNCEKWRRLCGNIDPSVLPDNWSCDQNTDLKYNRCDIPEESWIGHESDVAYASYIPGSIIWAKQYGYPWWPGMVESDPDLGEYFLFASHLDSLPSKYHVTFFGETVSRAWIPVNMLKNFQELSLELAGVKKCRNKDCSQKLGVALM…
Papio anubis	Placental	ENSPANG00000019546	MMTTLQNKEECGKGPKRIFAPPAQKSYILLPCSPNSPKEETLGISSPETEASISLPKASLKKEEEKATTKNGPSRGQEKKRKAQNNKQAEKKEKEKSSLTPAEFEEIVQIVLQKSLQECLGMGSGLDFAETSCPQPIVSNQSAKEPGITAAATDTDNANGEEVPHTQEISASWEGEAAPEIRTSKLGQPDPVPSKKKSNRLTLSKRKKEAQDEKVEKTQGGHEHRQEDQLKETVQDHSQIRDLQKGEISGFGQCLVWVQCSFPNCGKWRRLCGNIDPSVLPDNWSCDQNTDVQYNRCDIPEETWTGLESDVAYASYIPGSIIWAKQYGYPWWPGMIESDPDLGEYFLFTSHLDSLPSKYHVTFFGETVSRAWIPVNMLKNFQELSLELSGMKKRRNDCS…
Paramormyrops kingsleyae	Bony fish	ENSPKIG00000021728	KKEKLPRERKEATVQKPEAKKEYKDRLEEHTEDQCEHDDRWVQCSISRCKKWRKLDKHVDLSVLPPKWTCVQKPDCYNCNCPEETWSGSQDDVVHSSLVPGSLVWAQLQGYPWWPAMTESDPDSKSIFFFNNIDRFPSKYHVTFFGDPVTRAWVPSCKVKSFETFSETTALKVSYLTHHGSITIFRDQTVPEIPVGGGRGEKESQKLVSLDGEKTLRKEVTEKKGAGWEMKEKKGGITAKKLCSQRVKLEESAEDLVQEDMEILSYQDIFKQAEKDEKYSFTFFEEE
Peromyscus maniculatus	Placental	ENSPEMG00000000504	MMATLQNYEESEKGTKKTFAPPTQKPHIVKPQPKSWKEETLGTSSPEAEAKPSRPKASSKKREQKTATEHGPSGGQEKKQKAQDKPAEKKGKEKPTLTNAEFEEIFQSVLQKSLQECLETSCAQPIIPTKSDREPGIAPSADNENADGEKVIVPDTPEIASSLEEEVSSETRTSKSGQPVTEPSKKKFNRLFSSKRKKKAEDEKIQDGHECSLKAKQKTMIQDHSQIRGQQKEEEGGFGQCLIWVQCSSPKCEKWRQLRGGIDPSVLPDNWSCDQNPDLNYNRCDIPEETWTGCESDVAYASYVPGSIIWAKQYGYPWWPGMIESDPDLGEYFLFASHLDSLPSKYHVTYFGETVSRAWIPVSMLKNFQELSLELARVKKCKNKDYGQKLEAAIRMAHK…
Petromyzon marinus	Jawless fish	ENSPMAG00000006640	IWVQCSNQACSKWRRLHNASDTSVLVDVWTCDMNKDTMYNSCSTAEEDCSYESDVETDLQPGSLVWAKQFGYPWWPGMVENDPETEKYFLASKKKGVAPMKYHVTFFDNVSSRSWIPTYFIKPFENSMENMFSTKGQNGRYFTKRIADAVRKANCATKMSMQKRLDEFGFSETYN
Phascolarctos cinereus	Marsupial	ENSPCIG00000012277	MMATLKNKEGGNGQKKAFTPPGQKACTMMPSSLDAPENEETQEMGLPEENARQDQLKDKIQKKKKEKVTRKSSGSDKEGKGPLATKTSKEQDTKGNERKTEKETPSLTNEQFEEIVQCVLKKSLQECLDVTCETSHAQRIEYSPGAKETSTTTTDVDRKLPGISHSTDIPVSTEDKIVPGTQSSTSDPLPSEKKQNKLSLSKKRKEAKDEKPELTKSDYKHRRKGQPRKIVQGYTQISDQEEAGGEWTSNFSQCVAWVQCSFPKCEKWRRLHGNIDPSVLPDDWSCSQNTDLQFNHCDIPEETWSGGESDVVYASYIPGSIIWAKQYGYPWWPGMVESDPDLGEYFLFASQQDVLPSKYHVTFFGDTASRAWIPSSMLKNFQELSLEQIEPKKIKNRDC…
Piliocolobus tephrosceles	Placental	ENSPTEG00000024884	MMTTLQNKEECGKGPKRIFAPPAQKSYSLLPCSPNSPKEETLGISSPETEASISLPKASLKKEEEKATTKNGPSRGQEKKRKAQNNKQAEKKEKEKSSLTPAEFEEIVQIVLQKSLQECLGMGSGLDFAETSCAQPIVSTQSAKEPGITASATDTDNANGEEVPHTQEISVSWEGEAAPEIRTSKLGQPDPVPSKKKSNRLTLSKRKKEAHEKVEKTQGGHEHRQEDQLKETVQAHSQIRDLQKGEISGFGQCLVWVQCSFPNCGKWRRLCGNIDPSVLPDNWSCDQNTDVQYNRCDIPEETWTGLESDVAYASYIPGSIIWAKQYGYPWWPGVIECDPDLGEYFLFTSHLDSMPSKYHVTFFGETVSRAWIPVNMLKNFQEMSLELSGMKKRRNDCSR…
Podarcis muralis	Squamata	ENSPMRG00000012166	MQEKAEADRGGSGCSWCMAWVQCSYPTCEKWRRLSSDIDPSVLSEDWTCSQNPDLEHNSCSIPEETWSGSENEVVYAVYIPGSIVWAKQYGYPWWPGIIEADPDIGEYFLFSSQADSLPCKYHVTFLGSSVTRAWISASMLRNFEESYAKGNGVAKLKNKGDKRDFEAAVKMANEAEQLSIQERIRIFGFYSRFSGRESPKNNRDLKDHVHVTCKPPAKRIREPKGGKKNVSASNKSQEKLLPETPVMKSDGDFKKKSNIKGAKKSKSSTEGTPLSSKKSRKEMAVPKAAAVPKGSVQTKARCDAQKGSKSSFAAPWSKSATAEQLSSCRYGSSPPLTPSSYPSKEDSMSKADVSPVAESELMLNRGVVGLEESSEAVAQEKEDDETFSSQEMAVFAEE…
Pogona vitticeps	Squamata	ENSPVIG00000010752	MPQRTFAPPVAKPNHAPFAKGKLEAPQSRQEDGVATKPIKIPPKKSNQKQEMNTSSTATPLKCRKDGVMGKERENYLTDAQYDEIFRSVLQKPLQECMEISGMKGVSVEANKEQILGRETLTASPTSKDDVYGKISKENSERMPLEAKKKEHPLGMKKYGKCFQHNNKGKEKNEKPEADNGGCKENRKGAPKKKVKGNTQVVIDQEEMQEEEKSDRGSGSCWCIAWVQCSSPTCKKWRQLPSDIDPSVLPEDWSCSQNTDLQCNSCSVPEETWSGSENEVVYAVYIPGSIVWAKQYGYPWWPGLIEADPDIEEYFLFSSQMDLLPSKYHVTFFGSSVTRAWISASSLRNFSEANVKENGLAKLKNKADKRDLETALKMAKEAEQISIQERIRRFGFFSR…
Pongo abelii	Placental	ENSPPYG00000017410	MMTTLQNKEECGKGPKRIFAPPAQKSYSLLPCSPNSPKEETLGISFPETEARISLPKASLKKKEEKATMKNVPSREQEKKRKAQINKQAEKKEKEKSSLTNAEFEEIVQIVLQKSLQECLEEVPHTQEISMSWESEAAPEIRTSKLGQPDPAPSKKKSNRLTLSKRKNEAHEKVEKTQGGHEHRQEDQLKKTVQDHSQIRDQQKGEISGFGQCLVWVQCSLPNCGKWRRLCGNIDPSVLPDNWSCDQNTDVQYNRCDIPEETWTGLESDVAYASYIPGSIIWAKQYGYPWWPGMIESDPDLGEYFLFTSHLDSLPSKYHVTFFGETVSRAWIPVNMLKNFQELSLELSVMKKCRNDCSQKLGVALMMAQEAEQISIQERVNLFGFWSRFNGSNSNGERK…
Prolemur simus	Placental	ENSPSMG00000001508	MMTTLQNKEECGKGPKKIFAPPAQKLHSLIPCSPNFPKEETLGISSPETETRPHLPKARLEKKEEKATTENGPSSGQKKKGKAQDNKQVEKKAKEKSSISNAEFEEIVQIVLRKSLQECLGMGSGLDFAETSCAQPIVCTQSDKEPAITTSATDNHNADEKVMVPHTPEISASQDNDVVSEISTSKLGQPDPAPSGKKFNRLPLSKRKKEAHEKVEKVQGGHEHRQKDQLKKMIQDHSQIRNQQKRKQSGFGQCLIWVQCSSTNCEKWRRLRGNIDPSVLPDNWSCDQNTDLQYNSCDIPEETWTGHESDIAYASYIPGSIIWAKQYGYPWWPGMVESDPDLGEYFLFASHLDSLPSKYHVTFFGETVSRAWIPVNMLKNFQELSLELAGVKKYRNKDC…
Propithecus coquereli	Placental	ENSPCOG00000016495	MGSGLDFSETSCAQPIVCTQSDKEPAITTSATDSDNADREKVMVSHTPEISASQDNDVVSEISTSKSGQPDPAPSGKKFNRLPLSKRKKEAQDEKMEKVQGGHEHRQKDQLKKMVQGHSQIRNQQKGKQSGFGQCLIWVQCSSPNCEKWRRLRGNIDPSVLPDNWSCDQNTDLEYNSCDIPEETWTGHESDIAYASYIPGSIIWAKQYGYPWWPGMVESDPDLGEYFLFASHLDSLPSKYHVTFFGETVSRAWIPVNMLKNFQELSLELAGGSCVGKKNNLKLPKARPQQPAYVRKKEAEWYHRA
Pteropus vampyrus	Placental	ENSPVAG00000011995	MMTALQSKEEYGKGSKKSFAPPAQKLHSLIPDSLNSPKEETLGISSLETEARPNLLKARLKKKEKATTENGSSNGQEKKVKAQDNKQKEKKEKEKSSLTNAEFEEIIQIVLQKSLQQSLGMESSLGFPETSCAQPIRYTQFDKEPGITSSTTDNDNTDGERVMVPHILEISASQEGGVIPEIKMSKPXXXXXXXXXXXXXXXXXXXXXXXXXEKMKKAQSEHKHRQKDQPKKMVQDHSQFMDQQKREESGFGQCLVWVQCSFPNCEKWRRLRGNIDPSVLPDNWSCDQNTDLEYNCCDIPEETWTGRESDVAYASYIPGSIIWAKQYGYPWWPGMVESDPDLGEYFLFASHLDSLPSKYHVTFFGETVSRAWIPVNMLKNFQELSLELARVKCRNKDCS…
Rattus norvegicus	Placental	ENSRNOG00000052199	LMAALQSHREYEKGTKKTFAPPTQKSHIEKPRPNSWKEDTPGTSSLEAETKPSLLKASLKKKQKATTEHGPSRGQEKKQKAHDQPAEKKGKEKTLTSAEFEEIFQIVLQKSLQECLETSCIQRIRPTKSDKEPGIAPSATDKENADPEKVITPDTPDIASSVEEGVNSEMGTSSLCQPGTEPSKKKWDRRSLSKQKKKAEDEKMEKIQDERECTLKEKQKIMIRDQKEEEGSFGHCVIWVQCSSPKCEKWRQLRGDIDPSVLPDDWSCDQNPDLNYNRCDIPEESWTGCESDVAYASYVPGSIVWAKQYGYPWWPGMIECDPDLGEYFLFASHLDSLPVSFLVLAQEGVPQKTNNRGLYQYQELKHLQLRDLGVVKKCKNKDSTQKLEAAISMAHRAEQ…
Rhinolophus ferrumequinum	Placental	ENSRFEG00010003404	MMTTLQSKEEYGKGPKKSFAPPTQKLHSLMPYSPNSPAEESLGISSPEAQARPNLLKAKLEKKKAKATTKNGPSSGQEKKVKAQDNKQAKKKKKEKSSLTNAEFEEIVQLVLQKSLQQSLGMESSLDFAETSCAQPLRCTQLDKEPGIASSTTDNDNADGERVMVPHILEISTSQEDGVIPEIKTSKPGQPGPVPRKKKFNRLSLSKRKKEAHEKMQKSQSGHEHRQKYQPKKMVQVHSQTIDQQKGEESGFGQCVVWVQCSFPNCEKWRRLRGNIDPSVLPENWSCNQNTDLEYNRCDIPEETWAGRESDVAYASYIPGSIIWAKQYGYPWWPGMVESDPDLGEYFLFASHLDSLPSKYHVTFFGETASRAWIPVNMLKNFQELSLELAGVRKYKNKD…
Rhinopithecus bieti	Placental	ENSRBIG00000034150	MITFLSECGKGPKRIFAPPAQKSYSLLPCSPNSPKEETLGISSPETEASISLPKASLKKEEEKATTKNGPSRGQEKKRKAQNNKQAEKKEKEKSSLTPAEFEEIVQIVLQKSLQECLGMGSGLDFAETSCAQPIVSTQSAKEPGITASATDTDNANGEEVPHTQEISVYWEGEAAPEIRMSKLGQPDPVPSKKKSNRLTLSKMKKEAHEKVEKTQGGHEHRQEDQLKETVQAHSQIRDLQKGEISGFGQCLVWVQCSFPNCGKWRRLCGNIDPSVLPDNWSCDQNTDVQYNRCDIPEETWRGLESDVAYASYIPGSIIWAKQYGYPWWPGMIESDPDLGEYFLFTSHLDSLPSKYHVTFFGETVSRAWIPVNMLKNFQELSLELSGMKKRRNDCSQKLG…
Rhinopithecus roxellana	Placental	ENSRROG00000028354	MITFLSECGKGPKRIFAPPAQKSYSLLPCSPNSPKEETLGISSPETEASISLPKPSLKKEEEKATTKNGPSRGQEKKRKAQNNKQAEKKEKEKSSLTPAEFEEIVQIVLQKSLQECLGMGSGLDFAETSCAQPIVSTQSAKEPGITASATDTDNANGEEVPHTQEISVSWEGEAAPEIRMSKLGQPDPVPSKKKSNRLTLSKMKKEAHEKVEKTQGGHEHRQEDQLKETVQAHSQIRDLQKGEISGFGQCLVWVQCSFPNCGKWRRLCGNIDPSVLPDNWSCDQNTDVQYNRCDIPEETWRGLESDVAYASYIPGSIIWAKQYGYPWWPGMIESDPDLGEYFLFTSHLDSLPSKYHVTFFGETVSRAWIPVNMLKNFQELSLELSGMKKRRNDCSQKLG…
Saimiri boliviensis	Placental	ENSSBOG00000030772	MMTTLQNKECGKGPKRIFAPPAQKSYNLIPFSPNSPKKETLGISSPKTEARISLPKARLKKEEKATTNNASSRGQEKKRKAQNNKQAEKKEKEKSSLTNAEFEEIVQIVLQKSLQECLGMGSGLDFAETSCAQPIVSTHSDKEPGITASATDTDNADGEEVPHTQEISVSWEGEAVPEIRTSKLGQPDPAPSEKKSSRLSLSKRKKEAGHEKVEKTQSGHELRQKDQLKKTVQDHSQIRDQQKGEISGFDQCLVWVQCSFPNCGKWRRLCGNVDPSVLPDNWSCDQNTDMEYNRCDIPEETWTGLESDVAYASYVPGSIIWAKQYGYPWWPGMIESDPDLGEYFLFTSHLDSLPSKYHVTFFGETVSRAWIPVNMLKNFQELSLEPSGMKKHRNKDCSQ…
Salmo trutta	Bony fish	ENSSTUG00000003472	METVAGQKEKAKFAPLVPREKKPGHGEKGEVKKSENKWKEEGGGNKERNIDVGKKTGESCEGERGVESKGKASESEKKRGERMKKEGKKKMADTEKARAAEGERGGEGVKENKKQKNKEEDQSSKETDQGKERMNVKKKKKENEVRKEGKDTKKKRQRDETESNKKVVPLTDSQYDDIFGSATALETTVDNCLEDARDVLSEVELLQATIDQVSLREEEEPRRRVSGERKTPASGSHTQRKRQRKREEEEDSDSSEEFDQWVQCSRSVCGKWRKVERQVDLAALPSDWTCTHDTGPGLCEAAEDSWSGQECDVINSSLVPGSLVWAQQIGYPWWPAIVERDPDTKTFCQFNRNTDLYPCRYHVTYLGEPASRAWVCRSKVRNYTELTEDAAITGKSLQR…
Sarcophilus harrisii	Marsupial	ENSSHAG00000000181	MRDSSYLCLILGQCIAWVQCSFPSCAKWRRLLGNTDPSVLPDDWSCSQNTDLQFNHCDIPEENWSGCETDVVYASYIPGSIIWAKQYGYPWWPGMVESDPDLGEYFLFASQQDVLPSKYHVTFFGDTASRAWIPSNMLKNFRELSLEQVEPKRIRNKDCSQKLMAALVMAQDAQRISIQDRLSLFGFHIRYKEDAAESGSSEEGRDLFFQEAKKPHRAGNSNSYISKEENKESCSTKCNLGCTSKKKLKLKGVGDMTDEQDETPKRKKNKFPSQDSTSVEEKGSSGNSHPDQSGLNKKFTAPQRKTTVTKLPGNRGKSAFQNQFPPTPSQALPLVEAGKKSDPQWSLILMSRNPPPENKGSNDLNPEQLMEEVREGINQKVEQQIPIAEKDEISLVLSEE
Sorex araneus	Placental	ENSSARG00000003187	TMTTLQNNEGKKGPKKTFAPPAQKLHSLVFESPNSPMEGTSGNVSAEAEGKPNLLVANLQKKEKTSTKNDPSRGREEEGKVQASKQAEKKEKIKSSLTDEEFEDIVKIVLQKYCQKHLGMESSLDFAETACTQSIECTQLDKEPDKEPSTNNGDADREQVVKPHSPELSTSQENVMIPEVKTSASGQPDPSPSEKKKFDKLLLSKKKKKIHDIMVKVQNEQNNHKDQPKKIVEPHCQIRDQQKGEGSGFDQCLVWVQCSSANCKKWRRLHGDIDPAALPENWSCDQNTDSQYNCCTAPEEIWTGGEGEVAYASYIPGSIIWAKQYGYPWWPGMVESDPDLGEYFLFASHLDSLPSKYHVTFFGETVSRAWIPVSMLKNFQELSWELSGVKKCKNKDCSK…
Spermophilus dauricus	Placental	ENSSDAG00000021721	MMTTLQKKEECGKGSKKPFAPPTQKLHSMIPHGPNSHRDETLGISSPVAEAKANPPKARLEKEEKATTEDGPGVGQEKKGKAQDKPAEKKEKGKSSLTNAEFEEIVQIVLQKSLQECLETTCRPTQSDKEPGIASATDNSNAVGERKMIPHTPETSASVEDVPEIRTSKSAQLVPAPSEKKFNRLSLSKRKREAQDEKMEKVQGGHECREKDHPEKIIQGDSQIRGQQKGEESGFGQCLVWVQCSSPNCEKWRRLRGNIDPSILPDNWSCDQNTDLDYNRCDIPEEIWTGRESDVAYASYVPGSIIWAKQYGYPWWPGMVESDPDLGEYFLFASHLDSLPSKYHVTFFGETVSRAWIPVNMLKNFQELSLELAGVKKCRNKDYSQKLVAAIMMAQKAEQ…
Suricata suricatta	Placental	ENSSSUG00005010144	MMAMSQSKEEHGKGSKKAFAPPAQKMHSLMCYSPNSPKEESLGVSSLKARLEKKEKKATTENGPSSGQRKKGKAQDKQTEKKEKEKLSLTNTEFEEIVQIVLQKSLQECLEASCAQPVRRTQLEKEPGIASSTDNDNADGEKVMVPHILEISATKETGVTSVIKTSKPGQADPAPSENKFNRFSLSKRKKRAHEKMEKAQSGCDPRQKAQLKKTVQNHSQIRNQQKGEGSGFGQCLVWVQCSSPNCEKWRRLCGNIDPSVLPDNWSCDQNTDLKYNRCDIPEESWTGRESDVAYASYIPGSIIWAKQYGYPWWPGMVESDPDLGEYFLFASHLDSLPSKYHVTFFGETVSRAWIPVNMLKNFQELTLELSGVKKCRNKDCNQKLGAALMMAQEAEQISI…
Sus scrofa	Placental	ENSSSCG00000007659	MMTTLQNKEGCGKGAKKTFAPPAQKFRSLMPYSLNSAKEEILEISPPGAEAPPSLQKAGLEKKEKVTTEDGPDSGQEIKGKAQDNKKAEKKEKEKSSLTNAEFEEIVQIVLQKSLQECLGMESSLDFAETSSAQPTRCTQLDKEPGITSTTDNENADGERVVVPHNLEISASQEDGIIPEIKTSKPGQPDPAPSEKKFSRLSLSKREKKAHLKMEKTQSGYEHRQKDQLKKVVQDHSQFRDQQKGEGSGFDQCLVWVQCSSPNCEKWRRLRGNIDPSVLPDNWSCDQNTDAEYNRCDIPEETWTGHESDVAYASYIPGSIIWAKQYGYPWWPGMVESDPDLGEYFLFASHLDSLPSKYHVTFFGETVSRAWIPVNMLKNFQELSPELAGVKKCRNKDCS…
Terrapene carolina	Turtle	ENSTMTG00000020838	NKERHKRHRKGEPKKIVQGYTLIADQAETEEGGENQCVAWVQCSYPSCEKWRRLSSDTDPSVLPEDWTCSQNTDLQYKSCDVPEEMWSGSENEVVYATYVPGSIIWAKQFGYPWWPAMVECDPDIGEYFLFSSRLDSLPSKYHVTFFGESVSRAWISATMLRNFHVFSTESLGLVNSGFPQGSALGPVLFNTFVNDLERGVNSEVAKFRELKKLTMLGTIRKGIANKTEDFVMPLYKSMVHPYLEYCVQIWSPHLKKDILELEKMQRRATKMIRSMEQLPYEERLKSLGL
Theropithecus gelada	Placental	ENSTGEG00000010533	MMTTLQNKEECGKGPKRIFAPPAQKSYSLLPCSPNSPKEETLGISSPETEASISLPKASLKKEEEKATTKNGPSRGQEKKRKAQNNKQAEKKEKEKSSLTPAEFEEIVQIVLQKSLQECLGMGSGLDFAETSCAQPIVSNQSAKEPGITASATDTDNANGEEVPHTQEISVSWEGEAAPEIRTSKLGQPDPVPSKKKSNRLTLSKRKKDAHEKVEKTQGGHEHRQEDQLKETVQDHSQIRDLQKGEISGFGQCLVWVQCSFPNCGKWRRLCGNIDPSVLPDNWSCDQNTDVQYNRCDIPEETWTGLESDVAYASYIPGSIIWAKQYGYPWWPGMIESDPDLGEYFLFTSHLDSLPSKYHVTFFGETVSRAWIPVNMLKNFQELSLELSGMKKRRNDCSQ…
Urocitellus parryii	Placental	ENSUPAG00010017970	MMTTLQKKEECGKGSKKPFAPPTQKLHSMIPNGPNSHRDETLGISSPVAEAKASPPKARLEKEEKATTEDGPGVGQEKKGKAQDKPAEKKEKGKSSLTNAEFEEIVQIVLQKSLQECLETTCRPTQSDKEPGIASATDNDNAVGERKMIPHTPETSASVEDVPEIRTSKSAQLVPAPSEKKFNRLSLSKRKREAQDEKMDKVQGGHECREKDHPEKIIQGDSQIRGQQKGEESGFGQCLVWVQCSSPNCEKWRRLRGNIDPSILPDNWSCDQNTDLDYNRCDIPEEIWTGRESDVAYASYVPGSIIWAKQYGYPWWPGMVESDPDLGEYFLFASHLDSLPSKYHVTFFGETVSRAWIPVNMLKNFQELSLELAGVKKCRNKDYSQKLVAAIMMAQKAEQ…
Vicugna pacos	Placental	ENSVPAG00000000217	MMTTLQSKEGWGRGRKKTVAPPAQKWHSLWPCSLNSSKEEILGISSPTRPSLQARLEKKEEKATTENGPGGGQEIKRKAQNNKKAEKKEKEKSSLTDAEFEEIVQIVLRKSLQECLGMESSLDFAETSCAQPTRCTQLDKEPGISSSVTDNDSADGEVVPHILEISASKEGGVIPEIKTSKPGHPDPASSEKKFGRFSLSKRKKEAHEKMEEAQSGHEHRQKDQLKKIVQGHSQIRDQQKREGSGFGQCLVWVQCSSPNCEKWRRLRGNIDPSVLPDNWSCDQNTDLEYNRCDIPEETWIGRESDVAYASYIPGSIIWAKQYGYPWWPGMVESDPDLGEYFLFASHLDSLPXXXXXXXXXXXXXXXXXXXXXXXXXXXXXXXXXXXKKCRNKDCSQKLG…
Vombatus ursinus	Marsupial	ENSVURG00010000288	MMTTLKNKEGGKGPKKAFTPPGQKTCTVIPCSLDAPDNEETQGIGLLGVNTSQDQPKDKTQKKKKEKVTRKSSGNDKEGKGPLATKTGKEQDTKGNERKTEKETTNLTSEQFEEIVQCVLKKSLQDCLDMTCETSCAQRIEYSPGTKETSTATTEVDRKLLGIPYSPAIPVSKEEKIVAGTQSPKSDPLPSEKKQNKLSLSKKRIEAKDEKPELTKSGHKHRRKGQPKKIVQGYTQISDQEEAGGERTSNFSQCIAWAQCSFPKCEKWRRLHGNIDPSVLPDDWSCSQNTDLQFNHCDIPEETWSGGESDVVYASYIPGSIIWAKQYGYPWWPGMVESDPDLGEYFLFASQQDVLPSKYHVTFFGDTASRAWIPSNMLKNFQELSLEQIEPKKIKNKDC…
Vulpes vulpes	Placental	ENSVVUG00000023416	MMAMLQSKEECGKGPKKTCTPSAQKLYSMMCYSPNSSKEESLGVSSPKTRLKKKEEKTTTENGSSSGQENKGKPQDKQAEKEKEKSSLTNAEFEEIVQIVLRKSLQECLETSCAQPIRCTLLDKEPGIAASTDNDNADGKKNIILRERVMVPHILEISATQEAGVTSVIKTSKPSQPDPAPSEKKSNRPFLSKGEKGAQDEKMEKTQSGHEHRQKDQLKKTVQVDSQIRNQQRGKGGGFGQCLVWVQCSSPNCEKWRRLCGNIDPSVLPDDWSCDQNTDLKYNHCDIPEESWTGRESDVAYASYIPGSIIWAKQYGYPWWPGMVESDPDLGEYFLFASHLDSLPSKYHVTFFGETVSRAWIPVNMLKNFQELSLELAGVKKCRNKDCNQKLGAALMMAQ…

## Sheet: OrthoDB Orthologs
ZCWPW1 orthologs retrieved from OrthoDB. All orthologs were screened by PrositeScan or NCBI conserved domain (CD) for presence of both zf-CW and PWWP domains. Any ortholog that lacks either one of the two domains in both PrositeScan and NCBI CD was excluded. For each species with multiple orthologs isoforms, the longer isoform is reported in this table.
Species	Clade	Sequence
Acinonyx jubatus	Placental	MMATLQSKEEHGKGSKKTFAPPVQKMHSLMCYSPNSPKEETLGISSSKDRLEKKEEKATTENGPSSGQEKKGKAKDKQAEKKAKEKLSLTNAEFEEIVQIVLRKSLQECLETSCAQPIRRTQLDKEPGIASSTDNDNADGEKVMVPHILEISATKEAGVTSVIETPKPGQPDPPPSEKKFNRFSLNKGKKGAQDEKMEKAQSGREPRQKAQLKKTVQNHSQIRNQQKGEGSGFGQCLVWVQCSSPNCEKWRRLCGNIDPSVLPDNWSCDQNTDLKYNRCDIPEESWIGHESDVAYASYIPGSIIWAKQYGYPWWPGMVESDPDLGEYFLFASHLDSLPSKYHVTFFGETVSRAWIPVNMLKNFQELSLELAGVEKLCWEKVPCLTKCARVRLFMRDSSF…
Ailuropoda melanoleuca	Placental	MMTTLQSKEECGKGPKKTFAPPAQKLHSPMGYSPDPPKEETLGISSPKARLEKKEEKATTENGPRSGQEKKGKPQDKQAEKKEKEISSITNAEFEEIVQIVLQKSLQECLETSCAQPIRCTQLDKDPGIASSTDNGNADGERVMVPHILEMSATQEAGVTSVIKTSKPGQPDPAPSEKKSNRRSLSKGKKGSHEKMEKARSGHEQKQTDQLKKPVQDDSQTRNQEKGEGGGFGQCLVWVQCSSPDCEKWRRLCGNIDPSVLPDNWSCDQNTDSRYNRCDIPEESWTGRESDVAYASYIPGSIIWAKQYGYPWWPGMVESDPDLGEYFLFASHLDSLPSKYHVTFFGETVSRAWIPVNMLKDFQELSLELAGGKKFRNKDCNQKLGAALTMAQEAERISI…
Anolis carolinensis	Squamata	MPGPEDKELKKRPKKVFASPVRLCHSPILKGKSDGLPGKQEDVEEVPDLLSHAAGDGVATRPMKAVRNPNKRKKEGTSRKKDSEMSKEKEGCLTDAQFEKIFQSALQRPLQECIENSGREGFSAESPEEKSLGRGTLEVSLAAKNGVSRNKSVVKNKPMPLETEKKAHRFGKKHQSKLSASKNAEGENEEPGADNGGCKENRKAAPKKKVQGNAPVVIDREEMQEEEEEEEEEAGRGGSGSSELNPPSCSSWCIAWIQCSDPNCHKWRRLSSKTDPSVLPEDWSCSQNLDLQYNSCSISEESWSGTEGEIVYAAYVPGSLVWAKQYGYAWWPGVIEADPYLGEYLLFSSQTDSLPSKYHVTFFGKTVSRAWISASMLRNFAGSSMEKGNGLDKPKSQTG…
Aotus nancymaae	Placental	MFHKFHLITFLSECGKGPKRIFAPPAQKSYNLIPFSPNSPKEETLGISPPETEARISLPKARLKKEEKATTNNASSRGQEKKRKAQNNKQAEKKEKEKSSLTNAEFEEIVQIVLQKSLQERLGMGSGLDFSETSCAQPIVSTQSDKEPGITASATDTDNADGEEVPQAQEISVSWEGVAVPEIRTPKLGQPDPAPSEKKSSRLSLSKRKTEAGDEKVEKTQSGHELRQKDQLKKTVQDHFQIRDQQKGERSGFDQCLVWVQCSFPNCGKWRRLCGNVDPSVLPDNWSCDQNTDMEYNRCDIPEETWTGLESDVAYASYVPGSIIWAKQYGYPWWPGMIESDPDLGEYFLFTSHLDSLPSKYHVTFFGETVSRAWIPVNMLKNFQELSLEPSGMKKCRNK…
Astyanax mexicanus	Bony fish	MDEKHGNKEKSAIVSPISQANNTESNKTKVEVKTAMTNGQSEEKKKGKGSKPGETDERTGYEQLKPSQAEKEPRKRVHEQEMNGAVVGTKRGKVEMNGREDEETTKEKTENENDQVVQRSAEEIDDETQQTTASNFELLEAMLDYSLSGLIEDTKAMLTEVESMQSCIQQKAHRDEQERGSCSTTLDKESKKEMKGRSVCEKEEVNSESDEYVVWVQCSKANCGKWRKLDEDVDPSMLPDDWICENNPDPAFCSCSAPEEQSSMCEEKIFFSNLVPGSLVWVQQNGHFWWPAMVQRDPETDDYLEFHRKTDLDPCKCHVTYFGDPVCIGWVLCSNVRNYADLSENDVLSMLEFQELKEKLKDAICMSKQALDLSPQMRLVKFGFWTRYDSEEDSDVREV…
Balaenoptera acutorostrata	Placental	MMTTLQSKDECGKGPKKTFAPPAQKLQSLMPCNLNSSKEEILGISSPEAETRPSLLKARLEKKKEKTTKENGTGSGQEIKGRAQDNKKAEKKEKGKSTLTNAEFEEIVQIVLQKSLQECLETSCAQPTRCTQLDKEPGIASSTTDNNNADGERVVVPHILEISASQEGGVIPEIKTSKPGQPDPAPSEKKFNKLSLSKRKKAAQDEKMEKAQSGHEHKQKDQLKKTVQDHSQIRDQQKGEGSGFGQCLVWVQCSSPNCEKWRRLRGNIDPSVLPDNWSCDQNTDLEYNHCDIPEETWTGHESEVAYASYVPGSIIWAKQYGYPWWPGMVESDPDLGEYFLFASHLDSLPSKYHVTFFGETVSRAWIPVNMLKNFQELSLELAGVKKCRSKDCSQKLGAA…
Bison bison	Placental	MPTLESKEKCGKGPKNTFAPPAQKLHSLMSYNLNSSKEEILEISSPQAEVRPSLLKAGLEEKKKKKKTTTENGPGNGQEIQGKAQDSKNAKKEKEKSTLTNAEFEEIVQIVLQKSFQECLETSCTQPTRCTQLDKEPGIASSNTSDNNNADGDRVVVPPILEISASQEDGIIPEIKISKPGQPDSASSEKKFNKLSLSKRKKEAQDEKMEKDQSGHEHRQDDQHKKTIQDHSQNRDQQKGEGSGFGQCLVWVQCSSPNCEKWRRLRGNIDPSVLPDNWSCDQNTDLQYNRCDIPEETWTGHESDVAYASYIPGSIIWAKQYGYPWWPGMVEPDPDLGEYFLFASHLDSLPSKYHVTFFGETVSRAWIPVNMLKNFQELTLELSGVRKCKNKDCSQKLLV…
Bos grunniens	Placental	MMPTLESKEKCGKGPKNTFAPPAQKLHSLMSYNLNSSKEEILEISSPQAEVRPSLLKAGLEKKKKKKKTTTENGPGNGQEIQGKAQDSKNAKKEKEKSTLTNAEFEEIVQIVLQKSFQECLGMAFIFSFGRMESSLDFSETSCTQPTRCTQLDKEPGIASSNTSDNNADRVVVPPILEISASQEDGIIPEIKISKPGQPDSASSEKKFNKLSLSKRKKEAHEKMEKDQSGHEHRQDDQHKKTIQDHSQNRDQQKGEGSGFGQCLVWVQCSSPNCEKWRRLRGNIDPSVLPDNWSCDQNTDLQYNRCDIPEETWTGHESDVAYASYIPGSIIWAKQYGYPWWPGMVEPDPDLGEYFLFASHLDSLPSKYHVTFFGETVSRAWIPVNMLKNFQELTLELSG…
Bos indicus	Placental	MMPTLESKEKCGKGPKNTFAPPAQKLHSLMSYNLNSSKEEILEISSPQAEVRPSLLKAGLEKKKKKKKTTTENGPGNGQEIQGKAQDSKNAKKEKEKSTLTNAEFEEIVQIVLQKSFQECLETSCTQPTRCTQLDKEPGIASSNTSDNNNADGDRVVVPPILEISASQEDGIIPEIKISKPGQPDSASSEKKFNKLSLSKRKKEAQDEKMEKDQSGHEHRQDDQHKKTIQXHSQNRDQQKGEGSGFGQCLVWVQCSSPNCEKWRRLXGNIDPSVLPDNWSCDQNTDLQYNRCDIPEETWTGHESDVAYASYIPGSIIWAKQYGYPWWPGMVEPDPDLGEYFLFASHLDSLPSKYHVTFFGETVSRAWIPVNMLKNFQELTLELSGVRKCKNKDCSQKLL…
Bos taurus	Placental	MMPTLESKEKCGKGPKYTFAPPAQKLHSLMSYNLNSSKEEILEISSPQAEVRPSLLKAGLEKKKKKKKTTTENGPGNGQEIQGKAQDSKNAKKEKEKSTLTNAEFEEIVQIVLQKSFQECLETSCTQPTRCTQLDKEPGIASSNTSDNNNADGDRVVVPPILEISASQEDGIIPEIKISKPGQPDSASSEKKFNKLSLSKRKKEAQDEKMEKDQSGHEHRQDDQHKKTIQDHSQNRDQQKGEGSGFGQCLVWVQCSSPNCEKWRRLRGNIDPSVLPDNWSCDQNTDLQYNRCDIPEETWTGHESDVAYASYIPGSIIWAKQYGYPWWPGMVEPDPDLGEYFLFASHLDSLPSKYHVTFFGETVSRAWIPVNMLKNFQELTLELSGVRKCKNKDCSQKLL…
Bubalus bubalis	Placental	MMPTLESKEKCGKGPKNTFAPPAQKLHSLMSYNLNSSKEEILEISSPQAEVRPSLLKAGLEKKKKKTTTENGPGNGQEIQGKAQDSKNAKKEKEKSTLTNAEFEEIVQIVLQKSFQECLGMAFSERXEMESSLDFSETSCTQPTRCTQLDKEPGIASSNTSDNNNADGVVVPPILEISASQEDGIIPEIKISKPGQPDSASSEKKFNKLSLSKKKKEAHEKMEKDQSGHEHRQDDQQKKTIQDHSQNRDQQKGEGNGFGQCLVWVQCSSPNCEKWRRLRGNIDPSVLPDNWSCDQNTDLQYNRCDIPEETWTGHESDVAYASYIPGSIIWAKQYGYPWWPGMVEPDPDLGEYFLFASHLDSLPSKYHVTFFGETVSRAWIPVNMLKNFQELTLELSGRK…
Callithrix jacchus	Placental	MFHKFHLITFLSECGKGPKRIFAPPAQKSYNLIPFSPNSPKEETLGISSPETEARISLPKPRLKKEEKATTNNASSRGQEKKRKAQNNKQAEKKEKEKSSLTNAEFEEIVQIVLQKSLQEHLGMGSGLDFAETSCAQPIVSTQSDKEPGITASATDTDNADGEEVPHTQEISVSWEGEGVPEIRTSKLGQSDPAPSEKKSSRLSLSKRKKEAGDEKVEKTQSEHELRQKDQLKKTVQDHSQIRDQQKGERSGFDQCLVWVQCSFPNCGKWRRLCGNVDPSVLPDNWSCDQNTDKEYNRCDIPEETWTGLESDVAYASYVPGSIIWAKQYGYPWWPGMIESDPDLGEYFLFTSHLDSLPSKYHVTFFGETVSRAWIPVNMLKNFQELSLEPSGMKKHRNK…
Camelus bactrianus	Placental	MMTTLQSKEEGGKGPKKTFAPPAQKLHSLMPCSLNSSKEEILGISSPEAEARPSLLQARLEKKEEKATTENGPGGGQKIKRKAQNEKKAEKKEKEKSSLTDAEFEEIVQIVLRKSLQECLETSCAQPTRCTQLDKEPGISSVTDNDSADGERVVVPHILEISASKEGGVIPEIKTSKPGHPDPASSEKKFGRFSLSKRKKEAQYEKMEEAQSGHEHRQKDQLKKIVQGHSQIRDQQKREGGGFGQCLVWVQCSSPNCEKWRRLRGNIDPSVLPDNWSCDQNTDLEYNRCDIPEETWIGRESDVAYASYIPGSIIWAKQYGYPWWPGMVESDPDLGEYFLFASHLDSLPSKYHVTFFGETVSRAWIPVNMLKNFQELSLELAGLKKCRNKDCSQKLGAAL…
Camelus dromedarius	Placental	MMTTLQSKEEGGKGPKKTFAPPAQKLHSLMPCSLNSSKEEILGISSPEAEARPSLLQARLEKKEEKATTENGPGGGQEIKRKAQNEKKAEKKEKEKSSLTDAEFEEIVQIVLRKSLQECLETSCAQPTRCTQLDKEPGISSVTDNDSADGERVVVPHILEISASKEGGVIPEIKTSKPGHPDPASSEKKFGRFSLSKRKKEAQYEKMEEAQSGHEHRQKDQLKKIVQGHSQIRDQQKREGSGFGQCLVWVQCSSPNCEKWRRLRGNIDPSVLPDNWSCDQNTDLEYNRCDIPEETWIGRESDVAYASYIPGSIIWAKQYGYPWWPGMVESDPDLGEYFLFASHLDSLPSKYHVTFFGETVSRAWIPVNMLKNFQELSLELAGLKKCRNKDCSQKLGAAL…
Camelus ferus	Placental	MMTTLQSKEEGGKGPKKTFAPPAQKLHSLMPCSLNSSKEEILGISSPEAEARPSLLQARLEKKEEKATTENGPGGGQKIKRKAQNEKKAEKKEKEKSSLTDAEFEEIVQIVLRKSLQECLETSCAQPTRCTQLDKEPGISSVTDNDSADGERVVVPHILEISASKEGGVIPEIKTSKPGHPDPASSEKKFGRFSLSKRKKEAQYEKMEEAQSGHEHRQKDQLKKIVQGHSQIRDQQKREGGGFGQCLVWVQCSSPNCEKWRRLRGNIDPSVLPDNWSCDQNTDLEYNRCDIPEETWIGRESDVAYASYIPGSIIWAKQYGYPWWPGMVESDPDLGEYFLFASHLDSLPSKYHVTFFGETVSRAWIPVNMLKNFQELSLELAGLKKCRNKDCSQKLGAAL…
Canis lupus	Placental	MMAMLQSKEECGKGPKKTCTPSAQKLYSMMCYSPNSSKEESLGVSSPKARLKKKEEKTTTENGSSSGQENKGKPQDKQAEKEKEKSSLTNAEFEEIIQIVLRKSLQECLETSCAQPIRCTLLDKEPGIAASTDNDNADGERVMVPHILEISATQEAGVTSVIKTSKPGQPDPAPSEKKSNRPFLSKGKKGAQDEKMEKTQSGHEHRQKDQLKKTVQVDSQIRNQQRGKGGDFGQCLVWVQCSSPNCEKWRRLCGNIDPSVLPDDWSCDQNTDLKYNHCDIPEESWTGRESDVAYASYIPGSIIWAKQYGYPWWPGMVESDPDLGEYFLFASHLDSLPRVKARRRTRGHFLFQSKYHVTFFGETVSRAWIPVNMLKNFQELSLELAGVKKCRNKDCNQKL…
Capra hircus	Placental	MMPTLESKEKCGKGPKNTFAPPAQKLHSLMPYNLNSSKEEIPEISSPQAEVRPSLLKAGLEKKKEKTTTENGPGSGQEVQGKAQDSKNTKKEKEKSTLTDAEFEEIVQIVLRKSFQECLETSCTQPTRCTQLDKEPGIASSNTSDNNNADGDRVVVPPILEISASQEDGIIPEIKISKPGQPDSASSEKKFNKLSLSKRKKEPQDEKMEKDQSEHEYRQDDQHKKTIQDHSQDGDQQKGEGNGFGQCLVWVQCSSPHCEKWRRLRGNIDPSVLPDNWSCDQNTDLQYNRCDIPEETWTGHESDVAYASYIPGSIIWAKQYGYPWWPGMVEPDPDLGEYFLFASHLDSLPSKYHVTFFGETVSRAWIPVNMLKNFQELTLELSGVRKCKNKDCSQKLGVA…
Carlito syrichta	Placental	MTTLQNKEECGKEPKKIFAPPAQKLSSLIPCSLNSCDKTMGISSPETEAKASLPKARLEKRKEKAAAENGLSSGQEEEGKAQDNQQAEKKEKEKSSLTSAEFEEIVQIVLQKSLQECLGMGFGLDFTETSIAQPIICTQSDKEPGIISSASYNANGVMVPQIPKISASWEDEVVPELRTSKIGQPDPARSKKKFSRLSLSKRKKDAHEKMEKVQGGHEQRQKDRLKKMIQDHSQIKDHQKGEESGFGQCLIWVQCSSPNCEKWRQLRGNIDPSILPDNWSCDQNTDLEYNRCDIPEETWTGLESDVAYASYIPGSIIWAKQYGYPWWPGMVESDPDLGEYFLFTSHLDSLPSKYHVTFFGETVSRAWIPVNMLKNFQELSLELAGVKKCRNKDCSQKLG…
Castor canadensis	Placental	MMTTLQNKEECGKGPKKTFAPPIQKLHSMIRHAPDSPKEVTPGVNSPQAETRPNLPKARIEQKVTRENGPSSGQETKGKAQDNKPAGKKVKEKSSLTNAEFEEIVQIVLQKSLQECLGIGSGLNFAEVSCAQCIVCTQLNKQRGIASSATKNMDGVMVSHAPETSAAVEDEVVPEIRTSKPSQPIPAPSEKKLTKLPLSKRKKRAQDEKIGKIQGGHEHRQKDQLKQMIQNHFYIRDQKKGEESGFGQFLVWVQCSFSNCEKWRRLPGNIDPSVLPDNWSCDQNPDLNYNRCDIPEEAWTGRESDVIYASYIPGSIIWAKQYGYPWXGATDRASFLNLAGHLXLQSKYHVTFFGETVSRAWIPVNMLKNFQELSQELAGVKKCRNKDYSQKLGAAIVMA…
Cavia porcellus	Placental	MMATLQKKEECGKGPKKAFAPPTQKLHSMIPSSPDSPKETLGIGSSKAEAKPRQPKARLEKKEKAVSENGPRLGREKKGKAQDRKPIEKNGKEKLILTNAEFEEIVQTVLRKSLKECLGMGSGLNFTESSCVKTTVCIQSDKEPEIVASDTDNDNASGEKIMVPHTSEISASLEGEVTPEIRASEPGQAIPKVSEKKLNRLDLSKRKKEAQDEKMETPQGRRKHRQRDRLGYRIQNHSQSRNQQKRKGNGFGHCIVWVQCSSPNCRKWRQLCGNIDPSVLPDNWSCNQNTDLEYNCCDIPEVAWTGNESEVVYASYVPGSLIWAKQYGYPWWPGMVESDPDLGEYFLFASHLDSLPTKYHVTFFGETVSRAWIPANMLKNFQELSLEQTGVKKCRNKDY…
Cebus capucinus	Placental	MMTTLQNKEECGKGPKRIFAPPAQKSYNLIPFSPNSPKKETLGISSPETEARISLPKARLKKEEKATTNNASSRGQEKKRKAQNNKQAEKKEKEKSSLTNAEFEEIVQIVLQKSLQERLGTGSGLDFAETSCAQPIVSTQSDEEPGITASATDTDNADGEEVPHTQEISVSWEGEAVPEIRTSKLGQSDPAPSEKKSSRLSLSKRKKEAGDEKVEKTQSGHELRQKDQLEKTVQDHSQIRDQQKGEISGFDQCLVWVQCSFPNCGKWRRLCGNVDPSVLPDNWSCDQNTDMEYNRCDIPEETWTGLESDVAYASYVPGSIIWAKQYGYPWWPGMIESDPDLGEYFLFTSHLDSLPSKYHVTFFGETVSRAWIPVNMLKNFQELSLEPSGMVNTRNACIR…
Ceratotherium simum	Placental	MMTTLQSKEYGKGPKKTFAPPAQKLHSLMPCSSNSPKEETLGISTSETEDKPSLPKARLKKKEKKATTENNPSSGQEKKGKAQDNKQAEKKEKEKSSLTNAEFEEIIQIVLQKSLQECLGMGSSLDFPEISCAQPIRCTQLDKEPGIASSTTDNDNADGDMVMVPRILEISASQEDGIIPEIKTSKPGQPDPAPSEKKFNRLSSSKRKKEAHEKMEKAQSGHDHRQKDQLKKAVQDNSQIRDQQKGEGSGFGQCLVWVQCSSPNCEKWRRLRGNIDPSVLPDSWSCDQNTDLEYNRCDVAEETWTGHESDVAYASYIPGSIIWAKQYGYPWWPGMIESDPDLGEYFLFASHLDSLPSKYHVTFFGETVSRAWIPVNMLKNFQELSLELTGVKKYRNKDC…
Cercocebus atys	Placental	MMTTLQNKEECGKGPKRIFAPPAQKSYSLLPCSPNSPKEETLGISSPETEASISLPKASLKKEEEKATTKNGPSRGQEKKRKAQNNKQAEKKEKEKSSLTPAEFEEIVQIVLQKSLQECLGMGSGLDFAETSCAQPIVSNQSAKEPGITASATDTDNANGEEVPHTQEISVSWEGEAAPEIRTSKLGQPDPVPSKKKSNRLTLSKRKKEAQDEKVEKTQGGHEHRQEDQLKETVQDHSQIRDLQKGEISGFGQCLVWVQCSFPNCGKWRRLCGNIDPSVLPDNWSCDQNTDVQYNRCDIPEETWTGLESDVAYASYIPGSIIWAKQYGYPWWPGMIESDPDLGEYFLFTSHLDSLPSKYHVTFFGETVSRAWIPVNMLKNFQELSLELSGMKKRRNDCS…
Chelonia mydas	Turtle	MKKTFAPPLAKPHVLSLREGPEHHGRKKDTRAKEAMTYLLSQGTSDSTETQLKAGHPDTDVKRWKKSRVAKEEDMGHVKGPETAQDVEKRAKRNSSRASAKEMCHLTDLQFEEIVQCVLQKSLQECMEESKRTFHQAEATEVAEQQGLKKETLETSLPAGNLVQHSDEPKGTVSAMDLKESLPKAKKRNKLSLNKMRKEMPDESTEANKERRKRQRKGEPKKIVQGYTLIADQEETEEGGESTFNQCVAWVQCSYPSCEKWRRLSSDIDPSVLPEDWTCSQNTDLQYNSCDVPEETWSGSENEVVYATYVPGSIIWAKQFGYPWWPAMVECDPDIGEYFLFSSRLDSLPSKYHVTFFGEAVCRAWISATMLRNFHEFSRESLGL
Chinchilla lanigera	Placental	MATLQKEECGKGPKKTFAPPTQKLHSMLPCPPDLPKEALGIGSPEAEAKPSQPKLEKKKAATEKGPSLGREKKRKAQDSKPGEKNGKEKIILTNAEFEEIVQTVLRKSLQECLGMGSGLDFAETSCVKPTVCIQSDKEPGIVASATDNDNANGEKVMVPHAPEISAFLQDAVTPEMRASEPGQAIAAPSEKKLRRLYLSKRKKEAQDEKMETPQHGHEHGQTNRREDVIQNRKRKSNGFSHCIVWVQCSSPNCRKWRRLCRNIDPSVLPDNWFCYQNTDVDYNCCDIPEEAWTGNESEVVYASYIPGSIIWAKQYGYPWWPGMVEADPDLEEYFLFASHFDSLPSKYHVTFFGETVSRAWIPANMLKNFQELSLEQTGVKKCRNKDYIQKLEVAVTMAY…
Chlorocebus sabaeus	Placental	MCFKNNQALRLPPKKICDTKRILGFVVFPGRSGERWRNYLSRGNADAVSSCACASDSASAPPGGGASAQGVLVPFLGGGKPGSRCEGLAESLRQLVLHLAFRSSLLLKLSVFVIVKEVNSPETEEGQPELSESDFLAFPSLLISPNSPKEETLGISSPETEASISLPKTSLKKEEEKAATKNGPSRGQEKKRKAQNNKQAEKKEKEKSSLTPAEFEEIVQIVLQKSLQECLGMGSGLDFAETSCAQPIVSTQSAKEPGITASATDTDNANGEEVPHTQEISVSWEGEAAPKIRTSKLGQPDPVPSKKKSSRLTLSKRKKEAHEKVEKTQGGHEHRQEDQLKETVQDHSQIRDLQKGEISGFGQCLVWVQCSFPNCGKWRRLCGNIDPSVLPDNWSCDQN…
Chrysemys picta	Turtle	MMKKTFAPPVAKPHVLSLREGPEHHGKEEDARAKEAITYLLSQGSSDSIKTKLKEGHPDTDVQRWKKSRVAKEEDTGHVKDPATPRDVEKRPKRNSNNASAKEMCHLTDLQFEEIVQSVLQKSLQECMEESKRTFHQAEATEAAEPQGLKKETFETSRPAGNLVQHSDEPKGTASAVDIKEPLPKAKKRNKLSLNKMRKKLPDESTEANKERHKRHRKGEPKKIVQGYTLIADQEETEEGGESTFNQCVAWVQCSYPSCEKWRRLSSDTDPSVLPEDWTCSQNTDLQYKSCDVPEEMWLGSENEVVYATYVPGSIIWAKQFGYPWWPAMVECDPDIGEYFLFSSRLDSLPSKYHVTFFGESVSRAWISAPMLRNFHAFSTESLGLKTLRSKDSRQKLDS…
Chrysochloris asiatica	Placental	MMTTLQKKGECGKGPKKTFAPPAQKLQRLMPSSPNSLKENILGISFPEVETKSSLPKSKLVKKNEKAPTENVQGRGQEKKRKNQYKKAEKKAEKEGASLTNAEFEEIVQIVLQKSLQECLGMAXSGLGFAEISCAQPIACSQSDKEPGTSSVTTDNGNADGLIVHHTPESSASQQNGVVLEINAAQLVQPDPAPPEKKLSRLSLNKRKKGENEKPEKFQVGHENKQKDQSKKTGQDHSQIKDQQKEKGGFGQCLVWVQCSFPNCEKWRRLRGNIDPSVLPDNWSCDQNTDLEHNRCDIPEEIWTGHENDVAYASYIPGSIIWAKQYGYPWWPGMVESDPDLGEYFLFASHLDSLPSKYHVTFFGETVSRAWIPVNMLKNFQELSLELAGVKKCKNKDCI…
Colobus angolensis	Placental	MMTTLQNKEECGKGPKRIFAPPAQKSYSLLPCSPNSPKEETLGISSPETEASISLPKASLKKEEEKATTKNGPSRGQEKKRKAQNNKQAEKKEKEKSSLTPAEFEEIVQIVLQKSLQECLGMGSGLDFAETSCAQPIVSTQSAKEPGITASATDTDNANGEEVPHTQEISVSWEGEAAPEIRTSKLGQPDPVPSKKKSNRLTLSKRKKEAQDEKVEKTQGGHEHRQEDQLKETVQAHSQIRDLQKGEISGFGQCLVWVQCSFPNCGKWRRLCGNIDPSVLPDNWSCDQNTDVQYNRCDIPEETWTGLESDVAYASYIPGSIIWAKQYGYPWWPGVIECDPDLGEYFLFTSHLDSVPSKYHVTFFGETVSRAWIPVNMLKNFQEMSLELSGMKKRRNDCS…
Condylura cristata	Placental	MMTTLQSKEECGKAPKKTFAPPGQKLCNLIPYSSNSPKEGTLGINFPEADTKPNLPKASLEKKENATTKNGPSSGQEKKGKTQDSKQVKKKEKEKSSLTNAEFEEIVQIVLRKSLQECLEMRASLYFAETSCAQPIVYAHVDKEPKIAASTDNDNADGVGLKVPHILEISVSQEDGIIPKIKTSTAGQPDPVPSEKRFSRPSLSKRKKETQNEKVEKAQSGHEQKQNDPLETTNQGHCQIRSQQNGEGCGFGQCLVWVQCSFPNCEKWRRLRGNIDPSVLPDNWSCDQNTDLEHNRCDIPEEIWTGRESDVAYASYIPGSIIWAKQYGYPWWPGMVESDPDLGEYFLFSSHLDSLPSKYHVTFFGETVSRAWIPVNMLKNFQELSLELAGVKKCRNKDC…
Cricetulus griseus	Placental	MMATSQNIKEYEKGTKKTFASPTQKSHHVKPQADSWKEDPQGTSSLEAEAKPRRPRASPKKEQKTATEHGPNGGQEKKRKAQDKPAKKKGKEKQTLTNAEFEEIFQIVLRKSLQEYLGLGSGLNFAETSCVQPIIPTKSDKEPGIASPATDNENADGINSREEVIVPDTREIASSLEEEVDSEIRTSKPGQLAAEPSKKKSNRLSLSKRRKKSEDEKMEEIQDGYECILKDKQKTTIQDPSQIRGQQKEEEGGFGQCLIWVQCSSSKCEKWRQLRGDIDPSVLPDNWSCDQNPDLNYNRCDIPEETWTGCESDVAYASYVPGSIVWAKQYGYPWWPGMIETDPDLGEYFLFSSHLDSLPSKYHVTYFGERVSRAWIPVSMLKNFQELSLELVRGKTCRN…
Dasypus novemcinctus	Placental	MTTLQNKEECGKGPKKTFAPPTQKLHSLMPFNPNSPKEETQGFSYPVAGARPSPPNARLEKKKEKVNTENGPGGSQEKKGMDQDNKQAEKKANKEKASLTNAEFEEIVQIVLRKSLQECLENSCTQPIGCIQSDREPGIASTTTSENSNADGERLMVPHTPEISAPQEDRVVLEINTSEPGLPDPAPTEKKVNRFSLNKRKKESQDEKMEKVQGRPEHKQKDQPKKTIQDHSQTSDKQKGESSGFGQCLVWVQCSSPNCEKWRRLRGNIDPSVLPDNWSCDQNTDLEYNRCDIPEETWTGRESDVAYASYIPGSIIWAKQYGYPWWPGMVESDPDLGEYFLFASHLDSLPSKYHVTFFGETVSRAWIPVNMLKNFQELSLELARAKRCRNKDCSQKLGA…
Delphinapterus leucas	Placental	MMTTLQSKEEFGKGPKKTFAPPAQKLHSLMPYNLNSSKEEILGISSPEAETRPSLLKARLEKKKQKTTKENGTGSGQELKGKAQDNKKAEKKEKGKSTLTNAEFEELVQIVLQKSLQECLETSCAQPTRCTQLDKEPGIASSTTDNNNADGERVVVPHILEISASHEGGVIPDIKTSKPGQPDPAPSEKKFNKLSLSKRKKAAQNEKMEKAQSGHEHRQKDQLKKTVQDHSQIRDQQKGEGSGFGQCLVWVQCSSPNCEKWRRLRGNIDPSVLPDNWSCDQNTDLEYNHCDIPEETWTGHENEVAYASYIPGSIIWAKQYGYPWWPGMVESDPDLGEYFLFASHLDSLPSKYHVTFFGETVSRAWIPVNMLKNFQELSLELAAVKKCRNKDFSQKLGAA…
Echinops telfairi	Placental	MTTLQNKEEHGKGPMKSFAPPAKKLRRLTLTNPNSLKEDTLGITSSEGETKPSMPKARFKKKEKPPTELGQGSGQKKKGKNPLNKQAEKEAEKERTSLTNEEYEEIFQIVLQKSREECLETSCAQPIGGTQTDKELGIASNTANIDNLDGRRLIVPYTPENPTSQENGVVSEINANKPGQPHPVSSEKKCNKLCLNKRKKNAQNGKLEISQGGHEHRQEDQPKNSGQDHAQITEQLEGDKGGFGQYLVWVQCSSPNCEKWRRLCRNMDPSILPSNWSCDQNTDLEYNRCDIPEETWTGHESDVAYASYIPGSIIWAKQYGYPWWPGMVEPDPDLGEYFLFASHLDCLPSKYHVTFFGEAVSRAWIPVNMLKNFQELSLDLAGAKKFRNKDYIQKLGPAV…
Elephantulus edwardii	Placental	MTTLQNKECGKRPKRRFAPPTQKVHGLMPASPNSLKEDPLENTSPERENMPSLSKAKLEKNEKATTENGPVGGQNKKGKNLHKHSEKKAEKERTSLSNAEFEEIVQTVLRKSIEECLETSCAQRVGCIQTAKGPGIASITADNDNTDGDELTVPHTPASQQNEVVPKVNESKPDQLDPAFSEKKFKRLSLNKRKKGAQNEELEHEQEEQTKNIIPNCPQIKEPQKGESGGFGHCLVWVQCSSPNCEKWRQLRGNIDPSILPENWSCDQNTDVEYNRCDIPEETWIGPESDVAYASYIPGSIIWAKQYGYPWWPGMVESDPDLGEYFLFASHLDSLPSKYHITFFGDTVSRAWIPVNMLKNFQELSLELAGVKKFKNKDFSQKLKAALLMAQAAEQISIQ…
Enhydra lutris	Placental	MCYSPKPPKEDTVRISSPKARLEKKEAKATTENGPSSGQENKGKPQDKQVKKKEKERSSLTSAEFEEIVQIVLRKSLEECLEMGSSLDFTETSCAQPLRCTQLDKEPGIASSTDNDNADGVMVPHILEISATKEAGVSSVIKTSKPGQPDPAPSEKKFNRPSLSKGKKGAQDDKMEKVQSTYKQRQKDQLKKTVQDDSQTRNQQKGEGSGFGQCLVWVQCSFPNCEKWRRLCGNIDPSVLPDNWSCDQNTDSRYNRCDIPEESWTGRESDVAYASYIPGSIIWAKQYGYPWWPGMVESDPDLGEYFLFASHLDSLPSKYHVTFFGETVSRAWIPVNMLKNFQELSLELAGMKKCRNKDCNQKLGAALSMAQEAEQISIQERVNLFGFRSRYNGSDSSGE…
Eptesicus fuscus	Placental	MMTTSQSKEEYGKGSKKPFIPPAQKLHSLMPYSPNSHKEETMEISSLEAEAGPNLAEAGPNLRKAKLEKKEEEATTVNGPCSDQEKKVKVQDNKQAEKKAKEKSNLTNEEFEEIVQIVIQKSLQECLGMAYETSCAQPIRRTQLDKEPGISSTTDNDNADREWVTVPHILEISASQEDGIIPEIKISKPGQPGPASSEKKFSKLSIRRRKKKAHEKIKKAQRGHEHKQKDQPMKMVQGHAQMRDQQKGEESGFGQCLVWVQCSSPNCEKWRRLRGNIDPSVLPDNWSCVQNTDLEYNRCDIPEETWIGHESDVAYASYIPGSIIWAKQYGYPWWPGMVESDPDLGEYFLFASHLDSLPSKYHVTFFGETVSRAWIPVNMLKNFQELSLELSGVKKCRNK…
Equus asinus	Placental	MMTTVQGKECGKGPKKTFAPPAQKLQSLMPCSSDSPKEETLGISSLEAEARPDLPKARSKKKEKKATTENGPSSGQGEKRKSQDNRQAEKKDKEKSSLTNAEFEEIIQIVLRKSLQECLGMESSLDFTETSCAQSIRCTQLDKEPGIAVSTTDNDNADGEMVMVPHILEISASQEDEIIPEIKTSEPFQPDPAPSERKFNRLSLSKRKKEAHGKVEKAQSGHEHRQKDQLKKAVQDYSQIRDPQKGEGSGFDQCLVWVQCSSPNCEKWRRLRGNIDPSVLPDNWSCDQNTDLEYNRCDIPEETWTGRESDVAYASYIPGSIIWAKQYGYPWWPGMIESDPDLGEYFLFASHLDSLPSKYHVTFFGETVSRAWIPVNMLKNFQELSLELTGVKKYRNKDC…
Equus caballus	Placental	MMTTVQGKECGKGPKKTFAPPAQKLQSLMLCSSDSPKEETLGISSPEAEARPDLPKARSRKKEKKATTENGPSSGQGEKRKSQDNRQAEKKDKEKSSLTNAEFEEIIQIVLRKSLQECLGMGSSLDFTETSCAQSIRCTQLDKEPGIAVSTTDNDNADGEMVMVPHILEISASQEDGIIPEIKTSEPFQPDPAPSERKFNRLSLSKRKKEAQDGKMEKAQSGHEHRQKDQLKKAVQDYSQIRDPQKGEGSGFDQCLVWVQCSSPNCEKWRRLRGNIDPSVLPDNWSCDQNTDLEYNRCDIPEETWTGRESDVAYASYIPGSIIWAKQYGYPWWPGMIESDPDLGEYFLFASHLDSLPSKYHVTFFGETVSRAWIPVNMLKNFQELSLELTGVKKYRNKD…
Equus przewalskii	Placental	MMTTVQGKECGKGPKKTFAPPAQKLQSLMLCSSDSPKEETLGISSPEAEARPDLPKARSRKKEKKATTENGPSSGQGEKRKSQDNRQAEKKDKEKSSLTNAEFEEIIQIVLRKSLQECLGMGSSLDFTETSCAQSIRCTQLDKEPGIAVSTTDNDNADGEMVMVPHILEISASQEDGIIPEIKTSEPFQPDPAPSERKFNRLSLSKRKKEAHGKMEKAQSGHEHRQKDQLKKAVQDYSQIRDPQKGEGSGFDQCLVWVQCSSPNCEKWRRLRGNIDPSVLPDNWSCDQNTDLEYNRCDIPEETWTGRESDVAYASYIPGSIIWAKQYGYPWWPGMIESDPDLGEYFLFASHLDSLPSKYHVTFFGETVSRAWIPVNMLKNFQELSLELTGVKKYRNKDC…
Erinaceus europaeus	Placental	MAASQNKEECEKGLKKIFAPPAQKLLGLVACSSNSSQEEVPRISSPEAEPRPNLTKAQLEKKEKAAAETGLGSGRGKKGKTQNPKKTEKKGKEKSSITNEEFEEIVQIVLQKSFQNCLDTTYAQSMGCSKLHKEPEIVSSATGNNSADGERVMITHILEISASQEDRLPEIKTSVTDQPAPVPAVKKISKLSSNKRKKETQNENVEKTQSGPEHRQKDQPKKTAQDPSQSRNHQEEEESGFGQCQVWVQCSSPNCEKWRRLQGNIDPSVLPDNWSCEQNTDLAYNRCDIPEETWTGHESDVAYASYIPGSIVWAKQHGYPWWPGMVESDPDLGEYFLFASHLDSLPSKYHVTFFGETVSRAWIPVNMMKNFQELSLELSGVKKCRNKDYIQKLKVALMM…
Felis catus	Placental	MMATLQSKEEHGKGSKKTFAPPVQKMHSLMCYSPNSPKEETLGISSSKDRLEKKEQKATTENGPSSGQEKKGKAKDKQAEKKAKEKLSLTNAEFEEIVQIVLRKSLQECLETSCAQPIRRTQLDKEPGIASSTDNDNADGEKVMVPHTLEISATKEAGVTSVIETPKPGQPDPPPSEKKFNRFSLSKGKKGAQDEKMEKAQSGREPRQKAQLKKTVQNHSQIRNQQKGEGSGFGQCLVWVQCSSPNCEKWRRLCGNIDPSVLPDNWSCDQNTDLKYNRCDIPEESWIGHESDVAYASYIPGSIIWAKQYGYPWWPGMVESDPDLGEYFLFASHLDSLPSKYHVTFFGETVSRAWIPVNMLKNFQELSLELAGVEKLCWEKVPCLTKCARVRLFMRDSSF…
Fukomys damarensis	Placental	MMATLQKKEECGKGLKKTFAPPTQKLHSMIPCGPDLPMETLGISSPEAEVKPSLPKARLEKKKEEEEEEEEAATEHGPSLGQDKKRKARDNKPAEKNEKEKLILTNAEFEEIVQTVLRKSLKECLGMGSGLNFAETSCVKPTMCIQSDKETEIAASATDDDIASGESVMVPQVPEISASLKDEVTPDKGASEPGLAILASSEKKHNRLYLNKRKKQAQDEKMETTQSGSEYRQTDQLNNMIQNRSQTQTRVQKKRKGSGFGHCIVWVQCSFPNCKKWRQLCRNTDPSVLPDNWFCHQNTDVNYNCCDIPEEAWTGPESEVVYACYVPGSIVWAKQYGYPWWPGMIESDPDLGEYFLFASHLHSVPSKYHVTFFGEAVSRAWIPVNMLKNFQELCLEQTG…
Galeopterus variegatus	Placental	MMTTLQNKECGNGPKKTFAPPAQKLYCLIPCSSNSPKKETLGIGSSQAEKSSLTNEEFEEIVQIVLRKSLQECVACTQSDKEPGIAPFATDNDTDGERIVVPHTQGISASREDEIVPEIKTCKLSQPDPAPSEKKFNRLSLSKRKKEARDEKVEKVQGGHEHRQKDQPKKMVQDHSQFRGQQKEGRNGFDQCLVWVQCSFPNCEKWRRLRGNIDPSVLPDNWSCDQNTDLEYNHCDIPEETWTGCENDVAYASYVPGSIIWAKQYGYPWWPGMIESDPDLGEYFLFASHLDSLPSKYHVTFFGETVSRAWIPVNMLKNFQELSLEQAGVKKGRKKDCSQKLGAALMMAQEAEQISIQERVNVFGFQSRYNGSDSGEERDVMLSGANSPDSCLEEEEEEE…
Gorilla gorilla	Placental	MMTTLQNKEECGKGPKRIFAPPAQKSYSLLPCSPNSPKEETPGISSPETEARISLPKASLKKKEEKATMKNVPSREQEKKRKAQINKQAEKKEKEKSSLTNAEFEEIVQIVLQKSLQECLGMGSGLDFAETSCAQPVVSTQSDKEPGITASATDTDNANGEEVPHTQEISVSWEGEAAPEIRTSKLGQPDPAPSKKKSNRLTLNKRKKEAQDEKVEKTQGGHEHRQEDQLKKTVQDHSQIRDQQKGEINGFGQCLVWVQCSFPNCGKWRRLCGNIDPSVLPDNWSCDQNTADVQYNRCDIPEETWTGLESDVAYASYIPGSIIWAKQYGYPWWPGMIESDPDLGEYFLFTSHLDSLPSKYHVTFFGETVSRAWIPVNMLKNFQELSLELSVMKKRRNDC…
Heterocephalus glaber	Placental	MMATLQKKEECGKGPKKTFAPPTQKLHSMIPCSPDSPKETLEIGSPEAEVKPNQPKPRLGKREKKAAIENGPSLGRKKRKAQDNKSAEKNEKEKLILTNAEFEEIVQIVLRKSLKECLGMGSGLNFAETSCVNPTVCIHSDKEVGIAASAATDNDNASGERVMVPQVPEISASLEDEVTPEIRPSEPGQAILAPSEKKLNRLYLSKRKKEARPCIVWVQCSSPNCKKWRQLCKNMDPSVLPDNWFCHQNTDLNYNCCDIPEETWTGRESEVVYASYVPGSIVWAKQYGYPWWPGMIESDPDLGEYFLFASHLDSMPSKYHVTFFGKTVSRAWIPVNMLKNFQELFLEQTGVKKCRNKDYIQKLEVAIIMAHKAQQTGIQDRVNLFGFWSRYCGSDSNEE…
Hipposideros armiger	Placental	MMTTLQSKEEYGKGPKKTFAPPAQKLHSLMSYSPNSPKEETLGISSPVVQARPNLLKARLEKKKKKAKATTKNGPSSGQEKKVKAQDNKQAEKKKKEKSSLTNAEFEEIFQLVLQKSFQQSLGMESSLDFTETSCAQPLRCTQLDKEPGIASTTDNDNADGERVMVPHILEISASQEDGVIPEIKTSQPGQPAPAPPKKKFNRLSLSKRKKEAQDEKMKKAQSGHEHRQKDQSKKMVQVHSQIMDQQKEEESGFGQCLVWVQCSFPNCEKWRRLHGNIDPAILPNNWSCEQNTDLEYNRCDIPEESWTGCESDVAYASYIPGSIIWAKQYGYPWWPGMVESDPDLGEYFLFASHLDSLPSKYHVTFFGKTASRAWIPVNMLKNFKDLSLELAGVGKVCW…
Homo sapiens	Placental	MMTTLQNKEECGKGPKRIFAPPAQKSYSLLPCSPNSPKEETPGISSPETEARISLPKASLKKKEEKATMKNVPSREQEKKRKAQINKQAEKKEKEKSSLTNAEFEEIVQIVLQKSLQECLGMGSGLDFAETSCAQPVVSTQSDKEPGITASATDTDNANGEEVPHTQEISVSWEGEAAPEIRTSKLGQPDPAPSKKKSNRLTLSKRKKEAQDEKVEKTQGGHEHRQEDRLKKTVQDHSQIRDQQKGEISGFGQCLVWVQCSFPNCGKWRRLCGNIDPSVLPDNWSCDQNTADVQYNRCDIPEETWTGLESDVAYASYIPGSIIWAKQYGYPWWPGMIESDPDLGEYFLFTSHLDSLPSKYHVTFFGETVSRAWIPVNMLKNFQELSLELSVMKKRRNDC…
Ictalurus punctatus	Bony fish	MAHTDETVMKKTTEKNNRQMMDGEKDGEPKPDDVKSGKKMKRPRATHQKISESGNRSSGEMERMTEESRTGERRDGGRKTRQGKSRKEKGTDVSGDGGTPGEKRARTGSGDENRQEVKESQVMKKRQQNVRVWSVSYSSTVDVNGGDKKLGTHRRERDEVDKCSGLVQTLSTHSSDEDQYVSWVQCSKPECGKWRRLSDGVDPSVLPDDWSCKNSTDPAFSSCFAPEEKSSVPDEEMFFYNLVPGSLVWAQQSGYPWWPAIVEQDPNIEEYLEFRTESDLTPYRCHVTYFGEPVSRAWVICSRVRDFADLSEDQFLSEVDKGLKDAIYMAKEALKLSLKERLVKFGFHSRYVSDRESSEDIDIAEILELFCGEAGNDCSVEDSWGKKQRLKQKERKRDR…
Ictidomys tridecemlineatus	Placental	MMTTLQKKEECGKGSKKPFAPPTQKLHSMIPHGPNSHRDETLGISSPVAEAKASPPKARLEKEEKATTEDGPGVGQEKKGKAQDKPAEKKEKGKSSLTNAEFEEIVQIVLQKSLQECLGTACGMGSGLNFAETTCVQTNSQSDKEPGIASATDNDNAVGEWKMIPHTPETSASVEDVPEIRTSKSAQLVPAPSEKKFNRLSLSKRKREAQDEKMEKVQGGHECREKDHPEKIIQGDSQIRGQQKGEESGFGQCLVWVQCSSPNCEKWRRLRGNIDPSVLPDNWSCDQNTGGKNLDYNRCDIPEEIWTGRESDVAYASYVPGSIIWAKQYGYPWWPGMVESDPDLGEYFLFASHLDSLPSKYHVTFFGETVSRAWIPVNMLKNFQELSLELAGMKKCRNK…
Jaculus jaculus	Placental	MMAALQNNEEYEKVPKKTFAPPTQKWHSIMPPGPNSYKEDTLGISSPQAEANPNPPKASLKRKEQKAATQNGLSRGQEKKQKVQDKTPSEKHRKGKATLSNAEFEEIVQTVLQKTLQECLGMGTDLNFAETSYFQRIVCIQSDREPGIVASGSDNDNTDGERVMAPDNTEIPACLEDKVDLDIQTSELGQVAPALAKKKFNRPNLSKRKKEAQDESMEEMQDRHVLKQKDQQRTMTKDRSQIRGQQNKEESGFGQCIVWVQCSYPTCEKWRRLHRNIDPSVLPDNWSCDQNPDLDYNRCDIPEETWIGCESDVVYASYVPGSIIWAKQYGYPWWPGMVESDPDLGEYFLFASHLDSLPSKYHVTFFGETACRAWIPVNMLKNFQELSQELATMKKCKNK…
Latimeria chalumnae	Coelacanth	MAGLYSSMYRQRGSTVRGKPVGKKGSFVPPVLKAGTTGSERKNEDGPLEKPVPKKPKTGPEAEKRPEAPEAAAQEKTKVRKKKLGENPKKIKDGKVAGGGRHKESEKKGAEKALTVQDTEGELHGDGKQTKKVQLQARCPLSDSQYNELFQSVLQKTLEERMASRKATLGEESLSQNPAGTELTGLDSGLPQPSMDKVVNMQNAGVPVLAPRTTGTESEGKKINKLSLKKRKKEEKTTKVYKEEGRKHSRKGKPRKLNLSETGDQEDPSENETTISHGAAWVQCSRAQCGKWRRLRDSMDPSTLPEDWTCSQNADAEFRSCGAPEEAFSGSEDGIIYTELIPGSLVWARQYGYPWWPGMVEPDPNVGDYLLFTSQLHQMPAKYHITFLGDAVSRAWISA…
Lepisosteus oculatus	Bony fish	MDEGKEKLKMKKPKFAPPVALGGPGDGQGKGPQEERGAGVREREKAAGSRGRPGRKAGEESPGRGIGAGRSAGEESAEVLGEGPIPRTGKSRSAAAGGKRPEERSLRVPGLEGQARELLGPGRTGGERRRKGKAVGPGGGSGRGEGWEEKALRGEEEEGTARPGPAGIKESLAGCTGGKGWAGLQPGGKRAEAAEPSGRKKDRAGGQRGDRPLPGGTGSVLKEGAKEGDRPKSDKKKPKMKTGESDQEPEEKPRGLPVWRTTGEERAGTPKNSKDGASSVWEECCPSPFLSDSQYNAIFQAVLDKSLDKCLDDARTVLSEVELLQASIDEDSQRGQDKRPEYRDSDVRLAPGHKKRHAQQGNGQRRGELLHSQKKEQEEEEGGEDSDSSQEDWSSWVQC…
Lipotes vexillifer	Placental	MMTTLQSKEECRKGPKKTFAPPAQKLHSLMPYNLNSSKEEILGISSPEAETRPSLLKARLEKKKEKTTKENGTGSGQEIKGKAQDNKKAEKKEKGKSALTNAEFEEIVQIVLQKSLQECLETSCAQPTRCTQLDKEPGIASSTTDNNNADGERVVVPHILEISASQEGGVIPEIKTSNPGQPDPAPSEKKFNKLSLSKRKKAAQNEEMEEAQSGHEHRQKEQLKKTVQDHSQIRDQQKGEGSGFGQCLVWVQCSSPNCEKWRRLRGNIDPSVLPDNWSCDQNTDLEYNHCDIPEETWTGHESEVAYASYIPGSIIWAKQYGYPWWPGMVESDPDLGEYFLFASHLDSLPSKYHVTFFGEKVSRAWIPVNMLKNFQERSLELAGVKKCRNKDFSQKLGAA…
Loxodonta africana	Placental	MTTLQNKEECGKEPRKTFAPPTQKLCRLMPSSPNSLKVDTLRISSPEVESNPSLPKARLEKKNEKATTENGQGSDQEKKGKDQYNKQPKKKAEKERGSLTNAEFEEIVQIVLRKSLQECLGSGLGLAETACAQPIACTQSDKEPEIASVTVDNDNAEGERLIVPHTPEISASQENGVVREINASKPGQPDPPPSEKKFDKLSLNKRKKEARNEELEKFRGEHEHRQKDQPKKTVQNHSQIRDQQKREGGGFGQCLVWVQCSSPNCEKWRRLHRNIDPSALPDNWSCDQNTDLEYNSCDIPEETWTGHESDVAYASYIPGSIIWAKQYGYPWWPGMVESDPDLGEYFLFASHLDSLPSKYHVTFFGETVSRAWIPVNMLKNFQELSLELAGVKKCRNKDC…
Macaca fascicularis	Placental	MFHKFHVITFLSECGKGPKRIFAPPAQKSYSLLPCSPNSPKEETLGISSPETEASISLPKASLKKEEEKATTKNGPSRGQEKKRKAQNNKQAEKKEKEKSSLTPAEFEEIVQIVLQKSLQECLGMGSGLDFAETSCAQPIVSNQSAKEPGITASATDTDNANGEEVPHTQEISVSWEGEAAPEIRTSKLGQPDPVPSKKKSNRLTLSKRKKEAQDEKVEKTQSGHEHRQEDQLKETVQDHSQITDLQKGEISGFGQCLVWVQCSFPNCGKWRRLCGNIDPSVLPDNWSCDQNTADVQYNRCDIPEETWTGLESDVAYASYIPGSIIWAKQYGYPWWPGMIESDPDLGEYFLFTSHLDSLPSKYHVTFFGETVSRAWIPVNMLKNFQELSLELSGMKKRR…
Macaca mulatta	Placental	MFHKFHVITFLSECGKGPKRIFAPPAQKSYSLLPCSPNSPKEETLGISSPETEASISLPKASLKKEEEKATTKNGPSRGQEKKRKAQNNKQAEKKEKEKSSLTPAEFEEIVQIVLQKSLQECLGMGSGLDFAETSCAQPIVSNQSAKEPGITASATDTDNANGEEVPHTQEISVSWEGEAAPDIRTSKLGQPDPVPSKKKSNRLTLSKRKKEAQDEKVEKTQSGHEHRQEDQLKETVQDHSQITDLQKGERSGFGQCLVWVQCSFPNCGKWRRLCGNIDPSVLPDNWSCDQNTADVQYNRCDIPEETWTGLESDVAYASYIPGSIIWAKQYGYPWWPGMIESDPDLGEYFLFTSHLDSLPSKYHVTFFGETVSRAWIPVNMLKNFQELSLELSGMKKRR…
Macaca nemestrina	Placental	MMTTLQNKEECGKGPKRIFAPPAQKSYSLLPCSPNSPKEETLGISSPETEASISLPKASLKKEEEKATTKNGPSRGQEKKRKTQNNKQAEKKEKEKSSLTPAEFEEIVQIVLQKSLQECLGMGSGLDFAETSCAQPIVSNQSAKEPGITASATDTDNANGEEVPHTQEISVSWEGEATPEIRTSKLGQPDPVPSKKKSNRLTLSKRKKEAHEKVEKTQSGHEHRQEDQLKETVQDHSQITDLQKGEISGFGQCLVWVQCSFPNCGKWRRLCGNIDPSVLPDNWSCDQNTDVQYNRCDIPEETWTGLESDVAYASYIPGSIIWAKQYGYPWWPGMIESDPDLGEYFLFTSHLDSLPSKYHVTFFGETVSRAWIPVNMLKNFQELSLELSGMKKRRNDCSQ…
Mandrillus leucophaeus	Placental	MMTTLQNKEECGKGPKRIFAPPAQKSYSLLPCSPNSPKEETLGISSPETEASISLPKASLKKEEEKATTKNGPSRGQEKKRKAQNNKQAEKKEKEKSSLTRAEFEEIVQIVLQKSLQECLGMGSGLDFAETSCAQPIVSNQSAKEPGITASATDTDNTNGEEVPHTQEISVSWEGEAAPEIRTSKLGQPDPVPSKKKSNRLTLSKRKKEAHEKVEKTQGGHEHRQEDQLKETVQDHSQIRDLQKGEISGFGQCLVWVQCSFPNCGKWRRLCGNIDPSVLPDNWSCDQNTDVQYNRCDIPEETWTGLESDVAYASYIPGSIIWAKQYGYPWWPGMIESDPDLGEYFLFTSHLDSLPSKYHVTFFGETVSRAWIPVNMLKNFQELSLELSGMKKRRNDCSQ…
Manis javanica	Placental	MMATLQSKEECGKGPKKIFAPPVQKLHSLMSYSLNSPKEETLGINSPAAEARPSLPKARLEKKKEKATSENGPSNGQEKKGKVQDKRAVKKGKEKASLTNDEFEEIVQIVLQKSLQECLETSCAQPIRSTQLDKEPGIAPPTTDNAHANGGRITGPDILELSASQEDGVIPEIKTSKTGQPDPVSSEKKFSRLSLSKRKKEAQDKVEKTQSGHEHKQKDQPKKIVRDHSHIREQQKGEESGFGQCQVWVQCSSPNCEKWRRLCGNIDPSVLPVNWSCDQNTDLEYNCCDIPEETWTGRESDVAYASYIPGSIIWAKQYGYPWWPGMVESDPDLGEYFLFASHLDSLPSKYHVTFFGERVSRAWIPVNMLKNFQELSLELTGVKNCRNKDCSQKLGAALM…
Marmota marmota	Placental	MTTLQKKEECGKGSKKPFAPPTQKLHSMIPHGPNSHRDETLGISSPVAEAKASPPKARLEKEEKATTEDGPGVGQEKKGKAQDKPAEKKEKGKSSLTNAEFEEIVQIVLQKSLQECLGMGSGLNFAETSCVQTNSQSDKEPGIASATDNDNAVGERKMIPHTPETSASVEDVPEIRTSKSAQLVPAPSEKKFNRLSLSKRKREAQDEKMEKVQGGHECREKDQPEKMIQGDSQIRGQQKGEESGFGQCLVWVQCSSPNCEKWRRLRGNIDPSILPDNWSCDQNTDLDYNRCDIPEEIWTGRESDVAYASYVPGSIIWAKQYGYPWWPGMVESDPDLGEYFLFASHLDSLPSKYHVTFFGETVSRAWIPVNMLKNFQELSLELAGVKKCRNKDYSQKLVA…
Meriones unguiculatus	Placental	MAMVQGNGEHEKGTKKTFAPPTQKSHSVKPQPKPWKEDSPGARSPEVEAKPSQLSASLEKKEQKAATENGPGRGREKKRKAHDKPAEKRGKEKTTLTNAEFEEIFQTVLQKSLQECLETSCVQRTIPTKADKEPGIAPSTTDNENADGEKEIVPASSPEEEVNSEIRTSELGQPATKPSKKKCNRLCLSKRKKKAENEKMEKIQDGHECTLRDKQKTMIQDHSQIKGQQKEEEGGFGHCLIWVQCSFPKCEKWRQLRGNIDPSVLPDNWSCDQNPDLNYNRCDIPEETWTGRESDVAYASYVPGSIVWAKQYGYPWWPGMIESDPDLGEYFLFASHLDSLPSKYHVTFFGEAVSRAWIPVSMLKNFQELSLELARVKKGRNKDYNQKLEAAITMAHKAE…
Mesocricetus auratus	Placental	MMATLRNNEEYEKGTKKTFAPPTQKSHNVKTQADSWKEDTQGTSSPEAEAKPSQPKTSSKKEQKTTTEHGPSRGQKKRKAQDKPAEKKGKEKQTLTDAEFEEIFQTVLRKSLQEYLETSCVQPIIPTKSDKEPGITSPATDNESADGEKVIVPDTPEIASSLEEDVNSEIRTSKPGQLAAEPSKKKINRLSLSKRKKKAEDEKMDEIQDECSLKDKQKTMIQGPSQIRDQQEEEEKEGGFGQCLIWVQCSSAKCEKWRQLRGDIDPSVLPDNWSCDQNPDLNYNRCDIPEETWTGCESDVAYASYVPGSIIWAKQYGYPWWPGMIETDPDLGEYFLFASHLDSLPSKYHVTYFGETVSRAWIPVSMLKNFQELSLELARGKKCRNKDYNQKLEAAIAMA…
Microcebus murinus	Placental	MMTTLQNKEECGKRPKKIFAPPVQKLHSLILCSTNSPKEETLGISSPETETRPHLPKARLEKKEEKATTENGPSSGQKKKGKAQDNKQVEKKAKEKSSISNEEFEEIVQIVLRKSLQECLGMGSGFDFAETSCAQPIVCTQSDKEPAITASATDNDTADREKVMVPHTPEIPASQDNDVVSAISTSKLGQPDLAPSGKKFNRLPLSKRKKEAQDEKMEKVQGGHEHRQKDQRKKMVQDHSHIRNQQKRKQSGFGQCLIWVQCSSPNCEKWRRLRGNIDPAVLPDNWSCDQNTDLEYNSCDIPEETWTGHESDIAYASYIPGSIIWAKQYGYPWWPGMVESDPDLGEYFLFASHLDSLPSKYHVTFFGETVSRAWIPVNMLKNFQELSLELAGVKKCRNK…
Microtus ochrogaster	Placental	MMAALQNDKEYEKGTKKNFAPPTQKSHSVKQLNSWKEDTLGTNSQEAEAKPSRPKASSKKERKKATEQGPGGGQENKPAEKKGKEKPTLTNAEFEEIFQIVLQKSLQEYLETSCVQPMTPTKSDKESGVAPSATENENADGEKVIVPGTPKMASSLEEEVNSEIKTSKPGQLVTEPSKKKFNRLCLNKRKKKAEDEKMETIQDGRECSLKDKQKTMSQDHSQIRGQKEEEGGFGQCLIWVQCSFPKCEKWRQLRGDIDPSVLPDNWSCDQNPDLNYNRCDIPEETWTGCESDVAYASYIPGSIIWAKQHGYPWWPGMIEPDPDLGEYFLFASHLDSLPSKYHVTYFGETVSRAWISVSMLKNFQELSLELSKVKKCRNKDYSQKLEAAITMAHEAEQIN…
Miniopterus natalensis	Placental	MMTTLHSKEEYGKGSKKTFTPPAQKLHSLMPYNPNLPKEKTLGISSLEAESRANLLKARLEKKEEEETTENGPSSCQEKKVKAQDNKQAEKKEKEKSSLTNEEFEEIVQIVLQKSLQQCLGIESSLNFAETSCVQPIRCTQLDKEPAIASSTDNDNADRERVMVPHILAILASQEDGIISEINTSKPGQPDPALSEKKFGKLSLRKRKKAQDEKMKKAQHGHEHRQKDQPKKIVQDHSQMRDQRKGEESGFGQCLVWVQCSSPNCEKWRRLHGNIDPSVLPDNWSCDQNTDLEYNRCDIPEETWIGRESDVAYASYIPGSIIWAKQYGYPWWPGMIESDPDLGEYFLFASHLDSLPSKYHVTFFGETVSRAWIPVNMLKNFQELSLELAGVKKFKNKDC…
Monodelphis domestica	Marsupial	MHANQVRGRLPKPQGLTLAMVTSPLGGQRALRRALPLRRAPTLFKQREKPASKLNDDDLKEQGKLLETPYPPITLASKEEGIVPGTQSSKSDILPSEKKQNTLPLSNKKKEENKEKTKLTQESCKHRRKGQSRKIVQGYTQISDQEESGGEWAGNFGIAWVQCSFPSCEKWRQLHGNINSSSILPDNWSCSQNTGGQLDPDLGEYFLFTSQQDVLPAKYHVTFFGNSVSRAWISSNMLKNFQELSLEQVERDQVSLFGFSSRCKENASEPDSSEEEGDIFFKETKKTQSTGSSNSGFSKEESKVTHLSSQILFLSVAQPWWQPSLVLRLSMLPSGFGISFGQVTPFKMPFSSSKKQRSLPLKG
Mus caroli	Placental	MMAALQTHKEYEKGTKKTFAPPTQKLHSKKPQPSSWKEDTPGTSSPEAETKPSLLKASLKKEQKATTEHGPNRGQEKKLKAQDQPAKKKGKEKTLTNAEFEEIFQIVLQKSLQECLETSSCVQHIRPTKLDEEPGIVPPATDKKNAEPEKVVTPDTPKIASSLEEEVNSEMGTSKLGQPVTEPSKKKFNRLSLSKQKEKAADEKMEKIQDGRECSLKEKQKIVIQDQSQIRGHQKEEESGFGHCVIWVQCSSPKCEKWRQLRGNIDPSVLPDDWSCDQNPDPNYNRCDIPEESWAGCESDVAYASYVPGSIIWAKQYGYPWWPGMIEADPDLGEYFLFASHLDSLPSKYHVTFFGETVSRAWIPARMLKNFQELSLELVKKCKNKNSNQKLEAAIAMAH…
Mus musculus	Placental	MMAALQTHKEYEKGTKKTFAPPTQKLHSEKPQPSSWKEDAPGTSSPEAETKPSLLKASLKKEQKPTTEHGPNRGQERKLKAQDQPAKKKGKERTLTSAEFEEIFQIVLQKSLQECLETSSCVQHIRPTKLDEEPGIVPPATDKKDADPEKVITPDTPKIASSLEEEVNSEMGTSKLGQPVTEPSKKKFNRLSLSKQKKKAEDEKMEKIQDGRECSLKEKQKIVIQDQSQIRGPQKEEESGFGHCVIWVQCSSPKCEKWRQLRGNIDPSVLPDDWSCDQNPDPNYNRCDIPEESWAGCESDVAYASYVPGSIIWAKQYGYPWWPGMIEADPDLGEYFLFASHLDSLPSKYHVTFFGETVSRAWIPVRMLKNFQELSLELVKKCKNKNSNQKLEAAIAMAH…
Mus pahari	Placental	MDREFINSFHLLPLYPQEFWEKTLTNAEYEEIFQTVLQKSLRECLETSSCXQHIRPTKSDEKPGIVPSVTDKKNADPEKVVTPETPKIASSLEEEVNSEMGTSKLGQPVTEPSKKKFDRFSLSKQKEKAEDEKMEKIQDGHECTLKEKQKIVIQDQAQIRGHQKGGDSGFGHCVIWVQCSSPKCEKWRQLRGDIDPSVLPDDWSCDQNPDLNYNRCDIPEESWAGCEGDVAYASYVPGSIIWAKQYGYPWWPGMIEADPDLGEYFLFASHLDSLPSKYHVTFFGETVSRAWIPVRMLKNFQELSLELARVKKCKNKDSNQKLEAAIVMAHRAEQTSIQERVNLFGFWSRYNGADISGEGKGRKRDGG
Mustela putorius	Placental	MTSLQSKEACGKGPKKTFAPPAPKLHSLMCYSPKPPKEDTVGISSPKARLEKKEEKATTENGPSSGQENKGKPQDKQVEKKEKERSSLTSAEFEEIVQIVLRKSLQECLETSCAQPIRCTQLDKEPGIASSTENDKADGERVMAPHILEISATKEAGVSSVIKMSKPGQPDPVPSEKKFNRTSLSKRKKGAQDDKMEKAQNTHEQRQKDQLKKPVQDDSQTRNQQKGEGSGFGQCLVWVQCSSPNCEKWRRLCGNVDPSVLPDNWSCDQNTDSRYNRCDIPEECWTGRESDVAYASYIPGSIIWAKQYGYPWWPGMVESDPDLGEYFLFASHLDSLPSKYHVTFFGETVSRAWIPVNMLKNFQELSLELARMKKCRNKDCNQKLGAALTMAQEAEQISI…
Myotis brandtii	Placental	MMTTLQSKEEYGKGSKKPFIPPAQKVHSLMPYNPNSHKEETLGISSLEAEAGPNLLKAKLEKKEEEATTVNGPCSDQEKKVKVQDNKQAEKKEKEKSNLTNEEFEEIVQIVIQKSLQECLGMAYETSCAQPIRHTQLDKEPGIASSTTDNDNADREWVTVPHILEISASQEDGIIPSKPDQPDLASSEKKFSKLSLRRRKKKAQDEKMKKAQRGHEHKQKDQLKKMVQDHAQIRDQQKGEESGFGQCLVWVQCSSPNCGKWRRLHGNADPSVLPDNWSCDQNTDLEYNHCDIPEETWIGHESDVAYASYIPGSIIWAKQYGYPWWPGMVESDPDLGEYFLFASHLDSLPSKYHVTFFGETVSRAWIPVNMLKNFQELSLELAGVKKCRNKDCSQKLGAA…
Myotis davidii	Placental	MMTTLQSKEEYGKGSKKPFIPPAQKLHSLMPYNPNSHKEETLGVSSLEAEAGPNPLKAKLEKKEEEATTVNGSCSDQEKKVKVQDNKQAEKKEKEKSNLTNEEFEEIFQIVIQKSLEECLGMAYETSCAQPIRHTQLDKEPGIASSTTDNDNADREWVTVPHILEISASQEDGIIPSKPGQPDLASSEKKFSKLSLRRRKKKAQDEKMKKAQRGHEHKQEDQLKKMVQDHVQIRDQQKGEESGFGQCLVWVQCSSPNCGKWRRLHGNADPSVLPDNWSCDQNTDLEYNHCDIPEETWIGHEGDVAYASYIPGSIIWAKQYGYPWWPGMVELDPDLGEYFLFASHLDSLPSKYHVTFFGETVSRAWIPVNMLKNFQELSLELAGVKKCRYKDCSQKLGAA…
Myotis lucifugus	Placental	MMTTLQSKEEYGKGSKKPFIPPAQKVHSLMPYNPNSHKEETLGISSLEAEAGPNLLKAKLEKKEEEATTVNGPCSDQEKKVKVQDNKQAEKKEKEKSNLTDEEFEEIVQIVLQKSLQECLGMAYETSCAQPIRHTQLDKEPGIASSTTDNDNADREWVTVPHILEISASQEDGIIPSKPDQPDLASSEKKFSKLSLRRRKKKAQDEKMKKAQRGHEHKQKDQLKKMVQDHAQIRDQQKGEESGFGQCLVWVQCSSPNCGKWRRLHGNADPSVLPDNWSCDQNTDLEYNHCDIPEETWIGHESDVAYASYIPGSIIWAKQYGYPWWPGMVESDPDLGEYFLFASHLDSLPSKYHVTFFGETVSRAWIPVNMLKNFQELSLELAGVKKCRNKDCSQKLGAA…
Nannospalax galili	Placental	MGNIWQSFGHISSEYEKGPKKTFVPPTQKSHSVKPPDANLLMENTPGISSPEAEAKRSPPQVSLKKKRKKNKKKAATENGASRDQEKKQKARGKPGEKKRKEKSTLTNEEFEEIFQTVLKKSLQECLESSCVQSTMHSQPDKEQGFTSSATGNENADGEMAIASETPKISSSLDDKVVSEISTLKLDQPVPEPPKKKFNRLSSNKRKKKTESSCVQPRMYSQPDKEPGFTSSATGNENDDGEMAIASETPEISSSLDNKVVSEIRTLKLDQPVPEPPKKKFNRLPLNKRKKKTENEDEKMESIQDGHEHRLEVLQKATIKDPSQIRSQQKEEKNGFGQCLVWVQCSFPKCEKWRRLLGNTDPSVLPDNWSCDQNPDVNYNRCDIPEETWTGCESDVTYA…
Neomonachus schauinslandi	Placental	MRTLSVLDSVFHKFHLIIKFLSECGKGPKKTFAPPAQKLHSLMCYSPNPPKEETLEISSPKARSEKKEEKATTENGPSGGQENKGKPQDKQAVKKEKERASLTNAEFEEIVQIVLRKSLQECLDTSCAQPIRCTQLDKEPRIASSTDNDNADGERVMAPHILEISATEEAGVTSVIKRSKPGQPDPAPSEKKFNRSSLSKGKKGAQDEKMEKAQSGHEQRQKDQLKKTVQDDSQTRNRQKGEGGGFGQCLVWVQCSSPNCEKWRRLCGNIDPSVLPDNWSCDQNTDLRYNRCDIPEESWTGRESDVAYASYIPGSIIWAKQYGYPWWPGMVESDPDLGEYFLFASHLDSLPSKYHVTFFGETVSRAWIPVNMLKNFQELSLELAGVKKCRNKDCNQKLG…
Nomascus leucogenys	Placental	MMTTLQNKEECRKGPKRIFAPPAQKSYSLLPCSPNSPKEETLGISSPETEARISLPKASLKKKEEKATMKNVPSREQEKKRKAQINKQAEKKEKEKSSLTNAEFEEIVQIVLQKSLQECLGMGSGLDFAETSCAQPIVSTQSDKEPGITASATDTDNANGEEVPHTQEISVSWEGEAAPEIRTSKLGQPDPAPSKKKSNRLTLSKRKKEAHEKVEKTQGGHEHREEDQLKKTVQHHSQIRDQQKGEISGFGQCLVWVQCSFPNCGKWRRLCGNIDPSVLPDNWYCDQNTDVQYNRCDIPEETWTGLESDVAYASYIPGSIIWAKQYGYPWWPGMIESDPDLGEYFLFTSHLDSLPSKYHVTFFGETVSRAWIPVNMLKNFQELSLELSVMKKRRNDCSQ…
Ochotona princeps	Placental	MMATVQNKEECGKGPKKTFAPPTQKSHFLVPCDPKAPKTETLGVKAPEAKARPRPPKSRLEMNEEKADTENGSGIGQEQKGKTPEKKQNKQAVKKEKGRSSLTNAEFEEIVQIVLQKSLQEYEGMGSDFHFSDTSCAQSMVCTGSDKVPGNAASATGNDAVDGEKMIVIHAAETSAPQEDKAVPVFRGSKQGRPDPAPSEKKSNRPRLSKRKREAQDEKMESGQGGHEHRQKNEPKKMIQDLSQIRRVQEGENVKSGFGQYLVWVQCSSSNCEKWRRLHGNIDPSVLPDNWSCAQNPDLKYNSCDIPEESWTGRDSEVAYATYIPGSIIWAKQYGYPWWPGMVESDPDLGEYFLFASHLDLLPSKYHVTFFGETVSRAWIPVNMLKNFQELSLELTGMK…
Octodon degus	Placental	MLLSISEKVMEKLILTDSEFEEIVQTVLRKSLKECFETSCVKPTVYIQSGKEPGIITSATNDDNASGEKVMVPHTPEISLSLEDEVTPEMSASGPGQAVPAPSEKKVDREYLSKRKKEAQGEKMETPKDGHEHRQRDQLKDMLWNHSQTKDQTKKRKRDGFGHCVVWVQCSSPNCRKWRRLCRNIDPSVLPDNWFCHQNTDLDYNCCDIPEETWTGNESEVVYASYIPGCIIWAKQYGYPWWPGMVESDPDLEEYFLFASHFDSLPSKYHVTFFGETVSRAWIPVNMLKNFQELSLEQTGVKKCRNKDYIQKLEVAVMMAHKAEQTDIEDRVNLFGFWNRYCGSDSNEEKQDLMLPGANSPESNVEKEDNELEVEEKEKKDPTLPGPKSAKMKTKNPKL…
Odobenus rosmarus	Placental	MMTTLQSKEEYGKGPKKTFAPPAQKLHSLMCYSPNSPKEETLGISALKSRSEKKEEKATTENGPSSGQENKGKPQDKHAEKKEKERASLTNAEFEEIVQIVLRKSLQECLETSCAQPIRCTQLDKERGVSSSTDNDDADGERVMVPHILEISATEEAGVTSVRKTSKPGQPDPAPSQKKFNRPSLIKGKKRAQNEKMEKAQSGHEQRQKIQLKKTVQDDSQTRNQQKGEGGGFSQCLVWVQCSSPNCEKWRRLRGNIDPSVLPDNWSCDQNTDLRYNRCDIPEESWTGRESDVAYASYVPGSIIWAKQYGYPWWPGMVESDPDLGEYFLFASHLDSLPSKYHVTFFGETVSRAWIPVNMLKNFQELSLELAGVKKCRNKDCNQKLGAALTMAQEAEQIS…
Odocoileus virginianus	Placental	MMPTLESKEKCGKGQKNTFAPPAQKLHSPMPYNLNSSKEEIPEISSPQAEVRPSLLKAGLEKKKEKTPTENGPVSGQEIKGKAQDSKKAKKEKKKSTLTSAEFEEIVQTVLRKSFQECLETSCTQPTRCTQLDKEPGIASSNTSDNNNADGDRVVVPPILEISASQEDGIIPEIKISKPGQPDSASSEKKVNKFSLSKRKKEAQDEKMETDQSGHEHRQDDQQKETIQDHSQDRDQQKGEGSGFGQCLVWVQCSSPNCEKWRRLHGNIDPSVLPDNWSCDQNTDLQYNRCDIPEETWTGHESDVAYASYIPGSIIWAKQYGYPWWPGMVEPDPDLGEYFLFASHLDSLPSKYHVTFFGETVSRAWIPVNMLKNFQELSLELNGLRKCKNKDCIQKLGLA…
Oncorhynchus mykiss	Bony fish	METVAGQKEKAKFAPLVPREKKPGHGEKGGGKRSENKWKGEGGGNKERNIDVGKKTGESCEGERGVESKGKASGLEKKRGERMKKEGKKKTPDTEKVRAADEGVPQQQEGKGERGGGEGAKENKKQKNKEDLSRKETDKGKEGMNGKKKKKENEKVRKEGKETKKKRPRDETESNKVLPLTDSQYDDIFDSATALETPVDNCLEDARAVLSEVELLQATIDQVSLREEEQPPRRVSGERKTAASGSHTQRKRKRRREEEEDSDSSAEFDQWVQCSRSVCGKWRRVERHVDLAALPSDWTCIHDTGPGLCEATEDSWSGQECDVINSSLVPGSLVWAQQIGYPWWPAIVERDPDTKTFCQFNRNTDLYPCRYHVTYLGEPVSRAWVCRSKVRTYTELTED…
Oncorhynchus tshawytscha	Bony fish	MNLATSTEWALPIATSTEWALPIATSTEWALPMELAKQNALRSGGQKEKAKFAPLVPREKKPGHGEKGGGKRSENKWKGEGGGNKERNIDVGKKTGESCEGERVVESKGKASGLEKKRGERKKKEGKKKTPDTEKVLPLTDSQYDDIFDSATALETSVDNCLEDARAVLSEVELLQATIDQVSLREEEQPPRRVSGERKKRRREEEEDSDSSAEFDQWVQCSRSVCGKWRRVERHVDLAALPSDWTCIHDTGPGLCEATEDSWSGQECDVINSGLVPGSLVWAQQIGYPWWPAIVERDPDTKTFCQFNRNTDLYPCRYHVTYLGEPVSRAWVCRSKVRNYTELTEDAAITRRLSRFGFWTQQTSDRESSEDSEISEVLEMLLDHEKSRRSAYARNKKSA…
Orcinus orca	Placental	MMTTLQSKEECGKGPKKTFAPPAQKLHSLMPYNLNSSKEEILGISSPEAETRPSLLKARLEKKKEKTTKENGTSSGQEIKGKAQDSKKAEKKEKGKSTLTNAEFEEIVQIVLQKSLQECLGMESSLDFAETSCAQPTRCTQLDKEPGIASSTTDNNSADGVVVPHILEISASQEGGVIPEIKTSKPGQPDPAPSEKKFNKLSLSKRKKAAQNEKMEKAQSGHEHRQKDQLKKTVQDHSQIRDQQKGEGSGFGQCLVWVQCSSPNCEKWRRLRGNIDPSVLPDNWSCDQNTDLEYNHCDIPEETWTGHENEVAYASYIPGSIIWAKQYGYPWWPGMVESDPDLGEYFLFASHLDSLPSKYHVTFFGETVSRAWIPVNMLKNFQELSLELAAVKKCKNKDF…
Orycteropus afer	Placental	MMATLQNKEEYGKGPKKTFAPPVQKLHRLMPLSPNSLKEDTREISSPEAEATASLPKARLEKKNEKAHTENGPGSGQEERGKNLCNKQAEGKVEKERTSLTNAEFEEIVQIVLQKSLQECLGIGSDLGFAETSCVRPIGYTQSGKERGIASITAASDSADGSGKIPISIGKKTNQFVVWVQCSSPNCEKWRRLHGNIDPSTLPDNWSCAQNIVDREGYGVYEEKKIREIQWPGMVESDPDLGEYFLFASHLDSLPKKYKNKDCIQKLEAALKMAQEAEQVNIQAPMNVIDQISGMIGRVERRINKNLMLSGPNSSNSRFEKEEEVESEMEEEEEKKIEGPGPREPLCWEAGGAAPEDEASSDLDLEQLLEDVGEEPEPREESLRRDAGEDVTMALLEE
Oryctolagus cuniculus	Placental	MMAAVQNKEECGKGPKKTFAPPIQKLHFLKPCGPKAPKEEALGPSSPEAEARPSLPKARLEMNEEKTTTENGPSSGQEKKGKPQDNKQNKQAEKKEKGRSSLTNAEFEEIVQTVLRKALQECEAACSCAPWEAAESSCAQLVVCTQSDKVPGIVASTGNDTADGERMMVIHTPEISAPQEDEVAPESRASKRGQPNPAPSEKKLSRPCLSKRKKEAQDEQVERVQGGHEHRQKDQPKKMIQDLSQIRGKQKEDKSGFGQYLVWVQCSSPNCEKWRRLHGNIDPSVLPDNWSCDQNTDLKYNSCDIPEETWTGCESEVAYATYIPGSIIWAKQYGYPWWPGMIESDPDLGEYFLFASQLDSLPSKYHVTFFGETVSRAWIPVNMLKNFQELSLELAGVKK…
Otolemur garnettii	Placental	MGSGLDFAETSCAQPVVCTPSGKEPAITTSATDNDNTDREKIMVPHTPEISASQENEVISEIRTSKLGQLDPAPSEKKFNRFPVSKRKKEAQDEKMEKVQGRHENRQTDQLKKMVQDHSQIKKQQKEKQSGFGQCLIWVQCSSPNCEKWRRLHGNIDPSVLPENWSCDQNTDLEFNRCDIPEETWTGCESDVAYASYVPGSIIWAKQYGYPWWPGMVESDPDLGEYFLFASHLDSLPSKYHVTFFGETVSRAWIPVNMLKNFQELSLELAGMKKYKNKDCSQKLGAALMMAQEAEQINIQERVNLFGFRTRYSGSNSSGEGKDLMLSETNNPDSCWEKEEEEEKEEEKEEQEEVEEEEEEGEKYPTLSGPKSVKMQTKKFKPRGMANGRDGTLKRETVK…
Ovis aries	Placental	MMPTLESKEKCGKGPKNTFAPPAQKLHSLMPYNLNSSKEEEIPEISSPQAEVRPSLLKAGLEKKKEKTTTENGPGSGQEIQGKAQDSKNTKKEKEKSTLTDAEFEEIVQIVLRKSFQECLETSCTQPTRCTQLDKEPGIASSNTSDNNNADGDRVVVPPILEISASQEDGIIPEIKISKPGQPDSASSEKKFNKLSLSKRKKEAHEKMEKDQSEHEHRQDDQHKKTIQDHSQNGDQQKGEGNGFGQCLVWVQCSSPHCEKWRRLRGNIDPSVLPDNWSCDQNTDLQYNRCDIPEETWTGHESDVAYASYIPGSIIWAKQYGYPWWPGMVEPDPDLGEYFLFASHLDSLPSKYHVTFFGETVSRAWIPVNMLKNFQELTLELSGVRKCKNKDCSQKLGVA…
Pan paniscus	Placental	MMTTLQNKEECGKGPKRIFAPPAQKSYSLLPCSPNSPKEETPGISSPETEARISLPKASLKKKEEKATMKNVPSREQEKKRKAQINKQAEKKEKEKSSLTNAEFEEIVQTVLQKSLQECLGMGSGLDFAETSCAQPVVSTQSDKEPGITASATDTDNANGEEVPHTQEISVSWEGEAAPEIRTSKLGQPDPAPSKKKSNRLTLSKRKKEAQDEKVEKTQGGHEHRQEDQLKETVQDHSQIRDQQKGEISGFGQCLVWVQCSFPNCGKWRRLCGNIDPSVLPDNWSCDQNTADVQYNRCDIPEETWTGLESDVAYASYIPGSIIWAKQYGYPWWPGMIESDPDLGEYFLFTSHLDSLPSKYHVTFFGETVSRAWIPVNMLKNFQELSLELSVMKKRRNDC…
Pan troglodytes	Placental	MMTTLQNKEECGKGPKRIFEPPAQKSYSLLPCSPNSPKEETPGISSPETEARISLPKASLKKKEEKATMKNVPSREQEKKRKAQINKQAEKKEKEKSSLTNAEFEEIVQTVLQKSLQECLGMGSGLDFAETSCAQPVVSTQSDKEPGITASATDTDNANGEEVPHTQEISVSWEGEAAPEIRTSKLGQPDPAPSKKKSNRLTLSKRKKEAQDEKVEKTQGGHEHRQEDQLKETVQDHSQIRDQQKGEISGFGQCLVWVQCSFPNCGKWRRLCGNIDPSVLPDNWSCDQNTADVQYNRCDIPEETWTGLESDVAYASYIPGSIIWAKQYGYPWWPGMIESDPDLGEYFLFTSHLDSLPSKYHVTFFGETVSRAWIPVNMLKNFQELSLELSVMKKRRNDC…
Panthera pardus	Placental	MMAMLQSKEEHGKGSKKTFAPPVQKMHSLMCYSPNSPKEETLGISSSKDRLEKKEEKATTENGPSSGQEKKGKAQDKQAEKKEKEKLSLTNAEFEEIVQIVLRKSLQECLETSCAQPIRRAQLDKEPGIASSTDNDNADGEKVMVPHILEISATKEAGVTSVIETPKPGQPDPPPSEKKFNRFSLSKGKKGAQDEKMEKAQSGREPRQKAQLKKTVQNHSQIRNQQKGEVSGFGQCLVWVQCSSPNCEKWRRLCGNIDPSVLPDNWSCDQNTDLKYNRCDIPEESWIGHESDVAYASYIPGSIIWAKQYGYPWWPGMVESDPDLGEYFLFASHLDSLPSKYHVTFFGETVSRAWIPVNMLKNFQELSLELAGVEKLCWEKVPCLTKCARVRLFMRDSSF…
Panthera tigris	Placental	MMATLQSKEEHGKGSKKTFAPPVQKIHSLMCYSPNSPKEETLGISSSKDRLEKKEEKATTENGPSSGQEKKGKAQDKQAEKKEKEKLSLTNAEFEEIVQIVLRKSLQECLETSCAQPIRRAQLDKEPGIASSTDNDNADGEKIMVPHILEISATKEAGVTSVIETPKPGQPDPPPSEKKFNRFSLSKGKKGAQDEKMEKAQSGREPRQKAQLKKTVQNHSQIRNQQKGEVSGFGQCLVWVQCSSPNCEKWRRLCGNIDPSVLPDNWSCDQNTDLKYNRCDIPEESWIGHESDVAYASYIPGSIIWAKQYGYPWWPGMVESDPDLGEYFLFASHLDSLPSKYHVTFFGETVSRAWIPVNMLKNFQELSLELAGVEKLCWEKVPCLTKCARKKCRNKDCSQ…
Pantholops hodgsonii	Placental	MMPTLESKEKCGKGPKNTFAPPAQKLRSLMPYNLNSSKEEIPEISSPQAEVRPSLLKARLEKKKEKTTTENGPGSGQEIQGKAQDSKNTKKEKEKSTLTDAEFEEIVQIVLRKSFQECLGMASSLDFSETSCTQPTRCTQLDKEPGVASSNTSDNNNADGVVVPPILEISASQEDGIIPEIKISKPGQPDSASSEKKFNKLSLSKRKKEAHEKMEKDQSEHEHRQDDQHKKTIQDHSQNGDQQKGEGNGFGQCLVWVQCSSPHCEKWRRLRGNIDPSVLPDDWSCDQNTDLQYNRCDIPEETWTGHESDVAYASYIPGSIIWAKQYGYPWWPGMVEPDPDLGEYFLFASHLDSLPSKYHVTFFGETVSRAWIPVNMLKNFQELTLELSGRKCKNKDCSQ…
Papio anubis	Placental	MFHKFHVITFLSECGKGPKRIFAPPAQKSYILLPCSPNSPKEETLGISSPETEASISLPKASLKKEEEKATTKNGPSRGQEKKRKAQNNKQAEKKEKEKSSLTPAEFEEIVQIVLQKSLQECLGMGSGLDFAETSCPQPIVSNQSAKEPGITAAATDTDNANGEEVPHTQEISASWEGEAAPEIRTSKLGQPDPVPSKKKSNRLTLSKRKKEAQDEKVEKTQGGHEHRQEDQLKETVQDHSQIRDLQKGEISGFGQCLVWVQCSFPNCGKWRRLCGNIDPSVLPDNWSCDQNTADVQYNRCDIPEETWTGLESDVAYASYIPGSIIWAKQYGYPWWPGMIESDPDLGEYFLFTSHLDSLPSKYHVTFFGETVSRAWIPVNMLKNFQELSLELSGMKKRR…
Paramormyrops kingsleyae	Bony fish	MEINSGTKEKLVPGKWKNQGKKEAKKTADKDEKERGRYGCLMLPVQKENYSEGKERELDKGKHMTITAKGFKSIKNIKQNKKENEPNGERKVITDGKVCNGGVKRKQKTASEEDFKEGCRKTNAMGTDRGGLLLQRGKAGKKQEEKCKMRSHQGLEESGKKEKVGAERIGGKKEGCRHVGAQLCASGKSAGGKGQSQANPRKDNDRSRKVPCFTKQILPDAQLHDRFQGFLDSSLEHCLEDAQMVLNEVEGLQAKVESSHDRSKESKKEKLPRERKEATVQKPEAKKEYKDRLEEHTEDQCEHDDRWVQCSISRCKKWRKLDKHVDLSVLPPKWTCVQSSEPDCYNCNCPEETWSGSQDDVVHSSLVPGSLVWAQLQGYPWWPAMTESDPDSKSIFFFN…
Pelodiscus sinensis	Turtle	MKKTFAPPLAKSHVLSLREGPEHHAKKEDMREKEVIIYPLSQGTDDSTETKLKADNSDTDVKRWKKSKVRKEEEDVQKRAKRNSSKASTKEMCHLTDLHFEEIVQRALQKSLQECMEESKRTFHQAEVSEVAEQQGLKKETLETSLPAENLVLGSDDPKGRVFAVDLKESMAKPKKCNKLPLNKKRKEMSDESTEANKERRKCHRKGEPKKIVQGYTLITDQEETEEGGGSAFNQCVAWVQCSYPSCEKWRRLSSDVDPSVLPEDWTCSQNTDLQYKSCDAPEEMWSGSENDVVYATYVPGSIIWAKQFGYPWWPGMVECDPDIGEYFLFSSRLDSLPSKYHVTFFGNSVSRAWISATKLRNFHELSTYSLGLKKLRNKDYCQKLDSAVKMAKEAEQIS…
Peromyscus maniculatus	Placental	MMATLQNYEESEKGTKKTFAPPTQKPHIVKPQPKSWKEETLGTSSPEAEAKPSRPKASSKKREQKTATEHGPSGGQEKKQKAQDKPAEKKGKSLQEKPTLTNAEFEEIFQSVLQKSLQECLGMAWCEEKRLPSVRQSGRYPRETSCAQPIIPTKSDREPGIAPSADNENADGEKVIVPDTPEIASSLEEEVSSETRTSKSGQPVTEPSKKKFNRLFSSKRKKKAEDEKIQDGHECSLKAKQKTMIQDHSQIRGQQKEEEGGFGQCLIWVQCSSPKCEKWRQLRGGIDPSVLPDNWSCDQNPDLNYNRCDIPEETWTGCESDVAYASYVPGSIIWAKQYGYPWWPGMIESDPDLGEYFLFASHLDSLPSKYHVTYFGETVSRAWIPVSMLKNFQELSLEL…
Phascolarctos cinereus	Marsupial	MMATLKNKEGGNGQKKAFTPPGQKACTMMPSSLDAPENEETQEMGLPEENARQDQLKDKIQKKKKEKVTRKSSGSDKEGKGPLATKTSKEQDTKGNERKTEKETPSLTNEQFEEIVQCVLKKSLQECLDVTCETSHAQRIEYSPGAKETSTTTTDVDRKLPGISHSTDIPVSTEDKIVPGTQSSTSDPLPSEKKQNKLSLSKKRKEAKDEKPELTKSDYKHRRKGQPRKIVQGYTQISDQEEAGGEWTSNFSQCVAWVQCSFPKCEKWRRLHGNIDPSVLPDDWSCSQNTDLQFNHCDIPEETWSGGESDVVYASYIPGSIIWAKQYGYPWWPGMVESDPDLGEYFLFASQQDVLPSKYHVTFFGDTASRAWIPSSMLKNFQELSLEQIEPKKIKNRDC…
Physeter catodon	Placental	MMTTLQSKEECRKGPKKTFAPPAQKLHSLMPYNLNSSKEEILGISSPEAETRPSLLKARLEKKKEKTTKENGTGSGQEIKGKAQDNKKAEKKEKGKSTLTNAEFEEIVQIVLQKSLQECLGMESSLDFAETSCAQPTRCTHLDKEPGIASSTTDNNNADGERVVVPHILEISASQEGGVIPEIKTSKPGQPDPAPSEKKFNKLSLSKRKKAAQDEKMEKAQSGHEHRQKDQLKKTVQDHSQIRDQQKGEGSGFGQCLVWVQCSSPNCEKWRRLRGNIDPSVLPDNWSCDQNTDLEYNHCDIPEETWTGHESEVAYASYIPGSIIWAKQYGYPWWPGMVESDPDLGEYFLFASHLDSLPSKYHVTFFGETVSRAWIPVNMLRNFQELSLELAGVKKGRNK…
Piliocolobus tephrosceles	Placental	MMTTLQNKEECGKGPKRIFAPPAQKSYSLLPCSPNSPKEETLGISSPETEASISLPKASLKKEEEKATTKNGPSRGQEKKRKAQNNKQAEKKEKEKSSLTPAEFEEIVQIVLQKSLQECLGMGSGLDFAETSCAQPIVSTQSAKEPGITASATDTDNANGEEVPHTQEISVSWEGEAAPEIRTSKLGQPDPVPSKKKSNRLTLSKRKKEAQDEKVEKTQGGHEHRQEDQLKETVQAHSQIRDLQKGEISGFGQCLVWVQCSFPNCGKWRRLCGNIDPSVLPDNWSCDQNTADVQYNRCDIPEETWTGLESDVAYASYIPGSIIWAKQYGYPWWPGVIECDPDLGEYFLFTSHLDSMPSKYHVTFFGETVSRAWIPVNMLKNFQEMSLELSGMKKRRNDC…
Pogona vitticeps	Squamata	MPQRTFAPPVAKPNHAPFAKGKLEAPQSRQEDGVATKPIKIPPKKSNQKQEMNTSSTATPLKCRKDGVMGKERENYLTDAQYDEIFRSVLQKPLQECMEISGMKGVSVEANKEQILGRETLTASPTSKDDVYGKISKENSERMPLEAKKKEHPLGMKKYGKCFQHNNKGKEKNEKPEADNGGCKENRKGAPKKKVKGNTQVVIDQEEMQEEEKSDRGSGSCWCIAWVQCSSPTCKKWRQLPSDIDPSVLPEDWSCSQNTDLQCNSCSVPEETWSGSENEVVYAVYIPGSIVWAKQYGYPWWPGLIEADPDIEEYFLFSSQMDLLPSKYHVTFFGSSVTRAWISASSLRNFSEANVKENGLAKLKNKADKRDLETALKMAKEAEQISIQERIRRFGFFSR…
Pongo abelii	Placental	MMTTLQNKEECGKGPKRIFAPPAQKSYSLLPCSPNSPKEETLGISFPETEARISLPKASLKKKEEKATMKNVPSREQEKKRKAQINKQAEKKEKEKSSLTNAEFEEIVQIVLQKSLQECLGMGSGLDFAETSCAQRIVSTQSDKEPGITASATDTDNANGEEVPHTQEISMSWESEAAPEIRTSKLGQPDPAPSKKKSNRLTLSKRKNEAQDEKVEKTQGGHEHRQEDQLKKTVQDHSQIRDQQKGEISGFGQCLVWVQCSLPNCGKWRRLCGNIDPSVLPDNWSCDQNTDVQYNRCDIPEETWTGLESDVAYASYIPGSIIWAKQYGYPWWPGMIESDPDLGEYFLFTSHLDSLPSKYHVTFFGETVSRAWIPVNMLKNFQELSLELSVMKKCRNDCS…
Propithecus coquereli	Placental	MMTTLQNKEECGKGPKKIFAPPAQKLHSLIPCSPNSPKEETLGISFPETETRPHLPKARLEKKEEKATIENGLSSGQKKKGKAQDNKQVEKKAKEKSSISNAEFEEIVQIVLRKSLQECLGMGSGLDFSETSCAQPIVCTQSDKEPAITTSATDSDNADREKVMVSHTPEISASQDNDVVSEISTSKSGQPDPAPSGKKFNRLPLSKRKKEAQDEKMEKVQGGHEHRQKDQLKKMVQGHSQIRNQQKGKQSGFGQCLIWVQCSSPNCEKWRRLRGNIDPSVLPDNWSCDQNTDLEYNSCDIPEETWTGHESDIAYASYIPGSIIWAKQYGYPWWPGMVESDPDLGEYFLFASHLDSLPSKYHVTFFGETVSRAWIPVNMLKNFQELSLELAGVKKCRNK…
Pteropus alecto	Placental	MMTALQSKEEYGKGSKKSFAPPAQKLHSLIPDSLNSPKEETLGISSLETEARPNLLKARLKKKEKATTENGSSNGQEKKIKAQDNKQKEKKEKEKSSLTNAEFEEIIQIVLQKSLQQSLETSCAQPIRYTQFDKEPGITSSTTDNDNADGERVMVPHILEISASQEGGVIPEIKMSKPGQPDPAPSEKKFNRLSLSKRKKEAHEKMKKAQSEHKHRQKDQPKKMVQDHSQFTDQQKREESGFGQCLVWVQCSFPNCEKWRRLRGNIDPSVLPDNWSCDQNTDLEYNCCDIPEETWTGRESDVAYASYIPGSIIWAKQYGYPWWPGMVESDPDLGEYFLFASHLDSLPSKYHVTFFGETVSRAWIPVNMLKNFQELSLELARVKCRNKDCSNKLKAALIM…
Pteropus vampyrus	Placental	MMTALQSKEEYGKGSKKSFAPPAQKLHSLIPDSLNSPKEETLGISSLETEARPNLLKARLKKKEKATTENGSSNGQEKKVKAQDNKQKEKKEKEKSSLTNAEFEEIIQIVLQKSLQQSLGMESSLGFPETSCAQPIRYTQFDKEPGITSSTTDNDNTDGERVMVPHILEISASQEGGVIPEIKMSKPGQPDPAPSEKKFNRLSLSKRKKEAHEKMKKAQSEHKHRQKDQPKKMVQDHSQFMDQQKREESGFGQCLVWVQCSFPNCEKWRRLRGNIDPSVLPDNWSCDQNTDLEYNCCDIPEETWTGRESDVAYASYIPGSIIWAKQYGYPWWPGMVESDPDLGEYFLFASHLDSLPSKYHVTFFGETVSRAWIPVNMLKNFQELSLELARVKCRNKDCS…
Pygocentrus nattereri	Bony fish	MNKAREEDKPARDGGEKRGATVEPGEGTERTGASEKKQKPKKRVKEEEKDREYGAVAGMKRPKREKTGGDGDGQTAEEKLMKNSKEEGMRDDKAQWPAVSKYEILEAMLESSISTLIKDTTAMLTEVESMQASIDGKTCRAEQEKEKDEVKECSPGPSSLDKDSMRETKNKPDSKAEDREEESSSDSDKYVVWVQCSRADCFKWRKLSEDVDPSVLPDDWICEDNPDPAFCSCSVPEEQSSSCEEEVFFCSLVPGSLVWAWQSGHPWWPAMIERDPDTYDYLEFHRKTDLAPFKCHVTYFGDPVCIDWVFCSDVRSYADLTEDEAFSMLEQPELKKKLKDAICMFKQALKLSPQMRLMEFGFWSRYESDRASSEEDSDVGEVLELFSGKSGKYSDDENL…
Rattus norvegicus	Placental	MAALQSHREYEKGTKKTFAPPTQKSHIEKPRPNSWKEDTPGTSSLEAETKPSLLKASLKKKQKATTEHGPSRGQEKKQKAHDQPAEKKGKEKTLTSAEFEEIFQIVLQKSLQECLETSCIQRIRPTKSDKEPGIAPSATDKENADPEKVITPDTPDIASSVEEGVNSEMGTSSLCQPGTEPSKKKWDRRSLSKQKKKAEDEKMEKIQDERECTLKEKQKIMIRDQKEEEGSFGHCVIWVQCSSPKCEKWRQLRGDIDPSVLPDDWSCDQNPDLNYNRCDIPEESWTGCESDVAYASYVPGSIVWAKQYGYPWWPGMIECDPDLGEYVLFASHLDSLPSKYHVTFFGEAVSRAWIPVRMLKNFQELSSELARLLSKLGTSVKKCKNKDSTQKLEAAISMA…
Rhincodon typus	Cartilaginous fish	NYVAWVQCSEEKCGKWRRLDDSVDPATLPDDWVCSQNPDPLYNMCDLPEEVWDGRENDIIYAELVPGSIVWAKQLGYPWWPGMVEHDPQTGKYFMFTTDSDQFPSKYHITFFDTTVSHAWIPVPLIKGFQEIPQERNMAKRDFSKRVNTAKKMAEEAQKVKIQDRISQFGFLVRYKGIEDAKLSEDSPSQESLEDPCIVEDAKRPKSRNKEESWRLSEKEPETHQLRARKGKEKN
Rhinolophus sinicus	Placental	MMTTLQSKEEYGKGPKKAFAPPTQKLHSLTPCSPNSPKEETLGISSPEAQARPNLPKAKLEKKKAKATTKNGPSSGQEKKVKAQDNKQAKKKKKEKSSLTNAEFEEIVQLVLQKSLQQSLETSCAKPLRCTQLDKEPGIASSTTDNDNADGERVIVPHILEISASQEDGIIPEIKTSKPGQPDPVPRKKKFNRLSLSKRKKEAKDEKMQKSQSGYEHRQKYQPKKMVQVHSQTIDQQKGEESGFVSFPVTGQCLVWVQCSFPNCGKWRRLRGNIDPSVLPENWSCNQNTDLDYNRCDIPEETWAGRESDVAYASYIPGSIIWAKQYGYPWWPGMVESDPDLGEYFLFASHLDSLPSKYHVTFFGETASRAWIPVNMLKNFQELSLELAGVRKYKNKDCS…
Rhinopithecus bieti	Placental	MMTTLQNKEECGKGPKRIFAPPAQKSYSLLPCSPNSPKEETLGISSPETEASISLPKASLKKEEEKATTKNGPSRGQEKKRKAQNNKQAEKKEKEKSSLTPAEFEEIVQIVLQKSLQECLGMGSGLDFAETSCAQPIVSTQSAKEPGITASATDTDNANGEEVPHTQEISVYWEGEAAPEIRMSKLGQPDPVPSKKKSNRLTLSKMKKEAHEKVEKTQGGHEHRQEDQLKETVQAHSQIRDLQKGEISGFGQCLVWVQCSFPNCGKWRRLCGNIDPSVLPDNWSCDQNTDVQYNRCDIPEETWRGLESDVAYASYIPGSIIWAKQYGYPWWPGMIESDPDLGEYFLFTSHLDSLPSKYHVTFFGETVSRAWIPVNMLKNFQELSLELSGMKKRRNDCSQ…
Rhinopithecus roxellana	Placental	MMTTLQNKEECGKGPKRIFAPPAQKSYSLLPCSPNSPKEETLGISSPETEASISLPKPSLKKEEEKATTKNGPSRGQEKKRKAQNNKQAEKKEKEKSSLTPAEFEEIVQIVLQKSLQECLGMGSGLDFAETSCAQPIVSTQSAKEPGITASATDTDNANGEEVPHTQEISVSWEGEAAPEIRMSKLGQPDPVPSKKKSNRLTLSKMKKEAHEKVEKTQGGHEHRQEDQLKETVQAHSQIRDLQKGEISGFGQCLVWVQCSFPNCGKWRRLCGNIDPSVLPDNWSCDQNTDVQYNRCDIPEETWRGLESDVAYASYIPGSIIWAKQYGYPWWPGMIESDPDLGEYFLFTSHLDSLPSKYHVTFFGETVSRAWIPVNMLKNFQELSLELSGMKKRRNDCSQ…
Rousettus aegyptiacus	Placental	MASQWACLAVSVLDGMFHKFHLMIKFLSEYGKGSKKTFAPPAQKLHSLIPYSLNSPKEETPGISSLETEARPNLLKARLKKKEKATTENGSSSGQEKKVKAQDNKQMEKKEKEKSSLTNAEFEEIIQIVLQKSLQQSLGMESSLDFPETSCAQPIRYTQFDKEPEITSSTTDNDNIDGERVMVPHILEISASQEGGVIPEIKMSKPGQPDPAPSGKKFNRLSLSKRKKEAHKKMKKAQSEHKRRQKDQPKKMVQDYSQLVFMDQQKREESGFGQCLVWVQCSFPNCEKWRRLRGNIDPSVLPDNWSCDQNTDLEYNCCDIPEETWTGRESDVAYASYIPGSIIWAKQYGYPWWPGMVESDPDLGEYFLFASHLDSLPSKYHVTFFGETASRAWIPVNML…
Saimiri boliviensis	Placental	MMTTLQNKECGKGPKRIFAPPAQKSYNLIPFSPNSPKKETLGISSPKTEARISLPKARLKKEEKATTNNASSRGQEKKRKAQNNKQAEKKEKEKSSLTNAEFEEIVQIVLQKSLQECLGMGSGLDFAETSCAQPIVSTHSDKEPGITASATDTDNADGEEVPHTQEISVSWEGEAVPEIRTSKLGQPDPAPSEKKSSRLSLSKRKKEAGHEKVEKTQSGHELRQKDQLKKTVQDHSQIRDQQKGEISGFDQCLVWVQCSFPNCGKWRRLCGNVDPSVLPDNWSCDQNTDMEYNRCDIPEETWTGLESDVAYASYVPGSIIWAKQYGYPWWPGMIESDPDLGEYFLFTSHLDSLPSKYHVTFFGETVSRAWIPVNMLKNFQELSLEPSGMKKHRNKDCSQ…
Salmo salar	Bony fish	HYHEDEEHINQCSKRVKLSLSSLQVLRLTDSQCDHIFDSATALETPVDHCLEDARDVLSEVELLQATIDQVSLREEEEPRRRESSERKTPASGSHTQRKRQRKREEEEDSDSSAEFDQWVQCSRSVCGKWRRVERQVDLAALPSDWTCTHDTGPGLCEAAEDSWSGEECDVINSSLVPGSLVWAQQIGYPWWPAIVERDPDTKTFCQFNRNTDLYPCRYHVTYLGEPASRAWVCRSKVRNYTELTEDAAITGKSLQRFKKKLREAVRIATQAQSIPLKRRLSRFGFWIQQTSDRESSEDSDIAGATVVEVMEMLLDHEKSRRSAYIRNKSAVVKAAKRQSDREQSEPIGGDLNEGGKGVKEKVGKKKRGEEEGKKRVTSPWFSKLKKGSATTARPAPPP…
Sarcophilus harrisii	Marsupial	MSHTKIFPHEDEKTELAKRARKHRRKGQPRKIVQGYTQISDQEEAGGEKTSNFSQCIAWVQCSFPSCAKWRRLLGNTDPSVLPDDWSCSQNTDLQFNHCDIPEENWSGCETDVVYASYIPGSIIWAKQYGYPWWPGMVESDPDLGEYFLFASQQDVLPSKYHVTFFGDTASRAWIPSNMLKNFRELSLEQVEPVRSSQELRKRIRNKDCSQKLMAALVMAQDAQRISIQDRLSLFGFHIRYKEDAAESGSSEEGRDLFFQEAKKPHRAGNSNSYISKEENKESCSTKCNLGCTSKKKLKLKGVGDMTDEQDETPKRKKNKFPSQDSTSVEEKGSSGNSHPDQSGLNKKFTAPQRKTTVTKLPGNRGKSAFQNQFPPTPSQALPLVEAGKKSDPQWSLIL…
Sus scrofa	Placental	MMTTLQNKEGCGKGAKKTFAPPAQKFRSLMPYSLNSAKEEILEISPPGAEAPPSLQKAGLEKKEKVTTEDGPDSGQEIKGKAQDNKKAEKKEKEKSSLTNAEFEEIVQIVLQKSLQECLGMESSLDFAETSSAQPTRCTQLDKEPGITSTTDNENADGERVVVPHNLEISASQEDGIIPEIKTSKPGQPDPAPSEKKFSRLSLSKREKKAHLKMEKTQSGYEHRQKDQLKKVVQDHSQFRDQQKGEGSGFDQCLVWVQCSSPNCEKWRRLRGNIDPSVLPDNWSCDQNTDAEYNRCDIPEETWTGHESDVAYASYIPGSIIWAKQYGYPWWPGMVESDPDLGEYFLFASHLDSLPSKYHVTFFGETVSRAWIPVNMLKNFQELSPELAGVKKCRNKDCS…
Terrapene carolina	Turtle	MMKKTFAPPLAKPHVLSLREGPEHHGKKEDARAKEAITYPLSQGSSDSIETKRKEGHPDTDVQRWKKSRVAKEEDTGHVKGPATLRDVEKRPKRNSSNASAKEMCHLTDLQFEEIVQSVLQKSLQECMEQSKRTFHQAEATEAAEPQGLKKETFETSLPAGNLVQHSDEPKGTASAVDLKEPLPKAKKRNKLSLNKMRKEMPDGSTEANKERHKRHRKGEPKKIVQGYTLIADQAETEEGGESTFNQCVAWVQCSYPSCEKWRRLSSDTDPSVLPEDWTCSQNTDLQYKSCDVPEEMWSGSENEVVYATYVPGSIIWAKQFGYPWWPAMVECDPDIGEYFLFSSRLDSLPSKYHVTFFGESVSRAWISATMLRNFHVFSTESLGLVNSGFPQGSALGPV…
Thamnophis sirtalis	Squamata	MRTISSDLLPRGRNLLIATSLTGGRPAPIPAKGGFLPRVEQLPGTSISFRIMADPFPDPLLALGCCTAWVQCSYPSCEKWRRLSSDVDPSALPEDWSCSQNPDLQYNSCSVPEETWSGAEDEVVYAVYFPGTIVWAKQYGYPWWPGIIEADPDIGEYFLFSSQADSLPSKYHVTFFGHSVTRAWISASLLKNYGEPPAEGNAGAKLRSRSEKQNLKAALEMAKEAEEISIQERIRRFGFHSRFKHKESPKGGNILKEQNNVASRPPVKGTPGTKAGNKNTTTSGKDPGKLLREISGVKPNASIKTTIGVTKGDKTFESGGLENASPALKKSRPERTAPKAAATLRGSERAAGKQEGSQKGSKRPFALPPCQPPQARHPLRPSGPGSRPADFARSPPPPS…
Trichechus manatus	Placental	MTTLQNKEECRKGPKKSFAPPAQKLHRLMPSSRNSLKEDTLRINSPELEAKPSLPKARLEKKNEKATTENGQGSGQEKKGKDLYNKQAEKKAEKEGASLTNAEFEEIVQIVLRKSLQECLGVGSGLGLAEMSCAQPIACTQSDKEPELTSMTVDNDNADGLIVPHTPEISASQENEVVPEINASKPGQPDPASSEKKFNKLSLNKRKMEAQNEKLEKLQGKHEHRQKDQPKKTARNHSQIRDQQKGEGGGFGQCLVWVQCSSPNCEKWRRLHGNIDPSVLPENWSCDQNTDLEYNRCDIPEETWTGHESDVAYASYIPGSIIWAKQYGYPWWPGMVESDPDLGEYFLFASHLDSLPSKYHVTFFGETVSRAWIPVNMLKNFQELSLELAGAKKCRNKDC…
Tupaia chinensis	Placental	MMTTLQNKECGKGSKKTFAPPAQKKHSLVLCSPNAAKEETLGISFPGTEGRLEKKDKATTENGPSNDQEKKGKTEDNKQAQKKEKEKSSLTNAEFEEIVQIVLQKSLQECLGMGSSLDFVETSYAQPVTHTPSDKQPGITSATDKDNADEERIMVHNSPEILVSQEDKVVSEIKTSKPGQPDPTAVVKKFNRLSLSKRNKEAQNEKMEKAQGGHEHKQKDQSKKMVHSHSQIRHQQKGKKSGFGLYQVWVQCSFPNCEKWRRLPGNIDPSVLPNNWSCDQNTDLEYNHCDIPEETWIGHESDVAYASYVPGSIIWAKQYGYPWWPGIIESDPDLGEYFLFASHLDSLPSKYHVTFFGETVSRAWIPVTMLKNFQELSLELARVKKYRNKECCHKLGAAL…
Tursiops truncatus	Placental	MMTTLQSKECGKGPKKTFAPPAQKLHSLMPYNLNSSKEEILGISSPEAETRPSLLKARLEKKKEKTTKENGTSSGQEIKGKAQDSKKAEKKEKGKSTLTNAEFEEIVQIVLQKSLQECLGMESSLDFAETSCAQPTRCTQLDKEPGIASSTTDNNSADGERVVVPHILEISASQEGGVIPEIKTSKPGQPDPAPSEKKFNKLSLSKRKKAAQNEKMEKAQSGHEHRQKDQLKKTVQDHSQIRDQQKGEGSGFGQCLVWVQCSSPNCEKWRRLRGNIDPSVLPDNWSCDQNTDLEYNHCDIPEETWTGHENEVAYASYIPGSIIWAKQYGYPWWPGMVESDPDLGEYFLFASHLDSLPSKYHVTFFGETVSRAWIPVNMLKNFQELSLELAAVKKCKNKD…
Ursus maritimus	Placental	MMTTLQSKEECGKGPKKTFAPPAQKLHSLMCYSPDPPKEETLGISSPKARLEKKEEKATTENGPSSGQENKGKPQDKQAEKKEKEISSLTNAEFEEIVQIVLRKSLQECLEMGSSLDFAETSCAQPVRCTQLDKDPGIASSTDNGNADGVMVPHILEISATQEAGVTSVIKTSKPGQPDPAPSEKKFNRSSLSKGKKGSQDEKMEKAPSGHEQKQKDQLKKPVQDDSQTRNQEKGEGGGFGQCLVWVQCSSPDCEKWRRLCGNIDPSVLPANWSCDQNTDSRYNRCDIPEESWTGLESDVAYASYIPGSIIWAKQYGYPWWPGMVESDPDLGEYFLFASHLDSLPSKYHVTFFGETVSRAWIPVNMLKNFQELSLELAGGKKFRNKDCNQKLGAALTMA…
Vicugna pacos	Placental	MMTTLQSKEECGKGPKKTFAPPAQKLHSLMPCSLNSSKEEILGISSPEARPSLLQARLEKKEEKATTENGPGGGQEIKRKAQNNKKAEKKEKEKSSLTDAEFEEIVQIVLRKSLQECLETSCAQPTRCTQLDKEPGISSSVTDNDSADGERVVVPHILEISASKEGGVIPEIKTSKPGHPDPASSEKKFGRFSLSKRKKEAQYEKMEEAQSGHEHRQKDQLKKIVQGHSQIRDQQKREGSGFGQCLVWVQCSSPNCEKWRRLRGNIDPSVLPDNWSCDQNTDLEYNRCDIPEETWIGRESDVAYASYIPGSIIWAKQYGYPWWPGMVESDPDLGEYFLFASHLDSLPSKYHVTFFGETVSRAWIPVNMLKNFQELSLELAGLKKCRNKDCSQKLGAALM…
Xenopus laevis	Amphibians	MYQQKAKRRLCSALLLPNKSSLAGTPMLHHCAQEEISESRIGGKIPKLEKSEGVLSSDEYEDIFRAVLGRTGPASPQAHAGEVRPTLKGSITPLKQSHHQKNPAAPKAEPLDPVPIDPGKASLKGTWHRGACVAWVQCAKLNCKKWRRLGQDVDPLLLPEDWCCEQNSECQSCSCADPEEKCLEDEDIIYAAFIPGCVVWAKQFGYPWWPAMIDSDPDSASYFMFKHCTDPLPWKYHVTFLGDKVSRAWICMRHMKPFSDHSPESLGVYKEKNRELKKMLVNSIGMAHEVLSLGIQERLNTFGFCGRSGLYI

## Sheet: Accessions of BLAST orthologs
Novel Zcwpw1 orthologs identified using BLAST search in nucleotide (nt) and protein (nr) databases. Only hits: (1) with both zf-CW and PWWP domains present, supported by either PrositeScan or NCBI conserved domains search (CD) and (2) cluster with ZCWPW1 orthologs, are reported here. nt_mRNA: BLAST hit is mRNA, nt_genome: BLAST hit is genomic DNA. For genomic DNA (nt_genome) hits, the sequence re…
Accession	Evidence	db	Species	Sequence	Notes
GCC21175	Prosite	nr	Chiloscyllium punctatum	masctvtiqrihvrqltvladglkrkrskasgtqqsrnlslfadtpcsdyrlesvffcggmhdstcvlltavrtlgrpvvnkyfvfalndsvcqrekdkyvawvqcskekcgkwrrlednvdpatlpddwvcsqnpdplynmcdlpeevwdgrendiiyaelvpgsivwakqfgypwwpgmvehdpqtgkyfmfttnsdqfpskynitffdttvshawipvpliksfqeipqernmakrdfskrvnsakkmaeeaqkdrisqfgfivrykgiegaklsedsssqesledpcivkdakrpasrykeetrskdcakkepenhqltvrkgkgkngiiyidiftvygkt
KAB0347684	Prosite	nr	Muntiacus muntjak	mmptleskekcgkgqkntfappaqklhslmlsnlnsskeeileisspqaevrpsllkaglekkkekattengpvsgqeikgkaqdskkakkekekstltsaefeeivqivlrksfqecletsctqptrctqlgkepgiassntsdnnnadgdrvvvppileisafqedgiipeikiskpgqpdsassekkfnkfslskrkkeaqdekmetdqsghehrqddqqketiqdhsqnrdqqkgegsgfgffavtgqclvwvqcsspncekwrrlhgnidpsilpdnwscdqntdlrynrcdipeetwtghesdvayasyipgsiiwakqygypwwpgmvepdpdlgeyflfashldslpskyhvtffgetvsrawipvnmlknfqemslelselrkcknkdci…
KAB0384109	Prosite	nr	Muntiacus reevesi	mmptleskekcgkghkntfappaqklhslmlsnlnsskeeileisspqaevrpsllkaglekkkekattengpvsgqeikgkaqdskkakkekekstltsaefeeivqivlrksfqecletsctqptrctqlgkepgiassntsdnnnadgdrvvvppileisafqedgiipeikiskpgqpdsassekkfnkfslskrkkeaqdekmetdqsghehrqddqqketiqdhsqnrdqqkgegsgfgffavtgqclvwvqcsspncekwrrlhgnidpsilpdnwscdqntdlqynrcdipeetwtghesdvayasyipgsiiwakqygypwwpgmvepdpdlgeyflfashldslpskyhvtffgetvsrawipvnmlknfqemslelselrkcknkdci…
OWK11297	Prosite	nr	Cervus elaphus	mfhklhlmtkflsecgkgqkntfappaqklhslmpynlnsskeeileisspqaevrpsllkaglekkkektttengpvsgqeikgkaqnskkakkekekstltsaefeeivqivlrksfqeclvlwyrkslkptrctqldkepriassntsdnnnadgdrvvvppileisasqedgiipeikiskpgqpdsassekkfskfslsrrkkeaqdekmetdqsghehrqdnqqketiqdhsqnrdqqkgegsgfgqclvwvqcsspncekwrrlhgnidpsilpdnwscdqntdfhfmrlflslhssslladlqynrcdipeetwtghesdvayasyipgsiiwakqygypwwpgmvepdpdlgeyflfashldslpskyhvtffgetvsrawipvsmlknf…
CP011909	CD	nt_genome	Geotrypetes seraphini		36062636_GQCLVWVQCSSPHCEKWRRLRGNIDPSVLPDNWSCDQN_36062749__36064434_WPGMVEPDPDLGEYFLFASHLDSLPVSF_36064517
LR738420	CD	nt_genome	Geotrypetes seraphini		33174940_GQCLVWVQCSSPNCEKWRRLCGNIDPSVLPDNWSCDQN_33175053__33177295_SKYHVTFFGETVSRAWIPVNMLKNFQEL_33177378
VFV18726	Prosite	nr	Lynx pardinus	mvphileisatkeagvtsvietskpgqpdpppsekkfnrfslskgkkgarqclvwvqcsspncekwrrlcgnidpsvlpdnwscdqntdlkynrcdipeeswighesdvayasyipgsiiwakqygypwwpgmvesdpdlgeyflfashldslpskyhvtffgetvsrawipvnmlknfqelslelagvkrcrnkdcsqklgvaltmaqeaeqisiqervnlfgfrsryngsdnsregkditvtganspdsrlekegeeavleeveeeeeeekdstlpspkpakiqtknpkargiadgrdgilqskttkrslgnesaatpvrimgrkeghrnsepdqpgpkkkfkapqskaagtnfpedkearmepkglpppahlgacpmvgkegskcpqeagsvlhdd…
XM_031028579	Prosite	nt_mRNA	Leptonychotes weddellii	MVESDPDLGEYFLFASHLDSLPSKYHVTFFGETVSRAWIPVNMLKNFQELSLELAGVKKCRNKDCNQKLGAALMMAQEAEQISIQERVNLFGFRSRYNGSDSSGEGKDLSLSGANSPDSCMEKEEEESELEAEELEEEEEKKYKSFISYSSSEFLCTR
KAF0882919	Prosite	nr	Crocuta crocuta	fhlmikflsehgkgskktfappaqkmhslmcyspnshkeetleissskarlekkeekattengpssgkkkkgkaqdkqaekkekeklsltnaefeeivqivlrksfqeclgmaykmgsildfseascaqpirrtqlekepgiapstdndnadgekvmvphileisatkeagvtsviktskpgqpdpalsedkfnrfslskgkkrayekmekpqsgydprqkaqlkktvqnhsrirnqqkgegsgfgqclvwvqcsspncekwrrlcgnidpsmlpdnwscdqntdfkynrcdipeeswtgcesdvayasyipgsiiwakqygypwwpgmvesdpdlgeyflfashldslpskyhvtffgetvsrawipvnmlknfqelslelagvkkcrnkdcsqklga…
MBV94899	Prosite	nr	Eschrichtius robustus	mgskddadptfwrgvcekdrlflegfsgqclvwvqcsspncekwrrlrgnidpsvlpdnwscdqntdleynhcdipeetwtghesevayasyipgsiiwakqygypwwpgmvesdpdlgeyflfashldslpskyhvtffgetvsrawipvnmlknfqelslelagvkkcrskdcsqklgaalmmaqeaeqisiqervnlfgfwsrysgsdnsgegkdvmlsgansldsclekeeeeseleeeseleeeeeeqqkk
TEA41230	Prosite	nr	Sousa chinensis	fhlmikflsecgkgpkktfappaqklhslmpynlnsskeeilgisspeaetrpsllkarlekkkekttkengtssgqeikgkaqdskkaekkekgkstltnaefeeivqivlqkslqeclgmessldfaetscaqptrctqldkepgiassttdnnsadgvvvphileisasqeggvipeikiskpgqpdpapsekkfnklslskrkkaaqnekmekaqsghehrqkdqlkktvqdhsqirdqqkgegsgfgqclvwvqcsspncekwrrlrgnidpsvlpdnwscdqntdleynhcdipeetwtghenevayasyipgsiiwakqygypwwpgmvesdpdlgeyflfashldslpskyhvtffgetvsrawipvnmlknfqelslelaavkkcknkdf…
KAB0398199	Prosite	nr	Balaenoptera physalus	mpcnlnsskeeilgisspeaetrpsllkarlekkkekttkengtgsgqeikgraqdnkkaekkekgkstltnaefeeivqivlqkslqeclgmafrmessldfaetscaqptrctqldkepgiassttdnnnadgervvvphileisasqeggvipeiktskpgqpdpapsekkfnklslskrkkaaqdekmekaqsghehkqkdqlkktvqdhsqirdqqkgegsgfgefshgqclvwvqcssancekwrrlrgnidpsvlpdnwscdqntdleynhcdipeetwtghesevayasyipgsiiwakqygypwwpgmvesdpdlgeyflfashldslprakarrrtrgynrtifllqskyhvtffgetvsrawipvnmlknfqelslelagvkkcrskd…
LR738608	CD	nt_genome	Geotrypetes seraphini		7971486_GRCLVWVQCSSPNCEKWRRLRGNIDPSILPDNWSCEQN_7971599__7973741_LQSKYHVTFFGETVSRAWIPVNMLKNFQEL_7973830
LR738629	CD	nt_genome	Geotrypetes seraphini		32756424_GQCLVWVQCSSPNCEKWRRLRGNIDPSILPDNWSCEQN_32756537__32754212_LQSKYHVTFFGETVSRAWIPVNMLKNFQEL_32754301
VTJ84000	Prosite	nr	Marmota monax	mrphgpnshrdetlgisspvaeakasppkarlekeekattedgpgvgqekkgkaqdkpaekkekgkssltnaefeeivqivlqkslqeclgmgsglnfaetscvqtnsqsdkepgiasatdndnavgerkmiphtpetsasvedvpeirtsksaqlvpapsekkfnrlslskrkreaqdekmekvqgghecrekdqpekmiqgdsqirgqqkgeesgfgqclvwvqcsspncekwrrlrgnidpsilpdnwscdqntdldynrcdipeeiwtgresdvayasyvpgsiiwakqygypwwpgmvesdpdlgeyflfashldslpskyhvtffgetvsrawipvnmlknfqelslelagvkkcrnkdysqklvaaimmaqkaeqihigervnlfgfwsrys…
XP_024302586.1	CD	ncbi	Homo sapiens	mmttlqnkeecgkgpkrifappaqksysllpcspnspkeetpgisspetearislpkaslkkkeekatmknvpsreqekkrkaqinkqaekkekekssltnaefeeivqivlqkslqeclgmgsgldfaetscaqpvvstqsdkepgitasatdtdnangeevphtqeisvswegeaapeirtsklgqpdpapskkksnrltlskrkkeaqdekvektqgghehrqedrlkktvqdhsqirdqqkgeisgfgqclvwvqcsfpncgkwrrlcgnidpsvlpdnwscdqntdvqynrcdipeetwtglesdvayasyipgsiiwakqygypclstm
XP_024302585.1	CD	ncbi	Homo sapiens	mmttlqnkeecgkgpkrifappaqksysllpcspnspkeetpgisspetearislpkaslkkkeekatmknvpsreqekkrkaqinkqaekkekekssltnaefeeivqivlqkslqeclgmgsgldfaetscaqpvvstqsdkepgitasatdtdnangeevphtqeisvswegeaapeirtsklgqpdpapskkksnrltlskrkkeaqdekvektqgghehrqedrlkktvqdhsqirdqqkgeisgfgqclvwvqcsfpncgkwrrlcgnidpsvlpdnwscdqntadvqynrcdipeetwtglesdvayasyipgsiiwakqygypclstm
ENSCCNG00000018319	CD	ensembl	Castor canadensis	MMTTLQNKEECGKGPKKTFAPPIQKLHSMIRHAPDSPKEVTPGVNSPQAETRPNLPKARIEQKVTRENGPSSGQETKGKAQDNKPAGKKVKEKSSLTNAEFEEIVQIVLQKSLQECLEVSCAQCIVCTQLNKQRGIASSATKNMDGERVMVSHAPETSAAVEDEVVPEIRTSKPSQPIPAPSEKKLTKLPLSKRKKRAQDEKIGKIQGGHEHRQKDQLKQMIQNHFYIRDQKKGEESGFGQFLVWVQCSFSNCEKWRRLPGNIDPSVLPDNWSCDQNPDLNYNRCDIPEEAWTGRESDVIYASYIPGSIIWAKQYGYPMEVGSSKYHVTFFGETVSRAWIPVNMLKNFQELSQELAGVKKCRNKDYSQKLGAAIVMAQEAEKVNIQERVNLFGFWSRYS…
OBS59843	Prosite	nr	Neotoma lepida	cekgskktfapptqkshsvkpqpklwkedtlgtsspeaeakprrskasskkkeqktttehgpsggqekkrkaqdkpaekkgkekstltnaefeeifqsvlqkslqecletscvqpvmpiksdkepgiapsatdnenadgdgifsgrekdekiqdgrecslkdrqktmiqdhsqirgqqkeeeggfgqcliwvqcsspkcekwrqlrgdidpsvlpdnwscdqnpdlnynrcdipeetwtgcesdvayasyvpgsiiwakqygypwwpgmiesdpdlgeyflfgshldslpkkcrnkdysqkleaairmahkaeqiniqgqervnlfgfwsrysrsdgsgegkglmlcesnspesclekekxseeeeeekeekkdptlprpxpakiqtpktksrgptggr…
XM_007955885	CD	nt_mRNA	Orycteropus afer	MMATLQNKEEYGKGPKKTFAPPVQKLHRLMPLSPNSLKEDTREISSPEAEATASLPKARLEKKNEKAHTENGPGSGQEERGKNLCNKQAEGKVEKERTSLTNAEFEEIVQIVLQKSLQECLGIGSDLGFAETSCVRPIGYTQSGKERGIASITAASDSADGSGKIPISIGKKTNQFVVWVQCSSPNCEKWRRLHGNIDPSTLPDNWSCAQNIVDREGYGVYEEKKIREIQWPGMVESDPDLGEYFLFASHLDSLPKKYKNKDCIQKLEAALKMAQEAEQVNIQAPMNVIDQISGMIGRVERRINKNLMLSGPNSSNSRFEKEEEVESEMEEEEEKKIEGPGPREPLCWEAGGAAPEDEASSDLDLEQLLEDVGEEPEPREESLRRDAGEDVTMALLEE
XP_007954076	CD	nr	Orycteropus afer	mmatlqnkeeygkgpkktfappvqklhrlmplspnslkedtreisspeaeataslpkarlekknekahtengpgsgqeergknlcnkqaegkvekertsltnaefeeivqivlqkslqeclgigsdlgfaetscvrpigytqsgkergiasitaasdsadgsgkipisigkktnqfvvwvqcsspncekwrrlhgnidpstlpdnwscaqnivdregygvyeekkireiqwpgmvesdpdlgeyflfashldslpkkyknkdciqkleaalkmaqeaeqvniqapmnvidqisgmigrverrinknlmlsgpnssnsrfekeeevesemeeeeekkiegpgpreplcweaggaapedeassdldleqlledvgeepepreeslrrdagedvtmallee
placentals_Zcwpw1_1230840	CD	orthodb	Orycteropus afer	MMATLQNKEEYGKGPKKTFAPPVQKLHRLMPLSPNSLKEDTREISSPEAEATASLPKARLEKKNEKAHTENGPGSGQEERGKNLCNKQAEGKVEKERTSLTNAEFEEIVQIVLQKSLQECLGIGSDLGFAETSCVRPIGYTQSGKERGIASITAASDSADGSGKIPISIGKKTNQFVVWVQCSSPNCEKWRRLHGNIDPSTLPDNWSCAQNIVDREGYGVYEEKKIREIQWPGMVESDPDLGEYFLFASHLDSLPKKYKNKDCIQKLEAALKMAQEAEQVNIQAPMNVIDQISGMIGRVERRINKNLMLSGPNSSNSRFEKEEEVESEMEEEEEKKIEGPGPREPLCWEAGGAAPEDEASSDLDLEQLLEDVGEEPEPREESLRRDAGEDVTMALLEE
XP_007954076.1	CD	ncbi	Orycteropus afer	mmatlqnkeeygkgpkktfappvqklhrlmplspnslkedtreisspeaeataslpkarlekknekahtengpgsgqeergknlcnkqaegkvekertsltnaefeeivqivlqkslqeclgigsdlgfaetscvrpigytqsgkergiasitaasdsadgsgkipisigkktnqfvvwvqcsspncekwrrlhgnidpstlpdnwscaqnivdregygvyeekkireiqwpgmvesdpdlgeyflfashldslpkkyknkdciqkleaalkmaqeaeqvniqapmnvidqisgmigrverrinknlmlsgpnssnsrfekeeevesemeeeeekkiegpgpreplcweaggaapedeassdldleqlledvgeepepreeslrrdagedvtmallee
gray_short-tailed_opossum_Zcwpw1_13616	CD	orthodb	Monodelphis domestica	MHANQVRGRLPKPQGLTLAMVTSPLGGQRALRRALPLRRAPTLFKQREKPASKLNDDDLKEQGKLLETPYPPITLASKEEGIVPGTQSSKSDILPSEKKQNTLPLSNKKKEENKEKTKLTQESCKHRRKGQSRKIVQGYTQISDQEESGGEWAGNFGIAWVQCSFPSCEKWRQLHGNINSSSILPDNWSCSQNTGGQLDPDLGEYFLFTSQQDVLPAKYHVTFFGNSVSRAWISSNMLKNFQELSLEQVERDQVSLFGFSSRCKENASEPDSSEEEGDIFFKETKKTQSTGSSNSGFSKEESKVTHLSSQILFLSVAQPWWQPSLVLRLSMLPSGFGISFGQVTPFKMPFSSSKKQRSLPLKG
XP_007483373.1	CD	ncbi	Monodelphis domestica	mhanqvrgrlpkpqgltlamvtsplggqralrralplrraptlfkqrekpasklndddlkeqgklletpyppitlaskeegivpgtqssksdilpsekkqntlplsnkkkeenkektkltqesckhrrkgqsrkivqgytqisdqeesggewagnfgiawvqcsfpscekwrqlhgninsssilpdnwscsqntggqldpdlgeyflftsqqdvlpakyhvtffgnsvsrawissnmlknfqelsleqverdqvslfgfssrckenasepdsseeegdiffketkktqstgssnsgfskeeskvthlssqilflsvaqpwwqpslvlrlsmlpsgfgisfgqvtpfkmpfssskkqrslplkg
XM_007483311	CD	nt_mRNA	Monodelphis domestica	MHANQVRGRLPKPQGLTLAMVTSPLGGQRALRRALPLRRAPTLFKQREKPASKLNDDDLKEQGKLLETPYPPITLASKEEGIVPGTQSSKSDILPSEKKQNTLPLSNKKKEENKEKTKLTQESCKHRRKGQSRKIVQGYTQISDQEESGGEWAGNFGIAWVQCSFPSCEKWRQLHGNINSSSILPDNWSCSQNTGGQLDPDLGEYFLFTSQQDVLPAKYHVTFFGNSVSRAWISSNMLKNFQELSLEQVERDQVSLFGFSSRCKENASEPDSSEEEGDIFFKETKKTQSTGSSNSGFSKEESKVTHLSSQILFLSVAQPWWQPSLVLRLSMLPSGFGISFGQVTPFKMPFSSSKKQRSLPLKG
XP_007483373	CD	nr	Monodelphis domestica	mhanqvrgrlpkpqgltlamvtsplggqralrralplrraptlfkqrekpasklndddlkeqgklletpyppitlaskeegivpgtqssksdilpsekkqntlplsnkkkeenkektkltqesckhrrkgqsrkivqgytqisdqeesggewagnfgiawvqcsfpscekwrqlhgninsssilpdnwscsqntggqldpdlgeyflftsqqdvlpakyhvtffgnsvsrawissnmlknfqelsleqverdqvslfgfssrckenasepdsseeegdiffketkktqstgssnsgfskeeskvthlssqilflsvaqpwwqpslvlrlsmlpsgfgisfgqvtpfkmpfssskkqrslplkg
ENSMODG00000046013	CD	ensembl	Monodelphis domestica	MGGYHRLLLSVNFLKNCISRKLLETPYPPITLASKEEGIVPGTQSSKSDILPSEKKQNTLPLSNKKKEENKEKTKLTQESCKHRRKGQSRKIVQGYTQISDQEESGGEWAGNFGIAWVQCSFPSCEKWRQLHGNINSSSILPDNWSCSQNTGGQLDPDLGEYFLFTSQQDVLPAKYHVTFFGNSVSRAWISSNMLKNFQELSLEQVERDQVSLFGFSSRCKENASEPDSSEEEGDIFFKETKKTQSTGSSNSGFSKEESKVRSQGFLIVQFWG
LR699161	CD	nt_genome	Geotrypetes seraphini		31307533_QCIVWVQCSLENCQKWRRLESNIDPSSLPENWSCSEN_31307643__31329904_SKYHITFLGDCVSRAWISTSMLKNFKEL_31329987
ETE59233	Prosite	nr	Ophiophagus hannah	mkeveetgcctawvqcsypscekwrrlssdvdpsaxlssdvdpsalpedwscsqnpgsivwakqygypwwpgiieadpdigeyflfssqadslpvkycvvhlpltflctrmwsrviinlageefsrskyhvtffghsvtrawisasllknygeppgegnalvrgalpegsfakqntkpivdmcavasqptarsdrvvpflepllsrprir
GCF55667	Prosite	nr	Paroedura picta	lvgrgaeevggggkgagivtpgllmasapvrvgqetntskthssvmasqnnnnevrkvskklftpplanpriafakgepvhhrkqedgqadhvplncpagngsaskpmkahypkanpkgqekkqkgstkeddclsdslfeeivesvlkksleecmedfkkiapsaeeqglgretveaspppketvpgkasrdesevmlveagqqeprlekrrhgkpsvkdknenpeadnggrkekrkgapkkkvqgnaqiadqeekqkegeeeeaadegswcvawvqcsypacgkwrrlcsdvdpsvlpdnwscsenpdlqynscgipeetwlgsesevvyaiyipgsivwakqygypwwpgmieadpdigeyflfssrtdslpskyhvtffgdsvsrawisasmlrnf…
TFJ98473	Prosite	nr	Platysternon megacephalum	mkdqcvawvqcsypscekwrrlssdtdpsvlpedwtcsqntdlhyrscdvpeetwsgsenevvyatyvpgsiiwakqfgypwwpamvecdpdigeyflfssrldslpktlrskdyrqkldaavrmakeakrisiqervmrfgfisrsgeeglleahedseelfnvacepreekqpcdgnenmvatsdfkektflkglkkkftvpgsnssgssqpkppaggnrvnltpsrrdglkpelvkmlqvkdnttrshsrsssndeifeefqevgelekakearesqeaeknesseecslvlfee
XM_030774954	Prosite	nt_mRNA	Chanos chanos	MFAPPVTRPCHAEVQKFTLGQGGEKTKLTESEEGREEVFKPAKVGKSVDDVLWVQCSRAVCGKWRQLKDNEDPSALHLDWTCDKNTDPEYSSCSAPEERYCTSLEETFFCKLVPGSLVWAQQNGYPWWPAMVERDPDSNEYLLFKKETDQTPYKCHVTYLGTPVSRAWVLYNRVKDYAGLTEETLLNTVKQERLKKSLKESICMARQAVELSLKRRLARFGFWARHVSDRESSDEDSSIAAEENEDQTVPESIVEMSPDLTPASRDEDGESVEKKIRRGQDGGQPGEGKSADRCAFVYTADYEPASPLKNELCDYPLSPLPSVQSRYGYSAGRIVLPVKSRNHHCDEELLIHSATQGRARIRMV
XP_030630814	Prosite	nr	Chanos chanos	mfappvtrpchaevqkftlgqggektklteseegreevfkpakvgksvddvlwvqcsravcgkwrqlkdnedpsalhldwtcdkntdpeysscsapeeryctsleetffcklvpgslvwaqqngypwwpamverdpdsneyllfkketdqtpykchvtylgtpvsrawvlynrvkdyaglteetllntvkqerlkkslkesicmarqavelslkrrlarfgfwarhvsdressdedssiaaeenedqtvpesivemspdltpasrdedgesvekkirrgqdggqpgegksadrcafvytadyepasplknelcdyplsplpsvqsrygysagrivlpvksrnhhcdeellihsatqgrarirmv
XM_027162457	Prosite	nt_mRNA	Tachysurus fulvidraco	MAPRPSSGELWGLHLMPPRILVDCCLPNGMLVSLECLREAPLISIKQQLFTEARKYPLYHLLQEESCYIFVGVTQEAEREEFYDETRRLCDLRLFHPILKVIEPLGNREEKILNREIGFAIGMPICEFELVKDSEVQDFRRSILSVCREAMEEREGGGPHTHALYVYPPSVESSPQLPQHIYAKLDKGRLIVTIWVVVSPSNAKQKYTLKIAHDCVPEQLIAEAIRKKTRSMHLSAQQLRLCVQEYQGQYILKVCGCDEYLLEKYPLSQYKYIRSCIIVGKLPHLMLVSKDSVYDQLPCSGFVTPSYSRRTPQPSPSPGGGDPTNPRSLWTFNAHTPLRIRLICATYVNVNIRDIDKIYVRTGIYHGGEPLCDNVNTQRVPCSNPRWNEWLMYDITLTD…
XM_030337508	Prosite	nt_mRNA	Gadus morhua	MDKTSKKGKEKARFIPLFQTGESKPNPISKKKSQHLDGEQKRLPDPISRKKSQPLDGEQKRLPNPISKKKSRPLDGEQKRLPNPISKKKSRPLDGEQKRLPNPIPAEKSRPLGKGREEDTAAGQEKAEETEHTQGDKMKKTREKSQIPAEEGIDEFEEVFARVLDDASPVLKEELQTTVQRRTPSYFQRKLHDEQKDKDEEYYDQWVQCSDCDKWRRLKSGSEPSDLLGAWTCPLNTDEQYSSCSVSEEGSGDDDDDNISTSLRPGCLVWAQQTGYPWWPAMVERDPDTHQYCCFTHRTDTNPSRYHVTYLGQPVSRAWLSSGRIKPYSSLTLERAINMPSQKRHMEKLKKAVAMAARVQKETLITRIDMFGFLGRFVSDRESSEGSDLEEAAYDILDS…
XP_030193370	Prosite	nr	Gadus morhua	mdktskkgkekarfiplfqtgeskpnpiskkksqhldgeqkrlpdpisrkksqpldgeqkrlpnpiskkksrpldgeqkrlpnpiskkksrpldgeqkrlpnpipaeksrplgkgreedtaagqekaeetehtqgdkmkktreksqipaeegidefeevfarvlddaspvlkeelqttvqrrtpsyfqrklhdeqkdkdeeyydqwvqcsdcdkwrrlksgsepsdllgawtcplntdeqysscsvseegsgdddddnistslrpgclvwaqqtgypwwpamverdpdthqyccfthrtdtnpsryhvtylgqpvsrawlssgrikpyssltlerainmpsqkrhmeklkkavamaarvqketlitridmfgflgrfvsdressegsdleeaaydilds…

## Sheet: Species of BLAST orthologs
Same data from previous table (Blast identified orthologs) summarized by species of accessions.
Species	db	Sequence	Evidence	Notes
Chiloscyllium punctatum	nr	masctvtiqrihvrqltvladglkrkrskasgtqqsrnlslfadtpcsdyrlesvffcggmhdstcvlltavrtlgrpvvnkyfvfalndsvcqrekdkyvawvqcskekcgkwrrlednvdpatlpddwvcsqnpdplynmcdlpeevwdgrendiiyaelvpgsivwakqfgypwwpgmvehdpqtgkyfmfttnsdqfpskynitffdttvshawipvpliksfqeipqernmakrdfskrvnsakkmaeeaqkdrisqfgfivrykgiegaklsedsssqesledpcivkdakrpasrykeetrskdcakkepenhqltvrkgkgkngiiyidiftvygkt	Prosite
Muntiacus muntjak	nr	mmptleskekcgkgqkntfappaqklhslmlsnlnsskeeileisspqaevrpsllkaglekkkekattengpvsgqeikgkaqdskkakkekekstltsaefeeivqivlrksfqecletsctqptrctqlgkepgiassntsdnnnadgdrvvvppileisafqedgiipeikiskpgqpdsassekkfnkfslskrkkeaqdekmetdqsghehrqddqqketiqdhsqnrdqqkgegsgfgffavtgqclvwvqcsspncekwrrlhgnidpsilpdnwscdqntdlrynrcdipeetwtghesdvayasyipgsiiwakqygypwwpgmvepdpdlgeyflfashldslpskyhvtffgetvsrawipvnmlknfqemslelselrkcknkdci…	Prosite
Muntiacus reevesi	nr	mmptleskekcgkghkntfappaqklhslmlsnlnsskeeileisspqaevrpsllkaglekkkekattengpvsgqeikgkaqdskkakkekekstltsaefeeivqivlrksfqecletsctqptrctqlgkepgiassntsdnnnadgdrvvvppileisafqedgiipeikiskpgqpdsassekkfnkfslskrkkeaqdekmetdqsghehrqddqqketiqdhsqnrdqqkgegsgfgffavtgqclvwvqcsspncekwrrlhgnidpsilpdnwscdqntdlqynrcdipeetwtghesdvayasyipgsiiwakqygypwwpgmvepdpdlgeyflfashldslpskyhvtffgetvsrawipvnmlknfqemslelselrkcknkdci…	Prosite
Cervus elaphus	nr	mfhklhlmtkflsecgkgqkntfappaqklhslmpynlnsskeeileisspqaevrpsllkaglekkkektttengpvsgqeikgkaqnskkakkekekstltsaefeeivqivlrksfqeclvlwyrkslkptrctqldkepriassntsdnnnadgdrvvvppileisasqedgiipeikiskpgqpdsassekkfskfslsrrkkeaqdekmetdqsghehrqdnqqketiqdhsqnrdqqkgegsgfgqclvwvqcsspncekwrrlhgnidpsilpdnwscdqntdfhfmrlflslhssslladlqynrcdipeetwtghesdvayasyipgsiiwakqygypwwpgmvepdpdlgeyflfashldslpskyhvtffgetvsrawipvsmlknf…	Prosite
Geotrypetes seraphini	nt_genome		CD	36062636_GQCLVWVQCSSPHCEKWRRLRGNIDPSVLPDNWSCDQN_36062749__36064434_WPGMVEPDPDLGEYFLFASHLDSLPVSF_36064517
Geotrypetes seraphini	nt_genome		CD	33174940_GQCLVWVQCSSPNCEKWRRLCGNIDPSVLPDNWSCDQN_33175053__33177295_SKYHVTFFGETVSRAWIPVNMLKNFQEL_33177378
Lynx pardinus	nr	mvphileisatkeagvtsvietskpgqpdpppsekkfnrfslskgkkgarqclvwvqcsspncekwrrlcgnidpsvlpdnwscdqntdlkynrcdipeeswighesdvayasyipgsiiwakqygypwwpgmvesdpdlgeyflfashldslpskyhvtffgetvsrawipvnmlknfqelslelagvkrcrnkdcsqklgvaltmaqeaeqisiqervnlfgfrsryngsdnsregkditvtganspdsrlekegeeavleeveeeeeeekdstlpspkpakiqtknpkargiadgrdgilqskttkrslgnesaatpvrimgrkeghrnsepdqpgpkkkfkapqskaagtnfpedkearmepkglpppahlgacpmvgkegskcpqeagsvlhdd…	Prosite
Leptonychotes weddellii	nt_mRNA	MVESDPDLGEYFLFASHLDSLPSKYHVTFFGETVSRAWIPVNMLKNFQELSLELAGVKKCRNKDCNQKLGAALMMAQEAEQISIQERVNLFGFRSRYNGSDSSGEGKDLSLSGANSPDSCMEKEEEESELEAEELEEEEEKKYKSFISYSSSEFLCTR	Prosite
Crocuta crocuta	nr	fhlmikflsehgkgskktfappaqkmhslmcyspnshkeetleissskarlekkeekattengpssgkkkkgkaqdkqaekkekeklsltnaefeeivqivlrksfqeclgmaykmgsildfseascaqpirrtqlekepgiapstdndnadgekvmvphileisatkeagvtsviktskpgqpdpalsedkfnrfslskgkkrayekmekpqsgydprqkaqlkktvqnhsrirnqqkgegsgfgqclvwvqcsspncekwrrlcgnidpsmlpdnwscdqntdfkynrcdipeeswtgcesdvayasyipgsiiwakqygypwwpgmvesdpdlgeyflfashldslpskyhvtffgetvsrawipvnmlknfqelslelagvkkcrnkdcsqklga…	Prosite
Eschrichtius robustus	nr	mgskddadptfwrgvcekdrlflegfsgqclvwvqcsspncekwrrlrgnidpsvlpdnwscdqntdleynhcdipeetwtghesevayasyipgsiiwakqygypwwpgmvesdpdlgeyflfashldslpskyhvtffgetvsrawipvnmlknfqelslelagvkkcrskdcsqklgaalmmaqeaeqisiqervnlfgfwsrysgsdnsgegkdvmlsgansldsclekeeeeseleeeseleeeeeeqqkk	Prosite
Sousa chinensis	nr	fhlmikflsecgkgpkktfappaqklhslmpynlnsskeeilgisspeaetrpsllkarlekkkekttkengtssgqeikgkaqdskkaekkekgkstltnaefeeivqivlqkslqeclgmessldfaetscaqptrctqldkepgiassttdnnsadgvvvphileisasqeggvipeikiskpgqpdpapsekkfnklslskrkkaaqnekmekaqsghehrqkdqlkktvqdhsqirdqqkgegsgfgqclvwvqcsspncekwrrlrgnidpsvlpdnwscdqntdleynhcdipeetwtghenevayasyipgsiiwakqygypwwpgmvesdpdlgeyflfashldslpskyhvtffgetvsrawipvnmlknfqelslelaavkkcknkdf…	Prosite
Balaenoptera physalus	nr	mpcnlnsskeeilgisspeaetrpsllkarlekkkekttkengtgsgqeikgraqdnkkaekkekgkstltnaefeeivqivlqkslqeclgmafrmessldfaetscaqptrctqldkepgiassttdnnnadgervvvphileisasqeggvipeiktskpgqpdpapsekkfnklslskrkkaaqdekmekaqsghehkqkdqlkktvqdhsqirdqqkgegsgfgefshgqclvwvqcssancekwrrlrgnidpsvlpdnwscdqntdleynhcdipeetwtghesevayasyipgsiiwakqygypwwpgmvesdpdlgeyflfashldslprakarrrtrgynrtifllqskyhvtffgetvsrawipvnmlknfqelslelagvkkcrskd…	Prosite
Geotrypetes seraphini	nt_genome		CD	7971486_GRCLVWVQCSSPNCEKWRRLRGNIDPSILPDNWSCEQN_7971599__7973741_LQSKYHVTFFGETVSRAWIPVNMLKNFQEL_7973830
Geotrypetes seraphini	nt_genome		CD	32756424_GQCLVWVQCSSPNCEKWRRLRGNIDPSILPDNWSCEQN_32756537__32754212_LQSKYHVTFFGETVSRAWIPVNMLKNFQEL_32754301
Marmota monax	nr	mrphgpnshrdetlgisspvaeakasppkarlekeekattedgpgvgqekkgkaqdkpaekkekgkssltnaefeeivqivlqkslqeclgmgsglnfaetscvqtnsqsdkepgiasatdndnavgerkmiphtpetsasvedvpeirtsksaqlvpapsekkfnrlslskrkreaqdekmekvqgghecrekdqpekmiqgdsqirgqqkgeesgfgqclvwvqcsspncekwrrlrgnidpsilpdnwscdqntdldynrcdipeeiwtgresdvayasyvpgsiiwakqygypwwpgmvesdpdlgeyflfashldslpskyhvtffgetvsrawipvnmlknfqelslelagvkkcrnkdysqklvaaimmaqkaeqihigervnlfgfwsrys…	Prosite
Neotoma lepida	nr	cekgskktfapptqkshsvkpqpklwkedtlgtsspeaeakprrskasskkkeqktttehgpsggqekkrkaqdkpaekkgkekstltnaefeeifqsvlqkslqecletscvqpvmpiksdkepgiapsatdnenadgdgifsgrekdekiqdgrecslkdrqktmiqdhsqirgqqkeeeggfgqcliwvqcsspkcekwrqlrgdidpsvlpdnwscdqnpdlnynrcdipeetwtgcesdvayasyvpgsiiwakqygypwwpgmiesdpdlgeyflfgshldslpkkcrnkdysqkleaairmahkaeqiniqgqervnlfgfwsrysrsdgsgegkglmlcesnspesclekekxseeeeeekeekkdptlprpxpakiqtpktksrgptggr…	Prosite
Orycteropus afer	nt_mRNA	MMATLQNKEEYGKGPKKTFAPPVQKLHRLMPLSPNSLKEDTREISSPEAEATASLPKARLEKKNEKAHTENGPGSGQEERGKNLCNKQAEGKVEKERTSLTNAEFEEIVQIVLQKSLQECLGIGSDLGFAETSCVRPIGYTQSGKERGIASITAASDSADGSGKIPISIGKKTNQFVVWVQCSSPNCEKWRRLHGNIDPSTLPDNWSCAQNIVDREGYGVYEEKKIREIQWPGMVESDPDLGEYFLFASHLDSLPKKYKNKDCIQKLEAALKMAQEAEQVNIQAPMNVIDQISGMIGRVERRINKNLMLSGPNSSNSRFEKEEEVESEMEEEEEKKIEGPGPREPLCWEAGGAAPEDEASSDLDLEQLLEDVGEEPEPREESLRRDAGEDVTMALLEE	CD
Orycteropus afer	nr	mmatlqnkeeygkgpkktfappvqklhrlmplspnslkedtreisspeaeataslpkarlekknekahtengpgsgqeergknlcnkqaegkvekertsltnaefeeivqivlqkslqeclgigsdlgfaetscvrpigytqsgkergiasitaasdsadgsgkipisigkktnqfvvwvqcsspncekwrrlhgnidpstlpdnwscaqnivdregygvyeekkireiqwpgmvesdpdlgeyflfashldslpkkyknkdciqkleaalkmaqeaeqvniqapmnvidqisgmigrverrinknlmlsgpnssnsrfekeeevesemeeeeekkiegpgpreplcweaggaapedeassdldleqlledvgeepepreeslrrdagedvtmallee	CD
Monodelphis domestica	nt_mRNA	MHANQVRGRLPKPQGLTLAMVTSPLGGQRALRRALPLRRAPTLFKQREKPASKLNDDDLKEQGKLLETPYPPITLASKEEGIVPGTQSSKSDILPSEKKQNTLPLSNKKKEENKEKTKLTQESCKHRRKGQSRKIVQGYTQISDQEESGGEWAGNFGIAWVQCSFPSCEKWRQLHGNINSSSILPDNWSCSQNTGGQLDPDLGEYFLFTSQQDVLPAKYHVTFFGNSVSRAWISSNMLKNFQELSLEQVERDQVSLFGFSSRCKENASEPDSSEEEGDIFFKETKKTQSTGSSNSGFSKEESKVTHLSSQILFLSVAQPWWQPSLVLRLSMLPSGFGISFGQVTPFKMPFSSSKKQRSLPLKG	CD
Monodelphis domestica	nr	mhanqvrgrlpkpqgltlamvtsplggqralrralplrraptlfkqrekpasklndddlkeqgklletpyppitlaskeegivpgtqssksdilpsekkqntlplsnkkkeenkektkltqesckhrrkgqsrkivqgytqisdqeesggewagnfgiawvqcsfpscekwrqlhgninsssilpdnwscsqntggqldpdlgeyflftsqqdvlpakyhvtffgnsvsrawissnmlknfqelsleqverdqvslfgfssrckenasepdsseeegdiffketkktqstgssnsgfskeeskvthlssqilflsvaqpwwqpslvlrlsmlpsgfgisfgqvtpfkmpfssskkqrslplkg	CD
Geotrypetes seraphini	nt_genome		CD	31307533_QCIVWVQCSLENCQKWRRLESNIDPSSLPENWSCSEN_31307643__31329904_SKYHITFLGDCVSRAWISTSMLKNFKEL_31329987
Ophiophagus hannah	nr	mkeveetgcctawvqcsypscekwrrlssdvdpsaxlssdvdpsalpedwscsqnpgsivwakqygypwwpgiieadpdigeyflfssqadslpvkycvvhlpltflctrmwsrviinlageefsrskyhvtffghsvtrawisasllknygeppgegnalvrgalpegsfakqntkpivdmcavasqptarsdrvvpflepllsrprir	Prosite
Paroedura picta	nr	lvgrgaeevggggkgagivtpgllmasapvrvgqetntskthssvmasqnnnnevrkvskklftpplanpriafakgepvhhrkqedgqadhvplncpagngsaskpmkahypkanpkgqekkqkgstkeddclsdslfeeivesvlkksleecmedfkkiapsaeeqglgretveaspppketvpgkasrdesevmlveagqqeprlekrrhgkpsvkdknenpeadnggrkekrkgapkkkvqgnaqiadqeekqkegeeeeaadegswcvawvqcsypacgkwrrlcsdvdpsvlpdnwscsenpdlqynscgipeetwlgsesevvyaiyipgsivwakqygypwwpgmieadpdigeyflfssrtdslpskyhvtffgdsvsrawisasmlrnf…	Prosite
Platysternon megacephalum	nr	mkdqcvawvqcsypscekwrrlssdtdpsvlpedwtcsqntdlhyrscdvpeetwsgsenevvyatyvpgsiiwakqfgypwwpamvecdpdigeyflfssrldslpktlrskdyrqkldaavrmakeakrisiqervmrfgfisrsgeeglleahedseelfnvacepreekqpcdgnenmvatsdfkektflkglkkkftvpgsnssgssqpkppaggnrvnltpsrrdglkpelvkmlqvkdnttrshsrsssndeifeefqevgelekakearesqeaeknesseecslvlfee	Prosite
Chanos chanos	nt_mRNA	MFAPPVTRPCHAEVQKFTLGQGGEKTKLTESEEGREEVFKPAKVGKSVDDVLWVQCSRAVCGKWRQLKDNEDPSALHLDWTCDKNTDPEYSSCSAPEERYCTSLEETFFCKLVPGSLVWAQQNGYPWWPAMVERDPDSNEYLLFKKETDQTPYKCHVTYLGTPVSRAWVLYNRVKDYAGLTEETLLNTVKQERLKKSLKESICMARQAVELSLKRRLARFGFWARHVSDRESSDEDSSIAAEENEDQTVPESIVEMSPDLTPASRDEDGESVEKKIRRGQDGGQPGEGKSADRCAFVYTADYEPASPLKNELCDYPLSPLPSVQSRYGYSAGRIVLPVKSRNHHCDEELLIHSATQGRARIRMV	Prosite
Chanos chanos	nr	mfappvtrpchaevqkftlgqggektklteseegreevfkpakvgksvddvlwvqcsravcgkwrqlkdnedpsalhldwtcdkntdpeysscsapeeryctsleetffcklvpgslvwaqqngypwwpamverdpdsneyllfkketdqtpykchvtylgtpvsrawvlynrvkdyaglteetllntvkqerlkkslkesicmarqavelslkrrlarfgfwarhvsdressdedssiaaeenedqtvpesivemspdltpasrdedgesvekkirrgqdggqpgegksadrcafvytadyepasplknelcdyplsplpsvqsrygysagrivlpvksrnhhcdeellihsatqgrarirmv	Prosite
Tachysurus fulvidraco	nt_mRNA	MAPRPSSGELWGLHLMPPRILVDCCLPNGMLVSLECLREAPLISIKQQLFTEARKYPLYHLLQEESCYIFVGVTQEAEREEFYDETRRLCDLRLFHPILKVIEPLGNREEKILNREIGFAIGMPICEFELVKDSEVQDFRRSILSVCREAMEEREGGGPHTHALYVYPPSVESSPQLPQHIYAKLDKGRLIVTIWVVVSPSNAKQKYTLKIAHDCVPEQLIAEAIRKKTRSMHLSAQQLRLCVQEYQGQYILKVCGCDEYLLEKYPLSQYKYIRSCIIVGKLPHLMLVSKDSVYDQLPCSGFVTPSYSRRTPQPSPSPGGGDPTNPRSLWTFNAHTPLRIRLICATYVNVNIRDIDKIYVRTGIYHGGEPLCDNVNTQRVPCSNPRWNEWLMYDITLTD…	Prosite
Gadus morhua	nt_mRNA	MDKTSKKGKEKARFIPLFQTGESKPNPISKKKSQHLDGEQKRLPDPISRKKSQPLDGEQKRLPNPISKKKSRPLDGEQKRLPNPISKKKSRPLDGEQKRLPNPIPAEKSRPLGKGREEDTAAGQEKAEETEHTQGDKMKKTREKSQIPAEEGIDEFEEVFARVLDDASPVLKEELQTTVQRRTPSYFQRKLHDEQKDKDEEYYDQWVQCSDCDKWRRLKSGSEPSDLLGAWTCPLNTDEQYSSCSVSEEGSGDDDDDNISTSLRPGCLVWAQQTGYPWWPAMVERDPDTHQYCCFTHRTDTNPSRYHVTYLGQPVSRAWLSSGRIKPYSSLTLERAINMPSQKRHMEKLKKAVAMAARVQKETLITRIDMFGFLGRFVSDRESSEGSDLEEAAYDILDS…	Prosite
Gadus morhua	nr	mdktskkgkekarfiplfqtgeskpnpiskkksqhldgeqkrlpdpisrkksqpldgeqkrlpnpiskkksrpldgeqkrlpnpiskkksrpldgeqkrlpnpipaeksrplgkgreedtaagqekaeetehtqgdkmkktreksqipaeegidefeevfarvlddaspvlkeelqttvqrrtpsyfqrklhdeqkdkdeeyydqwvqcsdcdkwrrlksgsepsdllgawtcplntdeqysscsvseegsgdddddnistslrpgclvwaqqtgypwwpamverdpdthqyccfthrtdtnpsryhvtylgqpvsrawlssgrikpyssltlerainmpsqkrhmeklkkavamaarvqketlitridmfgflgrfvsdressegsdleeaaydilds…	Prosite

## Sheet: All ZCWPW1 Orthologs
Summary of All species with ZCWPW1 orthologs and the evidence of they were identified.
Species	Clade	NCBI	Ensembl	OrthoDB	Blast
Acinonyx jubatus	Placental	Yes	--	Yes	--
Ailuropoda melanoleuca	Placental	Yes	Yes	Yes	--
Anolis carolinensis	Squamata	Yes	Yes	Yes	--
Aotus nancymaae	Placental	Yes	Yes	Yes	--
Astyanax mexicanus	Bony fish	--	Yes	Yes	--
Balaenoptera acutorostrata	Placental	Yes	--	Yes	--
Balaenoptera physalus	Placental	--	--	--	nr
Bison bison	Placental	Yes	Yes	Yes	--
Bos grunniens	Placental	--	Yes	Yes	--
Bos indicus	Placental	Yes	Yes	Yes	--
Bos mutus	Placental	Yes	Yes	--	--
Bos taurus	Placental	Yes	Yes	Yes	--
Bubalus bubalis	Placental	Yes	--	Yes	--
Callithrix jacchus	Placental	Yes	Yes	Yes	--
Callorhinus ursinus	Placental	Yes	--	--	--
Camelus bactrianus	Placental	Yes	--	Yes	--
Camelus dromedarius	Placental	Yes	Yes	Yes	--
Camelus ferus	Placental	Yes	--	Yes	--
Canis lupus	Placental	Yes	Yes	Yes	--
Capra hircus	Placental	Yes	Yes	Yes	--
Carlito syrichta	Placental	Yes	Yes	Yes	--
Castor canadensis	Placental	Yes	Yes	Yes	--
Catagonus wagneri	Placental	--	Yes	--	--
Cavia porcellus	Placental	Yes	--	Yes	--
Cebus capucinus	Placental	Yes	Yes	Yes	--
Ceratotherium simum	Placental	Yes	--	Yes	--
Cercocebus atys	Placental	Yes	Yes	Yes	--
Cervus elaphus	Placental	--	--	--	nr
Chanos chanos	Bony fish	--	--	--	nt_mRNA/nr
Chelonia mydas	Turtle	Yes	--	Yes	--
Chelonoidis abingdonii	Turtle	--	Yes	--	--
Chiloscyllium punctatum	Cartilaginous fish	--	--	--	nr
Chinchilla lanigera	Placental	Yes	Yes	Yes	--
Chlorocebus sabaeus	Placental	Yes	Yes	Yes	--
Chrysemys picta	Turtle	Yes	Yes	Yes	--
Chrysochloris asiatica	Placental	Yes	--	Yes	--
Clupea harengus	Bony fish	Yes	Yes	--	--
Colobus angolensis	Placental	Yes	Yes	Yes	--
Condylura cristata	Placental	Yes	--	Yes	--
Cricetulus griseus	Placental	Yes	Yes	Yes	--
Crocuta crocuta	Placental	--	--	--	nr
Dasypus novemcinctus	Placental	Yes	Yes	Yes	--
Delphinapterus leucas	Placental	Yes	--	Yes	--
Desmodus rotundus	Placental	Yes	--	--	--
Echinops telfairi	Placental	Yes	Yes	Yes	--
Elephantulus edwardii	Placental	Yes	--	Yes	--
Enhydra lutris	Placental	Yes	--	Yes	--
Eptesicus fuscus	Placental	Yes	--	Yes	--
Equus asinus	Placental	Yes	Yes	Yes	--
Equus caballus	Placental	Yes	Yes	Yes	--
Equus przewalskii	Placental	Yes	--	Yes	--
Erinaceus europaeus	Placental	Yes	--	Yes	--
Eschrichtius robustus	Placental	--	--	--	nr
Esox lucius	Bony fish	Yes	--	--	--
Eumetopias jubatus	Placental	Yes	--	--	--
Felis catus	Placental	Yes	Yes	Yes	--
Fukomys damarensis	Placental	Yes	Yes	Yes	--
Gadus morhua	Bony fish	--	--	--	nt_mRNA/nr
Galeopterus variegatus	Placental	Yes	--	Yes	--
Geotrypetes seraphini	Amphibians	--	--	--	nt_genome
Globicephala melas	Placental	Yes	--	--	--
Gopherus agassizii	Turtle	--	Yes	--	--
Gopherus evgoodei	Turtle	Yes	--	--	--
Gorilla gorilla	Placental	Yes	Yes	Yes	--
Grammomys surdaster	Placental	Yes	--	--	--
Heterocephalus glaber	Placental	Yes	Yes	Yes	--
Hipposideros armiger	Placental	Yes	--	Yes	--
Homo sapiens	Placental	Yes	Yes	Yes	--
Ictalurus punctatus	Bony fish	--	--	Yes	--
Ictidomys tridecemlineatus	Placental	Yes	Yes	Yes	--
Jaculus jaculus	Placental	Yes	--	Yes	--
Lagenorhynchus obliquidens	Placental	Yes	--	--	--
Latimeria chalumnae	Coelacanth	Yes	Yes	Yes	--
Lepisosteus oculatus	Bony fish	--	Yes	Yes	--
Leptonychotes weddellii	Placental	--	--	--	nt_mRNA
Lipotes vexillifer	Placental	Yes	--	Yes	--
Loxodonta africana	Placental	Yes	Yes	Yes	--
Lynx canadensis	Placental	Yes	Yes	--	--
Lynx pardinus	Placental	--	--	--	nr
Macaca fascicularis	Placental	Yes	Yes	Yes	--
Macaca mulatta	Placental	Yes	Yes	Yes	--
Macaca nemestrina	Placental	Yes	Yes	Yes	--
Mandrillus leucophaeus	Placental	Yes	Yes	Yes	--
Manis javanica	Placental	Yes	--	Yes	--
Marmota flaviventris	Placental	Yes	--	--	--
Marmota marmota	Placental	Yes	Yes	Yes	--
Marmota monax	Placental	--	--	--	nr
Mastomys coucha	Placental	Yes	--	--	--
Meriones unguiculatus	Placental	Yes	Yes	Yes	--
Mesocricetus auratus	Placental	Yes	Yes	Yes	--
Microcaecilia unicolor	Amphibians	Yes	--	--	--
Microcebus murinus	Placental	Yes	Yes	Yes	--
Microtus ochrogaster	Placental	Yes	Yes	Yes	--
Miniopterus natalensis	Placental	Yes	--	Yes	--
Monodelphis domestica	Marsupial	Yes	Yes	Yes	nt_mRNA/nr
Monodon monoceros	Placental	Yes	--	--	--
Moschus moschiferus	Placental	--	Yes	--	--
Muntiacus muntjak	Placental	--	--	--	nr
Muntiacus reevesi	Placental	--	--	--	nr
Mus caroli	Placental	Yes	Yes	Yes	--
Mus musculus	Placental	Yes	Yes	Yes	--
Mus pahari	Placental	Yes	Yes	Yes	--
Mus spicilegus	Placental	--	Yes	--	--
Mustela erminea	Placental	Yes	--	--	--
Mustela putorius	Placental	Yes	Yes	Yes	--
Myotis brandtii	Placental	Yes	--	Yes	--
Myotis davidii	Placental	Yes	--	Yes	--
Myotis lucifugus	Placental	Yes	Yes	Yes	--
Nannospalax galili	Placental	Yes	Yes	Yes	--
Neomonachus schauinslandi	Placental	Yes	--	Yes	--
Neophocaena asiaeorientalis	Placental	Yes	--	--	--
Neotoma lepida	Placental	--	--	--	nr
Neovison vison	Placental	--	Yes	--	--
Nomascus leucogenys	Placental	Yes	Yes	Yes	--
Notamacropus eugenii	Marsupial	--	Yes	--	--
Ochotona princeps	Placental	Yes	Yes	Yes	--
Octodon degus	Placental	Yes	--	Yes	--
Odobenus rosmarus	Placental	Yes	--	Yes	--
Odocoileus virginianus	Placental	Yes	--	Yes	--
Oncorhynchus kisutch	Bony fish	Yes	--	--	--
Oncorhynchus mykiss	Bony fish	Yes	--	Yes	--
Oncorhynchus tshawytscha	Bony fish	Yes	--	Yes	--
Ophiophagus hannah	Squamata	--	--	--	nr
Orcinus orca	Placental	Yes	--	Yes	--
Ornithorhynchus anatinus	Monotremata	Yes	--	--	--
Orycteropus afer	Placental	Yes	--	Yes	nt_mRNA/nr
Oryctolagus cuniculus	Placental	Yes	Yes	Yes	--
Otolemur garnettii	Placental	Yes	Yes	Yes	--
Ovis aries	Placental	Yes	Yes	Yes	--
Pan paniscus	Placental	Yes	Yes	Yes	--
Pan troglodytes	Placental	Yes	Yes	Yes	--
Panthera pardus	Placental	Yes	Yes	Yes	--
Panthera tigris	Placental	Yes	Yes	Yes	--
Pantholops hodgsonii	Placental	--	--	Yes	--
Papio anubis	Placental	Yes	Yes	Yes	--
Paramormyrops kingsleyae	Bony fish	Yes	Yes	Yes	--
Paroedura picta	Squamata	--	--	--	nr
Pelodiscus sinensis	Turtle	Yes	--	Yes	--
Peromyscus leucopus	Placental	Yes	--	--	--
Peromyscus maniculatus	Placental	Yes	Yes	Yes	--
Petromyzon marinus	Jawless fish	--	Yes	--	--
Phascolarctos cinereus	Marsupial	Yes	Yes	Yes	--
Phoca vitulina	Placental	Yes	--	--	--
Phyllostomus discolor	Placental	Yes	--	--	--
Physeter catodon	Placental	--	--	Yes	--
Piliocolobus tephrosceles	Placental	Yes	Yes	Yes	--
Platysternon megacephalum	Turtle	--	--	--	nr
Podarcis muralis	Squamata	--	Yes	--	--
Pogona vitticeps	Squamata	Yes	Yes	Yes	--
Pongo abelii	Placental	Yes	Yes	Yes	--
Prolemur simus	Placental	--	Yes	--	--
Propithecus coquereli	Placental	Yes	Yes	Yes	--
Protobothrops mucrosquamatus	Squamata	Yes	--	--	--
Pteropus alecto	Placental	Yes	--	Yes	--
Pteropus vampyrus	Placental	Yes	Yes	Yes	--
Puma concolor	Placental	Yes	--	--	--
Pygocentrus nattereri	Bony fish	--	--	Yes	--
Python bivittatus	Squamata	Yes	--	--	--
Rattus norvegicus	Placental	Yes	Yes	Yes	--
Rhinatrema bivittatum	Amphibians	Yes	--	--	--
Rhincodon typus	Cartilaginous fish	--	--	Yes	--
Rhinolophus ferrumequinum	Placental	--	Yes	--	--
Rhinolophus sinicus	Placental	--	--	Yes	--
Rhinopithecus bieti	Placental	Yes	Yes	Yes	--
Rhinopithecus roxellana	Placental	Yes	Yes	Yes	--
Rousettus aegyptiacus	Placental	Yes	--	Yes	--
Saimiri boliviensis	Placental	Yes	Yes	Yes	--
Salmo salar	Bony fish	--	--	Yes	--
Salmo trutta	Bony fish	--	Yes	--	--
Sapajus apella	Placental	Yes	--	--	--
Sarcophilus harrisii	Marsupial	Yes	Yes	Yes	--
Sorex araneus	Placental	--	Yes	--	--
Sousa chinensis	Placental	--	--	--	nr
Spermophilus dauricus	Placental	--	Yes	--	--
Suricata suricatta	Placental	Yes	Yes	--	--
Sus scrofa	Placental	Yes	Yes	Yes	--
Tachysurus fulvidraco	Bony fish	--	--	--	nt_mRNA
Terrapene carolina	Turtle	Yes	Yes	Yes	--
Thamnophis elegans	Squamata	Yes	--	--	--
Thamnophis sirtalis	Squamata	Yes	--	Yes	--
Theropithecus gelada	Placental	Yes	Yes	--	--
Trichechus manatus	Placental	Yes	--	Yes	--
Tupaia chinensis	Placental	Yes	--	Yes	--
Tursiops truncatus	Placental	Yes	--	Yes	--
Urocitellus parryii	Placental	Yes	Yes	--	--
Ursus arctos	Placental	Yes	--	--	--
Ursus maritimus	Placental	Yes	--	Yes	--
Vicugna pacos	Placental	Yes	Yes	Yes	--
Vombatus ursinus	Marsupial	Yes	Yes	--	--
Vulpes vulpes	Placental	Yes	Yes	--	--
Xenopus laevis	Amphibians	--	--	Yes	--
Xenopus tropicalis	Amphibians	Yes	--	--	--
Zalophus californianus	Placental	Yes	--	--	--

## Sheet: PRDM9 and Zcwpw1 Comparison
Comparison of ZCWPW1 and PRDM9 orthologs across different clades of vertebrates. PRDM9 data is reproduced from (Baker et al. 2017, https://doi.org/10.7554/eLife.24133.022). For species with multiple PRDM9 orthologs, the domain structure and catalytic tyrosines are reported for the isoform with the maximum number.
Species	Clade	ZCWPW1 Present	PRDM9 Present	Domain architecture	PRDM9 Catalytic Tyrosines
Acinonyx jubatus	Placental	Yes	Yes	KRAB-SSXRD-SET	3
Ailuropoda melanoleuca	Placental	Yes	Yes	KRAB-SSXRD-SET	3
Anguilla anguilla	Bony fish	--	Yes	KRAB-SSXRD-SET	2
Anguilla japonica	Bony fish	--	Yes	SSXRD-SET	3
Anguilla rostrata	Bony fish	--	Yes	KRAB-SSXRD-SET	3
Anolis carolinensis	Squamata	Yes	--	--	--
Aotus nancymaae	Placental	Yes	--	--	--
Apalone spinifera	Turtle	--	Yes	KRAB-SSXRD-SET	3
Astyanax mexicanus	Bony fish	Yes	Yes	SET	3
Balaenoptera acutorostrata	Placental	Yes	Yes	KRAB-SSXRD-SET	3
Balaenoptera physalus	Placental	Yes	--	--	--
Bison bison	Placental	Yes	Yes	KRAB-SSXRD-SET	3
Boa constrictor	Squamata	--	Yes	KRAB-SSXRD-SET	3
Bos grunniens	Placental	Yes	--	--	--
Bos indicus	Placental	Yes	--	--	--
Bos mutus	Placental	Yes	Yes	KRAB-SSXRD-SET	3
Bos taurus	Placental	Yes	Yes	KRAB-SSXRD-SET	3
Brevoortia tyrannus	Bony fish	--	Yes	KRAB-SSXRD-SET	3
Bubalus bubalis	Placental	Yes	Yes	KRAB-SSXRD-SET	3
Callithrix jacchus	Placental	Yes	--	--	--
Callorhinchus milii	Cartilaginous fish	--	Yes	KRAB-SET	3
Callorhinus ursinus	Placental	Yes	--	--	--
Camelus bactrianus	Placental	Yes	Yes	KRAB-SSXRD-SET	3
Camelus dromedarius	Placental	Yes	Yes	KRAB-SSXRD-SET	3
Camelus ferus	Placental	Yes	Yes	KRAB-SSXRD-SET	3
Canis lupus	Placental	Yes	--	--	--
Capra hircus	Placental	Yes	--	--	--
Carlito syrichta	Placental	Yes	Yes	KRAB-SSXRD-SET	3
Castor canadensis	Placental	Yes	--	--	--
Catagonus wagneri	Placental	Yes	--	--	--
Cavia porcellus	Placental	Yes	--	--	--
Cebus capucinus	Placental	Yes	--	--	--
Ceratotherium simum	Placental	Yes	Yes	KRAB-SSXRD-SET	3
Cercocebus atys	Placental	Yes	Yes	KRAB-SSXRD-SET	3
Cervus elaphus	Placental	Yes	--	--	--
Chanos chanos	Bony fish	Yes	--	--	--
Chelonia mydas	Turtle	Yes	Yes	KRAB-SSXRD-SET	3
Chelonoidis abingdonii	Turtle	Yes	--	--	--
Chiloscyllium punctatum	Cartilaginous fish	Yes	--	--	--
Chinchilla lanigera	Placental	Yes	Yes	KRAB-SSXRD-SET	3
Chlorocebus sabaeus	Placental	Yes	Yes	KRAB-SSXRD-SET	3
Chrysemys picta	Turtle	Yes	Yes	KRAB-SSXRD-SET	3
Chrysochloris asiatica	Placental	Yes	Yes	KRAB-SSXRD-SET	3
Clupea harengus	Bony fish	Yes	Yes	SET	3
Colobus angolensis	Placental	Yes	Yes	SSXRD-SET	3
Condylura cristata	Placental	Yes	Yes	KRAB-SSXRD-SET	3
Cricetulus griseus	Placental	Yes	Yes	KRAB-SSXRD-SET	3
Crocuta crocuta	Placental	Yes	--	--	--
Crotalus horridus	Squamata	--	Yes	KRAB-SSXRD-SET	3
Crotalus mitchellii	Squamata	--	Yes	KRAB-SSXRD-SET	3
Cynoglossus semilaevis	Bony fish	--	Yes	SET	1
Cyprinus carpio	Bony fish	--	Yes	SET	1
Danio rerio	Bony fish	--	Yes	SET	1
Dasypus novemcinctus	Placental	Yes	Yes	KRAB-SSXRD-SET	3
Deinagkistrodon acutus	Squamata	--	Yes	KRAB-SSXRD-SET	3
Delphinapterus leucas	Placental	Yes	--	--	--
Desmodus rotundus	Placental	Yes	--	--	--
Dipodomys ordii	Placental	--	Yes	KRAB-SSXRD-SET	3
Echinops telfairi	Placental	Yes	Yes	KRAB-SSXRD-SET	3
Elephantulus edwardii	Placental	Yes	--	--	--
Enhydra lutris	Placental	Yes	--	--	--
Eptesicus fuscus	Placental	Yes	Yes	SSXRD-SET	3
Equus asinus	Placental	Yes	--	--	--
Equus caballus	Placental	Yes	Yes	SSXRD-SET	3
Equus przewalskii	Placental	Yes	Yes	KRAB-SSXRD-SET	3
Erinaceus europaeus	Placental	Yes	Yes	KRAB-SSXRD-SET	3
Eschrichtius robustus	Placental	Yes	--	--	--
Esox lucius	Bony fish	Yes	Yes	KRAB-SSXRD-SET	3
Eublepharis macularius	Squamata	--	Yes	KRAB-SSXRD-SET	3
Eumetopias jubatus	Placental	Yes	--	--	--
Felis catus	Placental	Yes	Yes	KRAB-SSXRD-SET	3
Fukomys damarensis	Placental	Yes	Yes	KRAB-SSXRD-SET	2
Fundulus heteroclitus	Bony fish	--	Yes	SET	1
Gadus morhua	Bony fish	Yes	Yes	SET	3
Galeopterus variegatus	Placental	Yes	Yes	KRAB-SSXRD-SET	3
Gekko japonicus	Squamata	--	Yes	KRAB-SSXRD-SET	3
Geotrypetes seraphini	Amphibians	Yes	--	--	--
Globicephala melas	Placental	Yes	--	--	--
Gopherus agassizii	Turtle	Yes	--	--	--
Gopherus evgoodei	Turtle	Yes	--	--	--
Gorilla gorilla	Placental	Yes	Yes	KRAB-SSXRD-SET	3
Grammomys surdaster	Placental	Yes	--	--	--
Haplochromis burtoni	Bony fish	--	Yes	SET	0
Heterocephalus glaber	Placental	Yes	Yes	KRAB-SSXRD-SET	3
Hipposideros armiger	Placental	Yes	--	--	--
Homo sapiens	Placental	Yes	Yes	KRAB-SSXRD-SET	3
Ictalurus punctatus	Bony fish	Yes	Yes	SET	3
Ictidomys tridecemlineatus	Placental	Yes	Yes	KRAB-SSXRD-SET	3
Jaculus jaculus	Placental	Yes	Yes	KRAB-SSXRD-SET	3
Lagenorhynchus obliquidens	Placental	Yes	--	--	--
Larimichthys crocea	Bony fish	--	Yes	SET	2
Latimeria chalumnae	Coelacanth	Yes	Yes	KRAB-SSXRD-SET	3
Latimeria menadoensis	Coelacanth	--	Yes	KRAB-SSXRD-SET	3
Lepisosteus oculatus	Bony fish	Yes	Yes	KRAB-SSXRD-SET	3
Leptonychotes weddellii	Placental	Yes	Yes	SSXRD-SET	3
Lethenteron camtschaticum	Jawless fish	--	Yes	SSXRD-SET	3
Lipotes vexillifer	Placental	Yes	Yes	KRAB-SSXRD-SET	3
Loxodonta africana	Placental	Yes	Yes	KRAB-SSXRD-SET	3
Lynx canadensis	Placental	Yes	--	--	--
Lynx pardinus	Placental	Yes	--	--	--
Macaca fascicularis	Placental	Yes	Yes	KRAB-SSXRD-SET	3
Macaca mulatta	Placental	Yes	Yes	KRAB-SSXRD-SET	3
Macaca nemestrina	Placental	Yes	Yes	KRAB-SSXRD-SET	2
Macropus eugenii	Marsupial	--	Yes	KRAB-SSXRD-SET	3
Mandrillus leucophaeus	Placental	Yes	Yes	KRAB-SSXRD-SET	3
Manis javanica	Placental	Yes	--	--	--
Marmota flaviventris	Placental	Yes	--	--	--
Marmota marmota	Placental	Yes	Yes	KRAB-SSXRD-SET	3
Marmota monax	Placental	Yes	--	--	--
Mastomys coucha	Placental	Yes	--	--	--
Maylandia zebra	Bony fish	--	Yes	SET	0
Meriones unguiculatus	Placental	Yes	--	--	--
Mesocricetus auratus	Placental	Yes	Yes	KRAB-SSXRD-SET	3
Microcaecilia unicolor	Amphibians	Yes	--	--	--
Microcebus murinus	Placental	Yes	Yes	KRAB-SSXRD-SET	3
Microtus ochrogaster	Placental	Yes	Yes	KRAB-SSXRD-SET	3
Miniopterus natalensis	Placental	Yes	Yes	KRAB-SSXRD-SET	2
Monodelphis domestica	Marsupial	Yes	Yes	KRAB-SSXRD-SET	3
Monodon monoceros	Placental	Yes	--	--	--
Moschus moschiferus	Placental	Yes	--	--	--
Muntiacus muntjak	Placental	Yes	--	--	--
Muntiacus reevesi	Placental	Yes	--	--	--
Mus caroli	Placental	Yes	--	--	--
Mus musculus	Placental	Yes	Yes	KRAB-SSXRD-SET	3
Mus pahari	Placental	Yes	--	--	--
Mus spicilegus	Placental	Yes	--	--	--
Mustela erminea	Placental	Yes	--	--	--
Mustela putorius	Placental	Yes	Yes	KRAB-SSXRD-SET	3
Myotis brandtii	Placental	Yes	Yes	SSXRD-SET	3
Myotis davidii	Placental	Yes	Yes	SSXRD-SET	3
Myotis lucifugus	Placental	Yes	Yes	SSXRD-SET	3
Nannospalax galili	Placental	Yes	Yes	KRAB-SSXRD-SET	3
Neolamprologus brichardi	Bony fish	--	Yes	SET	0
Neomonachus schauinslandi	Placental	Yes	--	--	--
Neophocaena asiaeorientalis	Placental	Yes	--	--	--
Neotoma lepida	Placental	Yes	--	--	--
Neovison vison	Placental	Yes	--	--	--
Nomascus leucogenys	Placental	Yes	Yes	SSXRD-SET	3
Notamacropus eugenii	Marsupial	Yes	--	--	--
Nothobranchius furzeri	Bony fish	--	Yes	SET	1
Notothenia coriiceps	Bony fish	--	Yes	SET	2
Ochotona princeps	Placental	Yes	Yes	KRAB-SSXRD-SET	3
Octodon degus	Placental	Yes	Yes	KRAB-SSXRD-SET	3
Odobenus rosmarus	Placental	Yes	Yes	KRAB-SSXRD-SET	3
Odocoileus virginianus	Placental	Yes	--	--	--
Oncorhynchus kisutch	Bony fish	Yes	--	--	--
Oncorhynchus mykiss	Bony fish	Yes	--	--	--
Oncorhynchus tshawytscha	Bony fish	Yes	--	--	--
Ophiophagus hannah	Squamata	Yes	Yes	KRAB-SSXRD-SET	3
Ophisaurus gracilis	Squamata	--	Yes	KRAB-SSXRD-SET	3
Orcinus orca	Placental	Yes	Yes	KRAB-SSXRD-SET	3
Oreochromis niloticus	Bony fish	--	Yes	SET	0
Ornithorhynchus anatinus	Monotremata	Yes	Yes	SSXRD-SET	3
Orycteropus afer	Placental	Yes	Yes	SSXRD-SET	3
Oryctolagus cuniculus	Placental	Yes	Yes	KRAB-SSXRD-SET	3
Oryzias latipes	Bony fish	--	Yes	SET	2
Osteoglossum bicirrhosum	Bony fish	--	Yes	SET	2
Otolemur garnettii	Placental	Yes	Yes	KRAB-SSXRD-SET	3
Ovis aries	Placental	Yes	Yes	KRAB-SSXRD-SET	3
Pan paniscus	Placental	Yes	Yes	KRAB-SSXRD-SET	2
Pan troglodytes	Placental	Yes	Yes	SSXRD-SET	2
Panthera pardus	Placental	Yes	--	--	--
Panthera tigris	Placental	Yes	Yes	KRAB-SSXRD-SET	3
Pantherophis guttatus	Squamata	--	Yes	KRAB-SSXRD-SET	3
Pantholops hodgsonii	Placental	Yes	--	--	--
Papio anubis	Placental	Yes	Yes	KRAB-SSXRD-SET	3
Paramormyrops kingsleyae	Bony fish	Yes	--	--	--
Paroedura picta	Squamata	Yes	--	--	--
Pelodiscus sinensis	Turtle	Yes	Yes	KRAB-SSXRD-SET	3
Peromyscus leucopus	Placental	Yes	--	--	--
Peromyscus maniculatus	Placental	Yes	Yes	KRAB-SSXRD-SET	3
Petromyzon marinus	Jawless fish	Yes	Yes	KRAB-SSXRD-SET	3
Phascolarctos cinereus	Marsupial	Yes	Yes	KRAB-SSXRD-SET	3
Phoca vitulina	Placental	Yes	--	--	--
Phyllostomus discolor	Placental	Yes	--	--	--
Physeter catodon	Placental	Yes	Yes	KRAB-SSXRD-SET	3
Piliocolobus tephrosceles	Placental	Yes	--	--	--
Platysternon megacephalum	Turtle	Yes	--	--	--
Podarcis muralis	Squamata	Yes	--	--	--
Poecilia formosa	Bony fish	--	Yes	SET	1
Poecilia latipinna	Bony fish	--	Yes	SET	1
Poecilia mexicana	Bony fish	--	Yes	SET	1
Poecilia reticulata	Bony fish	--	Yes	SET	1
Pogona vitticeps	Squamata	Yes	Yes	KRAB-SSXRD-SET	3
Pongo abelii	Placental	Yes	Yes	KRAB-SSXRD-SET	3
Prolemur simus	Placental	Yes	--	--	--
Propithecus coquereli	Placental	Yes	Yes	KRAB-SSXRD-SET	3
Protobothrops mucrosquamatus	Squamata	Yes	Yes	KRAB-SSXRD-SET	3
Pteropus alecto	Placental	Yes	Yes	KRAB-SSXRD-SET	3
Pteropus vampyrus	Placental	Yes	Yes	KRAB-SSXRD-SET	3
Puma concolor	Placental	Yes	--	--	--
Pundamilia nyererei	Bony fish	--	Yes	SET	0
Pygocentrus nattereri	Bony fish	Yes	Yes	SET	3
Python bivittatus	Squamata	Yes	Yes	KRAB-SSXRD-SET	3
Rattus norvegicus	Placental	Yes	Yes	KRAB-SSXRD-SET	3
Rhinatrema bivittatum	Amphibians	Yes	--	--	--
Rhincodon Typus	Cartilaginous fish	--	Yes	KRAB-SSXRD-SET	3
Rhincodon typus	Cartilaginous fish	Yes	--	--	--
Rhinolophus ferrumequinum	Placental	Yes	--	--	--
Rhinolophus sinicus	Placental	Yes	--	--	--
Rhinopithecus bieti	Placental	Yes	--	--	--
Rhinopithecus roxellana	Placental	Yes	Yes	KRAB-SSXRD-SET	3
Rousettus aegyptiacus	Placental	Yes	Yes	KRAB-SSXRD-SET	3
Saimiri boliviensis	Placental	Yes	--	--	--
Salmo salar	Bony fish	Yes	Yes	KRAB-SSXRD-SET	3
Salmo trutta	Bony fish	Yes	Yes	KRAB-SSXRD-SET	3
Sapajus apella	Placental	Yes	--	--	--
Sarcophilus harrisii	Marsupial	Yes	Yes	SSXRD-SET	3
Scleropages formosus	Bony fish	--	Yes	SET	2
Sinocyclocheilus anshuiensis	Bony fish	--	Yes	SET	1
Sinocyclocheilus grahami	Bony fish	--	Yes	SET	1
Sinocyclocheilus rhinocerous	Bony fish	--	Yes	SET	1
Sorex araneus	Placental	Yes	Yes	KRAB-SSXRD-SET	3
Sousa chinensis	Placental	Yes	--	--	--
Spermophilus dauricus	Placental	Yes	--	--	--
Squalius pyrenaicus	Bony fish	--	Yes	SET	1
Suricata suricatta	Placental	Yes	--	--	--
Sus scrofa	Placental	Yes	Yes	KRAB-SSXRD-SET	3
Tachysurus fulvidraco	Bony fish	Yes	--	--	--
Takifugu rubripes	Bony fish	--	Yes	SET	1
Terrapene carolina	Turtle	Yes	--	--	--
Thamnophis elegans	Squamata	Yes	--	--	--
Thamnophis sirtalis	Squamata	Yes	Yes	KRAB-SSXRD-SET	3
Theropithecus gelada	Placental	Yes	--	--	--
Trichechus manatus	Placental	Yes	Yes	KRAB-SSXRD-SET	3
Tupaia chinensis	Placental	Yes	Yes	KRAB-SSXRD-SET	3
Tursiops truncatus	Placental	Yes	Yes	KRAB-SSXRD-SET	3
Urocitellus parryii	Placental	Yes	--	--	--
Ursus arctos	Placental	Yes	--	--	--
Ursus maritimus	Placental	Yes	Yes	KRAB-SSXRD-SET	3
Vicugna pacos	Placental	Yes	Yes	KRAB-SSXRD-SET	3
Vipera berus	Squamata	--	Yes	KRAB-SET	3
Vombatus ursinus	Marsupial	Yes	--	--	--
Vulpes vulpes	Placental	Yes	--	--	--
Xenopus laevis	Amphibians	Yes	--	--	--
Xenopus tropicalis	Amphibians	Yes	--	--	--
Xiphophorus maculatus	Bony fish	--	Yes	SET	1
Zalophus californianus	Placental	Yes	--	--	--
